# Supplementary material for: Theoretical study on the mechanism and stereochemistry of the cinchona–thiourea organocatalytic hydrophosphonylation of an α-ketoester
Source: Royal Society of Chemistry journal article supplement (doi:10.1039/c3ob41397g), 2013-01-01
Supplement: c3ob41397g.pdf [file c3ob41397g.pdf]

## Supporting Information

# Theoretical study on the mechanism and stereochemistry of cinchona-thiourea organocatalytic hydrophosphonylation of $\alpha$ -ketoester

Weiyi Li<sup>\*a</sup>, Dongfeng Huang<sup>\*b</sup> and Yajing Lv<sup>a</sup>

<sup>a</sup> *Research Center for Advanced Computation, School of Physics and Chemistry, Xihua University, Chengdu, Sichuan, 610039, P. R. China.*

*E-mail: lwyscu@aliyun.com ; Fax: 086-028-87723006; Tel: 086-028-87723006*

<sup>b</sup> *College of Chemistry and Chemical Engineering, Anyang Normal University, Anyang, Henan 455000, P. R. China. E-mail: hdf1101@aynu.edu.cn*

### CONTENTS:

|                                                                                               |     |
|-----------------------------------------------------------------------------------------------|-----|
| S1: Summarize energies of all species over actual reaction system.....                        | 2   |
| S2. Cartesian coordinates of all optimized structures over actual reaction system.....        | 3   |
| S3 Energies of C-P bond formation TSs over (R)-CAT, (S)-Py-CAT, (S)-Ac-CAT . .....            | 51  |
| S4: Cartesian coordinates of C-P bond formation TSs over (R)-CAT, (S)-Py-CAT, (S)-Ac-CAT..... | 52  |
| S5 Energies of optimized structures with different R substituents.....                        | 75  |
| S6: Cartesian coordinates of optimized structures with different R substituents. ....         | 76  |
| S7: Reference 23 details.....                                                                 | 108 |

*S1: Summarize energies of all species over actual reaction system.*

| Species             | $E_{zpc}$<br>(Hartree) | $G_c^a$<br>(Hartree) | SCF <sub>PCM</sub> <sup>b</sup><br>(Hartree) | $D_c^c$<br>(Hartree) | SCF <sub>PCM</sub> + $G_c$ + $D_c$<br>(Hartree) | $\Delta G$<br>(kcal/mol) |
|---------------------|------------------------|----------------------|----------------------------------------------|----------------------|-------------------------------------------------|--------------------------|
| $\alpha$ -ketoester | -573.31208             | 0.11472              | -573.60978                                   | -0.03589             | -573.53095                                      | -                        |
| DMHP                | -647.40434             | 0.06705              | -647.61797                                   | -0.01717             | -647.56809                                      | -                        |
| (S)-CAT             | -1611.08754            | 0.47672              | -1625.13444                                  | -0.14863             | -1624.80635                                     | -                        |
| Product             | -1220.71924            | 0.20778              | -1221.23674                                  | -0.06921             | -1221.10005                                     | -0.6                     |
| <i>s</i> -IM1       | -2258.50500            | 0.56264              | -2272.76592                                  | -0.17811             | -2272.38139                                     | -4.4                     |
| <i>s</i> -TS1       | -2258.48843            | 0.56423              | -2272.74824                                  | -0.18423             | -2272.36825                                     | 3.9                      |
| <i>s</i> -IM2a      | -2258.48941            | 0.56980              | -2272.75939                                  | -0.18419             | -2272.37489                                     | -0.3                     |
| <i>s</i> -TS-ex     | -2258.48723            | 0.57145              | -2272.75734                                  | -0.18643             | -2272.37232                                     | 1.3                      |
| <i>s</i> -IM2b      | -2258.49134            | 0.56813              | -2272.75948                                  | -0.17811             | -2272.37614                                     | -1.1                     |
| <i>k</i> -IM0       | -2184.39063            | 0.61075              | -2198.73375                                  | -0.19604             | -2198.31904                                     | 11.5                     |
| <i>k</i> -IM1       | -2831.80304            | 0.70144              | -2846.35761                                  | -0.23544             | -2845.89161                                     | 8.7                      |
| <i>k</i> -TS1       | -2831.78298            | 0.70273              | -2846.33705                                  | -0.24431             | -2845.87863                                     | 16.8                     |
| <i>k</i> -IM2       | -2831.78400            | 0.70735              | -2846.34617                                  | -0.24292             | -2845.88174                                     | 14.8                     |
| <i>ds</i> -IM3      | -2831.81566            | 0.70522              | -2846.37687                                  | -0.23977             | -2845.91141                                     | -3.8                     |
| <i>ds</i> -TS2      | -2831.81190            | 0.70944              | -2846.37487                                  | -0.24231             | -2845.90783                                     | -1.5                     |
| <i>ds</i> -IM4      | -2831.81714            | 0.71124              | -2846.37906                                  | -0.24585             | -2845.91367                                     | -5.2                     |
| <i>ds</i> -TS3      | -2831.81885            | 0.70607              | -2846.37719                                  | -0.24620             | -2845.91731                                     | -7.5                     |
| <i>ds</i> -IM5      | -2831.82066            | 0.70807              | -2846.38300                                  | -0.23851             | -2845.91343                                     | -5.0                     |
| <i>ms</i> -IM3      | -2831.81254            | 0.70469              | -2272.76592                                  | -0.24126             | -2845.90854                                     | -2.0                     |
| <i>ms</i> -TS2      | -2831.81143            | 0.70912              | -2272.74824                                  | -0.24387             | -2845.90518                                     | 0.1                      |
| <i>ms</i> -IM4      | -2831.82153            | 0.70964              | -2272.75939                                  | -0.24585             | -2845.91766                                     | -7.7                     |
| <i>ms</i> -TS3      | -2831.82432            | 0.70689              | -2272.75734                                  | -0.24620             | -2845.92071                                     | -9.6                     |
| <i>ms</i> -IM5      | -2831.82750            | 0.70994              | -2272.75948                                  | -0.24396             | -2845.92330                                     | -11.2                    |
| <i>dr</i> -IM3      | -2831.81195            | 0.70342              | -2846.37244                                  | -0.23573             | -2845.90475                                     | 0.4                      |
| <i>dr</i> -TS2      | -2831.80519            | 0.70828              | -2846.36766                                  | -0.24291             | -2845.90229                                     | 1.9                      |
| <i>dr</i> -IM4      | -2831.81306            | 0.71139              | -2846.37408                                  | -0.24841             | -2845.91111                                     | -3.6                     |
| <i>dr</i> -TS3      | -2831.81310            | 0.70721              | -2846.37048                                  | -0.24726             | -2845.91054                                     | -3.2                     |
| <i>dr</i> -IM5      | -2831.81382            | 0.70848              | -2846.37498                                  | -0.24361             | -2845.91126                                     | -3.7                     |
| <i>mr</i> -IM3      | -2831.81368            | 0.70441              | -2846.37502                                  | -0.23647             | -2845.90708                                     | -1.1                     |
| <i>mr</i> -TS2      | -2831.80430            | 0.70897              | -2846.36490                                  | -0.24089             | -2845.89682                                     | 5.4                      |
| <i>mr</i> -IM4      | -2831.82122            | 0.71085              | -2846.38159                                  | -0.24412             | -2845.91486                                     | -5.9                     |
| <i>mr</i> -TS3      | -2831.82367            | 0.70679              | -2846.38096                                  | -0.24451             | -2845.91868                                     | -8.3                     |
| <i>mr</i> -IM5      | -2831.82633            | 0.70931              | -2846.38756                                  | -0.24128             | -2845.91954                                     | -8.9                     |

*a*: Thermal correction to Gibbs Free Energy.

*b*: Total electronic energy in solvent.

*c*: Dispersion effect correction energy.

## *S2. Cartesian coordinates of all optimized structures over actual reaction system.*

### $\alpha$ -ketoester

Standard orientation:

| Center Number | Atomic Number | Atomic Type | Coordinates (Angstroms) |           |           |
|---------------|---------------|-------------|-------------------------|-----------|-----------|
|               |               |             | X                       | Y         | Z         |
| 1             | 6             | 0           | -3.817205               | -0.416616 | -1.746857 |
| 2             | 6             | 0           | -2.451159               | -1.097046 | -1.953702 |
| 3             | 8             | 0           | -4.042187               | -0.157687 | -0.455073 |
| 4             | 6             | 0           | -5.249143               | 0.576526  | -0.154366 |
| 5             | 1             | 0           | -5.219265               | 1.556766  | -0.636349 |
| 6             | 1             | 0           | -6.125625               | 0.023732  | -0.502281 |
| 7             | 1             | 0           | -5.258103               | 0.677113  | 0.930501  |
| 8             | 8             | 0           | -4.553949               | -0.109244 | -2.662125 |
| 9             | 8             | 0           | -1.460347               | -0.507994 | -1.552517 |
| 10            | 6             | 0           | -2.400995               | -2.396516 | -2.671850 |
| 11            | 6             | 0           | -3.557719               | -3.049695 | -3.130705 |
| 12            | 6             | 0           | -1.142640               | -2.994887 | -2.866181 |
| 13            | 6             | 0           | -3.454061               | -4.284288 | -3.773286 |
| 14            | 1             | 0           | -4.531910               | -2.589330 | -3.004755 |
| 15            | 6             | 0           | -1.044233               | -4.225322 | -3.509036 |
| 16            | 1             | 0           | -0.258592               | -2.479165 | -2.504227 |
| 17            | 6             | 0           | -2.200620               | -4.872449 | -3.963265 |
| 18            | 1             | 0           | -4.350906               | -4.783646 | -4.129599 |
| 19            | 1             | 0           | -0.069915               | -4.683270 | -3.657257 |
| 20            | 1             | 0           | -2.122727               | -5.833482 | -4.465372 |

### DMHP

Standard orientation:

| Center Number | Atomic Number | Atomic Type | Coordinates (Angstroms) |           |           |
|---------------|---------------|-------------|-------------------------|-----------|-----------|
|               |               |             | X                       | Y         | Z         |
| 1             | 1             | 0           | 0.209645                | -0.655673 | -1.151524 |
| 2             | 8             | 0           | 1.701245                | 0.752399  | 0.181151  |
| 3             | 15            | 0           | 1.532751                | -0.324304 | -0.829303 |
| 4             | 8             | 0           | 2.236793                | -1.732341 | -0.440187 |
| 5             | 6             | 0           | 2.356046                | -2.132324 | 0.940771  |
| 6             | 1             | 0           | 3.093604                | -2.936477 | 0.960401  |
| 7             | 1             | 0           | 2.689501                | -1.294210 | 1.557746  |
| 8             | 1             | 0           | 1.394868                | -2.507772 | 1.309266  |
| 9             | 8             | 0           | 2.084001                | -0.072678 | -2.317137 |
| 10            | 6             | 0           | 3.436437                | 0.384245  | -2.531532 |
| 11            | 1             | 0           | 4.147532                | -0.397905 | -2.248606 |
| 12            | 1             | 0           | 3.626376                | 1.296214  | -1.958429 |
| 13            | 1             | 0           | 3.516600                | 0.589843  | -3.599713 |

### (S)-CAT

Standard orientation:

| Center Number | Atomic Number | Atomic Type | Coordinates (Angstroms) |           |           |
|---------------|---------------|-------------|-------------------------|-----------|-----------|
|               |               |             | X                       | Y         | Z         |
| 1             | 7             | 0           | -2.699437               | -0.253417 | -0.699260 |
| 2             | 6             | 0           | -1.509152               | -0.090439 | -0.013491 |

|    |    |   |           |           |           |
|----|----|---|-----------|-----------|-----------|
| 3  | 7  | 0 | -0.477594 | 0.127241  | -0.900826 |
| 4  | 16 | 0 | -1.346005 | -0.102356 | 1.653898  |
| 5  | 6  | 0 | -3.990760 | -0.704565 | -0.300133 |
| 6  | 6  | 0 | 0.950733  | 0.318274  | -0.579312 |
| 7  | 6  | 0 | 1.625594  | -1.016063 | -0.173913 |
| 8  | 6  | 0 | 3.169412  | -0.928229 | 0.018239  |
| 9  | 6  | 0 | 3.811567  | -2.179845 | -0.619001 |
| 10 | 7  | 0 | 1.301173  | -2.066234 | -1.178329 |
| 11 | 6  | 0 | 1.603109  | -3.376981 | -0.572415 |
| 12 | 6  | 0 | 3.097830  | -3.469074 | -0.103957 |
| 13 | 6  | 0 | 2.098249  | -1.925241 | -2.414974 |
| 14 | 6  | 0 | 3.623001  | -2.095054 | -2.144204 |
| 15 | 1  | 0 | -2.657061 | 0.036500  | -1.673894 |
| 16 | 6  | 0 | 1.181036  | 1.538335  | 0.351788  |
| 17 | 1  | 0 | 1.387833  | 0.603484  | -1.545475 |
| 18 | 1  | 0 | 3.426900  | -0.869761 | 1.080920  |
| 19 | 1  | 0 | 3.581456  | -0.026046 | -0.458274 |
| 20 | 1  | 0 | 1.391202  | -4.146515 | -1.323554 |
| 21 | 1  | 0 | 0.902211  | -3.534801 | 0.249986  |
| 22 | 6  | 0 | 3.368612  | -3.691603 | 1.399621  |
| 23 | 1  | 0 | 3.575066  | -4.319090 | -0.620576 |
| 24 | 1  | 0 | 1.732925  | -2.677138 | -3.124155 |
| 25 | 1  | 0 | 1.887592  | -0.948567 | -2.864772 |
| 26 | 1  | 0 | 4.192479  | -1.247778 | -2.548592 |
| 27 | 1  | 0 | 4.878126  | -2.222187 | -0.369746 |
| 28 | 1  | 0 | 4.011843  | -3.001463 | -2.626549 |
| 29 | 1  | 0 | -0.583783 | -0.391036 | -1.767017 |
| 30 | 6  | 0 | -4.288876 | -1.173946 | 0.977688  |
| 31 | 6  | 0 | -5.570126 | -1.615358 | 1.266127  |
| 32 | 6  | 0 | -6.564739 | -1.597388 | 0.302665  |
| 33 | 6  | 0 | -6.268641 | -1.130125 | -0.969970 |
| 34 | 6  | 0 | -4.995926 | -0.688446 | -1.273057 |
| 35 | 1  | 0 | -5.790376 | -1.977031 | 2.263047  |
| 36 | 1  | 0 | -7.562162 | -1.942424 | 0.538767  |
| 37 | 1  | 0 | -7.035845 | -1.110257 | -1.733963 |
| 38 | 1  | 0 | -4.767060 | -0.327413 | -2.266598 |
| 39 | 1  | 0 | -3.511449 | -1.172516 | 1.727059  |
| 40 | 6  | 0 | 0.916770  | 2.868672  | -0.150411 |
| 41 | 6  | 0 | 1.173324  | 3.960400  | 0.696839  |
| 42 | 7  | 0 | 1.666276  | 3.829932  | 2.003473  |
| 43 | 6  | 0 | 1.875629  | 2.597345  | 2.407403  |
| 44 | 6  | 0 | 1.648120  | 1.428161  | 1.617235  |
| 45 | 6  | 0 | 0.407419  | 3.142389  | -1.459079 |
| 46 | 1  | 0 | 1.847205  | 0.467732  | 2.067368  |
| 47 | 6  | 0 | 2.507146  | -3.769899 | 2.380642  |
| 48 | 1  | 0 | 2.832600  | -3.937009 | 3.397943  |
| 49 | 1  | 0 | 1.439430  | -3.677363 | 2.247691  |
| 50 | 1  | 0 | 4.426373  | -3.795652 | 1.619720  |
| 51 | 1  | 0 | 1.154339  | -1.345752 | 0.754732  |
| 52 | 6  | 0 | 0.929825  | 5.292251  | 0.233581  |
| 53 | 6  | 0 | 0.450757  | 5.513560  | -1.012668 |
| 54 | 6  | 0 | 0.183639  | 4.412838  | -1.872867 |
| 55 | 1  | 0 | 2.252827  | 2.471506  | 3.420024  |
| 56 | 1  | 0 | 1.141290  | 6.106530  | 0.914958  |
| 57 | 1  | 0 | 0.264839  | 6.520140  | -1.364755 |
| 58 | 1  | 0 | -0.204368 | 4.601519  | -2.865916 |
| 59 | 1  | 0 | 0.187411  | 2.317618  | -2.120405 |

-----  
Product

Standard orientation:  
-----

| Center<br>Number | Atomic<br>Number | Atomic<br>Type | Coordinates (Angstroms) |           |           |
|------------------|------------------|----------------|-------------------------|-----------|-----------|
|                  |                  |                | X                       | Y         | Z         |
| 1                | 1                | 0              | 1.028285                | 0.017899  | -1.602553 |
| 2                | 6                | 0              | 2.484354                | 1.243671  | -2.723083 |
| 3                | 6                | 0              | 2.943968                | 0.019891  | -1.900941 |
| 4                | 8                | 0              | 1.332514                | 1.632677  | -2.676048 |
| 5                | 8                | 0              | 1.780385                | -0.533306 | -1.302633 |
| 6                | 8                | 0              | 3.441757                | 1.789671  | -3.466522 |
| 7                | 6                | 0              | 3.049165                | 2.911755  | -4.290025 |
| 8                | 1                | 0              | 2.263237                | 2.603793  | -4.983238 |
| 9                | 1                | 0              | 2.691949                | 3.730656  | -3.661257 |
| 10               | 1                | 0              | 3.952624                | 3.198664  | -4.827159 |
| 11               | 6                | 0              | 3.979437                | 0.387795  | -0.829154 |
| 12               | 6                | 0              | 5.207805                | 0.987458  | -1.149129 |
| 13               | 6                | 0              | 6.113601                | 1.319272  | -0.140434 |
| 14               | 6                | 0              | 5.812068                | 1.055416  | 1.198837  |
| 15               | 6                | 0              | 3.682465                | 0.123367  | 0.514717  |
| 16               | 6                | 0              | 4.593910                | 0.455081  | 1.520997  |
| 17               | 1                | 0              | 5.460640                | 1.187539  | -2.183103 |
| 18               | 1                | 0              | 7.060263                | 1.783990  | -0.404894 |
| 19               | 1                | 0              | 6.520801                | 1.314434  | 1.981415  |
| 20               | 1                | 0              | 4.346070                | 0.242321  | 2.557956  |
| 21               | 1                | 0              | 2.736230                | -0.341167 | 0.764828  |
| 22               | 8                | 0              | 2.537470                | -1.466917 | -4.262047 |
| 23               | 15               | 0              | 3.453925                | -1.347665 | -3.093546 |
| 24               | 8                | 0              | 3.575543                | -2.674174 | -2.180640 |
| 25               | 6                | 0              | 2.462023                | -3.583264 | -2.028929 |
| 26               | 1                | 0              | 2.894590                | -4.536697 | -1.719066 |
| 27               | 1                | 0              | 1.931292                | -3.696877 | -2.977673 |
| 28               | 1                | 0              | 1.784679                | -3.203776 | -1.260778 |
| 29               | 8                | 0              | 4.997707                | -1.027263 | -3.413928 |
| 30               | 6                | 0              | 5.699357                | -1.807817 | -4.404053 |
| 31               | 1                | 0              | 5.845595                | -2.830053 | -4.041593 |
| 32               | 1                | 0              | 5.144695                | -1.814982 | -5.346796 |
| 33               | 1                | 0              | 6.666656                | -1.321222 | -4.539413 |

### s-IM1

Standard orientation:

| Center<br>Number | Atomic<br>Number | Atomic<br>Type | Coordinates (Angstroms) |           |           |
|------------------|------------------|----------------|-------------------------|-----------|-----------|
|                  |                  |                | X                       | Y         | Z         |
| 1                | 7                | 0              | -0.049833               | 3.258378  | -0.118422 |
| 2                | 6                | 0              | -1.199382               | 2.911109  | 0.561951  |
| 3                | 7                | 0              | -0.998980               | 1.808146  | 1.342023  |
| 4                | 16               | 0              | -2.676711               | 3.723316  | 0.462257  |
| 5                | 6                | 0              | 0.268278                | 4.349481  | -0.974522 |
| 6                | 6                | 0              | -1.987110               | 1.048789  | 2.122028  |
| 7                | 6                | 0              | -2.993857               | 0.280935  | 1.225856  |
| 8                | 6                | 0              | -4.048676               | -0.553933 | 2.012699  |
| 9                | 6                | 0              | -4.259516               | -1.895968 | 1.279176  |
| 10               | 7                | 0              | -2.270667               | -0.605795 | 0.268298  |
| 11               | 6                | 0              | -3.216980               | -0.964652 | -0.806419 |
| 12               | 6                | 0              | -4.512033               | -1.645462 | -0.240608 |
| 13               | 6                | 0              | -1.796558               | -1.848211 | 0.910403  |
| 14               | 6                | 0              | -2.973682               | -2.727111 | 1.428297  |
| 15               | 1                | 0              | 0.726112                | 2.603416  | 0.005915  |
| 16               | 6                | 0              | -2.595014               | 1.907999  | 3.269066  |
| 17               | 1                | 0              | -1.380374               | 0.281337  | 2.617401  |
| 18               | 1                | 0              | -4.995616               | -0.009973 | 2.087788  |

|    |    |   |           |           |           |
|----|----|---|-----------|-----------|-----------|
| 19 | 1  | 0 | -3.715789 | -0.752700 | 3.042655  |
| 20 | 1  | 0 | -2.700188 | -1.648323 | -1.490952 |
| 21 | 1  | 0 | -3.440321 | -0.057641 | -1.371780 |
| 22 | 6  | 0 | -5.860527 | -0.930283 | -0.470696 |
| 23 | 1  | 0 | -4.618290 | -2.638962 | -0.708628 |
| 24 | 1  | 0 | -1.198681 | -2.394902 | 0.169763  |
| 25 | 1  | 0 | -1.117233 | -1.582794 | 1.728154  |
| 26 | 1  | 0 | -2.823639 | -3.007197 | 2.479416  |
| 27 | 1  | 0 | -5.111397 | -2.432142 | 1.713101  |
| 28 | 1  | 0 | -3.052338 | -3.660719 | 0.855587  |
| 29 | 1  | 0 | -0.118273 | 1.322320  | 1.191905  |
| 30 | 1  | 0 | 0.143962  | -0.641952 | -1.206207 |
| 31 | 6  | 0 | -0.623849 | 5.365632  | -1.313330 |
| 32 | 6  | 0 | -0.215535 | 6.387950  | -2.154419 |
| 33 | 6  | 0 | 1.070099  | 6.419464  | -2.667984 |
| 34 | 6  | 0 | 1.960005  | 5.409528  | -2.330641 |
| 35 | 6  | 0 | 1.567916  | 4.384228  | -1.493452 |
| 36 | 1  | 0 | 2.263711  | 3.600227  | -1.227708 |
| 37 | 1  | 0 | 2.969283  | 5.421929  | -2.722759 |
| 38 | 1  | 0 | 1.378802  | 7.221998  | -3.323854 |
| 39 | 1  | 0 | -0.917925 | 7.171735  | -2.410384 |
| 40 | 1  | 0 | -1.623703 | 5.324245  | -0.905181 |
| 41 | 6  | 0 | -3.864731 | 2.376333  | 3.250503  |
| 42 | 6  | 0 | -4.369034 | 3.143353  | 4.345947  |
| 43 | 7  | 0 | -3.684703 | 3.454342  | 5.423578  |
| 44 | 6  | 0 | -2.361235 | 2.991157  | 5.450762  |
| 45 | 6  | 0 | -1.779408 | 2.234720  | 4.418275  |
| 46 | 6  | 0 | -1.589625 | 3.329126  | 6.607522  |
| 47 | 6  | 0 | -0.299735 | 2.935053  | 6.717781  |
| 48 | 6  | 0 | 0.298535  | 2.178532  | 5.672778  |
| 49 | 6  | 0 | -0.411543 | 1.842010  | 4.569221  |
| 50 | 1  | 0 | -4.521519 | 2.198193  | 2.412921  |
| 51 | 1  | 0 | -5.395813 | 3.499719  | 4.298419  |
| 52 | 1  | 0 | 0.066980  | 1.277956  | 3.782608  |
| 53 | 1  | 0 | 1.333605  | 1.875179  | 5.766749  |
| 54 | 1  | 0 | 0.286295  | 3.191604  | 7.590912  |
| 55 | 1  | 0 | -2.075317 | 3.909963  | 7.381335  |
| 56 | 1  | 0 | -3.503534 | 1.022209  | 0.607678  |
| 57 | 6  | 0 | -6.082767 | 0.228989  | -1.034022 |
| 58 | 1  | 0 | -6.703538 | -1.506825 | -0.103439 |
| 59 | 1  | 0 | -7.086980 | 0.615612  | -1.138548 |
| 60 | 1  | 0 | -5.301447 | 0.864717  | -1.423734 |
| 61 | 8  | 0 | 1.577128  | 0.736963  | 0.196104  |
| 62 | 15 | 0 | 1.457611  | -0.322082 | -0.857536 |
| 63 | 8  | 0 | 2.189541  | -1.705954 | -0.460898 |
| 64 | 6  | 0 | 2.401265  | -2.092316 | 0.914917  |
| 65 | 1  | 0 | 3.177342  | -2.858979 | 0.895367  |
| 66 | 1  | 0 | 2.727728  | -1.235579 | 1.509050  |
| 67 | 1  | 0 | 1.479868  | -2.511492 | 1.331182  |
| 68 | 8  | 0 | 2.059283  | -0.004441 | -2.305258 |
| 69 | 6  | 0 | 3.451906  | 0.337430  | -2.488708 |
| 70 | 1  | 0 | 4.080220  | -0.530753 | -2.270630 |
| 71 | 1  | 0 | 3.727233  | 1.179239  | -1.847217 |
| 72 | 1  | 0 | 3.552312  | 0.618932  | -3.537261 |

s-TS1

Standard orientation:

| Center Number | Atomic Number | Atomic Type | Coordinates (Angstroms) |   |   |
|---------------|---------------|-------------|-------------------------|---|---|
|               |               |             | X                       | Y | Z |

|    |    |   |           |           |           |
|----|----|---|-----------|-----------|-----------|
| 1  | 7  | 0 | 0.017695  | 3.302498  | -0.140897 |
| 2  | 6  | 0 | -1.119771 | 2.927278  | 0.529002  |
| 3  | 7  | 0 | -0.869528 | 1.880990  | 1.379270  |
| 4  | 16 | 0 | -2.655629 | 3.610155  | 0.332299  |
| 5  | 6  | 0 | 0.300198  | 4.403944  | -0.995899 |
| 6  | 6  | 0 | -1.825624 | 1.074559  | 2.146428  |
| 7  | 6  | 0 | -2.765221 | 0.257820  | 1.215478  |
| 8  | 6  | 0 | -3.966224 | -0.458481 | 1.888082  |
| 9  | 6  | 0 | -4.212279 | -1.809763 | 1.182604  |
| 10 | 7  | 0 | -1.977899 | -0.800571 | 0.466804  |
| 11 | 6  | 0 | -2.752777 | -1.179847 | -0.752810 |
| 12 | 6  | 0 | -4.197510 | -1.617265 | -0.364999 |
| 13 | 6  | 0 | -1.736994 | -2.021770 | 1.295080  |
| 14 | 6  | 0 | -3.067039 | -2.764111 | 1.562434  |
| 15 | 1  | 0 | 0.791668  | 2.623723  | -0.064006 |
| 16 | 6  | 0 | -2.496937 | 1.894351  | 3.286513  |
| 17 | 1  | 0 | -1.190660 | 0.335770  | 2.645741  |
| 18 | 1  | 0 | -4.856342 | 0.172255  | 1.820397  |
| 19 | 1  | 0 | -3.779031 | -0.630933 | 2.957163  |
| 20 | 1  | 0 | -2.205509 | -1.992764 | -1.239561 |
| 21 | 1  | 0 | -2.727682 | -0.324467 | -1.428934 |
| 22 | 6  | 0 | -5.363396 | -0.722411 | -0.834156 |
| 23 | 1  | 0 | -4.379610 | -2.609932 | -0.807988 |
| 24 | 1  | 0 | -1.011070 | -2.636456 | 0.752756  |
| 25 | 1  | 0 | -1.254920 | -1.704441 | 2.223754  |
| 26 | 1  | 0 | -3.137215 | -3.048984 | 2.618816  |
| 27 | 1  | 0 | -5.175736 | -2.226911 | 1.494435  |
| 28 | 1  | 0 | -3.125471 | -3.688806 | 0.975176  |
| 29 | 1  | 0 | 0.089920  | 1.531460  | 1.357661  |
| 30 | 1  | 0 | -0.771296 | -0.501385 | 0.057792  |
| 31 | 6  | 0 | -0.575276 | 5.463509  | -1.226981 |
| 32 | 6  | 0 | -0.194028 | 6.503102  | -2.060264 |
| 33 | 6  | 0 | 1.048864  | 6.508940  | -2.669492 |
| 34 | 6  | 0 | 1.923464  | 5.455872  | -2.438140 |
| 35 | 6  | 0 | 1.558234  | 4.413161  | -1.610773 |
| 36 | 1  | 0 | 2.240932  | 3.594454  | -1.426392 |
| 37 | 1  | 0 | 2.899729  | 5.448286  | -2.906518 |
| 38 | 1  | 0 | 1.336916  | 7.324696  | -3.318467 |
| 39 | 1  | 0 | -0.883692 | 7.320141  | -2.232847 |
| 40 | 1  | 0 | -1.546676 | 5.444751  | -0.755466 |
| 41 | 6  | 0 | -3.743304 | 2.412407  | 3.190956  |
| 42 | 6  | 0 | -4.304372 | 3.150653  | 4.278954  |
| 43 | 7  | 0 | -3.694027 | 3.386341  | 5.417860  |
| 44 | 6  | 0 | -2.391492 | 2.876610  | 5.522949  |
| 45 | 6  | 0 | -1.755795 | 2.145102  | 4.503658  |
| 46 | 6  | 0 | -1.701125 | 3.141134  | 6.747827  |
| 47 | 6  | 0 | -0.433947 | 2.704483  | 6.935627  |
| 48 | 6  | 0 | 0.221051  | 1.977841  | 5.903745  |
| 49 | 6  | 0 | -0.412904 | 1.708753  | 4.736894  |
| 50 | 1  | 0 | -4.335611 | 2.298508  | 2.296144  |
| 51 | 1  | 0 | -5.311449 | 3.547279  | 4.170380  |
| 52 | 1  | 0 | 0.114565  | 1.168575  | 3.965017  |
| 53 | 1  | 0 | 1.239242  | 1.642923  | 6.057741  |
| 54 | 1  | 0 | 0.091759  | 2.906065  | 7.860135  |
| 55 | 1  | 0 | -2.228436 | 3.703378  | 7.508073  |
| 56 | 1  | 0 | -3.133276 | 0.941138  | 0.449155  |
| 57 | 6  | 0 | -5.312390 | 0.376772  | -1.540762 |
| 58 | 1  | 0 | -6.327733 | -1.108851 | -0.522320 |
| 59 | 1  | 0 | -6.215927 | 0.904203  | -1.814328 |
| 60 | 1  | 0 | -4.394324 | 0.825185  | -1.892581 |
| 61 | 8  | 0 | 1.595114  | 0.911469  | 0.203482  |
| 62 | 15 | 0 | 0.906378  | -0.307363 | -0.421576 |

|    |   |   |          |           |           |
|----|---|---|----------|-----------|-----------|
| 63 | 8 | 0 | 1.871658 | -1.645644 | -0.161661 |
| 64 | 6 | 0 | 2.763535 | -1.699712 | 0.957818  |
| 65 | 1 | 0 | 3.474096 | -2.505161 | 0.753471  |
| 66 | 1 | 0 | 3.295472 | -0.752475 | 1.083351  |
| 67 | 1 | 0 | 2.217185 | -1.933473 | 1.882309  |
| 68 | 8 | 0 | 0.924417 | -0.284765 | -2.062622 |
| 69 | 6 | 0 | 2.151763 | -0.092903 | -2.789429 |
| 70 | 1 | 0 | 2.815324 | -0.951951 | -2.646620 |
| 71 | 1 | 0 | 2.655138 | 0.823264  | -2.463781 |
| 72 | 1 | 0 | 1.876070 | -0.007656 | -3.842854 |

**s-IM2a**

Standard orientation:

| Center Number | Atomic Number | Atomic Type | Coordinates (Angstroms) |           |           |
|---------------|---------------|-------------|-------------------------|-----------|-----------|
|               |               |             | X                       | Y         | Z         |
| 1             | 7             | 0           | -1.696118               | -1.731904 | -0.253518 |
| 2             | 6             | 0           | -0.490189               | -1.245856 | -0.679867 |
| 3             | 7             | 0           | 0.141430                | -0.552316 | 0.321309  |
| 4             | 16            | 0           | 0.153071                | -1.412218 | -2.241591 |
| 5             | 6             | 0           | -2.691259               | -2.508344 | -0.911939 |
| 6             | 6             | 0           | 1.392354                | 0.195251  | 0.251735  |
| 7             | 6             | 0           | 1.277807                | 1.419959  | -0.690336 |
| 8             | 6             | 0           | 2.525972                | 2.323696  | -0.811119 |
| 9             | 6             | 0           | 2.083695                | 3.798767  | -0.933601 |
| 10            | 7             | 0           | 0.132754                | 2.330427  | -0.241808 |
| 11            | 6             | 0           | -0.296448               | 3.171446  | -1.416692 |
| 12            | 6             | 0           | 0.936685                | 3.929588  | -1.983698 |
| 13            | 6             | 0           | 0.509760                | 3.224300  | 0.917245  |
| 14            | 6             | 0           | 1.546762                | 4.258388  | 0.434277  |
| 15            | 1             | 0           | -1.991110               | -1.359597 | 0.667540  |
| 16            | 6             | 0           | 2.628207                | -0.716098 | 0.002691  |
| 17            | 1             | 0           | 1.512345                | 0.597576  | 1.264594  |
| 18            | 1             | 0           | 3.106715                | 2.025298  | -1.687460 |
| 19            | 1             | 0           | 3.182318                | 2.205065  | 0.061992  |
| 20            | 1             | 0           | -1.066849               | 3.851739  | -1.046078 |
| 21            | 1             | 0           | -0.763432               | 2.494653  | -2.131485 |
| 22            | 6             | 0           | 1.414084                | 3.542771  | -3.398266 |
| 23            | 1             | 0           | 0.673512                | 4.997812  | -2.029732 |
| 24            | 1             | 0           | -0.419261               | 3.662003  | 1.288585  |
| 25            | 1             | 0           | 0.893113                | 2.578521  | 1.708515  |
| 26            | 1             | 0           | 2.362989                | 4.332582  | 1.161227  |
| 27            | 1             | 0           | 2.931302                | 4.421549  | -1.236771 |
| 28            | 1             | 0           | 1.095901                | 5.254663  | 0.355172  |
| 29            | 1             | 0           | -0.421218               | -0.425950 | 1.181789  |
| 30            | 1             | 0           | -0.713959               | 1.789649  | 0.086327  |
| 31            | 6             | 0           | -2.465333               | -3.247445 | -2.071567 |
| 32            | 6             | 0           | -3.492596               | -3.998339 | -2.621115 |
| 33            | 6             | 0           | -4.743668               | -4.031371 | -2.030263 |
| 34            | 6             | 0           | -4.968644               | -3.300145 | -0.871412 |
| 35            | 6             | 0           | -3.956759               | -2.544636 | -0.313680 |
| 36            | 1             | 0           | -4.131257               | -1.971678 | 0.588205  |
| 37            | 1             | 0           | -5.942809               | -3.317807 | -0.399067 |
| 38            | 1             | 0           | -5.538872               | -4.621098 | -2.465769 |
| 39            | 1             | 0           | -3.306164               | -4.566743 | -3.523830 |
| 40            | 1             | 0           | -1.490146               | -3.208933 | -2.533341 |
| 41            | 6             | 0           | 3.268941                | -0.793033 | -1.186224 |
| 42            | 6             | 0           | 4.405729                | -1.646954 | -1.337129 |
| 43            | 7             | 0           | 4.908773                | -2.399057 | -0.385391 |
| 44            | 6             | 0           | 4.239909                | -2.346472 | 0.846882  |



|    |    |   |           |           |           |
|----|----|---|-----------|-----------|-----------|
| 45 | 6  | 0 | 3.111822  | -1.541957 | 1.086688  |
| 46 | 6  | 0 | 4.758962  | -3.173826 | 1.891926  |
| 47 | 6  | 0 | 4.168459  | -3.199202 | 3.109709  |
| 48 | 6  | 0 | 3.018777  | -2.398662 | 3.354412  |
| 49 | 6  | 0 | 2.510638  | -1.601252 | 2.383653  |
| 50 | 1  | 0 | 2.940054  | -0.233945 | -2.048787 |
| 51 | 1  | 0 | 4.901847  | -1.681420 | -2.304538 |
| 52 | 1  | 0 | 1.626127  | -1.016734 | 2.589776  |
| 53 | 1  | 0 | 2.546288  | -2.435461 | 4.328120  |
| 54 | 1  | 0 | 4.556794  | -3.827226 | 3.901387  |
| 55 | 1  | 0 | 5.630929  | -3.775335 | 1.668650  |
| 56 | 1  | 0 | 0.970032  | 1.053731  | -1.670016 |
| 57 | 6  | 0 | 0.937620  | 2.621514  | -4.194719 |
| 58 | 1  | 0 | 2.246725  | 4.154611  | -3.726988 |
| 59 | 1  | 0 | 1.365232  | 2.462026  | -5.175309 |
| 60 | 1  | 0 | 0.110223  | 1.972278  | -3.944377 |
| 61 | 8  | 0 | -1.922238 | -0.091469 | 2.076839  |
| 62 | 15 | 0 | -2.430514 | 1.281889  | 1.571595  |
| 63 | 8  | 0 | -2.350050 | 2.363539  | 2.862470  |
| 64 | 6  | 0 | -2.771081 | 1.942888  | 4.170148  |
| 65 | 1  | 0 | -2.554746 | 2.769361  | 4.853527  |
| 66 | 1  | 0 | -3.846184 | 1.728591  | 4.182827  |
| 67 | 1  | 0 | -2.225744 | 1.045873  | 4.481933  |
| 68 | 8  | 0 | -4.092956 | 1.027937  | 1.461731  |
| 69 | 6  | 0 | -4.910241 | 2.095228  | 0.993582  |
| 70 | 1  | 0 | -4.542237 | 2.500692  | 0.038893  |
| 71 | 1  | 0 | -4.962134 | 2.911820  | 1.726477  |
| 72 | 1  | 0 | -5.913460 | 1.687653  | 0.839136  |

s-TS-ex

Standard orientation:

| Center<br>Number | Atomic<br>Number | Atomic<br>Type | Coordinates (Angstroms) |           |           |
|------------------|------------------|----------------|-------------------------|-----------|-----------|
|                  |                  |                | X                       | Y         | Z         |
| 1                | 7                | 0              | 1.322394                | 1.918962  | -0.050572 |
| 2                | 6                | 0              | 0.146612                | 1.362180  | -0.486622 |
| 3                | 7                | 0              | -0.338145               | 0.457408  | 0.425369  |
| 4                | 16               | 0              | -0.611398               | 1.679459  | -1.967458 |
| 5                | 6                | 0              | -1.347116               | -0.575213 | 0.194210  |
| 6                | 6                | 0              | -0.852922               | -1.590686 | -0.864717 |
| 7                | 6                | 0              | -1.771772               | -2.786028 | -1.194674 |
| 8                | 6                | 0              | -0.909897               | -4.044614 | -1.437071 |
| 9                | 7                | 0              | 0.485954                | -2.189614 | -0.408315 |
| 10               | 6                | 0              | 1.216620                | -2.721417 | -1.620141 |
| 11               | 6                | 0              | 0.286192                | -3.707077 | -2.380927 |
| 12               | 6                | 0              | 0.318976                | -3.303327 | 0.607033  |
| 13               | 6                | 0              | -0.347460               | -4.509806 | -0.083616 |
| 14               | 1                | 0              | 1.755610                | 1.407075  | 0.739037  |
| 15               | 1                | 0              | -1.386065               | -1.117652 | 1.146727  |
| 16               | 1                | 0              | -2.364164               | -2.551851 | -2.082404 |
| 17               | 1                | 0              | -2.480980               | -2.974634 | -0.377266 |
| 18               | 1                | 0              | 2.120528                | -3.198975 | -1.239399 |
| 19               | 1                | 0              | 1.513741                | -1.855649 | -2.210723 |
| 20               | 1                | 0              | 0.848238                | -4.643518 | -2.520479 |
| 21               | 1                | 0              | 1.315741                | -3.512295 | 0.995787  |
| 22               | 1                | 0              | -0.275971               | -2.902119 | 1.428304  |
| 23               | 1                | 0              | -1.150141               | -4.901575 | 0.550687  |
| 24               | 1                | 0              | -1.518680               | -4.835045 | -1.887127 |
| 25               | 1                | 0              | 0.375185                | -5.321883 | -0.224812 |

|    |    |   |           |           |           |
|----|----|---|-----------|-----------|-----------|
| 26 | 1  | 0 | 0.297038  | 0.263865  | 1.216972  |
| 27 | 1  | 0 | -0.610130 | -1.032900 | -1.770364 |
| 28 | 1  | 0 | 1.076834  | -1.463046 | 0.033416  |
| 29 | 6  | 0 | 2.074625  | 3.027103  | -0.532057 |
| 30 | 6  | 0 | 1.621750  | 3.914514  | -1.507349 |
| 31 | 6  | 0 | 3.331397  | 3.237755  | 0.047160  |
| 32 | 6  | 0 | 2.417567  | 4.981071  | -1.893175 |
| 33 | 1  | 0 | 0.655446  | 3.744209  | -1.957802 |
| 34 | 6  | 0 | 4.112895  | 4.305433  | -0.347046 |
| 35 | 1  | 0 | 3.681630  | 2.556493  | 0.810194  |
| 36 | 6  | 0 | 3.661894  | 5.184707  | -1.321786 |
| 37 | 1  | 0 | 2.054123  | 5.661944  | -2.652936 |
| 38 | 1  | 0 | 5.082861  | 4.453440  | 0.111017  |
| 39 | 1  | 0 | 4.276066  | 6.019877  | -1.629873 |
| 40 | 6  | 0 | -2.775324 | -0.004846 | -0.026760 |
| 41 | 6  | 0 | -3.477454 | 0.556339  | 1.105495  |
| 42 | 6  | 0 | -3.402439 | -0.001304 | -1.225384 |
| 43 | 6  | 0 | -4.780472 | 1.041556  | 0.896516  |
| 44 | 6  | 0 | -2.927569 | 0.657575  | 2.422370  |
| 45 | 6  | 0 | -4.728234 | 0.520518  | -1.342210 |
| 46 | 1  | 0 | -2.925429 | -0.369821 | -2.120529 |
| 47 | 6  | 0 | -5.515911 | 1.598026  | 1.990089  |
| 48 | 1  | 0 | -5.206116 | 0.504115  | -2.319220 |
| 49 | 6  | 0 | -0.199273 | -3.282832 | -3.782095 |
| 50 | 6  | 0 | 0.062163  | -2.180185 | -4.434656 |
| 51 | 1  | 0 | -0.821625 | -4.041516 | -4.243457 |
| 52 | 1  | 0 | -0.336725 | -2.015253 | -5.426353 |
| 53 | 1  | 0 | 0.676101  | -1.378727 | -4.048218 |
| 54 | 7  | 0 | -5.426754 | 1.019957  | -0.348449 |
| 55 | 6  | 0 | -4.966353 | 1.671455  | 3.224932  |
| 56 | 6  | 0 | -3.643793 | 1.194369  | 3.439765  |
| 57 | 1  | 0 | -1.918732 | 0.318328  | 2.605429  |
| 58 | 1  | 0 | -3.209561 | 1.268399  | 4.429029  |
| 59 | 1  | 0 | -5.519343 | 2.094924  | 4.053696  |
| 60 | 1  | 0 | -6.517256 | 1.957372  | 1.789582  |
| 61 | 8  | 0 | 1.891769  | -0.116871 | 1.854645  |
| 62 | 15 | 0 | 2.673126  | -1.384577 | 2.348208  |
| 63 | 8  | 0 | 3.326327  | -2.018064 | 0.858929  |
| 64 | 6  | 0 | 4.337039  | -1.304618 | 0.146581  |
| 65 | 1  | 0 | 4.542971  | -1.848554 | -0.782851 |
| 66 | 1  | 0 | 5.260772  | -1.254173 | 0.735273  |
| 67 | 1  | 0 | 4.011276  | -0.285404 | -0.103605 |
| 68 | 8  | 0 | 4.083226  | -0.808539 | 3.064761  |
| 69 | 6  | 0 | 4.467836  | 0.564867  | 3.087436  |
| 70 | 1  | 0 | 5.100504  | 0.809385  | 2.222918  |
| 71 | 1  | 0 | 3.591917  | 1.222872  | 3.087288  |
| 72 | 1  | 0 | 5.045767  | 0.722764  | 4.003667  |

**s-IM2b**

Standard orientation:

| Center<br>Number | Atomic<br>Number | Atomic<br>Type | Coordinates (Angstroms) |           |           |
|------------------|------------------|----------------|-------------------------|-----------|-----------|
|                  |                  |                | X                       | Y         | Z         |
| 1                | 6                | 0              | 0.149912                | 1.948144  | -0.212430 |
| 2                | 8                | 0              | 1.083024                | 2.516872  | 0.580020  |
| 3                | 8                | 0              | -1.037926               | 2.331297  | -0.228990 |
| 4                | 6                | 0              | 0.626831                | 0.799902  | -0.970361 |
| 5                | 6                | 0              | 4.554830                | -0.229705 | -1.252828 |
| 6                | 6                | 0              | 3.185408                | 0.150820  | -1.160233 |
| 7                | 6                | 0              | 2.017510                | 0.497693  | -1.075187 |

|    |   |   |           |           |           |
|----|---|---|-----------|-----------|-----------|
| 8  | 1 | 0 | 0.066770  | 0.690830  | -1.902230 |
| 9  | 6 | 0 | 0.791597  | 3.635695  | 1.488158  |
| 10 | 6 | 0 | 5.489521  | 0.184499  | -0.276728 |
| 11 | 6 | 0 | 6.829161  | -0.190680 | -0.368720 |
| 12 | 6 | 0 | 7.274010  | -0.986063 | -1.430851 |
| 13 | 6 | 0 | 6.359233  | -1.402194 | -2.404572 |
| 14 | 6 | 0 | 5.017671  | -1.031078 | -2.321045 |
| 15 | 1 | 0 | 5.147756  | 0.802531  | 0.547774  |
| 16 | 1 | 0 | 7.530563  | 0.140189  | 0.392893  |
| 17 | 1 | 0 | 8.318560  | -1.276245 | -1.499413 |
| 18 | 1 | 0 | 6.693096  | -2.018123 | -3.235670 |
| 19 | 1 | 0 | 4.312037  | -1.353103 | -3.080962 |
| 20 | 1 | 0 | -0.016404 | -0.305109 | -0.235915 |
| 21 | 6 | 0 | -2.017791 | -3.207858 | 0.179322  |
| 22 | 6 | 0 | -0.586860 | -2.614176 | 0.460348  |
| 23 | 7 | 0 | -2.873886 | -2.026643 | 0.316942  |
| 24 | 6 | 0 | -2.063574 | -0.935205 | 0.133412  |
| 25 | 7 | 0 | -0.777787 | -1.152100 | 0.275095  |
| 26 | 6 | 0 | -4.152029 | -1.747428 | -0.341176 |
| 27 | 6 | 0 | -4.194035 | -0.185992 | -0.303318 |
| 28 | 7 | 0 | -2.758006 | 0.143206  | -0.238997 |
| 29 | 1 | 0 | -2.303569 | -3.991366 | 0.884307  |
| 30 | 1 | 0 | -2.083927 | -3.618095 | -0.840184 |
| 31 | 1 | 0 | -4.991927 | -2.193585 | 0.195894  |
| 32 | 1 | 0 | -4.149657 | -2.128486 | -1.374138 |
| 33 | 1 | 0 | -2.312608 | 1.073404  | -0.286075 |
| 34 | 1 | 0 | 0.110638  | -2.966397 | -0.309223 |
| 35 | 1 | 0 | -4.676954 | 0.121730  | 0.637260  |
| 36 | 6 | 0 | -4.950090 | 0.522160  | -1.459401 |
| 37 | 6 | 0 | -4.939307 | 2.042266  | -1.186758 |
| 38 | 1 | 0 | -3.924646 | 2.453637  | -1.198153 |
| 39 | 1 | 0 | -5.516176 | 2.568518  | -1.955066 |
| 40 | 1 | 0 | -5.389619 | 2.274570  | -0.214222 |
| 41 | 6 | 0 | -6.409357 | 0.021154  | -1.458229 |
| 42 | 1 | 0 | -6.889160 | 0.183940  | -0.485438 |
| 43 | 1 | 0 | -6.995153 | 0.560478  | -2.210206 |
| 44 | 1 | 0 | -6.476372 | -1.046806 | -1.695709 |
| 45 | 6 | 0 | -4.303693 | 0.252060  | -2.832052 |
| 46 | 1 | 0 | -3.262332 | 0.586541  | -2.855525 |
| 47 | 1 | 0 | -4.325552 | -0.809644 | -3.100878 |
| 48 | 1 | 0 | -4.849209 | 0.795268  | -3.611326 |
| 49 | 6 | 0 | 0.041666  | -2.975720 | 1.839465  |
| 50 | 6 | 0 | 0.292612  | -4.497317 | 1.889329  |
| 51 | 1 | 0 | 0.797542  | -4.766664 | 2.823415  |
| 52 | 1 | 0 | -0.636933 | -5.076374 | 1.844863  |
| 53 | 1 | 0 | 0.934515  | -4.822498 | 1.061584  |
| 54 | 6 | 0 | -0.870514 | -2.554188 | 3.007138  |
| 55 | 1 | 0 | -1.064214 | -1.477121 | 2.984706  |
| 56 | 1 | 0 | -1.834678 | -3.074639 | 2.988660  |
| 57 | 1 | 0 | -0.389340 | -2.787814 | 3.963510  |
| 58 | 6 | 0 | 1.395487  | -2.246148 | 1.959526  |
| 59 | 1 | 0 | 1.888528  | -2.516339 | 2.900221  |
| 60 | 1 | 0 | 2.070113  | -2.513822 | 1.138367  |
| 61 | 1 | 0 | 1.268750  | -1.160131 | 1.942084  |
| 62 | 6 | 0 | 0.335577  | 4.862310  | 0.687776  |
| 63 | 1 | 0 | -0.630082 | 4.686375  | 0.211852  |
| 64 | 1 | 0 | 0.249089  | 5.725038  | 1.357878  |
| 65 | 1 | 0 | 1.072446  | 5.104214  | -0.085182 |
| 66 | 6 | 0 | 2.153890  | 3.896313  | 2.139886  |
| 67 | 1 | 0 | 2.079812  | 4.728736  | 2.847437  |
| 68 | 1 | 0 | 2.499065  | 3.008814  | 2.679146  |
| 69 | 1 | 0 | 2.900323  | 4.147677  | 1.380546  |

|    |   |   |           |          |          |
|----|---|---|-----------|----------|----------|
| 70 | 6 | 0 | -0.237365 | 3.217169 | 2.546458 |
| 71 | 1 | 0 | 0.089441  | 2.302863 | 3.053139 |
| 72 | 1 | 0 | -0.328290 | 4.007965 | 3.299628 |
| 73 | 1 | 0 | -1.217075 | 3.043875 | 2.099260 |

### *k*-IM0

Standard orientation:

| Center Number | Atomic Number | Atomic Type | Coordinates (Angstroms) |           |           |
|---------------|---------------|-------------|-------------------------|-----------|-----------|
|               |               |             | X                       | Y         | Z         |
| 1             | 6             | 0           | -3.196111               | -0.102822 | -1.840878 |
| 2             | 6             | 0           | -2.133348               | -1.074611 | -2.398664 |
| 3             | 8             | 0           | -4.293171               | -0.052723 | -2.598667 |
| 4             | 6             | 0           | -5.286210               | 0.939748  | -2.231241 |
| 5             | 1             | 0           | -5.670491               | 0.729166  | -1.230578 |
| 6             | 1             | 0           | -4.839417               | 1.936143  | -2.253951 |
| 7             | 1             | 0           | -6.070519               | 0.844898  | -2.980941 |
| 8             | 8             | 0           | -2.992405               | 0.581845  | -0.859391 |
| 9             | 8             | 0           | -1.020143               | -0.594733 | -2.564847 |
| 10            | 6             | 0           | -2.465115               | -2.488451 | -2.675057 |
| 11            | 6             | 0           | -3.689686               | -3.060554 | -2.287730 |
| 12            | 6             | 0           | -1.493614               | -3.287805 | -3.307076 |
| 13            | 6             | 0           | -3.937356               | -4.411705 | -2.529671 |
| 14            | 1             | 0           | -4.448067               | -2.457213 | -1.799607 |
| 15            | 6             | 0           | -1.749982               | -4.631941 | -3.557310 |
| 16            | 1             | 0           | -0.549731               | -2.835859 | -3.594980 |
| 17            | 6             | 0           | -2.971478               | -5.196106 | -3.166651 |
| 18            | 1             | 0           | -4.882568               | -4.851137 | -2.223706 |
| 19            | 1             | 0           | -1.001144               | -5.243739 | -4.052574 |
| 20            | 1             | 0           | -3.168723               | -6.247477 | -3.359294 |
| 21            | 7             | 0           | -0.836666               | 2.577845  | 0.317702  |
| 22            | 6             | 0           | 0.409622                | 2.690660  | -0.264845 |
| 23            | 7             | 0           | 0.561434                | 1.814633  | -1.304300 |
| 24            | 16            | 0           | 1.594292                | 3.801828  | 0.183340  |
| 25            | 6             | 0           | 1.804116                | 1.377319  | -1.959130 |
| 26            | 6             | 0           | 2.389154                | 0.139194  | -1.179779 |
| 27            | 6             | 0           | 3.691203                | -0.504868 | -1.745100 |
| 28            | 6             | 0           | 4.402372                | -1.206002 | -0.564778 |
| 29            | 7             | 0           | 2.443047                | 0.225147  | 0.295302  |
| 30            | 6             | 0           | 3.708386                | 0.783751  | 0.799897  |
| 31            | 6             | 0           | 4.927158                | -0.140828 | 0.440040  |
| 32            | 6             | 0           | 2.310122                | -1.149035 | 0.815732  |
| 33            | 6             | 0           | 3.380561                | -2.093502 | 0.179430  |
| 34            | 1             | 0           | -1.421066               | 1.825364  | -0.046665 |
| 35            | 1             | 0           | 1.437552                | 0.895606  | -2.877848 |
| 36            | 1             | 0           | 1.589391                | -0.592875 | -1.350024 |
| 37            | 1             | 0           | 4.364028                | 0.225989  | -2.204311 |
| 38            | 1             | 0           | 3.440847                | -1.233840 | -2.528153 |
| 39            | 1             | 0           | 3.609720                | 0.893972  | 1.885510  |
| 40            | 1             | 0           | 3.812615                | 1.791618  | 0.402323  |
| 41            | 6             | 0           | 6.198103                | 0.585251  | -0.052547 |
| 42            | 1             | 0           | 5.225591                | -0.693817 | 1.349235  |
| 43            | 1             | 0           | 2.424278                | -1.099316 | 1.904895  |
| 44            | 1             | 0           | 1.293041                | -1.507116 | 0.614784  |
| 45            | 1             | 0           | 2.916977                | -2.800198 | -0.523016 |
| 46            | 1             | 0           | 5.235756                | -1.814302 | -0.935651 |
| 47            | 1             | 0           | 3.885122                | -2.693248 | 0.948393  |
| 48            | 1             | 0           | -0.199856               | 1.161774  | -1.468484 |
| 49            | 6             | 0           | -1.503106               | 3.345233  | 1.317492  |
| 50            | 6             | 0           | -0.934432               | 4.433955  | 1.975717  |

|    |   |   |           |           |           |
|----|---|---|-----------|-----------|-----------|
| 51 | 6 | 0 | -2.809499 | 2.959578  | 1.639775  |
| 52 | 6 | 0 | -1.665772 | 5.117355  | 2.933803  |
| 53 | 1 | 0 | 0.075809  | 4.716719  | 1.716135  |
| 54 | 6 | 0 | -3.524549 | 3.650061  | 2.597781  |
| 55 | 1 | 0 | -3.251659 | 2.115672  | 1.128166  |
| 56 | 6 | 0 | -2.957766 | 4.734863  | 3.252019  |
| 57 | 1 | 0 | -1.213270 | 5.962288  | 3.438198  |
| 58 | 1 | 0 | -4.534070 | 3.339672  | 2.836512  |
| 59 | 1 | 0 | -3.519998 | 5.274314  | 4.002023  |
| 60 | 6 | 0 | 2.651135  | 2.563927  | -2.510643 |
| 61 | 6 | 0 | 3.940153  | 2.816754  | -2.185412 |
| 62 | 6 | 0 | 2.049325  | 3.411753  | -3.524422 |
| 63 | 6 | 0 | 4.650868  | 3.892125  | -2.802866 |
| 64 | 1 | 0 | 4.470882  | 2.237469  | -1.450519 |
| 65 | 6 | 0 | 2.826571  | 4.444531  | -4.077013 |
| 66 | 6 | 0 | 0.712296  | 3.257025  | -4.009826 |
| 67 | 7 | 0 | 4.157513  | 4.699617  | -3.712480 |
| 68 | 1 | 0 | 5.682776  | 4.063507  | -2.503618 |
| 69 | 6 | 0 | 2.269214  | 5.299692  | -5.079098 |
| 70 | 6 | 0 | 0.998453  | 5.124595  | -5.510513 |
| 71 | 6 | 0 | 0.208262  | 4.078506  | -4.962555 |
| 72 | 1 | 0 | 0.575544  | 5.770415  | -6.269263 |
| 73 | 1 | 0 | 2.901714  | 6.083891  | -5.475106 |
| 74 | 1 | 0 | -0.806522 | 3.943558  | -5.314632 |
| 75 | 1 | 0 | 0.091868  | 2.474594  | -3.601097 |
| 76 | 6 | 0 | 6.584951  | 1.783164  | 0.305488  |
| 77 | 1 | 0 | 6.823476  | -0.002595 | -0.716455 |
| 78 | 1 | 0 | 7.511025  | 2.209902  | -0.053827 |
| 79 | 1 | 0 | 6.010444  | 2.409090  | 0.973737  |

***k*-IM1**

Standard orientation:

| Center Number | Atomic Number | Atomic Type | Coordinates (Angstroms) |           |           |
|---------------|---------------|-------------|-------------------------|-----------|-----------|
|               |               |             | X                       | Y         | Z         |
| 1             | 6             | 0           | -0.965487               | 2.524719  | -0.630020 |
| 2             | 8             | 0           | -0.152488               | 3.030865  | 0.355607  |
| 3             | 8             | 0           | -2.192302               | 2.748840  | -0.662740 |
| 4             | 6             | 0           | -0.287122               | 1.676491  | -1.557266 |
| 5             | 6             | 0           | 3.561053                | 0.487309  | -1.415057 |
| 6             | 6             | 0           | 2.169369                | 0.780427  | -1.378585 |
| 7             | 6             | 0           | 1.038184                | 1.272364  | -1.472494 |
| 8             | 1             | 0           | -0.853486               | 1.422991  | -2.449983 |
| 9             | 6             | 0           | -0.655813               | 3.924778  | 1.394033  |
| 10            | 6             | 0           | 4.100705                | -0.389693 | -2.388319 |
| 11            | 6             | 0           | 5.463662                | -0.682394 | -2.412993 |
| 12            | 6             | 0           | 6.332570                | -0.121292 | -1.469418 |
| 13            | 6             | 0           | 5.813959                | 0.747616  | -0.501297 |
| 14            | 6             | 0           | 4.453832                | 1.049900  | -0.469452 |
| 15            | 1             | 0           | 3.435851                | -0.825103 | -3.128944 |
| 16            | 1             | 0           | 5.851269                | -1.351541 | -3.177360 |
| 17            | 1             | 0           | 7.393835                | -0.351143 | -1.492026 |
| 18            | 1             | 0           | 6.476847                | 1.199587  | 0.232508  |
| 19            | 1             | 0           | 4.062365                | 1.733276  | 0.278060  |
| 20            | 6             | 0           | -0.486467               | -3.550797 | 0.591798  |
| 21            | 6             | 0           | 0.799644                | -2.656354 | 0.564152  |
| 22            | 7             | 0           | -1.558967               | -2.553831 | 0.609468  |
| 23            | 6             | 0           | -1.067786               | -1.399597 | 0.081127  |
| 24            | 7             | 0           | 0.256076                | -1.368724 | 0.061342  |
| 25            | 6             | 0           | -2.955862               | -2.687346 | 0.186359  |

|    |   |   |           |           |           |
|----|---|---|-----------|-----------|-----------|
| 26 | 6 | 0 | -3.351933 | -1.200126 | -0.076199 |
| 27 | 7 | 0 | -2.025296 | -0.591823 | -0.346162 |
| 28 | 1 | 0 | -0.532040 | -4.197518 | 1.469546  |
| 29 | 1 | 0 | -0.555018 | -4.178342 | -0.309340 |
| 30 | 1 | 0 | -3.569964 | -3.144406 | 0.964476  |
| 31 | 1 | 0 | -3.025333 | -3.297251 | -0.726575 |
| 32 | 1 | 0 | -1.828080 | 0.361330  | -0.666763 |
| 33 | 1 | 0 | -3.743085 | -0.773270 | 0.858005  |
| 34 | 1 | 0 | 1.504979  | -3.041376 | -0.179829 |
| 35 | 1 | 0 | 0.822172  | -0.617021 | -0.364194 |
| 36 | 6 | 0 | -4.403431 | -0.945069 | -1.188611 |
| 37 | 6 | 0 | 1.568301  | -2.527386 | 1.913809  |
| 38 | 6 | 0 | 2.726305  | -1.526537 | 1.727028  |
| 39 | 1 | 0 | 2.362587  | -0.517038 | 1.515479  |
| 40 | 1 | 0 | 3.329243  | -1.477068 | 2.640097  |
| 41 | 1 | 0 | 3.389248  | -1.819361 | 0.905657  |
| 42 | 6 | 0 | 2.161043  | -3.908966 | 2.263762  |
| 43 | 1 | 0 | 2.811607  | -4.279080 | 1.462360  |
| 44 | 1 | 0 | 2.767924  | -3.835172 | 3.172125  |
| 45 | 1 | 0 | 1.388906  | -4.664067 | 2.450934  |
| 46 | 6 | 0 | 0.653065  | -2.042653 | 3.054565  |
| 47 | 1 | 0 | 0.218292  | -1.063561 | 2.829767  |
| 48 | 1 | 0 | -0.164676 | -2.742476 | 3.258345  |
| 49 | 1 | 0 | 1.234236  | -1.940295 | 3.977248  |
| 50 | 6 | 0 | -4.788410 | 0.550338  | -1.169683 |
| 51 | 1 | 0 | -3.934343 | 1.215612  | -1.334383 |
| 52 | 1 | 0 | -5.530051 | 0.753160  | -1.950163 |
| 53 | 1 | 0 | -5.236371 | 0.825685  | -0.207352 |
| 54 | 6 | 0 | -5.654483 | -1.789232 | -0.862690 |
| 55 | 1 | 0 | -6.036120 | -1.568425 | 0.141495  |
| 56 | 1 | 0 | -6.453594 | -1.560438 | -1.575232 |
| 57 | 1 | 0 | -5.458448 | -2.866083 | -0.926147 |
| 58 | 6 | 0 | -3.867161 | -1.322615 | -2.583301 |
| 59 | 1 | 0 | -2.985917 | -0.731628 | -2.849622 |
| 60 | 1 | 0 | -3.599696 | -2.383155 | -2.656348 |
| 61 | 1 | 0 | -4.637544 | -1.130200 | -3.337243 |
| 62 | 6 | 0 | -1.216739 | 5.212042  | 0.772784  |
| 63 | 1 | 0 | -2.106375 | 5.002540  | 0.177258  |
| 64 | 1 | 0 | -1.475976 | 5.923457  | 1.565687  |
| 65 | 1 | 0 | -0.463013 | 5.678111  | 0.129277  |
| 66 | 6 | 0 | 0.603225  | 4.235946  | 2.212858  |
| 67 | 1 | 0 | 0.362404  | 4.914676  | 3.038184  |
| 68 | 1 | 0 | 1.028430  | 3.317078  | 2.629362  |
| 69 | 1 | 0 | 1.362098  | 4.708193  | 1.581584  |
| 70 | 6 | 0 | -1.696677 | 3.212512  | 2.271391  |
| 71 | 1 | 0 | -1.280908 | 2.278544  | 2.667062  |
| 72 | 1 | 0 | -1.963848 | 3.850268  | 3.122146  |
| 73 | 1 | 0 | -2.598031 | 2.987201  | 1.699698  |

### *k*-TS1

Standard orientation:

| Center Number | Atomic Number | Atomic Type | Coordinates (Angstroms) |           |           |
|---------------|---------------|-------------|-------------------------|-----------|-----------|
|               |               |             | X                       | Y         | Z         |
| 1             | 6             | 0           | -2.901859               | -0.128630 | -1.837641 |
| 2             | 6             | 0           | -1.874186               | -1.196068 | -2.289890 |
| 3             | 8             | 0           | -4.109903               | -0.624964 | -1.589649 |
| 4             | 6             | 0           | -5.111654               | 0.312879  | -1.143601 |
| 5             | 1             | 0           | -4.809374               | 0.736039  | -0.182726 |
| 6             | 1             | 0           | -5.239752               | 1.108488  | -1.881660 |

|    |    |   |           |           |           |
|----|----|---|-----------|-----------|-----------|
| 7  | 1  | 0 | -6.025322 | -0.272043 | -1.039690 |
| 8  | 8  | 0 | -2.630464 | 1.058284  | -1.840618 |
| 9  | 8  | 0 | -0.847381 | -0.759643 | -2.792238 |
| 10 | 6  | 0 | -2.164202 | -2.654111 | -2.237745 |
| 11 | 6  | 0 | -2.935844 | -3.255531 | -1.228756 |
| 12 | 6  | 0 | -1.597484 | -3.455137 | -3.246449 |
| 13 | 6  | 0 | -3.136757 | -4.636065 | -1.239264 |
| 14 | 1  | 0 | -3.328957 | -2.645935 | -0.425280 |
| 15 | 6  | 0 | -1.817940 | -4.830980 | -3.262113 |
| 16 | 1  | 0 | -0.997292 | -2.982904 | -4.018601 |
| 17 | 6  | 0 | -2.588638 | -5.424141 | -2.256164 |
| 18 | 1  | 0 | -3.720133 | -5.099352 | -0.447769 |
| 19 | 1  | 0 | -1.391228 | -5.439621 | -4.055122 |
| 20 | 1  | 0 | -2.758214 | -6.498099 | -2.263424 |
| 21 | 7  | 0 | -1.089907 | 2.912962  | -0.077085 |
| 22 | 6  | 0 | 0.236809  | 2.596097  | -0.243858 |
| 23 | 7  | 0 | 0.412429  | 1.685977  | -1.256213 |
| 24 | 16 | 0 | 1.503836  | 3.208588  | 0.686880  |
| 25 | 6  | 0 | 1.631953  | 1.357084  | -2.007174 |
| 26 | 6  | 0 | 2.217533  | -0.069329 | -1.643275 |
| 27 | 6  | 0 | 3.641733  | -0.375280 | -2.196545 |
| 28 | 6  | 0 | 4.357612  | -1.344805 | -1.235046 |
| 29 | 7  | 0 | 2.135742  | -0.560804 | -0.222346 |
| 30 | 6  | 0 | 3.248319  | -0.067232 | 0.634446  |
| 31 | 6  | 0 | 4.604432  | -0.671599 | 0.147878  |
| 32 | 6  | 0 | 2.181609  | -2.063855 | -0.260991 |
| 33 | 6  | 0 | 3.439641  | -2.557993 | -1.011922 |
| 34 | 1  | 0 | -1.725808 | 2.423595  | -0.709164 |
| 35 | 1  | 0 | 1.242380  | 1.123902  | -3.004106 |
| 36 | 1  | 0 | 1.513529  | -0.735467 | -2.147875 |
| 37 | 1  | 0 | 4.234522  | 0.532464  | -2.322175 |
| 38 | 1  | 0 | 3.555383  | -0.831191 | -3.190729 |
| 39 | 1  | 0 | 3.016632  | -0.359104 | 1.663539  |
| 40 | 1  | 0 | 3.219482  | 1.020509  | 0.598790  |
| 41 | 6  | 0 | 5.793957  | 0.311781  | 0.149134  |
| 42 | 1  | 0 | 4.882926  | -1.488400 | 0.836760  |
| 43 | 1  | 0 | 2.156595  | -2.399037 | 0.778335  |
| 44 | 1  | 0 | 1.254324  | -2.407916 | -0.727292 |
| 45 | 1  | 0 | 3.169062  | -3.008785 | -1.974881 |
| 46 | 1  | 0 | 5.312331  | -1.662408 | -1.668687 |
| 47 | 1  | 0 | 3.951458  | -3.331675 | -0.427186 |
| 48 | 1  | 0 | -0.434192 | 1.311468  | -1.681682 |
| 49 | 6  | 0 | -1.771192 | 3.782411  | 0.824442  |
| 50 | 6  | 0 | -1.145050 | 4.539442  | 1.812333  |
| 51 | 6  | 0 | -3.160571 | 3.868476  | 0.676957  |
| 52 | 6  | 0 | -1.902409 | 5.360556  | 2.632827  |
| 53 | 1  | 0 | -0.072341 | 4.465064  | 1.914630  |
| 54 | 6  | 0 | -3.901151 | 4.691028  | 1.501627  |
| 55 | 1  | 0 | -3.646954 | 3.283723  | -0.091822 |
| 56 | 6  | 0 | -3.276419 | 5.443504  | 2.486708  |
| 57 | 1  | 0 | -1.404690 | 5.943704  | 3.397828  |
| 58 | 1  | 0 | -4.975061 | 4.746771  | 1.374892  |
| 59 | 1  | 0 | -3.858143 | 6.087702  | 3.131948  |
| 60 | 6  | 0 | 2.530033  | 2.604246  | -2.269159 |
| 61 | 6  | 0 | 3.723943  | 2.844183  | -1.679001 |
| 62 | 6  | 0 | 2.059637  | 3.578417  | -3.234944 |
| 63 | 6  | 0 | 4.488434  | 4.001180  | -2.024397 |
| 64 | 1  | 0 | 4.134500  | 2.188688  | -0.929448 |
| 65 | 6  | 0 | 2.880956  | 4.686032  | -3.512834 |
| 66 | 6  | 0 | 0.806116  | 3.495835  | -3.921643 |
| 67 | 7  | 0 | 4.125552  | 4.905189  | -2.904462 |
| 68 | 1  | 0 | 5.445652  | 4.152119  | -1.530300 |

|    |    |   |           |           |           |
|----|----|---|-----------|-----------|-----------|
| 69 | 6  | 0 | 2.459242  | 5.669146  | -4.462781 |
| 70 | 6  | 0 | 1.269380  | 5.553122  | -5.096729 |
| 71 | 6  | 0 | 0.427964  | 4.442796  | -4.813990 |
| 72 | 1  | 0 | 0.946791  | 6.296841  | -5.814048 |
| 73 | 1  | 0 | 3.124839  | 6.502691  | -4.647788 |
| 74 | 1  | 0 | -0.526405 | 4.360878  | -5.318913 |
| 75 | 1  | 0 | 0.139431  | 2.671289  | -3.719559 |
| 76 | 6  | 0 | 5.943044  | 1.333681  | 0.952891  |
| 77 | 1  | 0 | 6.576227  | 0.064745  | -0.560206 |
| 78 | 1  | 0 | 6.828923  | 1.952850  | 0.918120  |
| 79 | 1  | 0 | 5.203257  | 1.617666  | 1.688695  |
| 80 | 1  | 0 | 0.971621  | -0.413207 | 0.368500  |
| 81 | 15 | 0 | -0.542576 | -0.716448 | 1.211678  |
| 82 | 8  | 0 | -0.208913 | -2.197494 | 1.916847  |
| 83 | 6  | 0 | -1.162415 | -2.829104 | 2.775904  |
| 84 | 1  | 0 | -2.148655 | -2.879742 | 2.300042  |
| 85 | 1  | 0 | -1.241252 | -2.288650 | 3.727529  |
| 86 | 1  | 0 | -0.799764 | -3.842788 | 2.969501  |
| 87 | 8  | 0 | -0.655181 | 0.275618  | 2.534361  |
| 88 | 6  | 0 | -1.898365 | 0.740959  | 3.066077  |
| 89 | 1  | 0 | -2.669930 | 0.772435  | 2.290412  |
| 90 | 1  | 0 | -2.231950 | 0.085354  | 3.880991  |
| 91 | 1  | 0 | -1.722673 | 1.745530  | 3.461149  |
| 92 | 8  | 0 | -1.895794 | -0.775366 | 0.501102  |

### *k*-IM2

Standard orientation:

| Center Number | Atomic Number | Atomic Type | Coordinates (Angstroms) |           |           |
|---------------|---------------|-------------|-------------------------|-----------|-----------|
|               |               |             | X                       | Y         | Z         |
| 1             | 6             | 0           | -2.740563               | -0.138779 | -1.775506 |
| 2             | 6             | 0           | -1.755138               | -1.281482 | -2.095770 |
| 3             | 8             | 0           | -4.006315               | -0.536893 | -1.679780 |
| 4             | 6             | 0           | -4.979097               | 0.477135  | -1.362690 |
| 5             | 1             | 0           | -4.779414               | 0.873089  | -0.363837 |
| 6             | 1             | 0           | -4.943446               | 1.282740  | -2.100319 |
| 7             | 1             | 0           | -5.942857               | -0.031458 | -1.389202 |
| 8             | 8             | 0           | -2.389773               | 1.032124  | -1.782285 |
| 9             | 8             | 0           | -0.640729               | -0.933475 | -2.474806 |
| 10            | 6             | 0           | -2.178141               | -2.710002 | -2.133725 |
| 11            | 6             | 0           | -3.115392               | -3.271153 | -1.249958 |
| 12            | 6             | 0           | -1.579252               | -3.523323 | -3.112660 |
| 13            | 6             | 0           | -3.443441               | -4.623140 | -1.352882 |
| 14            | 1             | 0           | -3.537033               | -2.654175 | -0.467140 |
| 15            | 6             | 0           | -1.923671               | -4.869945 | -3.221783 |
| 16            | 1             | 0           | -0.853650               | -3.083132 | -3.790342 |
| 17            | 6             | 0           | -2.857111               | -5.423036 | -2.339254 |
| 18            | 1             | 0           | -4.156811               | -5.056145 | -0.656187 |
| 19            | 1             | 0           | -1.466820               | -5.485944 | -3.992250 |
| 20            | 1             | 0           | -3.124692               | -6.474002 | -2.418469 |
| 21            | 7             | 0           | -0.947230               | 2.958036  | -0.030076 |
| 22            | 6             | 0           | 0.369825                | 2.687165  | -0.279381 |
| 23            | 7             | 0           | 0.515147                | 1.764163  | -1.286507 |
| 24            | 16            | 0           | 1.679117                | 3.369956  | 0.544915  |
| 25            | 6             | 0           | 1.710369                | 1.416006  | -2.059463 |
| 26            | 6             | 0           | 2.306776                | 0.021914  | -1.611880 |
| 27            | 6             | 0           | 3.716414                | -0.370926 | -2.122763 |
| 28            | 6             | 0           | 4.390380                | -1.293040 | -1.085617 |
| 29            | 7             | 0           | 2.237632                | -0.327865 | -0.131296 |
| 30            | 6             | 0           | 3.389253                | 0.206329  | 0.674161  |



|    |    |   |           |           |           |
|----|----|---|-----------|-----------|-----------|
| 31 | 6  | 0 | 4.695472  | -0.510671 | 0.225855  |
| 32 | 6  | 0 | 2.197938  | -1.840658 | -0.010475 |
| 33 | 6  | 0 | 3.418874  | -2.436335 | -0.742841 |
| 34 | 1  | 0 | -1.603681 | 2.438010  | -0.616277 |
| 35 | 1  | 0 | 1.294885  | 1.115087  | -3.028297 |
| 36 | 1  | 0 | 1.583317  | -0.681078 | -2.026642 |
| 37 | 1  | 0 | 4.342448  | 0.502630  | -2.311510 |
| 38 | 1  | 0 | 3.611550  | -0.895002 | -3.079828 |
| 39 | 1  | 0 | 3.146048  | 0.026309  | 1.723996  |
| 40 | 1  | 0 | 3.396133  | 1.283192  | 0.520931  |
| 41 | 6  | 0 | 5.927108  | 0.411672  | 0.114743  |
| 42 | 1  | 0 | 4.944991  | -1.272868 | 0.983593  |
| 43 | 1  | 0 | 2.175431  | -2.060994 | 1.057865  |
| 44 | 1  | 0 | 1.243819  | -2.167858 | -0.423702 |
| 45 | 1  | 0 | 3.104640  | -2.952156 | -1.657780 |
| 46 | 1  | 0 | 5.320391  | -1.697901 | -1.497949 |
| 47 | 1  | 0 | 3.907885  | -3.181518 | -0.105641 |
| 48 | 1  | 0 | -0.339918 | 1.321078  | -1.627956 |
| 49 | 6  | 0 | -1.601835 | 3.757427  | 0.956703  |
| 50 | 6  | 0 | -0.942041 | 4.519012  | 1.917709  |
| 51 | 6  | 0 | -3.000663 | 3.766218  | 0.919009  |
| 52 | 6  | 0 | -1.676717 | 5.268484  | 2.823498  |
| 53 | 1  | 0 | 0.137481  | 4.506456  | 1.935905  |
| 54 | 6  | 0 | -3.718484 | 4.518343  | 1.826783  |
| 55 | 1  | 0 | -3.512812 | 3.175515  | 0.171856  |
| 56 | 6  | 0 | -3.060128 | 5.275438  | 2.786404  |
| 57 | 1  | 0 | -1.153317 | 5.855467  | 3.568049  |
| 58 | 1  | 0 | -4.800466 | 4.514153  | 1.786253  |
| 59 | 1  | 0 | -3.624042 | 5.864113  | 3.497321  |
| 60 | 6  | 0 | 2.597015  | 2.644880  | -2.419015 |
| 61 | 6  | 0 | 3.824851  | 2.900597  | -1.911158 |
| 62 | 6  | 0 | 2.074000  | 3.575994  | -3.399284 |
| 63 | 6  | 0 | 4.572525  | 4.035861  | -2.352610 |
| 64 | 1  | 0 | 4.276725  | 2.279363  | -1.156349 |
| 65 | 6  | 0 | 2.882148  | 4.664520  | -3.774045 |
| 66 | 6  | 0 | 0.782635  | 3.467937  | -4.007038 |
| 67 | 7  | 0 | 4.161350  | 4.901492  | -3.249512 |
| 68 | 1  | 0 | 5.557803  | 4.202301  | -1.922987 |
| 69 | 6  | 0 | 2.409226  | 5.606415  | -4.741195 |
| 70 | 6  | 0 | 1.183762  | 5.468137  | -5.298693 |
| 71 | 6  | 0 | 0.356575  | 4.376366  | -4.917901 |
| 72 | 1  | 0 | 0.821945  | 6.180798  | -6.028855 |
| 73 | 1  | 0 | 3.065384  | 6.427051  | -5.002094 |
| 74 | 1  | 0 | -0.626009 | 4.277603  | -5.362255 |
| 75 | 1  | 0 | 0.126175  | 2.657858  | -3.727522 |
| 76 | 6  | 0 | 6.118666  | 1.524352  | 0.776047  |
| 77 | 1  | 0 | 6.699669  | 0.033283  | -0.544997 |
| 78 | 1  | 0 | 7.033923  | 2.090331  | 0.667453  |
| 79 | 1  | 0 | 5.391527  | 1.940311  | 1.460274  |
| 80 | 1  | 0 | 1.317840  | -0.008809 | 0.275843  |
| 81 | 15 | 0 | -0.788853 | -0.650918 | 1.260212  |
| 82 | 8  | 0 | -0.319613 | -2.120744 | 1.985922  |
| 83 | 6  | 0 | -1.266966 | -2.977867 | 2.621715  |
| 84 | 1  | 0 | -2.190140 | -3.051231 | 2.034729  |
| 85 | 1  | 0 | -1.503302 | -2.613469 | 3.630517  |
| 86 | 1  | 0 | -0.812644 | -3.971528 | 2.703583  |
| 87 | 8  | 0 | -1.283539 | 0.240848  | 2.601776  |
| 88 | 6  | 0 | -2.630744 | 0.262633  | 3.069564  |
| 89 | 1  | 0 | -3.338672 | 0.143607  | 2.241598  |
| 90 | 1  | 0 | -2.803882 | -0.537338 | 3.802736  |
| 91 | 1  | 0 | -2.789111 | 1.229606  | 3.559031  |
| 92 | 8  | 0 | -2.079971 | -0.961273 | 0.452316  |

-----  
***ds-IM3***

Standard orientation:

| Center<br>Number | Atomic<br>Number | Atomic<br>Type | Coordinates (Angstroms) |           |           |
|------------------|------------------|----------------|-------------------------|-----------|-----------|
|                  |                  |                | X                       | Y         | Z         |
| 1                | 7                | 0              | -0.250773               | 2.719199  | -0.163153 |
| 2                | 6                | 0              | -1.171115               | 1.729251  | -0.386870 |
| 3                | 7                | 0              | -0.861508               | 0.580865  | 0.289390  |
| 4                | 16               | 0              | -2.531506               | 1.864586  | -1.390737 |
| 5                | 6                | 0              | -0.133665               | 4.057656  | -0.644039 |
| 6                | 6                | 0              | -1.681146               | -0.622451 | 0.463045  |
| 7                | 6                | 0              | -1.875555               | -1.422360 | -0.845434 |
| 8                | 6                | 0              | -2.682744               | -2.733403 | -0.666195 |
| 9                | 6                | 0              | -2.065239               | -3.846861 | -1.534742 |
| 10               | 7                | 0              | -0.545696               | -1.802034 | -1.477623 |
| 11               | 6                | 0              | -0.796116               | -2.183129 | -2.913598 |
| 12               | 6                | 0              | -1.846389               | -3.325699 | -2.987082 |
| 13               | 6                | 0              | 0.139234                | -2.941780 | -0.769481 |
| 14               | 6                | 0              | -0.699494               | -4.228575 | -0.935447 |
| 15               | 1                | 0              | 0.515715                | 2.452051  | 0.457331  |
| 16               | 6                | 0              | -3.001985               | -0.323551 | 1.233868  |
| 17               | 1                | 0              | -1.069685               | -1.248120 | 1.116765  |
| 18               | 1                | 0              | -3.726148               | -2.563609 | -0.946091 |
| 19               | 1                | 0              | -2.682925               | -3.048079 | 0.386590  |
| 20               | 1                | 0              | 0.171457                | -2.480898 | -3.321545 |
| 21               | 1                | 0              | -1.097903               | -1.270649 | -3.426082 |
| 22               | 6                | 0              | -3.188065               | -3.008940 | -3.679910 |
| 23               | 1                | 0              | -1.398992               | -4.155989 | -3.556412 |
| 24               | 1                | 0              | 1.134183                | -3.018030 | -1.212774 |
| 25               | 1                | 0              | 0.272526                | -2.648273 | 0.272628  |
| 26               | 1                | 0              | -0.835580               | -4.716055 | 0.036671  |
| 27               | 1                | 0              | -2.726728               | -4.719528 | -1.552452 |
| 28               | 1                | 0              | -0.185611               | -4.947056 | -1.585353 |
| 29               | 1                | 0              | -0.015851               | 0.592820  | 0.859233  |
| 30               | 6                | 0              | -1.044068               | 4.664238  | -1.505975 |
| 31               | 6                | 0              | -0.840987               | 5.975007  | -1.908432 |
| 32               | 6                | 0              | 0.255153                | 6.694856  | -1.465702 |
| 33               | 6                | 0              | 1.162717                | 6.091043  | -0.605977 |
| 34               | 6                | 0              | 0.974145                | 4.786455  | -0.196400 |
| 35               | 1                | 0              | -1.554923               | 6.436531  | -2.579436 |
| 36               | 1                | 0              | 0.404689                | 7.717139  | -1.785722 |
| 37               | 1                | 0              | 2.025139                | 6.641993  | -0.252292 |
| 38               | 1                | 0              | 1.682049                | 4.315410  | 0.471937  |
| 39               | 1                | 0              | -1.894139               | 4.089455  | -1.843402 |
| 40               | 1                | 0              | 0.190370                | -1.006624 | -1.521284 |
| 41               | 6                | 0              | -2.957903               | -0.135076 | 2.667477  |
| 42               | 6                | 0              | -4.165511               | 0.145031  | 3.331602  |
| 43               | 7                | 0              | -5.403192               | 0.257106  | 2.680489  |
| 44               | 6                | 0              | -5.376041               | 0.090181  | 1.378151  |
| 45               | 6                | 0              | -4.200320               | -0.199369 | 0.617651  |
| 46               | 6                | 0              | -1.764585               | -0.210113 | 3.453909  |
| 47               | 1                | 0              | -4.303037               | -0.299909 | -0.452114 |
| 48               | 6                | 0              | -3.590773               | -1.875011 | -4.191855 |
| 49               | 1                | 0              | -4.560795               | -1.791567 | -4.662521 |
| 50               | 1                | 0              | -3.003050               | -0.968089 | -4.185112 |
| 51               | 1                | 0              | -3.838086               | -3.875788 | -3.729664 |
| 52               | 1                | 0              | -2.349110               | -0.770936 | -1.578522 |
| 53               | 6                | 0              | -4.171597               | 0.335630  | 4.749290  |
| 54               | 6                | 0              | -3.023599               | 0.254694  | 5.461643  |

|    |    |   |           |           |           |
|----|----|---|-----------|-----------|-----------|
| 55 | 6  | 0 | -1.798341 | -0.022451 | 4.795546  |
| 56 | 1  | 0 | -6.323632 | 0.180237  | 0.851547  |
| 57 | 1  | 0 | -5.122129 | 0.547693  | 5.222135  |
| 58 | 1  | 0 | -3.024641 | 0.400524  | 6.534289  |
| 59 | 1  | 0 | -0.885130 | -0.080978 | 5.374424  |
| 60 | 1  | 0 | -0.818821 | -0.414674 | 2.973354  |
| 61 | 6  | 0 | 2.698954  | 0.636587  | 1.791564  |
| 62 | 6  | 0 | 2.403151  | -0.872458 | 1.947871  |
| 63 | 8  | 0 | 1.799786  | 1.443811  | 1.611952  |
| 64 | 8  | 0 | 1.214729  | -1.178371 | 1.999958  |
| 65 | 8  | 0 | 3.970186  | 0.965840  | 2.007572  |
| 66 | 6  | 0 | 4.323172  | 2.350326  | 1.782286  |
| 67 | 1  | 0 | 4.167448  | 2.586234  | 0.726424  |
| 68 | 1  | 0 | 3.718009  | 3.001114  | 2.417894  |
| 69 | 1  | 0 | 5.377991  | 2.420253  | 2.047454  |
| 70 | 6  | 0 | 3.474036  | -1.880226 | 2.191650  |
| 71 | 6  | 0 | 4.769823  | -1.805660 | 1.652059  |
| 72 | 6  | 0 | 5.697942  | -2.809914 | 1.925157  |
| 73 | 6  | 0 | 5.354431  | -3.888019 | 2.747027  |
| 74 | 6  | 0 | 3.130677  | -2.977592 | 3.003809  |
| 75 | 6  | 0 | 4.067344  | -3.969365 | 3.288537  |
| 76 | 1  | 0 | 5.035098  | -0.989810 | 0.992117  |
| 77 | 1  | 0 | 6.690768  | -2.753467 | 1.486963  |
| 78 | 1  | 0 | 6.085525  | -4.663753 | 2.961401  |
| 79 | 1  | 0 | 3.795211  | -4.803080 | 3.930761  |
| 80 | 1  | 0 | 2.127589  | -3.031463 | 3.416051  |
| 81 | 8  | 0 | 1.518526  | -0.312620 | -1.951837 |
| 82 | 15 | 0 | 2.856171  | -0.187554 | -1.163232 |
| 83 | 8  | 0 | 3.963807  | -1.196537 | -1.934475 |
| 84 | 6  | 0 | 4.143967  | -1.169356 | -3.351753 |
| 85 | 1  | 0 | 4.690799  | -2.076737 | -3.628177 |
| 86 | 1  | 0 | 4.735458  | -0.293847 | -3.648914 |
| 87 | 1  | 0 | 3.179678  | -1.150866 | -3.874450 |
| 88 | 8  | 0 | 3.456752  | 1.345975  | -1.562042 |
| 89 | 6  | 0 | 2.950323  | 2.106260  | -2.665056 |
| 90 | 1  | 0 | 3.449302  | 1.818273  | -3.599698 |
| 91 | 1  | 0 | 1.871303  | 1.964436  | -2.777642 |
| 92 | 1  | 0 | 3.168825  | 3.158998  | -2.457360 |

## ds-TS2

Standard orientation:

| Center<br>Number | Atomic<br>Number | Atomic<br>Type | Coordinates (Angstroms) |           |           |
|------------------|------------------|----------------|-------------------------|-----------|-----------|
|                  |                  |                | X                       | Y         | Z         |
| 1                | 7                | 0              | -0.242608               | 2.582350  | -0.205563 |
| 2                | 6                | 0              | -1.196398               | 1.623509  | -0.406401 |
| 3                | 7                | 0              | -0.897529               | 0.460708  | 0.245727  |
| 4                | 16               | 0              | -2.591597               | 1.804130  | -1.361957 |
| 5                | 6                | 0              | -0.065905               | 3.894135  | -0.738684 |
| 6                | 6                | 0              | -1.754304               | -0.706182 | 0.461943  |
| 7                | 6                | 0              | -2.001497               | -1.497495 | -0.840494 |
| 8                | 6                | 0              | -2.876682               | -2.764525 | -0.696521 |
| 9                | 6                | 0              | -2.315364               | -3.884272 | -1.596529 |
| 10               | 7                | 0              | -0.676360               | -1.945563 | -1.449176 |
| 11               | 6                | 0              | -0.908060               | -2.267495 | -2.903015 |
| 12               | 6                | 0              | -2.035151               | -3.330072 | -3.027879 |
| 13               | 6                | 0              | -0.078729               | -3.146596 | -0.756352 |
| 14               | 6                | 0              | -0.989187               | -4.371781 | -0.986427 |
| 15               | 1                | 0              | 0.511596                | 2.306460  | 0.431756  |
| 16               | 6                | 0              | -3.028124               | -0.361130 | 1.283426  |

|    |   |   |           |           |           |
|----|---|---|-----------|-----------|-----------|
| 17 | 1 | 0 | -1.138662 | -1.348867 | 1.096063  |
| 18 | 1 | 0 | -3.907434 | -2.528853 | -0.974493 |
| 19 | 1 | 0 | -2.897563 | -3.107817 | 0.346986  |
| 20 | 1 | 0 | 0.046778  | -2.623994 | -3.293360 |
| 21 | 1 | 0 | -1.134179 | -1.323971 | -3.397888 |
| 22 | 6 | 0 | -3.339011 | -2.897935 | -3.729956 |
| 23 | 1 | 0 | -1.635424 | -4.170248 | -3.617527 |
| 24 | 1 | 0 | 0.920717  | -3.262111 | -1.177959 |
| 25 | 1 | 0 | 0.049970  | -2.880625 | 0.292795  |
| 26 | 1 | 0 | -1.175365 | -4.884017 | -0.035678 |
| 27 | 1 | 0 | -3.029695 | -4.711885 | -1.657625 |
| 28 | 1 | 0 | -0.506651 | -5.097482 | -1.652300 |
| 29 | 1 | 0 | 0.005609  | 0.371366  | 0.724362  |
| 30 | 6 | 0 | -0.951006 | 4.508253  | -1.621254 |
| 31 | 6 | 0 | -0.686920 | 5.789729  | -2.079159 |
| 32 | 6 | 0 | 0.445152  | 6.472729  | -1.670535 |
| 33 | 6 | 0 | 1.327175  | 5.861500  | -0.789296 |
| 34 | 6 | 0 | 1.078832  | 4.585584  | -0.325269 |
| 35 | 1 | 0 | -1.381668 | 6.257646  | -2.765637 |
| 36 | 1 | 0 | 0.642042  | 7.472638  | -2.032849 |
| 37 | 1 | 0 | 2.216865  | 6.384616  | -0.461938 |
| 38 | 1 | 0 | 1.765487  | 4.105999  | 0.359185  |
| 39 | 1 | 0 | -1.831464 | 3.963143  | -1.928802 |
| 40 | 1 | 0 | 0.075296  | -1.205415 | -1.418657 |
| 41 | 6 | 0 | -2.904201 | -0.155658 | 2.709682  |
| 42 | 6 | 0 | -4.069568 | 0.155772  | 3.432097  |
| 43 | 7 | 0 | -5.336776 | 0.286418  | 2.843719  |
| 44 | 6 | 0 | -5.380461 | 0.108042  | 1.543321  |
| 45 | 6 | 0 | -4.252277 | -0.215246 | 0.726270  |
| 46 | 6 | 0 | -1.670791 | -0.241883 | 3.430862  |
| 47 | 1 | 0 | -4.410352 | -0.323792 | -0.336046 |
| 48 | 6 | 0 | -3.654649 | -1.722124 | -4.207331 |
| 49 | 1 | 0 | -4.608462 | -1.556896 | -4.689499 |
| 50 | 1 | 0 | -3.008190 | -0.857286 | -4.158918 |
| 51 | 1 | 0 | -4.044611 | -3.716521 | -3.820614 |
| 52 | 1 | 0 | -2.425742 | -0.815319 | -1.576834 |
| 53 | 6 | 0 | -3.996912 | 0.361494  | 4.845766  |
| 54 | 6 | 0 | -2.813867 | 0.266986  | 5.496599  |
| 55 | 6 | 0 | -1.630050 | -0.038028 | 4.770004  |
| 56 | 1 | 0 | -6.351980 | 0.214020  | 1.065568  |
| 57 | 1 | 0 | -4.916611 | 0.596645  | 5.366194  |
| 58 | 1 | 0 | -2.755175 | 0.424715  | 6.565988  |
| 59 | 1 | 0 | -0.687968 | -0.103525 | 5.299835  |
| 60 | 1 | 0 | -0.754335 | -0.461759 | 2.901364  |
| 61 | 6 | 0 | 2.809537  | 0.846817  | 1.626561  |
| 62 | 6 | 0 | 2.488558  | -0.632757 | 1.348649  |
| 63 | 8 | 0 | 1.953597  | 1.716883  | 1.582050  |
| 64 | 8 | 0 | 1.263983  | -0.926248 | 1.388148  |
| 65 | 8 | 0 | 4.082901  | 1.090722  | 1.957030  |
| 66 | 6 | 0 | 4.441331  | 2.474760  | 2.143869  |
| 67 | 1 | 0 | 4.306053  | 3.019599  | 1.206000  |
| 68 | 1 | 0 | 3.826171  | 2.924327  | 2.927171  |
| 69 | 1 | 0 | 5.491711  | 2.460701  | 2.435800  |
| 70 | 6 | 0 | 3.506664  | -1.699942 | 1.704562  |
| 71 | 6 | 0 | 4.878768  | -1.635180 | 1.410633  |
| 72 | 6 | 0 | 5.735809  | -2.664624 | 1.800907  |
| 73 | 6 | 0 | 5.242503  | -3.776045 | 2.493427  |
| 74 | 6 | 0 | 3.020721  | -2.821566 | 2.395777  |
| 75 | 6 | 0 | 3.879705  | -3.849996 | 2.790549  |
| 76 | 1 | 0 | 5.276044  | -0.790983 | 0.859922  |
| 77 | 1 | 0 | 6.793837  | -2.600083 | 1.558295  |
| 78 | 1 | 0 | 5.915125  | -4.574620 | 2.797076  |

|    |    |   |          |           |           |
|----|----|---|----------|-----------|-----------|
| 79 | 1  | 0 | 3.483943 | -4.704905 | 3.334017  |
| 80 | 1  | 0 | 1.961603 | -2.866538 | 2.628258  |
| 81 | 8  | 0 | 1.669530 | -0.746912 | -1.821513 |
| 82 | 15 | 0 | 2.915706 | -0.266906 | -1.065525 |
| 83 | 8  | 0 | 4.259098 | -0.928059 | -1.816537 |
| 84 | 6  | 0 | 4.247597 | -2.294184 | -2.233599 |
| 85 | 1  | 0 | 5.195890 | -2.470115 | -2.749061 |
| 86 | 1  | 0 | 3.416505 | -2.485209 | -2.921797 |
| 87 | 1  | 0 | 4.178881 | -2.973736 | -1.374359 |
| 88 | 8  | 0 | 3.242535 | 1.315014  | -1.385654 |
| 89 | 6  | 0 | 3.212202 | 1.811261  | -2.736985 |
| 90 | 1  | 0 | 4.035290 | 1.381704  | -3.317809 |
| 91 | 1  | 0 | 2.255098 | 1.572607  | -3.211246 |
| 92 | 1  | 0 | 3.331281 | 2.895376  | -2.669892 |

### *ds-IM4*

Standard orientation:

| Center Number | Atomic Number | Atomic Type | Coordinates (Angstroms) |           |           |
|---------------|---------------|-------------|-------------------------|-----------|-----------|
|               |               |             | X                       | Y         | Z         |
| 1             | 7             | 0           | -0.539457               | 2.946336  | -0.867832 |
| 2             | 6             | 0           | -1.422025               | 1.902105  | -0.747294 |
| 3             | 7             | 0           | -0.808950               | 0.763635  | -0.319304 |
| 4             | 16            | 0           | -3.082027               | 1.970755  | -1.104776 |
| 5             | 6             | 0           | -0.684210               | 4.283647  | -1.340797 |
| 6             | 6             | 0           | -1.402752               | -0.515407 | 0.084909  |
| 7             | 6             | 0           | -1.998475               | -1.226309 | -1.141136 |
| 8             | 6             | 0           | -2.742833               | -2.555678 | -0.910724 |
| 9             | 6             | 0           | -2.410213               | -3.527864 | -2.063042 |
| 10            | 7             | 0           | -0.841692               | -1.529620 | -2.110085 |
| 11            | 6             | 0           | -1.418318               | -1.703932 | -3.488262 |
| 12            | 6             | 0           | -2.522422               | -2.800652 | -3.441666 |
| 13            | 6             | 0           | -0.055660               | -2.763091 | -1.723631 |
| 14            | 6             | 0           | -0.958282               | -4.004289 | -1.879700 |
| 15            | 1             | 0           | 0.420420                | 2.724949  | -0.590071 |
| 16            | 6             | 0           | -2.250102               | -0.384265 | 1.371117  |
| 17            | 1             | 0           | -0.528672               | -1.099458 | 0.366168  |
| 18            | 1             | 0           | -3.817705               | -2.359004 | -0.864773 |
| 19            | 1             | 0           | -2.457297               | -3.007298 | 0.048552  |
| 20            | 1             | 0           | -0.590553               | -1.981771 | -4.144914 |
| 21            | 1             | 0           | -1.785815               | -0.728544 | -3.804826 |
| 22            | 6             | 0           | -3.970757               | -2.355949 | -3.730248 |
| 23            | 1             | 0           | -2.273598               | -3.550112 | -4.209369 |
| 24            | 1             | 0           | 0.819366                | -2.779782 | -2.375135 |
| 25            | 1             | 0           | 0.311168                | -2.600959 | -0.709689 |
| 26            | 1             | 0           | -0.874663               | -4.637778 | -0.989754 |
| 27            | 1             | 0           | -3.093539               | -4.383084 | -2.046893 |
| 28            | 1             | 0           | -0.643824               | -4.611590 | -2.737338 |
| 29            | 1             | 0           | 0.198055                | 0.762025  | -0.156114 |
| 30            | 6             | 0           | -1.885371               | 4.833427  | -1.782572 |
| 31            | 6             | 0           | -1.918872               | 6.146737  | -2.224344 |
| 32            | 6             | 0           | -0.774352               | 6.925069  | -2.232725 |
| 33            | 6             | 0           | 0.422775                | 6.378295  | -1.790462 |
| 34            | 6             | 0           | 0.472733                | 5.071658  | -1.348278 |
| 35            | 1             | 0           | -2.858223               | 6.564251  | -2.565363 |
| 36            | 1             | 0           | -0.811050               | 7.949212  | -2.578508 |
| 37            | 1             | 0           | 1.325359                | 6.976488  | -1.790272 |
| 38            | 1             | 0           | 1.404339                | 4.644464  | -1.001988 |
| 39            | 1             | 0           | -2.770090               | 4.213449  | -1.766290 |
| 40            | 1             | 0           | -0.149022               | -0.749241 | -2.115219 |

|    |    |   |           |           |           |
|----|----|---|-----------|-----------|-----------|
| 41 | 6  | 0 | -1.544152 | -0.264002 | 2.630215  |
| 42 | 6  | 0 | -2.330200 | -0.115062 | 3.788728  |
| 43 | 7  | 0 | -3.734686 | -0.081689 | 3.782249  |
| 44 | 6  | 0 | -4.306182 | -0.190041 | 2.605408  |
| 45 | 6  | 0 | -3.601324 | -0.339234 | 1.371493  |
| 46 | 6  | 0 | -0.111348 | -0.282959 | 2.756988  |
| 47 | 1  | 0 | -4.172376 | -0.397415 | 0.456973  |
| 48 | 6  | 0 | -4.421941 | -1.151368 | -3.965769 |
| 49 | 1  | 0 | -5.471568 | -0.981542 | -4.163417 |
| 50 | 1  | 0 | -3.803520 | -0.264954 | -3.978909 |
| 51 | 1  | 0 | -4.659442 | -3.193539 | -3.735345 |
| 52 | 1  | 0 | -2.635090 | -0.525931 | -1.681742 |
| 53 | 6  | 0 | -1.699175 | 0.012819  | 5.064255  |
| 54 | 6  | 0 | -0.349618 | -0.005805 | 5.160389  |
| 55 | 6  | 0 | 0.442962  | -0.156559 | 3.989684  |
| 56 | 1  | 0 | -5.393260 | -0.160511 | 2.582312  |
| 57 | 1  | 0 | -2.334730 | 0.124892  | 5.932537  |
| 58 | 1  | 0 | 0.135324  | 0.091762  | 6.123862  |
| 59 | 1  | 0 | 1.520840  | -0.170588 | 4.093252  |
| 60 | 1  | 0 | 0.572154  | -0.410119 | 1.872412  |
| 61 | 6  | 0 | 2.692712  | 1.290251  | 0.750555  |
| 62 | 6  | 0 | 2.726970  | -0.194524 | 0.316391  |
| 63 | 8  | 0 | 2.226560  | 2.185525  | 0.049111  |
| 64 | 8  | 0 | 1.473753  | -0.695343 | 0.560377  |
| 65 | 8  | 0 | 3.091509  | 1.484802  | 2.004386  |
| 66 | 6  | 0 | 2.876239  | 2.797156  | 2.562875  |
| 67 | 1  | 0 | 3.399960  | 3.552099  | 1.970738  |
| 68 | 1  | 0 | 1.806735  | 3.022813  | 2.588045  |
| 69 | 1  | 0 | 3.283101  | 2.744586  | 3.572741  |
| 70 | 6  | 0 | 3.882653  | -0.960927 | 0.968516  |
| 71 | 6  | 0 | 5.213549  | -0.543678 | 0.830778  |
| 72 | 6  | 0 | 6.245914  | -1.255063 | 1.443589  |
| 73 | 6  | 0 | 5.957726  | -2.394718 | 2.203469  |
| 74 | 6  | 0 | 3.598757  | -2.098462 | 1.726612  |
| 75 | 6  | 0 | 4.631518  | -2.811420 | 2.344028  |
| 76 | 1  | 0 | 5.449299  | 0.338567  | 0.238823  |
| 77 | 1  | 0 | 7.274631  | -0.920326 | 1.329624  |
| 78 | 1  | 0 | 6.761090  | -2.948731 | 2.683898  |
| 79 | 1  | 0 | 4.398017  | -3.692652 | 2.937954  |
| 80 | 1  | 0 | 2.562408  | -2.402308 | 1.829998  |
| 81 | 8  | 0 | 1.568377  | -0.049554 | -2.335872 |
| 82 | 15 | 0 | 2.858609  | -0.243857 | -1.576980 |
| 83 | 8  | 0 | 3.518883  | -1.706620 | -1.808084 |
| 84 | 6  | 0 | 3.967005  | -2.105308 | -3.112151 |
| 85 | 1  | 0 | 4.283927  | -3.146130 | -3.018366 |
| 86 | 1  | 0 | 4.813646  | -1.487457 | -3.427332 |
| 87 | 1  | 0 | 3.157718  | -2.026774 | -3.847740 |
| 88 | 8  | 0 | 4.041248  | 0.739022  | -2.119661 |
| 89 | 6  | 0 | 3.753006  | 1.977056  | -2.802725 |
| 90 | 1  | 0 | 2.921801  | 1.844979  | -3.500091 |
| 91 | 1  | 0 | 3.505158  | 2.752320  | -2.073524 |
| 92 | 1  | 0 | 4.665398  | 2.240359  | -3.342794 |

-----  
**ds-TS3**

Standard orientation:

| Center<br>Number | Atomic<br>Number | Atomic<br>Type | Coordinates (Angstroms) |          |           |
|------------------|------------------|----------------|-------------------------|----------|-----------|
|                  |                  |                | X                       | Y        | Z         |
| 1                | 7                | 0              | -0.287042               | 2.849966 | -0.005286 |
| 2                | 6                | 0              | -1.256677               | 1.900626 | 0.257567  |

|    |    |   |           |           |           |
|----|----|---|-----------|-----------|-----------|
| 3  | 7  | 0 | -0.736627 | 0.634773  | 0.250330  |
| 4  | 16 | 0 | -2.880426 | 2.261946  | 0.511012  |
| 5  | 6  | 0 | -0.352988 | 4.261458  | 0.172027  |
| 6  | 6  | 0 | -1.471334 | -0.619267 | 0.006734  |
| 7  | 6  | 0 | -1.949127 | -0.652149 | -1.478839 |
| 8  | 6  | 0 | -3.096380 | -1.605801 | -1.897625 |
| 9  | 6  | 0 | -2.821454 | -2.134120 | -3.321656 |
| 10 | 7  | 0 | -0.748523 | -0.968744 | -2.362341 |
| 11 | 6  | 0 | -1.023484 | -0.434657 | -3.732776 |
| 12 | 6  | 0 | -2.390437 | -0.966198 | -4.260452 |
| 13 | 6  | 0 | -0.513750 | -2.450485 | -2.454471 |
| 14 | 6  | 0 | -1.659268 | -3.135162 | -3.233185 |
| 15 | 1  | 0 | 0.463521  | 2.539221  | -0.627904 |
| 16 | 6  | 0 | -2.464142 | -0.964730 | 1.150973  |
| 17 | 1  | 0 | -0.686372 | -1.378735 | 0.070563  |
| 18 | 1  | 0 | -4.045215 | -1.063356 | -1.870817 |
| 19 | 1  | 0 | -3.190718 | -2.453775 | -1.206550 |
| 20 | 1  | 0 | -0.193163 | -0.757225 | -4.365001 |
| 21 | 1  | 0 | -0.987747 | 0.653741  | -3.665529 |
| 22 | 6  | 0 | -3.532645 | 0.054685  | -4.449187 |
| 23 | 1  | 0 | -2.216193 | -1.411485 | -5.253863 |
| 24 | 1  | 0 | 0.453087  | -2.581057 | -2.941052 |
| 25 | 1  | 0 | -0.427489 | -2.831671 | -1.433709 |
| 26 | 1  | 0 | -1.978264 | -4.048847 | -2.716787 |
| 27 | 1  | 0 | -3.718855 | -2.618174 | -3.722407 |
| 28 | 1  | 0 | -1.326580 | -3.430016 | -4.236296 |
| 29 | 1  | 0 | 0.248705  | 0.557276  | -0.013269 |
| 30 | 6  | 0 | -1.085075 | 4.858622  | 1.199350  |
| 31 | 6  | 0 | -1.067074 | 6.234436  | 1.349449  |
| 32 | 6  | 0 | -0.317692 | 7.032155  | 0.498465  |
| 33 | 6  | 0 | 0.422462  | 6.439670  | -0.512771 |
| 34 | 6  | 0 | 0.407009  | 5.066929  | -0.679054 |
| 35 | 1  | 0 | -1.642200 | 6.687105  | 2.147616  |
| 36 | 1  | 0 | -0.307694 | 8.106245  | 0.624819  |
| 37 | 1  | 0 | 1.015564  | 7.051651  | -1.180797 |
| 38 | 1  | 0 | 0.982997  | 4.601728  | -1.467457 |
| 39 | 1  | 0 | -1.668979 | 4.242062  | 1.866367  |
| 40 | 1  | 0 | 0.377605  | -0.525087 | -1.929827 |
| 41 | 6  | 0 | -1.931987 | -1.469971 | 2.398513  |
| 42 | 6  | 0 | -2.841106 | -1.812268 | 3.415390  |
| 43 | 7  | 0 | -4.231744 | -1.680363 | 3.291609  |
| 44 | 6  | 0 | -4.652697 | -1.191301 | 2.147422  |
| 45 | 6  | 0 | -3.806643 | -0.821210 | 1.056867  |
| 46 | 6  | 0 | -0.536232 | -1.632423 | 2.670683  |
| 47 | 1  | 0 | -4.272591 | -0.412134 | 0.174623  |
| 48 | 6  | 0 | -3.503531 | 1.350479  | -4.275184 |
| 49 | 1  | 0 | -4.379183 | 1.957504  | -4.458916 |
| 50 | 1  | 0 | -2.629101 | 1.892492  | -3.945593 |
| 51 | 1  | 0 | -4.451357 | -0.412915 | -4.787392 |
| 52 | 1  | 0 | -2.240539 | 0.367882  | -1.737691 |
| 53 | 6  | 0 | -2.357627 | -2.322489 | 4.661668  |
| 54 | 6  | 0 | -1.030357 | -2.470558 | 4.879781  |
| 55 | 6  | 0 | -0.104325 | -2.112429 | 3.861753  |
| 56 | 1  | 0 | -5.727361 | -1.068279 | 2.032322  |
| 57 | 1  | 0 | -3.090807 | -2.578404 | 5.415942  |
| 58 | 1  | 0 | -0.662101 | -2.853751 | 5.822789  |
| 59 | 1  | 0 | 0.956155  | -2.224078 | 4.049502  |
| 60 | 1  | 0 | 0.187278  | -1.352982 | 1.919432  |
| 61 | 6  | 0 | 2.327368  | 1.455604  | -2.685787 |
| 62 | 6  | 0 | 2.591387  | 0.145179  | -1.899786 |
| 63 | 8  | 0 | 1.443491  | 2.237871  | -2.397079 |
| 64 | 8  | 0 | 1.425156  | -0.290385 | -1.308341 |

|    |    |   |          |           |           |
|----|----|---|----------|-----------|-----------|
| 65 | 8  | 0 | 3.174127 | 1.655536  | -3.709468 |
| 66 | 6  | 0 | 2.997136 | 2.881126  | -4.455633 |
| 67 | 1  | 0 | 1.994665 | 2.915384  | -4.888041 |
| 68 | 1  | 0 | 3.145716 | 3.743543  | -3.801394 |
| 69 | 1  | 0 | 3.755320 | 2.853456  | -5.238316 |
| 70 | 6  | 0 | 3.684334 | 0.430248  | -0.843661 |
| 71 | 6  | 0 | 4.881737 | 1.090629  | -1.157231 |
| 72 | 6  | 0 | 5.836951 | 1.334639  | -0.167752 |
| 73 | 6  | 0 | 5.612561 | 0.918403  | 1.147125  |
| 74 | 6  | 0 | 3.468693 | 0.010234  | 0.474097  |
| 75 | 6  | 0 | 4.425418 | 0.252931  | 1.462338  |
| 76 | 1  | 0 | 5.078716 | 1.410161  | -2.174953 |
| 77 | 1  | 0 | 6.758002 | 1.850655  | -0.428035 |
| 78 | 1  | 0 | 6.355406 | 1.110656  | 1.917281  |
| 79 | 1  | 0 | 4.239547 | -0.078252 | 2.481124  |
| 80 | 1  | 0 | 2.549626 | -0.511123 | 0.711800  |
| 81 | 8  | 0 | 2.161765 | -1.502562 | -4.181347 |
| 82 | 15 | 0 | 3.144609 | -1.227193 | -3.084079 |
| 83 | 8  | 0 | 3.368736 | -2.410810 | -2.012248 |
| 84 | 6  | 0 | 3.906995 | -3.679504 | -2.423590 |
| 85 | 1  | 0 | 3.911452 | -4.308026 | -1.531283 |
| 86 | 1  | 0 | 4.929018 | -3.556256 | -2.795270 |
| 87 | 1  | 0 | 3.278215 | -4.135678 | -3.195640 |
| 88 | 8  | 0 | 4.659314 | -0.996994 | -3.623979 |
| 89 | 6  | 0 | 4.943563 | -0.654665 | -4.992410 |
| 90 | 1  | 0 | 4.118944 | -0.950988 | -5.645636 |
| 91 | 1  | 0 | 5.112046 | 0.423155  | -5.064833 |
| 92 | 1  | 0 | 5.855203 | -1.191545 | -5.266413 |

### *ds-IM5*

Standard orientation:

| Center Number | Atomic Number | Atomic Type | Coordinates (Angstroms) |           |           |
|---------------|---------------|-------------|-------------------------|-----------|-----------|
|               |               |             | X                       | Y         | Z         |
| 1             | 7             | 0           | -0.291510               | 2.852734  | 0.016549  |
| 2             | 6             | 0           | -1.299849               | 1.920880  | 0.203563  |
| 3             | 7             | 0           | -0.809461               | 0.645553  | 0.204346  |
| 4             | 16            | 0           | -2.924677               | 2.318989  | 0.368052  |
| 5             | 6             | 0           | -0.337529               | 4.260316  | 0.225922  |
| 6             | 6             | 0           | -1.552216               | -0.608531 | -0.024974 |
| 7             | 6             | 0           | -2.033442               | -0.676311 | -1.506207 |
| 8             | 6             | 0           | -3.156723               | -1.685831 | -1.870857 |
| 9             | 6             | 0           | -2.866321               | -2.268241 | -3.270465 |
| 10            | 7             | 0           | -0.838857               | -0.942015 | -2.386792 |
| 11            | 6             | 0           | -1.174871               | -0.478120 | -3.757120 |
| 12            | 6             | 0           | -2.503534               | -1.127822 | -4.269554 |
| 13            | 6             | 0           | -0.523654               | -2.398975 | -2.448513 |
| 14            | 6             | 0           | -1.653980               | -3.202672 | -3.144300 |
| 15            | 1             | 0           | 0.477692                | 2.542378  | -0.581412 |
| 16            | 6             | 0           | -2.552627               | -0.908999 | 1.127036  |
| 17            | 1             | 0           | -0.776067               | -1.374690 | 0.056838  |
| 18            | 1             | 0           | -4.127761               | -1.181831 | -1.864526 |
| 19            | 1             | 0           | -3.217856               | -2.507544 | -1.143824 |
| 20            | 1             | 0           | -0.335010               | -0.748566 | -4.403615 |
| 21            | 1             | 0           | -1.230876               | 0.612375  | -3.733363 |
| 22            | 6             | 0           | -3.711658               | -0.198977 | -4.518057 |
| 23            | 1             | 0           | -2.297338               | -1.614103 | -5.238165 |
| 24            | 1             | 0           | 0.422689                | -2.498395 | -2.984681 |
| 25            | 1             | 0           | -0.355528               | -2.753989 | -1.426784 |
| 26            | 1             | 0           | -1.917725               | -4.092419 | -2.557649 |



|    |    |   |           |           |           |
|----|----|---|-----------|-----------|-----------|
| 27 | 1  | 0 | -3.741056 | -2.817586 | -3.637255 |
| 28 | 1  | 0 | -1.333653 | -3.552695 | -4.134369 |
| 29 | 1  | 0 | 0.194409  | 0.559403  | 0.069221  |
| 30 | 6  | 0 | -1.106617 | 4.846544  | 1.232666  |
| 31 | 6  | 0 | -1.068437 | 6.217099  | 1.420579  |
| 32 | 6  | 0 | -0.262335 | 7.020733  | 0.628769  |
| 33 | 6  | 0 | 0.514100  | 6.439020  | -0.360989 |
| 34 | 6  | 0 | 0.478973  | 5.071592  | -0.564961 |
| 35 | 1  | 0 | -1.672840 | 6.661009  | 2.201879  |
| 36 | 1  | 0 | -0.237079 | 8.090696  | 0.784411  |
| 37 | 1  | 0 | 1.151217  | 7.055296  | -0.982963 |
| 38 | 1  | 0 | 1.083051  | 4.615610  | -1.337379 |
| 39 | 1  | 0 | -1.734880 | 4.225638  | 1.853795  |
| 40 | 1  | 0 | 0.802885  | -0.383779 | -1.837020 |
| 41 | 6  | 0 | -2.040959 | -1.402032 | 2.388026  |
| 42 | 6  | 0 | -2.963090 | -1.692869 | 3.409207  |
| 43 | 7  | 0 | -4.348633 | -1.521865 | 3.277480  |
| 44 | 6  | 0 | -4.750727 | -1.048582 | 2.119723  |
| 45 | 6  | 0 | -3.890267 | -0.729243 | 1.024457  |
| 46 | 6  | 0 | -0.651967 | -1.602915 | 2.669773  |
| 47 | 1  | 0 | -4.339483 | -0.329513 | 0.129031  |
| 48 | 6  | 0 | -3.785283 | 1.099324  | -4.378591 |
| 49 | 1  | 0 | -4.698323 | 1.634095  | -4.600190 |
| 50 | 1  | 0 | -2.963014 | 1.712777  | -4.041188 |
| 51 | 1  | 0 | -4.585709 | -0.740925 | -4.864753 |
| 52 | 1  | 0 | -2.377890 | 0.327093  | -1.767541 |
| 53 | 6  | 0 | -2.499249 | -2.188399 | 4.668964  |
| 54 | 6  | 0 | -1.178086 | -2.372730 | 4.895875  |
| 55 | 6  | 0 | -0.238430 | -2.068418 | 3.872942  |
| 56 | 1  | 0 | -5.821001 | -0.896967 | 1.997509  |
| 57 | 1  | 0 | -3.242355 | -2.403843 | 5.426202  |
| 58 | 1  | 0 | -0.824926 | -2.745111 | 5.848869  |
| 59 | 1  | 0 | 0.817302  | -2.210215 | 4.066756  |
| 60 | 1  | 0 | 0.082346  | -1.367400 | 1.914008  |
| 61 | 6  | 0 | 2.463252  | 1.500642  | -2.631065 |
| 62 | 6  | 0 | 2.773352  | 0.174760  | -1.897873 |
| 63 | 8  | 0 | 1.580754  | 2.258356  | -2.287106 |
| 64 | 8  | 0 | 1.613560  | -0.269906 | -1.242870 |
| 65 | 8  | 0 | 3.276431  | 1.732960  | -3.670810 |
| 66 | 6  | 0 | 3.054066  | 2.970196  | -4.388811 |
| 67 | 1  | 0 | 2.036621  | 2.992655  | -4.784751 |
| 68 | 1  | 0 | 3.211624  | 3.822057  | -3.723278 |
| 69 | 1  | 0 | 3.785431  | 2.967728  | -5.196696 |
| 70 | 6  | 0 | 3.872440  | 0.421030  | -0.851233 |
| 71 | 6  | 0 | 5.053772  | 1.105255  | -1.173004 |
| 72 | 6  | 0 | 6.034516  | 1.318689  | -0.202329 |
| 73 | 6  | 0 | 5.851338  | 0.848638  | 1.100376  |
| 74 | 6  | 0 | 3.695826  | -0.053614 | 0.454760  |
| 75 | 6  | 0 | 4.679529  | 0.160364  | 1.422773  |
| 76 | 1  | 0 | 5.217894  | 1.466645  | -2.182348 |
| 77 | 1  | 0 | 6.942779  | 1.853693  | -0.468087 |
| 78 | 1  | 0 | 6.614124  | 1.017330  | 1.856179  |
| 79 | 1  | 0 | 4.525205  | -0.211946 | 2.432349  |
| 80 | 1  | 0 | 2.790832  | -0.592330 | 0.706557  |
| 81 | 8  | 0 | 2.248593  | -1.396697 | -4.196960 |
| 82 | 15 | 0 | 3.265799  | -1.177840 | -3.125044 |
| 83 | 8  | 0 | 3.502691  | -2.376458 | -2.080111 |
| 84 | 6  | 0 | 3.935117  | -3.673469 | -2.534055 |
| 85 | 1  | 0 | 3.982206  | -4.301729 | -1.643279 |
| 86 | 1  | 0 | 4.926885  | -3.603957 | -2.991736 |
| 87 | 1  | 0 | 3.216733  | -4.090369 | -3.246824 |
| 88 | 8  | 0 | 4.764650  | -0.921118 | -3.680042 |

|    |   |   |          |           |           |
|----|---|---|----------|-----------|-----------|
| 89 | 6 | 0 | 5.026797 | -0.539418 | -5.045010 |
| 90 | 1 | 0 | 4.179942 | -0.792485 | -5.687467 |
| 91 | 1 | 0 | 5.220999 | 0.535485  | -5.081914 |
| 92 | 1 | 0 | 5.917676 | -1.089506 | -5.357033 |

**ms-IM3**

Standard orientation:

| Center<br>Number | Atomic<br>Number | Atomic<br>Type | Coordinates (Angstroms) |           |           |
|------------------|------------------|----------------|-------------------------|-----------|-----------|
|                  |                  |                | X                       | Y         | Z         |
| 1                | 6                | 0              | 1.627156                | 0.573423  | -3.155134 |
| 2                | 6                | 0              | 0.975927                | -1.875170 | -2.298309 |
| 3                | 6                | 0              | 0.758936                | -0.343605 | -2.362191 |
| 4                | 8                | 0              | -0.298175               | 0.061139  | -1.877509 |
| 5                | 8                | 0              | 2.106921                | -2.312135 | -2.860187 |
| 6                | 6                | 0              | 2.365026                | -3.727086 | -2.745481 |
| 7                | 1                | 0              | 2.438131                | -4.000184 | -1.689606 |
| 8                | 1                | 0              | 1.566272                | -4.298515 | -3.224717 |
| 9                | 1                | 0              | 3.315896                | -3.886064 | -3.254007 |
| 10               | 8                | 0              | 0.116701                | -2.612619 | -1.850023 |
| 11               | 6                | 0              | 1.007607                | 1.735471  | -3.655198 |
| 12               | 6                | 0              | 1.726455                | 2.648900  | -4.423978 |
| 13               | 6                | 0              | 3.080910                | 2.424631  | -4.689602 |
| 14               | 6                | 0              | 2.991226                | 0.357625  | -3.424822 |
| 15               | 6                | 0              | 3.708877                | 1.281930  | -4.182822 |
| 16               | 1                | 0              | -0.040055               | 1.907792  | -3.431598 |
| 17               | 1                | 0              | 1.232070                | 3.537375  | -4.808050 |
| 18               | 1                | 0              | 3.645853                | 3.138728  | -5.283739 |
| 19               | 1                | 0              | 4.765349                | 1.111851  | -4.373530 |
| 20               | 1                | 0              | 3.492528                | -0.511500 | -3.020524 |
| 21               | 8                | 0              | 1.974011                | 0.697058  | 1.158529  |
| 22               | 15               | 0              | 2.452094                | -0.513415 | 0.302520  |
| 23               | 8                | 0              | 2.180932                | -1.907429 | 1.207904  |
| 24               | 6                | 0              | 2.721393                | -2.027656 | 2.531489  |
| 25               | 1                | 0              | 2.281462                | -2.926810 | 2.974910  |
| 26               | 1                | 0              | 3.810645                | -2.133064 | 2.493389  |
| 27               | 1                | 0              | 2.466219                | -1.152864 | 3.141937  |
| 28               | 8                | 0              | 4.142562                | -0.528387 | 0.446236  |
| 29               | 6                | 0              | 4.863035                | 0.700648  | 0.416941  |
| 30               | 1                | 0              | 5.910883                | 0.459148  | 0.621523  |
| 31               | 1                | 0              | 4.491816                | 1.395451  | 1.178581  |
| 32               | 1                | 0              | 4.798628                | 1.181488  | -0.570240 |
| 33               | 7                | 0              | 0.541573                | 2.985788  | 0.132528  |
| 34               | 6                | 0              | -0.715028               | 2.591074  | 0.505858  |
| 35               | 7                | 0              | -0.665061               | 1.437877  | 1.246510  |
| 36               | 16               | 0              | -2.174142               | 3.360828  | 0.113210  |
| 37               | 6                | 0              | 1.005915                | 4.076731  | -0.651469 |
| 38               | 6                | 0              | -1.728529               | 0.845576  | 2.047718  |
| 39               | 6                | 0              | -2.767167               | 0.108308  | 1.169704  |
| 40               | 6                | 0              | -3.802908               | -0.737049 | 1.955333  |
| 41               | 6                | 0              | -3.782001               | -2.197688 | 1.467044  |
| 42               | 7                | 0              | -2.056054               | -0.832802 | 0.202053  |
| 43               | 6                | 0              | -3.057364               | -1.368668 | -0.792016 |
| 44               | 6                | 0              | -4.095588               | -2.260261 | -0.056050 |
| 45               | 6                | 0              | -1.349254               | -1.987108 | 0.880840  |
| 46               | 6                | 0              | -2.377788               | -2.776938 | 1.718043  |
| 47               | 1                | 0              | 1.285425                | 2.334688  | 0.439822  |
| 48               | 6                | 0              | -2.346829               | 1.826963  | 3.086081  |
| 49               | 1                | 0              | -1.217212               | 0.072441  | 2.634907  |
| 50               | 1                | 0              | -4.803423               | -0.309768 | 1.832494  |

|    |   |   |           |           |           |
|----|---|---|-----------|-----------|-----------|
| 51 | 1 | 0 | -3.576072 | -0.708694 | 3.028637  |
| 52 | 1 | 0 | -2.480801 | -1.911406 | -1.541982 |
| 53 | 1 | 0 | -3.501272 | -0.493204 | -1.265672 |
| 54 | 6 | 0 | -5.577863 | -1.950498 | -0.350267 |
| 55 | 1 | 0 | -3.927640 | -3.304185 | -0.367842 |
| 56 | 1 | 0 | -0.906122 | -2.570864 | 0.075334  |
| 57 | 1 | 0 | -0.522110 | -1.584134 | 1.464131  |
| 58 | 1 | 0 | -2.137929 | -2.714337 | 2.785923  |
| 59 | 1 | 0 | -4.527261 | -2.780215 | 2.018504  |
| 60 | 1 | 0 | -2.345290 | -3.837635 | 1.444585  |
| 61 | 1 | 0 | 0.282976  | 1.035416  | 1.364822  |
| 62 | 1 | 0 | -1.350683 | -0.311691 | -0.352640 |
| 63 | 6 | 0 | 0.178825  | 5.050935  | -1.208344 |
| 64 | 6 | 0 | 0.731213  | 6.082411  | -1.950734 |
| 65 | 6 | 0 | 2.098432  | 6.164335  | -2.149332 |
| 66 | 6 | 0 | 2.924432  | 5.196373  | -1.593607 |
| 67 | 6 | 0 | 2.389496  | 4.162384  | -0.852398 |
| 68 | 1 | 0 | 3.033106  | 3.409419  | -0.417714 |
| 69 | 1 | 0 | 3.996159  | 5.249015  | -1.738975 |
| 70 | 1 | 0 | 2.520351  | 6.974032  | -2.728942 |
| 71 | 1 | 0 | 0.077957  | 6.833395  | -2.377664 |
| 72 | 1 | 0 | -0.886038 | 4.974868  | -1.042199 |
| 73 | 6 | 0 | -3.607208 | 2.310185  | 2.995711  |
| 74 | 6 | 0 | -4.112367 | 3.194765  | 3.998728  |
| 75 | 7 | 0 | -3.436707 | 3.599510  | 5.049391  |
| 76 | 6 | 0 | -2.123006 | 3.116397  | 5.148980  |
| 77 | 6 | 0 | -1.539430 | 2.248033  | 4.209408  |
| 78 | 6 | 0 | -1.364953 | 3.553158  | 6.280413  |
| 79 | 6 | 0 | -0.086336 | 3.143750  | 6.453385  |
| 80 | 6 | 0 | 0.512457  | 2.272704  | 5.501891  |
| 81 | 6 | 0 | -0.184558 | 1.840196  | 4.423062  |
| 82 | 1 | 0 | -4.259998 | 2.057414  | 2.174310  |
| 83 | 1 | 0 | -5.130698 | 3.563480  | 3.897542  |
| 84 | 1 | 0 | 0.300114  | 1.192360  | 3.707023  |
| 85 | 1 | 0 | 1.539003  | 1.958635  | 5.644136  |
| 86 | 1 | 0 | 0.490858  | 3.475081  | 7.307282  |
| 87 | 1 | 0 | -1.850143 | 4.219504  | 6.982106  |
| 88 | 1 | 0 | -3.246894 | 0.844302  | 0.524054  |
| 89 | 6 | 0 | -6.064671 | -1.202090 | -1.305794 |
| 90 | 1 | 0 | -6.253612 | -2.466881 | 0.322389  |
| 91 | 1 | 0 | -7.132279 | -1.081331 | -1.428793 |
| 92 | 1 | 0 | -5.454401 | -0.670835 | -2.022315 |

-----  
***ms-TS2***

Standard orientation:

| Center<br>Number | Atomic<br>Number | Atomic<br>Type | Coordinates (Angstroms) |           |           |
|------------------|------------------|----------------|-------------------------|-----------|-----------|
|                  |                  |                | X                       | Y         | Z         |
| 1                | 6                | 0              | 1.818905                | 0.360732  | -2.932087 |
| 2                | 6                | 0              | 1.138559                | -2.048359 | -2.052321 |
| 3                | 6                | 0              | 1.023245                | -0.511255 | -1.987276 |
| 4                | 8                | 0              | -0.061618               | -0.070966 | -1.540019 |
| 5                | 8                | 0              | 2.264346                | -2.511530 | -2.613379 |
| 6                | 6                | 0              | 2.418444                | -3.943222 | -2.643762 |
| 7                | 1                | 0              | 2.426406                | -4.338972 | -1.624848 |
| 8                | 1                | 0              | 1.604771                | -4.401929 | -3.211567 |
| 9                | 1                | 0              | 3.377083                | -4.117250 | -3.133194 |
| 10               | 8                | 0              | 0.242049                | -2.777782 | -1.663348 |
| 11               | 6                | 0              | 1.144411                | 1.476973  | -3.455428 |
| 12               | 6                | 0              | 1.771706                | 2.328834  | -4.366869 |

|    |    |   |           |           |           |
|----|----|---|-----------|-----------|-----------|
| 13 | 6  | 0 | 3.089476  | 2.085215  | -4.760982 |
| 14 | 6  | 0 | 3.147739  | 0.127611  | -3.328020 |
| 15 | 6  | 0 | 3.773717  | 0.984389  | -4.233611 |
| 16 | 1  | 0 | 0.125545  | 1.664636  | -3.134353 |
| 17 | 1  | 0 | 1.230043  | 3.184309  | -4.763169 |
| 18 | 1  | 0 | 3.582211  | 2.748057  | -5.468206 |
| 19 | 1  | 0 | 4.803730  | 0.793151  | -4.525112 |
| 20 | 1  | 0 | 3.698158  | -0.708207 | -2.915327 |
| 21 | 8  | 0 | 2.015466  | 0.755402  | 0.955727  |
| 22 | 15 | 0 | 2.520491  | -0.424218 | 0.101631  |
| 23 | 8  | 0 | 2.354133  | -1.843340 | 0.954690  |
| 24 | 6  | 0 | 2.953596  | -1.986252 | 2.253527  |
| 25 | 1  | 0 | 2.609914  | -2.944208 | 2.653930  |
| 26 | 1  | 0 | 4.045272  | -1.991106 | 2.171602  |
| 27 | 1  | 0 | 2.641832  | -1.173107 | 2.919296  |
| 28 | 8  | 0 | 4.193722  | -0.356672 | 0.083336  |
| 29 | 6  | 0 | 4.872163  | 0.904306  | 0.091492  |
| 30 | 1  | 0 | 5.929763  | 0.685649  | 0.264536  |
| 31 | 1  | 0 | 4.491404  | 1.548197  | 0.890621  |
| 32 | 1  | 0 | 4.764676  | 1.414558  | -0.873789 |
| 33 | 7  | 0 | 0.420545  | 3.056510  | 0.031482  |
| 34 | 6  | 0 | -0.796473 | 2.611352  | 0.474809  |
| 35 | 7  | 0 | -0.660166 | 1.483426  | 1.237898  |
| 36 | 16 | 0 | -2.303334 | 3.312466  | 0.136047  |
| 37 | 6  | 0 | 0.799155  | 4.163727  | -0.777547 |
| 38 | 6  | 0 | -1.675698 | 0.809816  | 2.037589  |
| 39 | 6  | 0 | -2.693175 | 0.029222  | 1.170331  |
| 40 | 6  | 0 | -3.716657 | -0.813180 | 1.970998  |
| 41 | 6  | 0 | -3.916489 | -2.182821 | 1.291421  |
| 42 | 7  | 0 | -1.970810 | -0.932733 | 0.233617  |
| 43 | 6  | 0 | -2.920988 | -1.368747 | -0.857414 |
| 44 | 6  | 0 | -4.198543 | -1.985557 | -0.228655 |
| 45 | 6  | 0 | -1.433506 | -2.151067 | 0.949997  |
| 46 | 6  | 0 | -2.622032 | -3.000740 | 1.451095  |
| 47 | 1  | 0 | 1.203708  | 2.438226  | 0.287550  |
| 48 | 6  | 0 | -2.314266 | 1.735779  | 3.114191  |
| 49 | 1  | 0 | -1.109404 | 0.052962  | 2.592899  |
| 50 | 1  | 0 | -4.666920 | -0.276054 | 2.032054  |
| 51 | 1  | 0 | -3.369800 | -0.962938 | 3.002812  |
| 52 | 1  | 0 | -2.364297 | -2.082073 | -1.466883 |
| 53 | 1  | 0 | -3.110393 | -0.486563 | -1.467451 |
| 54 | 6  | 0 | -5.530706 | -1.244414 | -0.464232 |
| 55 | 1  | 0 | -4.327215 | -2.991101 | -0.658952 |
| 56 | 1  | 0 | -0.796594 | -2.666498 | 0.232039  |
| 57 | 1  | 0 | -0.796702 | -1.797574 | 1.761544  |
| 58 | 1  | 0 | -2.472595 | -3.271381 | 2.502612  |
| 59 | 1  | 0 | -4.755908 | -2.710737 | 1.755906  |
| 60 | 1  | 0 | -2.689848 | -3.937710 | 0.885616  |
| 61 | 1  | 0 | 0.293661  | 1.095387  | 1.287864  |
| 62 | 1  | 0 | -1.171151 | -0.476126 | -0.272516 |
| 63 | 6  | 0 | -0.094060 | 5.105853  | -1.284513 |
| 64 | 6  | 0 | 0.376823  | 6.157150  | -2.054821 |
| 65 | 6  | 0 | 1.726699  | 6.290061  | -2.330096 |
| 66 | 6  | 0 | 2.618343  | 5.353808  | -1.823982 |
| 67 | 6  | 0 | 2.164782  | 4.300832  | -1.055578 |
| 68 | 1  | 0 | 2.859691  | 3.572287  | -0.660243 |
| 69 | 1  | 0 | 3.677363  | 5.445933  | -2.030045 |
| 70 | 1  | 0 | 2.084624  | 7.114519  | -2.931563 |
| 71 | 1  | 0 | -0.327173 | 6.882761  | -2.443223 |
| 72 | 1  | 0 | -1.144421 | 4.988661  | -1.060252 |
| 73 | 6  | 0 | -3.574377 | 2.220241  | 3.026295  |
| 74 | 6  | 0 | -4.098473 | 3.055617  | 4.061413  |

|    |   |   |           |           |           |
|----|---|---|-----------|-----------|-----------|
| 75 | 7 | 0 | -3.440541 | 3.413499  | 5.140101  |
| 76 | 6 | 0 | -2.125210 | 2.934384  | 5.234936  |
| 77 | 6 | 0 | -1.523644 | 2.113461  | 4.264588  |
| 78 | 6 | 0 | -1.384227 | 3.326074  | 6.394027  |
| 79 | 6 | 0 | -0.103541 | 2.921886  | 6.563358  |
| 80 | 6 | 0 | 0.514836  | 2.102059  | 5.579472  |
| 81 | 6 | 0 | -0.166385 | 1.711986  | 4.474832  |
| 82 | 1 | 0 | -4.210863 | 2.006145  | 2.181418  |
| 83 | 1 | 0 | -5.116924 | 3.424569  | 3.962165  |
| 84 | 1 | 0 | 0.332545  | 1.103923  | 3.734420  |
| 85 | 1 | 0 | 1.543522  | 1.793672  | 5.718483  |
| 86 | 1 | 0 | 0.460780  | 3.219592  | 7.437930  |
| 87 | 1 | 0 | -1.883940 | 3.955506  | 7.119302  |
| 88 | 1 | 0 | -3.190377 | 0.738876  | 0.508717  |
| 89 | 6 | 0 | -5.731708 | -0.110238 | -1.083283 |
| 90 | 1 | 0 | -6.375532 | -1.782443 | -0.048516 |
| 91 | 1 | 0 | -6.728225 | 0.297166  | -1.185852 |
| 92 | 1 | 0 | -4.944615 | 0.484120  | -1.525369 |

-----  
**ms-IM4**

Standard orientation:

| Center<br>Number | Atomic<br>Number | Atomic<br>Type | Coordinates (Angstroms) |           |           |
|------------------|------------------|----------------|-------------------------|-----------|-----------|
|                  |                  |                | X                       | Y         | Z         |
| 1                | 6                | 0              | 1.963574                | 0.184519  | -2.624004 |
| 2                | 6                | 0              | 1.374771                | -2.089455 | -1.620229 |
| 3                | 6                | 0              | 1.420425                | -0.550831 | -1.363302 |
| 4                | 8                | 0              | 0.237796                | -0.061675 | -0.958038 |
| 5                | 8                | 0              | 2.584535                | -2.636075 | -1.838156 |
| 6                | 6                | 0              | 2.613942                | -4.053919 | -2.084447 |
| 7                | 1                | 0              | 2.209243                | -4.594904 | -1.224738 |
| 8                | 1                | 0              | 2.030299                | -4.296968 | -2.976332 |
| 9                | 1                | 0              | 3.666095                | -4.299007 | -2.232811 |
| 10               | 8                | 0              | 0.346688                | -2.737705 | -1.622782 |
| 11               | 6                | 0              | 1.170190                | 1.215019  | -3.144002 |
| 12               | 6                | 0              | 1.575327                | 1.922788  | -4.279351 |
| 13               | 6                | 0              | 2.784822                | 1.615560  | -4.907349 |
| 14               | 6                | 0              | 3.180383                | -0.118215 | -3.256699 |
| 15               | 6                | 0              | 3.585455                | 0.592648  | -4.389883 |
| 16               | 1                | 0              | 0.238700                | 1.445726  | -2.640025 |
| 17               | 1                | 0              | 0.943876                | 2.718089  | -4.668797 |
| 18               | 1                | 0              | 3.101543                | 2.166077  | -5.790050 |
| 19               | 1                | 0              | 4.529418                | 0.342859  | -4.869350 |
| 20               | 1                | 0              | 3.812078                | -0.909095 | -2.869192 |
| 21               | 8                | 0              | 2.274555                | 1.092510  | 0.805455  |
| 22               | 15               | 0              | 2.591651                | -0.210352 | 0.114506  |
| 23               | 8                | 0              | 2.328462                | -1.515762 | 1.049873  |
| 24               | 6                | 0              | 3.004013                | -1.641479 | 2.315359  |
| 25               | 1                | 0              | 2.592239                | -2.531823 | 2.795131  |
| 26               | 1                | 0              | 4.079354                | -1.770062 | 2.157514  |
| 27               | 1                | 0              | 2.821106                | -0.761866 | 2.941151  |
| 28               | 8                | 0              | 4.182623                | -0.345722 | -0.202269 |
| 29               | 6                | 0              | 5.022952                | 0.820020  | -0.339186 |
| 30               | 1                | 0              | 6.049911                | 0.461038  | -0.242514 |
| 31               | 1                | 0              | 4.799755                | 1.548618  | 0.444109  |
| 32               | 1                | 0              | 4.878624                | 1.271905  | -1.324870 |
| 33               | 7                | 0              | 0.362503                | 3.237262  | 0.002518  |
| 34               | 6                | 0              | -0.816711               | 2.773060  | 0.525282  |
| 35               | 7                | 0              | -0.613604               | 1.666739  | 1.300818  |
| 36               | 16               | 0              | -2.350825               | 3.446437  | 0.260014  |

|    |   |   |           |           |           |
|----|---|---|-----------|-----------|-----------|
| 37 | 6 | 0 | 0.678143  | 4.368840  | -0.800020 |
| 38 | 6 | 0 | -1.598782 | 0.867207  | 2.028791  |
| 39 | 6 | 0 | -2.569023 | 0.090272  | 1.097158  |
| 40 | 6 | 0 | -3.709096 | -0.673845 | 1.819926  |
| 41 | 6 | 0 | -3.954867 | -2.027589 | 1.123117  |
| 42 | 7 | 0 | -1.820441 | -0.932240 | 0.253438  |
| 43 | 6 | 0 | -2.689584 | -1.311566 | -0.915674 |
| 44 | 6 | 0 | -4.070178 | -1.820962 | -0.417326 |
| 45 | 6 | 0 | -1.463923 | -2.170494 | 1.028506  |
| 46 | 6 | 0 | -2.749426 | -2.940100 | 1.406113  |
| 47 | 1 | 0 | 1.170866  | 2.633947  | 0.195005  |
| 48 | 6 | 0 | -2.270013 | 1.685473  | 3.172065  |
| 49 | 1 | 0 | -0.991434 | 0.103088  | 2.524936  |
| 50 | 1 | 0 | -4.620649 | -0.070896 | 1.808734  |
| 51 | 1 | 0 | -3.456730 | -0.847233 | 2.875433  |
| 52 | 1 | 0 | -2.135756 | -2.073116 | -1.466847 |
| 53 | 1 | 0 | -2.750313 | -0.429177 | -1.551491 |
| 54 | 6 | 0 | -5.312008 | -0.980439 | -0.780733 |
| 55 | 1 | 0 | -4.238484 | -2.817273 | -0.857088 |
| 56 | 1 | 0 | -0.793437 | -2.745367 | 0.389396  |
| 57 | 1 | 0 | -0.894997 | -1.856893 | 1.906219  |
| 58 | 1 | 0 | -2.726089 | -3.221708 | 2.465596  |
| 59 | 1 | 0 | -4.874530 | -2.483468 | 1.505440  |
| 60 | 1 | 0 | -2.828195 | -3.868914 | 0.828146  |
| 61 | 1 | 0 | 0.325685  | 1.270747  | 1.248204  |
| 62 | 1 | 0 | -0.867727 | -0.554997 | -0.206703 |
| 63 | 6 | 0 | -0.249724 | 5.325947  | -1.206740 |
| 64 | 6 | 0 | 0.162561  | 6.400506  | -1.978447 |
| 65 | 6 | 0 | 1.487310  | 6.541983  | -2.354063 |
| 66 | 6 | 0 | 2.413245  | 5.590448  | -1.948543 |
| 67 | 6 | 0 | 2.018072  | 4.514538  | -1.179615 |
| 68 | 1 | 0 | 2.739603  | 3.774056  | -0.861976 |
| 69 | 1 | 0 | 3.453037  | 5.688658  | -2.234270 |
| 70 | 1 | 0 | 1.799111  | 7.384282  | -2.956458 |
| 71 | 1 | 0 | -0.567912 | 7.137468  | -2.288786 |
| 72 | 1 | 0 | -1.280381 | 5.199336  | -0.908271 |
| 73 | 6 | 0 | -3.512154 | 2.213376  | 3.073763  |
| 74 | 6 | 0 | -4.072661 | 2.949064  | 4.163786  |
| 75 | 7 | 0 | -3.466311 | 3.172958  | 5.307242  |
| 76 | 6 | 0 | -2.168065 | 2.652960  | 5.415023  |
| 77 | 6 | 0 | -1.533014 | 1.923861  | 4.393768  |
| 78 | 6 | 0 | -1.481056 | 2.903713  | 6.644667  |
| 79 | 6 | 0 | -0.217931 | 2.456384  | 6.834431  |
| 80 | 6 | 0 | 0.436488  | 1.732607  | 5.800089  |
| 81 | 6 | 0 | -0.194255 | 1.476173  | 4.628681  |
| 82 | 1 | 0 | -4.102713 | 2.108163  | 2.176642  |
| 83 | 1 | 0 | -5.076247 | 3.353850  | 4.052859  |
| 84 | 1 | 0 | 0.331460  | 0.939507  | 3.853076  |
| 85 | 1 | 0 | 1.451768  | 1.390186  | 5.956242  |
| 86 | 1 | 0 | 0.305237  | 2.647656  | 7.762557  |
| 87 | 1 | 0 | -2.007318 | 3.464421  | 7.406745  |
| 88 | 1 | 0 | -2.981949 | 0.801626  | 0.381132  |
| 89 | 6 | 0 | -5.365974 | 0.146226  | -1.442382 |
| 90 | 1 | 0 | -6.231712 | -1.433645 | -0.426826 |
| 91 | 1 | 0 | -6.312604 | 0.630407  | -1.639473 |
| 92 | 1 | 0 | -4.497316 | 0.659522  | -1.829356 |

-----  
**ms-TS3**

Standard orientation:

-----  
Center Atomic Atomic Coordinates (Angstroms)

| Number | Number | Type | X         | Y         | Z         |
|--------|--------|------|-----------|-----------|-----------|
| 1      | 6      | 0    | 1.973493  | 0.247032  | -2.651522 |
| 2      | 6      | 0    | 1.373675  | -2.042498 | -1.704685 |
| 3      | 6      | 0    | 1.432385  | -0.515519 | -1.408679 |
| 4      | 8      | 0    | 0.237479  | -0.014051 | -1.013011 |
| 5      | 8      | 0    | 2.584497  | -2.592473 | -1.902036 |
| 6      | 6      | 0    | 2.608284  | -4.003255 | -2.190813 |
| 7      | 1      | 0    | 2.171839  | -4.565527 | -1.361006 |
| 8      | 1      | 0    | 2.050287  | -4.212171 | -3.107274 |
| 9      | 1      | 0    | 3.662255  | -4.253846 | -2.313986 |
| 10     | 8      | 0    | 0.339968  | -2.677479 | -1.752403 |
| 11     | 6      | 0    | 1.193192  | 1.300714  | -3.145026 |
| 12     | 6      | 0    | 1.606044  | 2.027132  | -4.265655 |
| 13     | 6      | 0    | 2.808095  | 1.715707  | -4.905325 |
| 14     | 6      | 0    | 3.183162  | -0.060227 | -3.295703 |
| 15     | 6      | 0    | 3.594649  | 0.669349  | -4.414361 |
| 16     | 1      | 0    | 0.265968  | 1.536620  | -2.636689 |
| 17     | 1      | 0    | 0.984877  | 2.840017  | -4.634385 |
| 18     | 1      | 0    | 3.129519  | 2.280583  | -5.777074 |
| 19     | 1      | 0    | 4.532311  | 0.414952  | -4.903419 |
| 20     | 1      | 0    | 3.803800  | -0.869380 | -2.929125 |
| 21     | 8      | 0    | 2.305678  | 1.095696  | 0.772928  |
| 22     | 15     | 0    | 2.596274  | -0.206427 | 0.073017  |
| 23     | 8      | 0    | 2.303091  | -1.516524 | 0.987294  |
| 24     | 6      | 0    | 2.965142  | -1.674829 | 2.257383  |
| 25     | 1      | 0    | 2.534139  | -2.566423 | 2.716936  |
| 26     | 1      | 0    | 4.039496  | -1.818271 | 2.106442  |
| 27     | 1      | 0    | 2.789673  | -0.803171 | 2.895944  |
| 28     | 8      | 0    | 4.177135  | -0.371025 | -0.260443 |
| 29     | 6      | 0    | 5.044887  | 0.777858  | -0.381804 |
| 30     | 1      | 0    | 6.062611  | 0.393419  | -0.287636 |
| 31     | 1      | 0    | 4.836471  | 1.501596  | 0.409750  |
| 32     | 1      | 0    | 4.911399  | 1.243424  | -1.362339 |
| 33     | 7      | 0    | 0.406595  | 3.275936  | -0.020266 |
| 34     | 6      | 0    | -0.772275 | 2.797109  | 0.496501  |
| 35     | 7      | 0    | -0.559386 | 1.699593  | 1.279658  |
| 36     | 16     | 0    | -2.310661 | 3.448839  | 0.210958  |
| 37     | 6      | 0    | 0.715393  | 4.414428  | -0.815086 |
| 38     | 6      | 0    | -1.536726 | 0.880395  | 1.998940  |
| 39     | 6      | 0    | -2.484322 | 0.078613  | 1.064825  |
| 40     | 6      | 0    | -3.615428 | -0.688995 | 1.802338  |
| 41     | 6      | 0    | -3.843093 | -2.055158 | 1.126601  |
| 42     | 7      | 0    | -1.720823 | -0.932209 | 0.226812  |
| 43     | 6      | 0    | -2.599844 | -1.333985 | -0.923224 |
| 44     | 6      | 0    | -3.968729 | -1.869583 | -0.414815 |
| 45     | 6      | 0    | -1.351243 | -2.154499 | 1.011491  |
| 46     | 6      | 0    | -2.620508 | -2.942134 | 1.414639  |
| 47     | 1      | 0    | 1.219591  | 2.682139  | 0.175661  |
| 48     | 6      | 0    | -2.229083 | 1.695164  | 3.132863  |
| 49     | 1      | 0    | -0.918505 | 0.130296  | 2.502840  |
| 50     | 1      | 0    | -4.536114 | -0.099831 | 1.784567  |
| 51     | 1      | 0    | -3.359407 | -0.844201 | 2.860074  |
| 52     | 1      | 0    | -2.044258 | -2.088817 | -1.481397 |
| 53     | 1      | 0    | -2.688712 | -0.457944 | -1.565344 |
| 54     | 6      | 0    | -5.232149 | -1.062812 | -0.781719 |
| 55     | 1      | 0    | -4.117990 | -2.874598 | -0.842490 |
| 56     | 1      | 0    | -0.681609 | -2.738161 | 0.378922  |
| 57     | 1      | 0    | -0.776603 | -1.829423 | 1.881982  |
| 58     | 1      | 0    | -2.584930 | -3.206055 | 2.478768  |
| 59     | 1      | 0    | -4.752979 | -2.521433 | 1.520417  |
| 60     | 1      | 0    | -2.688804 | -3.881825 | 0.852530  |

|    |   |   |           |           |           |
|----|---|---|-----------|-----------|-----------|
| 61 | 1 | 0 | 0.389302  | 1.326272  | 1.250599  |
| 62 | 1 | 0 | -0.693580 | -0.523973 | -0.315333 |
| 63 | 6 | 0 | -0.221611 | 5.360140  | -1.228023 |
| 64 | 6 | 0 | 0.183262  | 6.442600  | -1.992339 |
| 65 | 6 | 0 | 1.509560  | 6.603512  | -2.355014 |
| 66 | 6 | 0 | 2.444397  | 5.663569  | -1.943469 |
| 67 | 6 | 0 | 2.056638  | 4.579916  | -1.181529 |
| 68 | 1 | 0 | 2.785629  | 3.848871  | -0.859220 |
| 69 | 1 | 0 | 3.485472  | 5.776927  | -2.218767 |
| 70 | 1 | 0 | 1.815435  | 7.451852  | -2.951911 |
| 71 | 1 | 0 | -0.554315 | 7.170402  | -2.307536 |
| 72 | 1 | 0 | -1.253217 | 5.217586  | -0.939820 |
| 73 | 6 | 0 | -3.475098 | 2.210733  | 3.017712  |
| 74 | 6 | 0 | -4.055000 | 2.948119  | 4.096262  |
| 75 | 7 | 0 | -3.464070 | 3.186188  | 5.245016  |
| 76 | 6 | 0 | -2.162471 | 2.679002  | 5.370841  |
| 77 | 6 | 0 | -1.509207 | 1.948779  | 4.361935  |
| 78 | 6 | 0 | -1.491779 | 2.944991  | 6.606375  |
| 79 | 6 | 0 | -0.226912 | 2.510932  | 6.814064  |
| 80 | 6 | 0 | 0.445730  | 1.785470  | 5.792749  |
| 81 | 6 | 0 | -0.169293 | 1.515045  | 4.616209  |
| 82 | 1 | 0 | -4.054266 | 2.093401  | 2.114698  |
| 83 | 1 | 0 | -5.061121 | 3.342447  | 3.971225  |
| 84 | 1 | 0 | 0.369597  | 0.976355  | 3.851193  |
| 85 | 1 | 0 | 1.461958  | 1.452970  | 5.963289  |
| 86 | 1 | 0 | 0.283712  | 2.713769  | 7.746677  |
| 87 | 1 | 0 | -2.031914 | 3.506257  | 7.358271  |
| 88 | 1 | 0 | -2.911411 | 0.779490  | 0.346895  |
| 89 | 6 | 0 | -5.316203 | 0.056838  | -1.452129 |
| 90 | 1 | 0 | -6.140186 | -1.534511 | -0.421380 |
| 91 | 1 | 0 | -6.274742 | 0.516371  | -1.650256 |
| 92 | 1 | 0 | -4.461142 | 0.587618  | -1.845291 |

-----  
**ms-IM5**

Standard orientation:

| Center Number | Atomic Number | Atomic Type | Coordinates (Angstroms) |           |           |
|---------------|---------------|-------------|-------------------------|-----------|-----------|
|               |               |             | X                       | Y         | Z         |
| 1             | 6             | 0           | 2.179562                | 0.291975  | -2.746580 |
| 2             | 6             | 0           | 1.386939                | -1.988868 | -1.890632 |
| 3             | 6             | 0           | 1.527478                | -0.476222 | -1.575960 |
| 4             | 8             | 0           | 0.286511                | 0.096092  | -1.330315 |
| 5             | 8             | 0           | 2.572557                | -2.600854 | -2.033566 |
| 6             | 6             | 0           | 2.527824                | -4.013372 | -2.323002 |
| 7             | 1             | 0           | 2.021133                | -4.546007 | -1.514280 |
| 8             | 1             | 0           | 2.001308                | -4.188907 | -3.264356 |
| 9             | 1             | 0           | 3.570157                | -4.323464 | -2.397669 |
| 10            | 8             | 0           | 0.318569                | -2.550038 | -1.984961 |
| 11            | 6             | 0           | 1.500883                | 1.399761  | -3.275018 |
| 12            | 6             | 0           | 2.046803                | 2.120869  | -4.340674 |
| 13            | 6             | 0           | 3.275432                | 1.750164  | -4.890735 |
| 14            | 6             | 0           | 3.416133                | -0.076305 | -3.301317 |
| 15            | 6             | 0           | 3.956638                | 0.648268  | -4.366054 |
| 16            | 1             | 0           | 0.547174                | 1.687034  | -2.850341 |
| 17            | 1             | 0           | 1.504379                | 2.975309  | -4.737568 |
| 18            | 1             | 0           | 3.697324                | 2.311046  | -5.720936 |
| 19            | 1             | 0           | 4.912210                | 0.345113  | -4.787227 |
| 20            | 1             | 0           | 3.956224                | -0.929091 | -2.908614 |
| 21            | 8             | 0           | 2.250122                | 1.064788  | 0.705757  |
| 22            | 15            | 0           | 2.553213                | -0.228393 | 0.005511  |



|    |    |   |           |           |           |
|----|----|---|-----------|-----------|-----------|
| 23 | 8  | 0 | 2.148932  | -1.554868 | 0.833420  |
| 24 | 6  | 0 | 2.693031  | -1.796935 | 2.148298  |
| 25 | 1  | 0 | 2.186928  | -2.687119 | 2.524845  |
| 26 | 1  | 0 | 3.769333  | -1.980342 | 2.079189  |
| 27 | 1  | 0 | 2.496540  | -0.946779 | 2.808491  |
| 28 | 8  | 0 | 4.133338  | -0.438900 | -0.255804 |
| 29 | 6  | 0 | 5.056483  | 0.676505  | -0.284692 |
| 30 | 1  | 0 | 6.042393  | 0.249441  | -0.092168 |
| 31 | 1  | 0 | 4.798908  | 1.406304  | 0.485940  |
| 32 | 1  | 0 | 5.036392  | 1.144843  | -1.272203 |
| 33 | 7  | 0 | 0.330931  | 3.278514  | -0.021647 |
| 34 | 6  | 0 | -0.844376 | 2.786275  | 0.502330  |
| 35 | 7  | 0 | -0.620594 | 1.680194  | 1.268994  |
| 36 | 16 | 0 | -2.383672 | 3.435881  | 0.235782  |
| 37 | 6  | 0 | 0.627226  | 4.432719  | -0.797692 |
| 38 | 6  | 0 | -1.580175 | 0.867828  | 2.029228  |
| 39 | 6  | 0 | -2.534461 | 0.039853  | 1.127482  |
| 40 | 6  | 0 | -3.630295 | -0.739849 | 1.911564  |
| 41 | 6  | 0 | -3.845424 | -2.111525 | 1.240698  |
| 42 | 7  | 0 | -1.769826 | -0.925510 | 0.268177  |
| 43 | 6  | 0 | -2.673335 | -1.341763 | -0.838572 |
| 44 | 6  | 0 | -4.017093 | -1.931383 | -0.297810 |
| 45 | 6  | 0 | -1.361988 | -2.138024 | 1.024489  |
| 46 | 6  | 0 | -2.591717 | -2.965028 | 1.491962  |
| 47 | 1  | 0 | 1.150106  | 2.693025  | 0.163616  |
| 48 | 6  | 0 | -2.249474 | 1.705203  | 3.160344  |
| 49 | 1  | 0 | -0.944425 | 0.131696  | 2.532544  |
| 50 | 1  | 0 | -4.566043 | -0.173041 | 1.925185  |
| 51 | 1  | 0 | -3.337415 | -0.891987 | 2.961193  |
| 52 | 1  | 0 | -2.133396 | -2.082781 | -1.432796 |
| 53 | 1  | 0 | -2.828306 | -0.471185 | -1.478353 |
| 54 | 6  | 0 | -5.321275 | -1.174219 | -0.628451 |
| 55 | 1  | 0 | -4.144590 | -2.942443 | -0.720565 |
| 56 | 1  | 0 | -0.711555 | -2.723951 | 0.369839  |
| 57 | 1  | 0 | -0.751426 | -1.822037 | 1.876120  |
| 58 | 1  | 0 | -2.511341 | -3.216540 | 2.557877  |
| 59 | 1  | 0 | -4.732164 | -2.600925 | 1.660026  |
| 60 | 1  | 0 | -2.658790 | -3.913287 | 0.942520  |
| 61 | 1  | 0 | 0.340103  | 1.345742  | 1.281207  |
| 62 | 1  | 0 | -0.323340 | -0.388852 | -0.692960 |
| 63 | 6  | 0 | -0.322540 | 5.369268  | -1.203264 |
| 64 | 6  | 0 | 0.068822  | 6.467250  | -1.951865 |
| 65 | 6  | 0 | 1.394150  | 6.653180  | -2.307171 |
| 66 | 6  | 0 | 2.341315  | 5.722651  | -1.903479 |
| 67 | 6  | 0 | 1.966991  | 4.623591  | -1.156729 |
| 68 | 1  | 0 | 2.706426  | 3.900612  | -0.840298 |
| 69 | 1  | 0 | 3.381733  | 5.855483  | -2.172530 |
| 70 | 1  | 0 | 1.689298  | 7.513643  | -2.891945 |
| 71 | 1  | 0 | -0.678635 | 7.187586  | -2.261029 |
| 72 | 1  | 0 | -1.352682 | 5.206344  | -0.919863 |
| 73 | 6  | 0 | -3.506471 | 2.198465  | 3.066161  |
| 74 | 6  | 0 | -4.068033 | 2.959184  | 4.138085  |
| 75 | 7  | 0 | -3.450087 | 3.241869  | 5.262520  |
| 76 | 6  | 0 | -2.138742 | 2.755875  | 5.367602  |
| 77 | 6  | 0 | -1.503016 | 2.004321  | 4.363329  |
| 78 | 6  | 0 | -1.438748 | 3.066937  | 6.576259  |
| 79 | 6  | 0 | -0.163700 | 2.654091  | 6.763500  |
| 80 | 6  | 0 | 0.490366  | 1.904782  | 5.747442  |
| 81 | 6  | 0 | -0.152203 | 1.592779  | 4.596325  |
| 82 | 1  | 0 | -4.108842 | 2.043329  | 2.184223  |
| 83 | 1  | 0 | -5.083266 | 3.334751  | 4.029488  |
| 84 | 1  | 0 | 0.370738  | 1.033655  | 3.835025  |

|    |   |   |           |           |           |
|----|---|---|-----------|-----------|-----------|
| 85 | 1 | 0 | 1.513857  | 1.587247  | 5.901966  |
| 86 | 1 | 0 | 0.368463  | 2.890705  | 7.675833  |
| 87 | 1 | 0 | -1.965810 | 3.644065  | 7.325431  |
| 88 | 1 | 0 | -3.008454 | 0.735558  | 0.433787  |
| 89 | 6 | 0 | -5.468671 | -0.052987 | -1.285390 |
| 90 | 1 | 0 | -6.202353 | -1.683502 | -0.251419 |
| 91 | 1 | 0 | -6.449339 | 0.368967  | -1.456134 |
| 92 | 1 | 0 | -4.645219 | 0.515240  | -1.692458 |

***dr-IM3***

Standard orientation:

| Center<br>Number | Atomic<br>Number | Atomic<br>Type | Coordinates (Angstroms) |           |           |
|------------------|------------------|----------------|-------------------------|-----------|-----------|
|                  |                  |                | X                       | Y         | Z         |
| 1                | 1                | 0              | 3.334282                | -1.899683 | -5.641756 |
| 2                | 6                | 0              | 2.479306                | 0.677505  | -3.535398 |
| 3                | 6                | 0              | 3.983402                | 0.717154  | -3.185141 |
| 4                | 6                | 0              | 4.397114                | -0.663732 | -2.600102 |
| 5                | 6                | 0              | 3.850316                | -1.738395 | -3.575538 |
| 6                | 6                | 0              | 2.280024                | -0.189009 | -4.799803 |
| 7                | 6                | 0              | 4.666932                | -0.280360 | -5.373380 |
| 8                | 6                | 0              | 4.806877                | 0.964846  | -4.466132 |
| 9                | 7                | 0              | 3.503202                | -1.098682 | -4.895060 |
| 10               | 1                | 0              | 5.544590                | -0.931443 | -5.331347 |
| 11               | 1                | 0              | 4.485120                | -0.035059 | -6.422778 |
| 12               | 1                | 0              | 5.862066                | 1.136577  | -4.224605 |
| 13               | 1                | 0              | 4.445057                | 1.863682  | -4.979845 |
| 14               | 1                | 0              | 5.500501                | -0.702661 | -2.611918 |
| 15               | 1                | 0              | 2.943695                | -2.205590 | -3.201912 |
| 16               | 1                | 0              | 2.362444                | 0.431974  | -5.697363 |
| 17               | 1                | 0              | 2.094914                | 1.686162  | -3.712030 |
| 18               | 1                | 0              | 4.176048                | 1.508695  | -2.454016 |
| 19               | 1                | 0              | 1.905934                | 0.274911  | -2.696904 |
| 20               | 7                | 0              | -0.474633               | -2.735354 | -2.068935 |
| 21               | 6                | 0              | -0.226282               | -1.595356 | -2.794539 |
| 22               | 7                | 0              | 0.608790                | -1.857489 | -3.854459 |
| 23               | 16               | 0              | -0.829948               | -0.058183 | -2.456465 |
| 24               | 6                | 0              | -1.198357               | -2.970891 | -0.862724 |
| 25               | 6                | 0              | 0.965190                | -1.003221 | -4.995534 |
| 26               | 1                | 0              | -0.046691               | -3.581937 | -2.449634 |
| 27               | 6                | 0              | -1.211899               | -4.286110 | -0.385102 |
| 28               | 6                | 0              | -1.888514               | -4.600058 | 0.776583  |
| 29               | 6                | 0              | -2.562480               | -3.614226 | 1.484136  |
| 30               | 6                | 0              | -2.549979               | -2.312712 | 1.012213  |
| 31               | 6                | 0              | -1.875999               | -1.982277 | -0.152802 |
| 32               | 1                | 0              | -1.890192               | -5.622429 | 1.133375  |
| 33               | 1                | 0              | -3.092245               | -3.861882 | 2.393984  |
| 34               | 1                | 0              | -3.073663               | -1.536071 | 1.556009  |
| 35               | 1                | 0              | -1.859466               | -0.971777 | -0.534818 |
| 36               | 1                | 0              | -0.687294               | -5.055478 | -0.935193 |
| 37               | 6                | 0              | -0.228548               | 1.166784  | -5.658885 |
| 38               | 6                | 0              | -0.221936               | -0.184492 | -5.584414 |
| 39               | 6                | 0              | -1.334995               | 1.853204  | -6.247705 |
| 40               | 7                | 0              | -2.396492               | 1.269718  | -6.754163 |
| 41               | 6                | 0              | -2.396183               | -0.132476 | -6.703218 |
| 42               | 1                | 0              | 0.577101                | 1.766482  | -5.266628 |
| 43               | 1                | 0              | 4.572487                | -2.530695 | -3.786796 |
| 44               | 1                | 0              | 0.818387                | -2.842369 | -4.003498 |
| 45               | 1                | 0              | 1.228936                | -1.726956 | -5.778190 |
| 46               | 6                | 0              | 3.965544                | -0.841485 | -1.131241 |

|    |    |   |           |           |           |
|----|----|---|-----------|-----------|-----------|
| 47 | 6  | 0 | 3.475723  | -1.922590 | -0.581595 |
| 48 | 1  | 0 | 3.230260  | -1.947517 | 0.471371  |
| 49 | 1  | 0 | 3.291223  | -2.839183 | -1.125000 |
| 50 | 1  | 0 | 4.140480  | 0.040007  | -0.524516 |
| 51 | 6  | 0 | -1.351799 | -0.892825 | -6.147646 |
| 52 | 6  | 0 | -1.467150 | -2.318116 | -6.190404 |
| 53 | 6  | 0 | -3.533613 | -0.790626 | -7.267875 |
| 54 | 6  | 0 | -3.612724 | -2.141790 | -7.282731 |
| 55 | 6  | 0 | -2.553503 | -2.916790 | -6.736270 |
| 56 | 1  | 0 | -1.309492 | 2.940226  | -6.280982 |
| 57 | 1  | 0 | -0.674290 | -2.929988 | -5.787363 |
| 58 | 1  | 0 | -2.620654 | -3.997061 | -6.762672 |
| 59 | 1  | 0 | -4.471668 | -2.642317 | -7.711242 |
| 60 | 1  | 0 | -4.317807 | -0.169153 | -7.680970 |
| 61 | 8  | 0 | 4.124022  | -4.981468 | -7.814854 |
| 62 | 8  | 0 | 3.147660  | -2.856583 | -6.722645 |
| 63 | 15 | 0 | 3.060544  | -4.422120 | -6.610787 |
| 64 | 6  | 0 | 5.481176  | -4.567811 | -7.747872 |
| 65 | 1  | 0 | 5.575295  | -3.485860 | -7.907357 |
| 66 | 1  | 0 | 6.020512  | -5.095956 | -8.540479 |
| 67 | 1  | 0 | 5.940219  | -4.827646 | -6.780452 |
| 68 | 8  | 0 | 1.663558  | -4.875388 | -7.420212 |
| 69 | 6  | 0 | 1.385287  | -4.380445 | -8.738930 |
| 70 | 1  | 0 | 1.507665  | -3.292532 | -8.780474 |
| 71 | 1  | 0 | 2.050789  | -4.849532 | -9.470936 |
| 72 | 1  | 0 | 0.346160  | -4.640417 | -8.962913 |
| 73 | 6  | 0 | 1.433928  | -5.800829 | -4.024730 |
| 74 | 6  | 0 | 2.771150  | -5.742694 | -3.235765 |
| 75 | 8  | 0 | 0.629999  | -4.883707 | -3.976787 |
| 76 | 8  | 0 | 2.865308  | -4.815527 | -2.444936 |
| 77 | 8  | 0 | 1.211437  | -6.955730 | -4.636990 |
| 78 | 6  | 0 | -0.001526 | -7.046059 | -5.428703 |
| 79 | 1  | 0 | -0.871036 | -6.835984 | -4.801819 |
| 80 | 1  | 0 | 0.068568  | -6.331815 | -6.251950 |
| 81 | 1  | 0 | -0.021008 | -8.072329 | -5.794503 |
| 82 | 6  | 0 | 3.820729  | -6.792317 | -3.348349 |
| 83 | 6  | 0 | 4.038060  | -7.569526 | -4.499900 |
| 84 | 6  | 0 | 5.069226  | -8.508821 | -4.522627 |
| 85 | 6  | 0 | 5.881545  | -8.694741 | -3.399962 |
| 86 | 6  | 0 | 4.655056  | -6.973078 | -2.228443 |
| 87 | 6  | 0 | 5.671355  | -7.925183 | -2.250133 |
| 88 | 1  | 0 | 3.426431  | -7.419432 | -5.380047 |
| 89 | 1  | 0 | 5.240058  | -9.093634 | -5.422427 |
| 90 | 1  | 0 | 6.678035  | -9.434506 | -3.421384 |
| 91 | 1  | 0 | 6.299467  | -8.067087 | -1.374576 |
| 92 | 1  | 0 | 4.486475  | -6.363428 | -1.346041 |

-----  
**dr-TS2**

Standard orientation:

| Center<br>Number | Atomic<br>Number | Atomic<br>Type | Coordinates (Angstroms) |           |           |
|------------------|------------------|----------------|-------------------------|-----------|-----------|
|                  |                  |                | X                       | Y         | Z         |
| 1                | 1                | 0              | 3.531925                | -1.947356 | -5.344216 |
| 2                | 6                | 0              | 2.602629                | 0.751348  | -3.519217 |
| 3                | 6                | 0              | 4.106732                | 0.883954  | -3.187243 |
| 4                | 6                | 0              | 4.578633                | -0.417193 | -2.480086 |
| 5                | 6                | 0              | 4.045816                | -1.594718 | -3.329029 |
| 6                | 6                | 0              | 2.438023                | -0.205932 | -4.718112 |
| 7                | 6                | 0              | 4.833259                | -0.303202 | -5.269931 |
| 8                | 6                | 0              | 4.916242                | 1.033650  | -4.493379 |

|    |    |   |           |           |           |
|----|----|---|-----------|-----------|-----------|
| 9  | 7  | 0 | 3.685606  | -1.101809 | -4.714043 |
| 10 | 1  | 0 | 5.729908  | -0.916966 | -5.148519 |
| 11 | 1  | 0 | 4.656054  | -0.173719 | -6.340352 |
| 12 | 1  | 0 | 5.963574  | 1.272244  | -4.276740 |
| 13 | 1  | 0 | 4.517347  | 1.858258  | -5.095964 |
| 14 | 1  | 0 | 5.682301  | -0.422166 | -2.510358 |
| 15 | 1  | 0 | 3.145943  | -2.035640 | -2.917285 |
| 16 | 1  | 0 | 2.533690  | 0.347918  | -5.657895 |
| 17 | 1  | 0 | 2.175675  | 1.727436  | -3.763907 |
| 18 | 1  | 0 | 4.274025  | 1.750401  | -2.539953 |
| 19 | 1  | 0 | 2.043934  | 0.380875  | -2.654914 |
| 20 | 7  | 0 | -0.502340 | -2.880574 | -2.185199 |
| 21 | 6  | 0 | -0.122383 | -1.688322 | -2.752934 |
| 22 | 7  | 0 | 0.823257  | -1.892846 | -3.723877 |
| 23 | 16 | 0 | -0.714977 | -0.160349 | -2.347791 |
| 24 | 6  | 0 | -1.229866 | -3.183437 | -0.999261 |
| 25 | 6  | 0 | 1.146054  | -1.057894 | -4.881540 |
| 26 | 1  | 0 | -0.223702 | -3.708239 | -2.722097 |
| 27 | 6  | 0 | -1.471179 | -4.536106 | -0.733779 |
| 28 | 6  | 0 | -2.153621 | -4.912675 | 0.405790  |
| 29 | 6  | 0 | -2.606004 | -3.954506 | 1.302359  |
| 30 | 6  | 0 | -2.367273 | -2.615919 | 1.041132  |
| 31 | 6  | 0 | -1.685523 | -2.222199 | -0.099058 |
| 32 | 1  | 0 | -2.333916 | -5.963187 | 0.596886  |
| 33 | 1  | 0 | -3.140982 | -4.251465 | 2.194130  |
| 34 | 1  | 0 | -2.717840 | -1.859907 | 1.732952  |
| 35 | 1  | 0 | -1.506830 | -1.180039 | -0.319509 |
| 36 | 1  | 0 | -1.118101 | -5.282967 | -1.431939 |
| 37 | 6  | 0 | -0.092755 | 1.064045  | -5.614330 |
| 38 | 6  | 0 | -0.065372 | -0.281971 | -5.479093 |
| 39 | 6  | 0 | -1.217595 | 1.708729  | -6.216124 |
| 40 | 7  | 0 | -2.276964 | 1.089176  | -6.681019 |
| 41 | 6  | 0 | -2.256032 | -0.309672 | -6.567611 |
| 42 | 1  | 0 | 0.710470  | 1.693118  | -5.267484 |
| 43 | 1  | 0 | 4.771554  | -2.398843 | -3.464273 |
| 44 | 1  | 0 | 1.231604  | -2.834704 | -3.761430 |
| 45 | 1  | 0 | 1.421108  | -1.787688 | -5.655852 |
| 46 | 6  | 0 | 4.182221  | -0.460834 | -0.991644 |
| 47 | 6  | 0 | 3.644923  | -1.462537 | -0.344712 |
| 48 | 1  | 0 | 3.427522  | -1.390980 | 0.712270  |
| 49 | 1  | 0 | 3.389747  | -2.404988 | -0.808559 |
| 50 | 1  | 0 | 4.424549  | 0.453778  | -0.461937 |
| 51 | 6  | 0 | -1.193673 | -1.030496 | -5.993283 |
| 52 | 6  | 0 | -1.289972 | -2.457139 | -5.968797 |
| 53 | 6  | 0 | -3.391261 | -1.006841 | -7.086665 |
| 54 | 6  | 0 | -3.452048 | -2.358416 | -7.039119 |
| 55 | 6  | 0 | -2.376085 | -3.093481 | -6.471555 |
| 56 | 1  | 0 | -1.207230 | 2.793387  | -6.297964 |
| 57 | 1  | 0 | -0.487689 | -3.041492 | -5.543815 |
| 58 | 1  | 0 | -2.429179 | -4.174396 | -6.443650 |
| 59 | 1  | 0 | -4.310078 | -2.888720 | -7.432315 |
| 60 | 1  | 0 | -4.189139 | -0.414816 | -7.516279 |
| 61 | 8  | 0 | 3.866556  | -5.355668 | -7.613825 |
| 62 | 8  | 0 | 3.373232  | -3.086281 | -6.466711 |
| 63 | 15 | 0 | 2.868796  | -4.543540 | -6.546180 |
| 64 | 6  | 0 | 5.283503  | -5.164714 | -7.563457 |
| 65 | 1  | 0 | 5.535000  | -4.099895 | -7.613218 |
| 66 | 1  | 0 | 5.696812  | -5.681440 | -8.434089 |
| 67 | 1  | 0 | 5.709663  | -5.602418 | -6.652091 |
| 68 | 8  | 0 | 1.478981  | -4.618222 | -7.433345 |
| 69 | 6  | 0 | 1.403912  | -4.046186 | -8.751196 |
| 70 | 1  | 0 | 1.736604  | -3.002520 | -8.740381 |

|    |   |   |           |           |           |
|----|---|---|-----------|-----------|-----------|
| 71 | 1 | 0 | 2.018751  | -4.622045 | -9.450131 |
| 72 | 1 | 0 | 0.354072  | -4.094590 | -9.050668 |
| 73 | 6 | 0 | 1.043648  | -5.794750 | -4.528391 |
| 74 | 6 | 0 | 2.471816  | -5.307286 | -4.198926 |
| 75 | 8 | 0 | 0.062664  | -5.136162 | -4.223692 |
| 76 | 8 | 0 | 2.516590  | -4.229008 | -3.558100 |
| 77 | 8 | 0 | 0.970807  | -6.987047 | -5.128430 |
| 78 | 6 | 0 | -0.346559 | -7.428833 | -5.514183 |
| 79 | 1 | 0 | -0.998173 | -7.491572 | -4.639123 |
| 80 | 1 | 0 | -0.768983 | -6.732322 | -6.242463 |
| 81 | 1 | 0 | -0.198851 | -8.412978 | -5.959491 |
| 82 | 6 | 0 | 3.587827  | -6.317254 | -4.014491 |
| 83 | 6 | 0 | 3.829817  | -7.416431 | -4.855629 |
| 84 | 6 | 0 | 4.872130  | -8.301696 | -4.578437 |
| 85 | 6 | 0 | 5.689899  | -8.109440 | -3.459481 |
| 86 | 6 | 0 | 4.417084  | -6.129338 | -2.896482 |
| 87 | 6 | 0 | 5.457465  | -7.018734 | -2.618296 |
| 88 | 1 | 0 | 3.218519  | -7.570128 | -5.736267 |
| 89 | 1 | 0 | 5.049106  | -9.143454 | -5.243673 |
| 90 | 1 | 0 | 6.499323  | -8.803796 | -3.247333 |
| 91 | 1 | 0 | 6.082136  | -6.860959 | -1.742187 |
| 92 | 1 | 0 | 4.224238  | -5.282169 | -2.246416 |

***dr-IM4***

Standard orientation:

| Center Number | Atomic Number | Atomic Type | Coordinates (Angstroms) |           |           |
|---------------|---------------|-------------|-------------------------|-----------|-----------|
|               |               |             | X                       | Y         | Z         |
| 1             | 1             | 0           | 3.362057                | -2.450080 | -4.499233 |
| 2             | 6             | 0           | 2.695493                | 0.787944  | -3.731684 |
| 3             | 6             | 0           | 4.141577                | 0.818978  | -3.180181 |
| 4             | 6             | 0           | 4.273567                | -0.261451 | -2.074413 |
| 5             | 6             | 0           | 3.652124                | -1.545452 | -2.665414 |
| 6             | 6             | 0           | 2.542703                | -0.441832 | -4.659612 |
| 7             | 6             | 0           | 4.934805                | -1.016075 | -4.699888 |
| 8             | 6             | 0           | 5.137609                | 0.468785  | -4.309020 |
| 9             | 7             | 0           | 3.595767                | -1.451630 | -4.178075 |
| 10            | 1             | 0           | 5.678816                | -1.674742 | -4.242994 |
| 11            | 1             | 0           | 4.939125                | -1.202397 | -5.774793 |
| 12            | 1             | 0           | 6.169315                | 0.629306  | -3.975846 |
| 13            | 1             | 0           | 4.976712                | 1.123217  | -5.174432 |
| 14            | 1             | 0           | 5.351814                | -0.427516 | -1.904963 |
| 15            | 1             | 0           | 2.630383                | -1.701372 | -2.333572 |
| 16            | 1             | 0           | 2.882202                | -0.169060 | -5.664690 |
| 17            | 1             | 0           | 2.511965                | 1.702123  | -4.301403 |
| 18            | 1             | 0           | 4.365028                | 1.810899  | -2.774560 |
| 19            | 1             | 0           | 1.961638                | 0.760639  | -2.920207 |
| 20            | 7             | 0           | -0.432482               | -3.006363 | -2.160204 |
| 21            | 6             | 0           | -0.101159               | -1.821211 | -2.781838 |
| 22            | 7             | 0           | 0.778105                | -2.045844 | -3.794574 |
| 23            | 16            | 0           | -0.674524               | -0.282794 | -2.376719 |
| 24            | 6             | 0           | -1.132625               | -3.291365 | -0.954424 |
| 25            | 6             | 0           | 1.185070                | -1.181998 | -4.898024 |
| 26            | 1             | 0           | -0.118658               | -3.841366 | -2.663522 |
| 27            | 6             | 0           | -1.272279               | -4.640165 | -0.607871 |
| 28            | 6             | 0           | -1.928641               | -4.996969 | 0.553114  |
| 29            | 6             | 0           | -2.455339               | -4.023048 | 1.390338  |
| 30            | 6             | 0           | -2.317662               | -2.688581 | 1.048075  |
| 31            | 6             | 0           | -1.663518               | -2.314279 | -0.114584 |
| 32            | 1             | 0           | -2.029736               | -6.044514 | 0.808084  |

|    |    |   |           |           |           |
|----|----|---|-----------|-----------|-----------|
| 33 | 1  | 0 | -2.969235 | -4.305086 | 2.299161  |
| 34 | 1  | 0 | -2.727131 | -1.920909 | 1.693118  |
| 35 | 1  | 0 | -1.557779 | -1.277537 | -0.400277 |
| 36 | 1  | 0 | -0.860612 | -5.398854 | -1.259944 |
| 37 | 6  | 0 | 0.079439  | 0.977433  | -5.739980 |
| 38 | 6  | 0 | 0.027245  | -0.358508 | -5.535890 |
| 39 | 6  | 0 | -1.008313 | 1.660872  | -6.367826 |
| 40 | 7  | 0 | -2.107839 | 1.088030  | -6.796122 |
| 41 | 6  | 0 | -2.167244 | -0.303983 | -6.621885 |
| 42 | 1  | 0 | 0.921604  | 1.572480  | -5.433516 |
| 43 | 1  | 0 | 4.222393  | -2.447598 | -2.438657 |
| 44 | 1  | 0 | 1.240250  | -2.972304 | -3.863525 |
| 45 | 1  | 0 | 1.461369  | -1.913852 | -5.670557 |
| 46 | 6  | 0 | 3.680179  | 0.187460  | -0.725398 |
| 47 | 6  | 0 | 2.904681  | -0.506333 | 0.066991  |
| 48 | 1  | 0 | 2.561836  | -0.099889 | 1.008697  |
| 49 | 1  | 0 | 2.562632  | -1.506684 | -0.158028 |
| 50 | 1  | 0 | 3.996691  | 1.182411  | -0.432793 |
| 51 | 6  | 0 | -1.145096 | -1.061474 | -6.022638 |
| 52 | 6  | 0 | -1.321242 | -2.479307 | -5.953187 |
| 53 | 6  | 0 | -3.344408 | -0.952796 | -7.109018 |
| 54 | 6  | 0 | -3.482804 | -2.296006 | -7.013125 |
| 55 | 6  | 0 | -2.444725 | -3.070424 | -6.428859 |
| 56 | 1  | 0 | -0.931306 | 2.737817  | -6.500877 |
| 57 | 1  | 0 | -0.544632 | -3.089939 | -5.518490 |
| 58 | 1  | 0 | -2.557793 | -4.145264 | -6.366724 |
| 59 | 1  | 0 | -4.372822 | -2.789676 | -7.382098 |
| 60 | 1  | 0 | -4.109655 | -0.331182 | -7.555829 |
| 61 | 8  | 0 | 3.464553  | -5.563765 | -7.829974 |
| 62 | 8  | 0 | 3.879070  | -3.198163 | -6.831968 |
| 63 | 15 | 0 | 2.989489  | -4.406053 | -6.785431 |
| 64 | 6  | 0 | 4.829989  | -5.639290 | -8.288692 |
| 65 | 1  | 0 | 5.240297  | -4.637987 | -8.440917 |
| 66 | 1  | 0 | 4.802202  | -6.186835 | -9.233658 |
| 67 | 1  | 0 | 5.436833  | -6.185706 | -7.560362 |
| 68 | 8  | 0 | 1.462658  | -4.138269 | -7.269673 |
| 69 | 6  | 0 | 1.200528  | -3.599898 | -8.579064 |
| 70 | 1  | 0 | 1.742347  | -2.659722 | -8.724867 |
| 71 | 1  | 0 | 1.490661  | -4.322711 | -9.348089 |
| 72 | 1  | 0 | 0.125061  | -3.419528 | -8.624119 |
| 73 | 6  | 0 | 1.299952  | -5.714278 | -4.905505 |
| 74 | 6  | 0 | 2.700593  | -5.026688 | -4.999920 |
| 75 | 8  | 0 | 0.421517  | -5.329154 | -4.157075 |
| 76 | 8  | 0 | 2.699129  | -3.902435 | -4.251930 |
| 77 | 8  | 0 | 1.158698  | -6.772771 | -5.717119 |
| 78 | 6  | 0 | -0.113387 | -7.448068 | -5.678442 |
| 79 | 1  | 0 | -0.297523 | -7.852261 | -4.679531 |
| 80 | 1  | 0 | -0.915234 | -6.755109 | -5.945664 |
| 81 | 1  | 0 | -0.035168 | -8.251107 | -6.411895 |
| 82 | 6  | 0 | 3.802736  | -6.044322 | -4.590566 |
| 83 | 6  | 0 | 4.043718  | -7.256595 | -5.257669 |
| 84 | 6  | 0 | 5.050091  | -8.121099 | -4.818599 |
| 85 | 6  | 0 | 5.829370  | -7.794201 | -3.704612 |
| 86 | 6  | 0 | 4.586678  | -5.727549 | -3.474658 |
| 87 | 6  | 0 | 5.590039  | -6.593855 | -3.031837 |
| 88 | 1  | 0 | 3.444429  | -7.528714 | -6.118780 |
| 89 | 1  | 0 | 5.221506  | -9.055591 | -5.348262 |
| 90 | 1  | 0 | 6.609681  | -8.470158 | -3.363195 |
| 91 | 1  | 0 | 6.182262  | -6.331034 | -2.158041 |
| 92 | 1  | 0 | 4.380753  | -4.797756 | -2.956680 |

*dr-TS3*

Standard orientation:

| Center<br>Number | Atomic<br>Number | Atomic<br>Type | Coordinates (Angstroms) |           |           |
|------------------|------------------|----------------|-------------------------|-----------|-----------|
|                  |                  |                | X                       | Y         | Z         |
| 1                | 1                | 0              | 3.319376                | -2.870587 | -4.439105 |
| 2                | 6                | 0              | 2.751833                | 0.659237  | -3.724612 |
| 3                | 6                | 0              | 4.190763                | 0.687241  | -3.156468 |
| 4                | 6                | 0              | 4.297562                | -0.376199 | -2.034345 |
| 5                | 6                | 0              | 3.673936                | -1.665260 | -2.624002 |
| 6                | 6                | 0              | 2.602050                | -0.598848 | -4.619225 |
| 7                | 6                | 0              | 4.962181                | -1.187540 | -4.635098 |
| 8                | 6                | 0              | 5.193587                | 0.303465  | -4.266929 |
| 9                | 7                | 0              | 3.625035                | -1.615584 | -4.128234 |
| 10               | 1                | 0              | 5.705628                | -1.841911 | -4.167467 |
| 11               | 1                | 0              | 4.987143                | -1.377559 | -5.709665 |
| 12               | 1                | 0              | 6.224276                | 0.455776  | -3.924154 |
| 13               | 1                | 0              | 5.051676                | 0.947658  | -5.144187 |
| 14               | 1                | 0              | 5.372465                | -0.547709 | -1.845968 |
| 15               | 1                | 0              | 2.652659                | -1.808427 | -2.280954 |
| 16               | 1                | 0              | 2.940410                | -0.345391 | -5.630558 |
| 17               | 1                | 0              | 2.587125                | 1.563715  | -4.316535 |
| 18               | 1                | 0              | 4.419363                | 1.684327  | -2.764873 |
| 19               | 1                | 0              | 2.010701                | 0.663695  | -2.918977 |
| 20               | 7                | 0              | -0.501443               | -3.009742 | -2.096005 |
| 21               | 6                | 0              | -0.135583               | -1.850687 | -2.753397 |
| 22               | 7                | 0              | 0.765554                | -2.122338 | -3.735215 |
| 23               | 16               | 0              | -0.700219               | -0.296274 | -2.418589 |
| 24               | 6                | 0              | -1.242932               | -3.242479 | -0.903033 |
| 25               | 6                | 0              | 1.225031                | -1.302414 | -4.858749 |
| 26               | 1                | 0              | -0.184778               | -3.866711 | -2.553254 |
| 27               | 6                | 0              | -1.415733               | -4.575743 | -0.515094 |
| 28               | 6                | 0              | -2.113997               | -4.881963 | 0.636013  |
| 29               | 6                | 0              | -2.650399               | -3.871509 | 1.421811  |
| 30               | 6                | 0              | -2.479473               | -2.551883 | 1.038586  |
| 31               | 6                | 0              | -1.783013               | -2.228334 | -0.114603 |
| 32               | 1                | 0              | -2.240234               | -5.918361 | 0.923295  |
| 33               | 1                | 0              | -3.197185               | -4.113624 | 2.322930  |
| 34               | 1                | 0              | -2.895690               | -1.755843 | 1.643725  |
| 35               | 1                | 0              | -1.650226               | -1.203915 | -0.431856 |
| 36               | 1                | 0              | -0.996411               | -5.363669 | -1.126224 |
| 37               | 6                | 0              | 0.176811                | 0.853041  | -5.780090 |
| 38               | 6                | 0              | 0.094150                | -0.475646 | -5.541178 |
| 39               | 6                | 0              | -0.882948               | 1.540596  | -6.450115 |
| 40               | 7                | 0              | -1.984665               | 0.978925  | -6.888123 |
| 41               | 6                | 0              | -2.075621               | -0.406306 | -6.678198 |
| 42               | 1                | 0              | 1.024636                | 1.438306  | -5.470334 |
| 43               | 1                | 0              | 4.242681                | -2.558942 | -2.354098 |
| 44               | 1                | 0              | 1.169332                | -3.063585 | -3.774330 |
| 45               | 1                | 0              | 1.488919                | -2.064998 | -5.603234 |
| 46               | 6                | 0              | 3.691463                | 0.097293  | -0.698501 |
| 47               | 6                | 0              | 2.933710                | -0.593959 | 0.113191  |
| 48               | 1                | 0              | 2.579497                | -0.173338 | 1.044135  |
| 49               | 1                | 0              | 2.618788                | -1.607999 | -0.087167 |
| 50               | 1                | 0              | 3.980703                | 1.107723  | -0.430145 |
| 51               | 6                | 0              | -1.082356               | -1.166849 | -6.036237 |
| 52               | 6                | 0              | -1.290173               | -2.578597 | -5.934343 |
| 53               | 6                | 0              | -3.254845               | -1.044837 | -7.174599 |
| 54               | 6                | 0              | -3.423277               | -2.381867 | -7.047063 |
| 55               | 6                | 0              | -2.414250               | -3.160593 | -6.419417 |
| 56               | 1                | 0              | -0.781197               | 2.611905  | -6.609941 |

|    |    |   |           |           |           |
|----|----|---|-----------|-----------|-----------|
| 57 | 1  | 0 | -0.536050 | -3.192639 | -5.466691 |
| 58 | 1  | 0 | -2.550690 | -4.230928 | -6.331745 |
| 59 | 1  | 0 | -4.314805 | -2.867400 | -7.422904 |
| 60 | 1  | 0 | -3.997247 | -0.420230 | -7.654679 |
| 61 | 8  | 0 | 3.529790  | -5.613083 | -7.889772 |
| 62 | 8  | 0 | 3.976317  | -3.223071 | -6.961600 |
| 63 | 15 | 0 | 3.089783  | -4.423443 | -6.877562 |
| 64 | 6  | 0 | 4.868358  | -5.684154 | -8.429787 |
| 65 | 1  | 0 | 5.290320  | -4.683011 | -8.543546 |
| 66 | 1  | 0 | 4.778169  | -6.173219 | -9.402247 |
| 67 | 1  | 0 | 5.497133  | -6.284076 | -7.765865 |
| 68 | 8  | 0 | 1.543859  | -4.182701 | -7.290705 |
| 69 | 6  | 0 | 1.213857  | -3.638123 | -8.584986 |
| 70 | 1  | 0 | 1.734570  | -2.689102 | -8.745455 |
| 71 | 1  | 0 | 1.479361  | -4.352285 | -9.370600 |
| 72 | 1  | 0 | 0.135233  | -3.474767 | -8.577345 |
| 73 | 6  | 0 | 1.500323  | -5.773508 | -4.952528 |
| 74 | 6  | 0 | 2.875023  | -5.050153 | -5.096817 |
| 75 | 8  | 0 | 0.628762  | -5.400271 | -4.193233 |
| 76 | 8  | 0 | 2.810011  | -3.937958 | -4.292381 |
| 77 | 8  | 0 | 1.382965  | -6.846864 | -5.744834 |
| 78 | 6  | 0 | 0.134371  | -7.564469 | -5.672385 |
| 79 | 1  | 0 | -0.016436 | -7.958583 | -4.664121 |
| 80 | 1  | 0 | -0.694362 | -6.902465 | -5.935342 |
| 81 | 1  | 0 | 0.227641  | -8.375294 | -6.395073 |
| 82 | 6  | 0 | 4.030399  | -6.007321 | -4.704638 |
| 83 | 6  | 0 | 4.282116  | -7.227003 | -5.354954 |
| 84 | 6  | 0 | 5.334290  | -8.047979 | -4.941983 |
| 85 | 6  | 0 | 6.151746  | -7.669718 | -3.872882 |
| 86 | 6  | 0 | 4.851787  | -5.639842 | -3.631570 |
| 87 | 6  | 0 | 5.903132  | -6.462272 | -3.217615 |
| 88 | 1  | 0 | 3.654950  | -7.539572 | -6.181116 |
| 89 | 1  | 0 | 5.511309  | -8.989213 | -5.457285 |
| 90 | 1  | 0 | 6.968521  | -8.311602 | -3.552239 |
| 91 | 1  | 0 | 6.524651  | -6.157807 | -2.378838 |
| 92 | 1  | 0 | 4.645049  | -4.710133 | -3.115531 |

*dr-IM5*

Standard orientation:

| Center Number | Atomic Number | Atomic Type | Coordinates (Angstroms) |           |          |
|---------------|---------------|-------------|-------------------------|-----------|----------|
|               |               |             | X                       | Y         | Z        |
| 1             | 1             | 0           | 1.491299                | -0.351065 | 1.148083 |
| 2             | 6             | 0           | -1.962636               | -0.242341 | 3.466669 |
| 3             | 6             | 0           | -1.270048               | -1.159790 | 4.502985 |
| 4             | 6             | 0           | -0.754376               | -2.422790 | 3.767477 |
| 5             | 6             | 0           | 0.000656                | -1.891055 | 2.514684 |
| 6             | 6             | 0           | -0.856093               | 0.436081  | 2.615637 |
| 7             | 6             | 0           | 1.006614                | -0.254952 | 3.970021 |
| 8             | 6             | 0           | -0.046190               | -0.433466 | 5.104201 |
| 9             | 7             | 0           | 0.366858                | -0.449091 | 2.646128 |
| 10            | 1             | 0           | 1.813086                | -0.992702 | 4.055686 |
| 11            | 1             | 0           | 1.474336                | 0.734333  | 3.987686 |
| 12            | 1             | 0           | 0.374254                | -1.013660 | 5.935645 |
| 13            | 1             | 0           | -0.349185               | 0.538401  | 5.516215 |
| 14            | 1             | 0           | -0.032660               | -2.921771 | 4.439574 |
| 15            | 1             | 0           | -0.611382               | -1.992558 | 1.620665 |
| 16            | 1             | 0           | -0.542002               | 1.352856  | 3.130932 |
| 17            | 1             | 0           | -2.565029               | 0.506278  | 3.990029 |
| 18            | 1             | 0           | -1.977347               | -1.435819 | 5.293023 |



|    |    |   |           |           |           |
|----|----|---|-----------|-----------|-----------|
| 19 | 1  | 0 | -2.652146 | -0.814854 | 2.837838  |
| 20 | 7  | 0 | -2.098297 | -1.460165 | -1.476477 |
| 21 | 6  | 0 | -2.412626 | -0.701466 | -0.363509 |
| 22 | 7  | 0 | -1.289902 | -0.152425 | 0.177108  |
| 23 | 16 | 0 | -3.958051 | -0.456362 | 0.263109  |
| 24 | 6  | 0 | -2.861374 | -2.371351 | -2.260062 |
| 25 | 6  | 0 | -1.134170 | 0.926783  | 1.159952  |
| 26 | 1  | 0 | -1.144165 | -1.333374 | -1.817782 |
| 27 | 6  | 0 | -2.217266 | -2.958575 | -3.354688 |
| 28 | 6  | 0 | -2.886259 | -3.863389 | -4.154888 |
| 29 | 6  | 0 | -4.204024 | -4.202084 | -3.881923 |
| 30 | 6  | 0 | -4.842086 | -3.621983 | -2.798324 |
| 31 | 6  | 0 | -4.185023 | -2.711487 | -1.986857 |
| 32 | 1  | 0 | -2.374680 | -4.308982 | -4.998873 |
| 33 | 1  | 0 | -4.726413 | -4.910613 | -4.510135 |
| 34 | 1  | 0 | -5.870957 | -3.878232 | -2.577205 |
| 35 | 1  | 0 | -4.673866 | -2.242312 | -1.145127 |
| 36 | 1  | 0 | -1.189535 | -2.696513 | -3.567044 |
| 37 | 6  | 0 | -2.902964 | 2.588787  | 1.987337  |
| 38 | 6  | 0 | -2.148790 | 2.096515  | 0.977681  |
| 39 | 6  | 0 | -3.780636 | 3.696169  | 1.769314  |
| 40 | 7  | 0 | -3.929292 | 4.324845  | 0.627063  |
| 41 | 6  | 0 | -3.130642 | 3.850390  | -0.425373 |
| 42 | 1  | 0 | -2.879129 | 2.164678  | 2.976271  |
| 43 | 1  | 0 | 0.925781  | -2.452550 | 2.344409  |
| 44 | 1  | 0 | -0.392575 | -0.445727 | -0.208054 |
| 45 | 1  | 0 | -0.163830 | 1.359619  | 0.878379  |
| 46 | 6  | 0 | -1.868405 | -3.451693 | 3.487550  |
| 47 | 6  | 0 | -2.038130 | -4.151806 | 2.395648  |
| 48 | 1  | 0 | -2.839930 | -4.871643 | 2.308063  |
| 49 | 1  | 0 | -1.400980 | -4.059023 | 1.528154  |
| 50 | 1  | 0 | -2.538985 | -3.603370 | 4.327023  |
| 51 | 6  | 0 | -2.235670 | 2.772882  | -0.303416 |
| 52 | 6  | 0 | -1.451502 | 2.429704  | -1.449602 |
| 53 | 6  | 0 | -3.252227 | 4.539967  | -1.672378 |
| 54 | 6  | 0 | -2.503162 | 4.177267  | -2.739848 |
| 55 | 6  | 0 | -1.580574 | 3.103637  | -2.618524 |
| 56 | 1  | 0 | -4.379412 | 4.051024  | 2.605550  |
| 57 | 1  | 0 | -0.740673 | 1.620936  | -1.380326 |
| 58 | 1  | 0 | -0.976822 | 2.826789  | -3.473313 |
| 59 | 1  | 0 | -2.593262 | 4.698534  | -3.684237 |
| 60 | 1  | 0 | -3.959076 | 5.358210  | -1.724342 |
| 61 | 8  | 0 | 4.516445  | 1.993137  | -0.518967 |
| 62 | 8  | 0 | 3.048408  | 1.544366  | 1.588518  |
| 63 | 15 | 0 | 3.104956  | 1.506772  | 0.099298  |
| 64 | 6  | 0 | 5.712012  | 2.068169  | 0.294454  |
| 65 | 1  | 0 | 5.454364  | 2.259981  | 1.338203  |
| 66 | 1  | 0 | 6.303444  | 2.891074  | -0.112094 |
| 67 | 1  | 0 | 6.265125  | 1.129077  | 0.209687  |
| 68 | 8  | 0 | 2.034704  | 2.418575  | -0.689377 |
| 69 | 6  | 0 | 1.929574  | 3.830607  | -0.401395 |
| 70 | 1  | 0 | 1.771338  | 3.989007  | 0.669211  |
| 71 | 1  | 0 | 2.835069  | 4.347978  | -0.732898 |
| 72 | 1  | 0 | 1.066712  | 4.187589  | -0.964774 |
| 73 | 6  | 0 | 2.096905  | -0.109165 | -2.020531 |
| 74 | 6  | 0 | 2.641027  | -0.197725 | -0.569612 |
| 75 | 8  | 0 | 0.984368  | -0.471649 | -2.341003 |
| 76 | 8  | 0 | 1.543935  | -0.636362 | 0.186057  |
| 77 | 8  | 0 | 2.992861  | 0.400029  | -2.872043 |
| 78 | 6  | 0 | 2.571894  | 0.521080  | -4.247732 |
| 79 | 1  | 0 | 2.338541  | -0.464576 | -4.657780 |
| 80 | 1  | 0 | 1.692068  | 1.165438  | -4.313381 |

|    |   |   |          |           |           |
|----|---|---|----------|-----------|-----------|
| 81 | 1 | 0 | 3.420089 | 0.966945  | -4.766881 |
| 82 | 6 | 0 | 3.830793 | -1.179820 | -0.483527 |
| 83 | 6 | 0 | 5.013127 | -1.006503 | -1.222177 |
| 84 | 6 | 0 | 6.055347 | -1.930190 | -1.116129 |
| 85 | 6 | 0 | 5.936834 | -3.039505 | -0.274081 |
| 86 | 6 | 0 | 3.718365 | -2.295974 | 0.355216  |
| 87 | 6 | 0 | 4.762629 | -3.218709 | 0.459123  |
| 88 | 1 | 0 | 5.119740 | -0.154735 | -1.883278 |
| 89 | 1 | 0 | 6.961636 | -1.781561 | -1.698310 |
| 90 | 1 | 0 | 6.749169 | -3.757414 | -0.194845 |
| 91 | 1 | 0 | 4.652583 | -4.079357 | 1.114047  |
| 92 | 1 | 0 | 2.803127 | -2.446352 | 0.914616  |

-----  
***mr-IM3***

Standard orientation:

| Center<br>Number | Atomic<br>Number | Atomic<br>Type | Coordinates (Angstroms) |           |           |
|------------------|------------------|----------------|-------------------------|-----------|-----------|
|                  |                  |                | X                       | Y         | Z         |
| 1                | 6                | 0              | 0.831459                | -0.616877 | -2.375173 |
| 2                | 6                | 0              | 1.075255                | -2.142721 | -2.238268 |
| 3                | 8                | 0              | 0.086492                | -2.791289 | -1.914842 |
| 4                | 8                | 0              | 2.036646                | 0.911657  | 1.343650  |
| 5                | 15               | 0              | 2.486789                | -0.419977 | 0.657320  |
| 6                | 8                | 0              | 1.944679                | -1.672545 | 1.652650  |
| 7                | 6                | 0              | 2.347747                | -1.739849 | 3.026929  |
| 8                | 1                | 0              | 1.728746                | -2.506992 | 3.504790  |
| 9                | 1                | 0              | 3.402701                | -2.021682 | 3.104508  |
| 10               | 1                | 0              | 2.196574                | -0.778229 | 3.532574  |
| 11               | 8                | 0              | 4.130269                | -0.578869 | 1.072159  |
| 12               | 6                | 0              | 4.986911                | 0.534548  | 0.859525  |
| 13               | 1                | 0              | 5.988210                | 0.238592  | 1.188528  |
| 14               | 1                | 0              | 4.655936                | 1.407151  | 1.435387  |
| 15               | 1                | 0              | 5.037930                | 0.811801  | -0.206359 |
| 16               | 7                | 0              | 0.633957                | 3.074599  | 0.155151  |
| 17               | 6                | 0              | -0.638444               | 2.673093  | 0.471559  |
| 18               | 7                | 0              | -0.610397               | 1.540129  | 1.242018  |
| 19               | 16               | 0              | -2.084851               | 3.407273  | -0.023177 |
| 20               | 6                | 0              | 1.125285                | 4.149787  | -0.631198 |
| 21               | 6                | 0              | -1.689470               | 0.974976  | 2.043242  |
| 22               | 6                | 0              | -2.726382               | 0.222849  | 1.177765  |
| 23               | 6                | 0              | -3.737132               | -0.633618 | 1.976435  |
| 24               | 6                | 0              | -3.886870               | -2.017930 | 1.315473  |
| 25               | 7                | 0              | -2.017927               | -0.710352 | 0.202912  |
| 26               | 6                | 0              | -2.991569               | -1.149354 | -0.865167 |
| 27               | 6                | 0              | -4.207243               | -1.852813 | -0.202051 |
| 28               | 6                | 0              | -1.415211               | -1.929970 | 0.866803  |
| 29               | 6                | 0              | -2.557517               | -2.780714 | 1.465829  |
| 30               | 1                | 0              | 1.369011                | 2.444553  | 0.534424  |
| 31               | 6                | 0              | -2.315304               | 1.986232  | 3.048074  |
| 32               | 1                | 0              | -1.188250               | 0.212230  | 2.651820  |
| 33               | 1                | 0              | -4.703390               | -0.122568 | 2.016104  |
| 34               | 1                | 0              | -3.399344               | -0.757309 | 3.014144  |
| 35               | 1                | 0              | -2.431133               | -1.812277 | -1.525645 |
| 36               | 1                | 0              | -3.253812               | -0.254414 | -1.427801 |
| 37               | 6                | 0              | -5.592644               | -1.210363 | -0.418934 |
| 38               | 1                | 0              | -4.271100               | -2.868496 | -0.621869 |
| 39               | 1                | 0              | -0.858215               | -2.449343 | 0.087530  |
| 40               | 1                | 0              | -0.687743               | -1.586863 | 1.601813  |
| 41               | 1                | 0              | -2.360193               | -2.985005 | 2.524219  |
| 42               | 1                | 0              | -4.694570               | -2.575862 | 1.800524  |

|    |   |   |           |           |           |
|----|---|---|-----------|-----------|-----------|
| 43 | 1 | 0 | -2.615173 | -3.750398 | 0.957987  |
| 44 | 1 | 0 | 0.343750  | 1.174295  | 1.434012  |
| 45 | 1 | 0 | -1.254055 | -0.205027 | -0.278393 |
| 46 | 6 | 0 | 0.318092  | 5.100237  | -1.255359 |
| 47 | 6 | 0 | 0.896929  | 6.113777  | -2.001994 |
| 48 | 6 | 0 | 2.271490  | 6.201375  | -2.140095 |
| 49 | 6 | 0 | 3.077734  | 5.257869  | -1.517546 |
| 50 | 6 | 0 | 2.516435  | 4.241678  | -0.771030 |
| 51 | 1 | 0 | 3.144478  | 3.508614  | -0.282415 |
| 52 | 1 | 0 | 4.154685  | 5.315787  | -1.614618 |
| 53 | 1 | 0 | 2.713901  | 6.996684  | -2.724280 |
| 54 | 1 | 0 | 0.258934  | 6.845965  | -2.481503 |
| 55 | 1 | 0 | -0.752914 | 5.019106  | -1.137429 |
| 56 | 6 | 0 | -3.563863 | 2.489784  | 2.915491  |
| 57 | 6 | 0 | -4.078493 | 3.403413  | 3.887379  |
| 58 | 7 | 0 | -3.422924 | 3.817301  | 4.946945  |
| 59 | 6 | 0 | -2.120257 | 3.314828  | 5.089131  |
| 60 | 6 | 0 | -1.528007 | 2.418564  | 4.181655  |
| 61 | 6 | 0 | -1.383402 | 3.762470  | 6.230056  |
| 62 | 6 | 0 | -0.115638 | 3.337702  | 6.441996  |
| 63 | 6 | 0 | 0.492858  | 2.440194  | 5.521927  |
| 64 | 6 | 0 | -0.184564 | 1.996255  | 4.435150  |
| 65 | 1 | 0 | -4.200880 | 2.232092  | 2.083400  |
| 66 | 1 | 0 | -5.087336 | 3.787226  | 3.752781  |
| 67 | 1 | 0 | 0.308978  | 1.329036  | 3.743229  |
| 68 | 1 | 0 | 1.511310  | 2.114950  | 5.694121  |
| 69 | 1 | 0 | 0.445711  | 3.677239  | 7.303215  |
| 70 | 1 | 0 | -1.875164 | 4.449682  | 6.906562  |
| 71 | 1 | 0 | -3.226831 | 0.947717  | 0.535904  |
| 72 | 6 | 0 | -5.880387 | -0.073707 | -0.997952 |
| 73 | 1 | 0 | -6.393140 | -1.824870 | -0.022036 |
| 74 | 1 | 0 | -6.905269 | 0.259535  | -1.087802 |
| 75 | 1 | 0 | -5.141670 | 0.594271  | -1.417815 |
| 76 | 6 | 0 | 2.363865  | -2.793965 | -2.584647 |
| 77 | 6 | 0 | 3.598386  | -2.122513 | -2.623153 |
| 78 | 6 | 0 | 2.323910  | -4.174194 | -2.861798 |
| 79 | 6 | 0 | 4.763966  | -2.820006 | -2.937031 |
| 80 | 1 | 0 | 3.650369  | -1.069750 | -2.379137 |
| 81 | 6 | 0 | 3.488355  | -4.863934 | -3.187373 |
| 82 | 1 | 0 | 1.368668  | -4.687802 | -2.821377 |
| 83 | 6 | 0 | 4.712784  | -4.187138 | -3.224114 |
| 84 | 1 | 0 | 5.715963  | -2.296441 | -2.946605 |
| 85 | 1 | 0 | 3.444676  | -5.927041 | -3.408826 |
| 86 | 1 | 0 | 5.624747  | -4.725467 | -3.470036 |
| 87 | 6 | 0 | 1.422769  | 1.386620  | -3.479173 |
| 88 | 1 | 0 | 1.513491  | 1.946273  | -2.546341 |
| 89 | 1 | 0 | 2.190906  | 1.680770  | -4.193787 |
| 90 | 1 | 0 | 0.423569  | 1.528656  | -3.897061 |
| 91 | 8 | 0 | -0.122806 | -0.064798 | -1.857034 |
| 92 | 8 | 0 | 1.658620  | -0.020703 | -3.231602 |

-----  
**mr-TS2**

Standard orientation:

| Center<br>Number | Atomic<br>Number | Atomic<br>Type | Coordinates (Angstroms) |           |           |
|------------------|------------------|----------------|-------------------------|-----------|-----------|
|                  |                  |                | X                       | Y         | Z         |
| 1                | 6                | 0              | 1.012644                | -0.395512 | -1.933477 |
| 2                | 6                | 0              | 1.418975                | -1.622981 | -1.090729 |
| 3                | 8                | 0              | 0.508741                | -2.019298 | -0.325359 |
| 4                | 8                | 0              | 2.212932                | 1.162471  | 1.007011  |

|    |    |   |           |           |           |
|----|----|---|-----------|-----------|-----------|
| 5  | 15 | 0 | 2.836195  | -0.148584 | 0.475302  |
| 6  | 8  | 0 | 2.909605  | -1.252995 | 1.699163  |
| 7  | 6  | 0 | 3.558541  | -0.927027 | 2.938156  |
| 8  | 1  | 0 | 3.318823  | -1.733564 | 3.636747  |
| 9  | 1  | 0 | 4.642570  | -0.870608 | 2.796183  |
| 10 | 1  | 0 | 3.190375  | 0.026873  | 3.332511  |
| 11 | 8  | 0 | 4.484968  | 0.092397  | 0.307383  |
| 12 | 6  | 0 | 4.967469  | 1.235935  | -0.395002 |
| 13 | 1  | 0 | 6.057901  | 1.155397  | -0.412756 |
| 14 | 1  | 0 | 4.678352  | 2.160166  | 0.118079  |
| 15 | 1  | 0 | 4.595973  | 1.259335  | -1.428354 |
| 16 | 7  | 0 | 0.498445  | 3.173621  | 0.005993  |
| 17 | 6  | 0 | -0.720837 | 2.668994  | 0.377767  |
| 18 | 7  | 0 | -0.582161 | 1.507480  | 1.089636  |
| 19 | 16 | 0 | -2.229423 | 3.352608  | -0.001739 |
| 20 | 6  | 0 | 0.869999  | 4.327421  | -0.738113 |
| 21 | 6  | 0 | -1.598347 | 0.793227  | 1.866080  |
| 22 | 6  | 0 | -2.674982 | 0.149965  | 0.952496  |
| 23 | 6  | 0 | -3.952334 | -0.387700 | 1.636609  |
| 24 | 6  | 0 | -4.433315 | -1.659082 | 0.906165  |
| 25 | 7  | 0 | -2.079007 | -1.028393 | 0.175001  |
| 26 | 6  | 0 | -2.923563 | -1.259429 | -1.054720 |
| 27 | 6  | 0 | -4.409384 | -1.436317 | -0.637413 |
| 28 | 6  | 0 | -2.023315 | -2.296401 | 0.998178  |
| 29 | 6  | 0 | -3.459056 | -2.799714 | 1.246993  |
| 30 | 1  | 0 | 1.299857  | 2.594949  | 0.315647  |
| 31 | 6  | 0 | -2.131276 | 1.638182  | 3.060457  |
| 32 | 1  | 0 | -1.043128 | -0.042031 | 2.301794  |
| 33 | 1  | 0 | -4.723358 | 0.385875  | 1.608877  |
| 34 | 1  | 0 | -3.768882 | -0.618884 | 2.694622  |
| 35 | 1  | 0 | -2.520714 | -2.152619 | -1.536997 |
| 36 | 1  | 0 | -2.741610 | -0.415720 | -1.716900 |
| 37 | 6  | 0 | -5.401567 | -0.337642 | -1.070120 |
| 38 | 1  | 0 | -4.769587 | -2.371871 | -1.093682 |
| 39 | 1  | 0 | -1.394986 | -2.992908 | 0.445591  |
| 40 | 1  | 0 | -1.495527 | -2.054364 | 1.921853  |
| 41 | 1  | 0 | -3.571061 | -3.099959 | 2.294949  |
| 42 | 1  | 0 | -5.448594 | -1.915636 | 1.225409  |
| 43 | 1  | 0 | -3.672983 | -3.684152 | 0.634868  |
| 44 | 1  | 0 | 0.391272  | 1.202128  | 1.233049  |
| 45 | 1  | 0 | -1.107284 | -0.840111 | -0.157623 |
| 46 | 6  | 0 | -0.030601 | 5.234389  | -1.294620 |
| 47 | 6  | 0 | 0.440126  | 6.326849  | -2.005660 |
| 48 | 6  | 0 | 1.797594  | 6.535878  | -2.175313 |
| 49 | 6  | 0 | 2.697117  | 5.635102  | -1.620829 |
| 50 | 6  | 0 | 2.243596  | 4.542633  | -0.910030 |
| 51 | 1  | 0 | 2.943821  | 3.842692  | -0.475018 |
| 52 | 1  | 0 | 3.762276  | 5.786738  | -1.743185 |
| 53 | 1  | 0 | 2.155175  | 7.391574  | -2.731671 |
| 54 | 1  | 0 | -0.270568 | 7.023981  | -2.432154 |
| 55 | 1  | 0 | -1.086987 | 5.060039  | -1.151865 |
| 56 | 6  | 0 | -3.255559 | 2.387619  | 2.981805  |
| 57 | 6  | 0 | -3.694296 | 3.150299  | 4.108212  |
| 58 | 7  | 0 | -3.078966 | 3.193291  | 5.267589  |
| 59 | 6  | 0 | -1.896893 | 2.442832  | 5.355424  |
| 60 | 6  | 0 | -1.382408 | 1.670118  | 4.298150  |
| 61 | 6  | 0 | -1.200166 | 2.497994  | 6.603403  |
| 62 | 6  | 0 | -0.039484 | 1.823769  | 6.776962  |
| 63 | 6  | 0 | 0.496531  | 1.055897  | 5.707003  |
| 64 | 6  | 0 | -0.147429 | 0.980733  | 4.516993  |
| 65 | 1  | 0 | -3.833300 | 2.442455  | 2.071795  |
| 66 | 1  | 0 | -4.605805 | 3.736286  | 4.013511  |

|    |   |   |           |           |           |
|----|---|---|-----------|-----------|-----------|
| 67 | 1 | 0 | 0.296308  | 0.405103  | 3.718050  |
| 68 | 1 | 0 | 1.433639  | 0.532059  | 5.848936  |
| 69 | 1 | 0 | 0.492190  | 1.867042  | 7.718955  |
| 70 | 1 | 0 | -1.633288 | 3.099903  | 7.392123  |
| 71 | 1 | 0 | -2.941528 | 0.882338  | 0.191780  |
| 72 | 6 | 0 | -5.155849 | 0.767032  | -1.725380 |
| 73 | 1 | 0 | -6.419231 | -0.570516 | -0.777240 |
| 74 | 1 | 0 | -5.954480 | 1.452091  | -1.975849 |
| 75 | 1 | 0 | -4.171189 | 1.070697  | -2.052502 |
| 76 | 6 | 0 | 2.488029  | -2.592062 | -1.523461 |
| 77 | 6 | 0 | 3.217718  | -2.501345 | -2.720301 |
| 78 | 6 | 0 | 2.698930  | -3.703663 | -0.687797 |
| 79 | 6 | 0 | 4.131680  | -3.499911 | -3.068593 |
| 80 | 1 | 0 | 3.079962  | -1.655238 | -3.381158 |
| 81 | 6 | 0 | 3.618575  | -4.690949 | -1.032365 |
| 82 | 1 | 0 | 2.137637  | -3.767508 | 0.237724  |
| 83 | 6 | 0 | 4.339395  | -4.595155 | -2.228107 |
| 84 | 1 | 0 | 4.683862  | -3.415993 | -4.001606 |
| 85 | 1 | 0 | 3.776194  | -5.536495 | -0.367075 |
| 86 | 1 | 0 | 5.056233  | -5.366259 | -2.499844 |
| 87 | 6 | 0 | 1.549212  | 1.299449  | -3.489899 |
| 88 | 1 | 0 | 1.203100  | 2.090991  | -2.821675 |
| 89 | 1 | 0 | 2.443640  | 1.608116  | -4.031689 |
| 90 | 1 | 0 | 0.748975  | 1.031474  | -4.184618 |
| 91 | 8 | 0 | -0.125936 | 0.038984  | -1.872367 |
| 92 | 8 | 0 | 1.952573  | 0.142280  | -2.724158 |

-----  
**mr-IM4**

Standard orientation:

| Center<br>Number | Atomic<br>Number | Atomic<br>Type | Coordinates (Angstroms) |           |           |
|------------------|------------------|----------------|-------------------------|-----------|-----------|
|                  |                  |                | X                       | Y         | Z         |
| 1                | 6                | 0              | 1.232053                | -0.210566 | -1.823659 |
| 2                | 6                | 0              | 1.689909                | -0.973930 | -0.547260 |
| 3                | 8                | 0              | 0.666895                | -1.074377 | 0.334724  |
| 4                | 8                | 0              | 2.455007                | 1.399980  | 0.828063  |
| 5                | 15               | 0              | 2.975448                | 0.050715  | 0.395705  |
| 6                | 8                | 0              | 3.308779                | -0.959741 | 1.607054  |
| 7                | 6                | 0              | 4.226445                | -0.566597 | 2.640725  |
| 8                | 1                | 0              | 4.236957                | -1.386077 | 3.361900  |
| 9                | 1                | 0              | 5.230757                | -0.425977 | 2.227508  |
| 10               | 1                | 0              | 3.887355                | 0.353573  | 3.127912  |
| 11               | 8                | 0              | 4.428772                | 0.156887  | -0.333617 |
| 12               | 6                | 0              | 4.931563                | 1.387616  | -0.878294 |
| 13               | 1                | 0              | 5.995114                | 1.220639  | -1.063908 |
| 14               | 1                | 0              | 4.798919                | 2.207979  | -0.167862 |
| 15               | 1                | 0              | 4.422944                | 1.623017  | -1.817258 |
| 16               | 7                | 0              | 0.431719                | 3.291824  | 0.071483  |
| 17               | 6                | 0              | -0.754216               | 2.762902  | 0.519075  |
| 18               | 7                | 0              | -0.561726               | 1.588661  | 1.187614  |
| 19               | 16               | 0              | -2.290332               | 3.441557  | 0.268121  |
| 20               | 6                | 0              | 0.736025                | 4.457771  | -0.685296 |
| 21               | 6                | 0              | -1.549248               | 0.762462  | 1.893055  |
| 22               | 6                | 0              | -2.559540               | 0.118102  | 0.899298  |
| 23               | 6                | 0              | -3.910549               | -0.397832 | 1.446694  |
| 24               | 6                | 0              | -4.321786               | -1.671329 | 0.676022  |
| 25               | 7                | 0              | -1.891310               | -1.063694 | 0.199335  |
| 26               | 6                | 0              | -2.594187               | -1.297733 | -1.107082 |
| 27               | 6                | 0              | -4.120921               | -1.464933 | -0.856057 |
| 28               | 6                | 0              | -1.946486               | -2.320032 | 1.029025  |

|    |   |   |           |           |           |
|----|---|---|-----------|-----------|-----------|
| 29 | 6 | 0 | -3.402826 | -2.817647 | 1.132025  |
| 30 | 1 | 0 | 1.263677  | 2.739766  | 0.323835  |
| 31 | 6 | 0 | -2.116584 | 1.486476  | 3.147586  |
| 32 | 1 | 0 | -0.944895 | -0.067582 | 2.264163  |
| 33 | 1 | 0 | -4.665545 | 0.383241  | 1.326622  |
| 34 | 1 | 0 | -3.850605 | -0.623128 | 2.519880  |
| 35 | 1 | 0 | -2.150426 | -2.194829 | -1.544983 |
| 36 | 1 | 0 | -2.338113 | -0.464965 | -1.756809 |
| 37 | 6 | 0 | -5.052830 | -0.364769 | -1.406347 |
| 38 | 1 | 0 | -4.437411 | -2.402433 | -1.341531 |
| 39 | 1 | 0 | -1.275214 | -3.033544 | 0.548336  |
| 40 | 1 | 0 | -1.513861 | -2.082297 | 2.002357  |
| 41 | 1 | 0 | -3.629347 | -3.105062 | 2.165358  |
| 42 | 1 | 0 | -5.369316 | -1.914611 | 0.882718  |
| 43 | 1 | 0 | -3.559134 | -3.706713 | 0.508759  |
| 44 | 1 | 0 | 0.381676  | 1.198926  | 1.172390  |
| 45 | 1 | 0 | -0.809388 | -0.906700 | 0.042164  |
| 46 | 6 | 0 | -0.214028 | 5.355445  | -1.169288 |
| 47 | 6 | 0 | 0.191215  | 6.459585  | -1.902181 |
| 48 | 6 | 0 | 1.530817  | 6.689280  | -2.164026 |
| 49 | 6 | 0 | 2.479043  | 5.797382  | -1.681525 |
| 50 | 6 | 0 | 2.090930  | 4.693052  | -0.950409 |
| 51 | 1 | 0 | 2.828510  | 3.998797  | -0.571669 |
| 52 | 1 | 0 | 3.530777  | 5.965460  | -1.876767 |
| 53 | 1 | 0 | 1.836930  | 7.554251  | -2.736499 |
| 54 | 1 | 0 | -0.556916 | 7.149786  | -2.272281 |
| 55 | 1 | 0 | -1.255272 | 5.164340  | -0.953657 |
| 56 | 6 | 0 | -3.276785 | 2.182962  | 3.136792  |
| 57 | 6 | 0 | -3.742118 | 2.831756  | 4.322679  |
| 58 | 7 | 0 | -3.118980 | 2.815756  | 5.478486  |
| 59 | 6 | 0 | -1.902073 | 2.117750  | 5.500257  |
| 60 | 6 | 0 | -1.361810 | 1.455440  | 4.382959  |
| 61 | 6 | 0 | -1.198266 | 2.107805  | 6.745531  |
| 62 | 6 | 0 | -0.007294 | 1.475516  | 6.861446  |
| 63 | 6 | 0 | 0.552827  | 0.816973  | 5.732893  |
| 64 | 6 | 0 | -0.096043 | 0.806558  | 4.543265  |
| 65 | 1 | 0 | -3.864758 | 2.281154  | 2.237353  |
| 66 | 1 | 0 | -4.682159 | 3.377418  | 4.279031  |
| 67 | 1 | 0 | 0.362460  | 0.309735  | 3.700852  |
| 68 | 1 | 0 | 1.511302  | 0.322922  | 5.831182  |
| 69 | 1 | 0 | 0.528792  | 1.468854  | 7.801820  |
| 70 | 1 | 0 | -1.652145 | 2.625777  | 7.580826  |
| 71 | 1 | 0 | -2.750464 | 0.845776  | 0.111097  |
| 72 | 6 | 0 | -4.733587 | 0.695105  | -2.102715 |
| 73 | 1 | 0 | -6.094709 | -0.552977 | -1.171325 |
| 74 | 1 | 0 | -5.492313 | 1.386544  | -2.442795 |
| 75 | 1 | 0 | -3.720954 | 0.950073  | -2.380491 |
| 76 | 6 | 0 | 2.299317  | -2.332028 | -0.984045 |
| 77 | 6 | 0 | 3.214789  | -2.465985 | -2.038170 |
| 78 | 6 | 0 | 1.910747  | -3.474858 | -0.276531 |
| 79 | 6 | 0 | 3.716553  | -3.723348 | -2.385259 |
| 80 | 1 | 0 | 3.546131  | -1.590334 | -2.587602 |
| 81 | 6 | 0 | 2.414819  | -4.731494 | -0.620081 |
| 82 | 1 | 0 | 1.219487  | -3.349173 | 0.549768  |
| 83 | 6 | 0 | 3.317640  | -4.861819 | -1.679283 |
| 84 | 1 | 0 | 4.422489  | -3.811207 | -3.207915 |
| 85 | 1 | 0 | 2.105690  | -5.609687 | -0.057283 |
| 86 | 1 | 0 | 3.709884  | -5.839286 | -1.949672 |
| 87 | 6 | 0 | 1.822764  | 1.212436  | -3.623931 |
| 88 | 1 | 0 | 1.040580  | 1.937045  | -3.385527 |
| 89 | 1 | 0 | 2.727709  | 1.716990  | -3.964176 |
| 90 | 1 | 0 | 1.460282  | 0.515360  | -4.383585 |

|    |   |   |          |           |           |
|----|---|---|----------|-----------|-----------|
| 91 | 8 | 0 | 0.091795 | -0.245128 | -2.236482 |
| 92 | 8 | 0 | 2.210279 | 0.492142  | -2.432392 |

***mr-TS3***

Standard orientation:

| Center<br>Number | Atomic<br>Number | Atomic<br>Type | Coordinates (Angstroms) |           |           |
|------------------|------------------|----------------|-------------------------|-----------|-----------|
|                  |                  |                | X                       | Y         | Z         |
| 1                | 6                | 0              | 1.194595                | -0.120905 | -1.757371 |
| 2                | 6                | 0              | 1.695789                | -0.979021 | -0.566823 |
| 3                | 8                | 0              | 0.696694                | -1.174381 | 0.351047  |
| 4                | 8                | 0              | 2.480715                | 1.306280  | 0.937718  |
| 5                | 15               | 0              | 2.982798                | -0.023657 | 0.434668  |
| 6                | 8                | 0              | 3.308292                | -1.108093 | 1.577405  |
| 7                | 6                | 0              | 4.238798                | -0.795133 | 2.628869  |
| 8                | 1                | 0              | 4.254790                | -1.667561 | 3.284431  |
| 9                | 1                | 0              | 5.238299                | -0.624317 | 2.215959  |
| 10               | 1                | 0              | 3.905393                | 0.085144  | 3.187832  |
| 11               | 8                | 0              | 4.421599                | 0.096826  | -0.309973 |
| 12               | 6                | 0              | 4.934832                | 1.342126  | -0.814460 |
| 13               | 1                | 0              | 5.995312                | 1.169728  | -1.010672 |
| 14               | 1                | 0              | 4.813834                | 2.137490  | -0.074447 |
| 15               | 1                | 0              | 4.422684                | 1.613247  | -1.741124 |
| 16               | 7                | 0              | 0.530221                | 3.271513  | 0.056534  |
| 17               | 6                | 0              | -0.671684               | 2.734796  | 0.462459  |
| 18               | 7                | 0              | -0.489725               | 1.595693  | 1.188863  |
| 19               | 16               | 0              | -2.200617               | 3.368233  | 0.093007  |
| 20               | 6                | 0              | 0.857028                | 4.444177  | -0.679959 |
| 21               | 6                | 0              | -1.487465               | 0.777463  | 1.894384  |
| 22               | 6                | 0              | -2.457571               | 0.059613  | 0.906207  |
| 23               | 6                | 0              | -3.835887               | -0.388591 | 1.455294  |
| 24               | 6                | 0              | -4.230990               | -1.732471 | 0.809466  |
| 25               | 7                | 0              | -1.777154               | -1.166610 | 0.322640  |
| 26               | 6                | 0              | -2.467274               | -1.514545 | -0.959117 |
| 27               | 6                | 0              | -3.999263               | -1.679677 | -0.730046 |
| 28               | 6                | 0              | -1.859124               | -2.340570 | 1.253011  |
| 29               | 6                | 0              | -3.320593               | -2.824167 | 1.396016  |
| 30               | 1                | 0              | 1.353433                | 2.734981  | 0.357764  |
| 31               | 6                | 0              | -2.099084               | 1.552190  | 3.098667  |
| 32               | 1                | 0              | -0.879310               | -0.021760 | 2.320345  |
| 33               | 1                | 0              | -4.581011               | 0.379657  | 1.230983  |
| 34               | 1                | 0              | -3.815929               | -0.504170 | 2.547168  |
| 35               | 1                | 0              | -2.014775               | -2.443190 | -1.318967 |
| 36               | 1                | 0              | -2.213827               | -0.739946 | -1.677928 |
| 37               | 6                | 0              | -4.932481               | -0.651734 | -1.404225 |
| 38               | 1                | 0              | -4.297630               | -2.664237 | -1.126757 |
| 39               | 1                | 0              | -1.198450               | -3.109430 | 0.845642  |
| 40               | 1                | 0              | -1.432434               | -2.033520 | 2.210575  |
| 41               | 1                | 0              | -3.561483               | -2.998880 | 2.451654  |
| 42               | 1                | 0              | -5.282542               | -1.956622 | 1.019936  |
| 43               | 1                | 0              | -3.473882               | -3.774927 | 0.869987  |
| 44               | 1                | 0              | 0.471076                | 1.264065  | 1.275833  |
| 45               | 1                | 0              | -0.537854               | -1.045189 | 0.146120  |
| 46               | 6                | 0              | -0.081078               | 5.318382  | -1.226629 |
| 47               | 6                | 0              | 0.344084                | 6.432138  | -1.932924 |
| 48               | 6                | 0              | 1.692058                | 6.694204  | -2.108234 |
| 49               | 6                | 0              | 2.628058                | 5.825550  | -1.564072 |
| 50               | 6                | 0              | 2.219951                | 4.712398  | -0.857374 |
| 51               | 1                | 0              | 2.948975                | 4.037813  | -0.429997 |
| 52               | 1                | 0              | 3.685931                | 6.018914  | -1.690811 |

|    |   |   |           |           |           |
|----|---|---|-----------|-----------|-----------|
| 53 | 1 | 0 | 2.013631  | 7.566214  | -2.661187 |
| 54 | 1 | 0 | -0.394997 | 7.104013  | -2.351804 |
| 55 | 1 | 0 | -1.129073 | 5.101100  | -1.078173 |
| 56 | 6 | 0 | -3.242805 | 2.270357  | 3.004178  |
| 57 | 6 | 0 | -3.752362 | 2.974263  | 4.138716  |
| 58 | 7 | 0 | -3.188060 | 2.992161  | 5.324716  |
| 59 | 6 | 0 | -1.989986 | 2.271112  | 5.434339  |
| 60 | 6 | 0 | -1.408907 | 1.554824  | 4.371857  |
| 61 | 6 | 0 | -1.350267 | 2.295962  | 6.713870  |
| 62 | 6 | 0 | -0.181229 | 1.645109  | 6.915879  |
| 63 | 6 | 0 | 0.420500  | 0.931355  | 5.843732  |
| 64 | 6 | 0 | -0.167404 | 0.887689  | 4.623802  |
| 65 | 1 | 0 | -3.781814 | 2.342393  | 2.072048  |
| 66 | 1 | 0 | -4.677034 | 3.536338  | 4.026993  |
| 67 | 1 | 0 | 0.321699  | 0.347537  | 3.826746  |
| 68 | 1 | 0 | 1.361196  | 0.421795  | 6.010432  |
| 69 | 1 | 0 | 0.305950  | 1.664537  | 7.882271  |
| 70 | 1 | 0 | -1.834649 | 2.855399  | 7.504102  |
| 71 | 1 | 0 | -2.615163 | 0.730374  | 0.062306  |
| 72 | 6 | 0 | -4.610961 | 0.355811  | -2.173343 |
| 73 | 1 | 0 | -5.978798 | -0.843356 | -1.191224 |
| 74 | 1 | 0 | -5.371077 | 0.999011  | -2.594944 |
| 75 | 1 | 0 | -3.594184 | 0.611668  | -2.434344 |
| 76 | 6 | 0 | 2.295188  | -2.293662 | -1.123368 |
| 77 | 6 | 0 | 3.185371  | -2.330166 | -2.206731 |
| 78 | 6 | 0 | 1.932159  | -3.494771 | -0.503962 |
| 79 | 6 | 0 | 3.688586  | -3.549060 | -2.668458 |
| 80 | 1 | 0 | 3.494536  | -1.409228 | -2.690675 |
| 81 | 6 | 0 | 2.437306  | -4.713111 | -0.964160 |
| 82 | 1 | 0 | 1.258955  | -3.450681 | 0.344697  |
| 83 | 6 | 0 | 3.315555  | -4.745914 | -2.050662 |
| 84 | 1 | 0 | 4.374332  | -3.561133 | -3.512319 |
| 85 | 1 | 0 | 2.146744  | -5.637653 | -0.470417 |
| 86 | 1 | 0 | 3.708120  | -5.693634 | -2.411072 |
| 87 | 6 | 0 | 1.736620  | 1.442189  | -3.450657 |
| 88 | 1 | 0 | 0.950771  | 2.134373  | -3.140617 |
| 89 | 1 | 0 | 2.629361  | 1.983251  | -3.765807 |
| 90 | 1 | 0 | 1.368913  | 0.800353  | -4.254942 |
| 91 | 8 | 0 | 0.048665  | -0.140466 | -2.148256 |
| 92 | 8 | 0 | 2.155593  | 0.635413  | -2.324993 |

**mr-IM5**

Standard orientation:

| Center<br>Number | Atomic<br>Number | Atomic<br>Type | Coordinates (Angstroms) |           |           |
|------------------|------------------|----------------|-------------------------|-----------|-----------|
|                  |                  |                | X                       | Y         | Z         |
| 1                | 6                | 0              | 1.253890                | -0.212413 | -1.836003 |
| 2                | 6                | 0              | 1.827103                | -1.185480 | -0.782597 |
| 3                | 8                | 0              | 0.797078                | -1.670634 | 0.032269  |
| 4                | 8                | 0              | 2.345983                | 0.926994  | 1.056892  |
| 5                | 15               | 0              | 2.963804                | -0.293745 | 0.431765  |
| 6                | 8                | 0              | 3.283531                | -1.506502 | 1.429831  |
| 7                | 6                | 0              | 4.111503                | -1.304570 | 2.592070  |
| 8                | 1                | 0              | 4.117609                | -2.258005 | 3.122116  |
| 9                | 1                | 0              | 5.130084                | -1.040407 | 2.290793  |
| 10               | 1                | 0              | 3.688896                | -0.523761 | 3.231698  |
| 11               | 8                | 0              | 4.414244                | -0.003657 | -0.223167 |
| 12               | 6                | 0              | 4.875872                | 1.321292  | -0.550652 |
| 13               | 1                | 0              | 5.931150                | 1.210159  | -0.806921 |
| 14               | 1                | 0              | 4.765994                | 1.988436  | 0.307872  |



|    |    |   |           |           |           |
|----|----|---|-----------|-----------|-----------|
| 15 | 1  | 0 | 4.321228  | 1.714400  | -1.405949 |
| 16 | 7  | 0 | 0.586141  | 3.101268  | 0.116045  |
| 17 | 6  | 0 | -0.661466 | 2.634380  | 0.485464  |
| 18 | 7  | 0 | -0.568419 | 1.510782  | 1.253390  |
| 19 | 16 | 0 | -2.131287 | 3.336033  | 0.031956  |
| 20 | 6  | 0 | 0.998172  | 4.265890  | -0.590708 |
| 21 | 6  | 0 | -1.637091 | 0.802153  | 1.983633  |
| 22 | 6  | 0 | -2.601590 | 0.043193  | 1.029183  |
| 23 | 6  | 0 | -3.935469 | -0.447733 | 1.660932  |
| 24 | 6  | 0 | -4.297489 | -1.817530 | 1.049792  |
| 25 | 7  | 0 | -1.895288 | -1.127545 | 0.413987  |
| 26 | 6  | 0 | -2.643858 | -1.503996 | -0.810649 |
| 27 | 6  | 0 | -4.155014 | -1.770377 | -0.502071 |
| 28 | 6  | 0 | -1.873141 | -2.297474 | 1.332785  |
| 29 | 6  | 0 | -3.300024 | -2.852590 | 1.593592  |
| 30 | 1  | 0 | 1.366884  | 2.540324  | 0.471412  |
| 31 | 6  | 0 | -2.260821 | 1.722143  | 3.074633  |
| 32 | 1  | 0 | -1.092087 | 0.019131  | 2.516796  |
| 33 | 1  | 0 | -4.733103 | 0.276635  | 1.470508  |
| 34 | 1  | 0 | -3.852840 | -0.550356 | 2.752683  |
| 35 | 1  | 0 | -2.170893 | -2.403950 | -1.217953 |
| 36 | 1  | 0 | -2.495750 | -0.712861 | -1.545607 |
| 37 | 6  | 0 | -5.196003 | -0.818699 | -1.130088 |
| 38 | 1  | 0 | -4.412442 | -2.778006 | -0.870816 |
| 39 | 1  | 0 | -1.221183 | -3.053282 | 0.884464  |
| 40 | 1  | 0 | -1.391090 | -1.991635 | 2.266403  |
| 41 | 1  | 0 | -3.464791 | -3.013996 | 2.667031  |
| 42 | 1  | 0 | -5.323381 | -2.092148 | 1.321407  |
| 43 | 1  | 0 | -3.444604 | -3.821388 | 1.097239  |
| 44 | 1  | 0 | 0.374207  | 1.161435  | 1.417654  |
| 45 | 1  | 0 | -0.079203 | -1.188127 | -0.056324 |
| 46 | 6  | 0 | 0.129757  | 5.124366  | -1.263872 |
| 47 | 6  | 0 | 0.632861  | 6.225366  | -1.937724 |
| 48 | 6  | 0 | 1.991969  | 6.489302  | -1.959796 |
| 49 | 6  | 0 | 2.858477  | 5.636584  | -1.290704 |
| 50 | 6  | 0 | 2.371326  | 4.537320  | -0.612363 |
| 51 | 1  | 0 | 3.046745  | 3.878159  | -0.085581 |
| 52 | 1  | 0 | 3.923560  | 5.831942  | -1.295207 |
| 53 | 1  | 0 | 2.374734  | 7.350885  | -2.489628 |
| 54 | 1  | 0 | -0.053244 | 6.885303  | -2.454395 |
| 55 | 1  | 0 | -0.928711 | 4.909705  | -1.229007 |
| 56 | 6  | 0 | -3.418591 | 2.399278  | 2.890940  |
| 57 | 6  | 0 | -3.939207 | 3.238917  | 3.923909  |
| 58 | 7  | 0 | -3.372814 | 3.428239  | 5.093989  |
| 59 | 6  | 0 | -2.161952 | 2.749254  | 5.294035  |
| 60 | 6  | 0 | -1.571475 | 1.907396  | 4.334384  |
| 61 | 6  | 0 | -1.519032 | 2.954894  | 6.555665  |
| 62 | 6  | 0 | -0.339382 | 2.354767  | 6.837521  |
| 63 | 6  | 0 | 0.270403  | 1.512085  | 5.868438  |
| 64 | 6  | 0 | -0.320149 | 1.297490  | 4.668139  |
| 65 | 1  | 0 | -3.966459 | 2.333607  | 1.963687  |
| 66 | 1  | 0 | -4.874907 | 3.763295  | 3.742162  |
| 67 | 1  | 0 | 0.171117  | 0.660658  | 3.947688  |
| 68 | 1  | 0 | 1.218288  | 1.042340  | 6.098830  |
| 69 | 1  | 0 | 0.149686  | 2.510626  | 7.790443  |
| 70 | 1  | 0 | -2.009941 | 3.607188  | 7.266737  |
| 71 | 1  | 0 | -2.830850 | 0.717171  | 0.203611  |
| 72 | 6  | 0 | -4.991509 | 0.217418  | -1.901507 |
| 73 | 1  | 0 | -6.214848 | -1.093608 | -0.876594 |
| 74 | 1  | 0 | -5.817864 | 0.799220  | -2.285590 |
| 75 | 1  | 0 | -4.010557 | 0.556635  | -2.200179 |
| 76 | 6  | 0 | 2.545031  | -2.349482 | -1.493376 |

|    |   |   |          |           |           |
|----|---|---|----------|-----------|-----------|
| 77 | 6 | 0 | 3.557479 | -2.134009 | -2.440300 |
| 78 | 6 | 0 | 2.169307 | -3.662781 | -1.184958 |
| 79 | 6 | 0 | 4.177330 | -3.215506 | -3.069560 |
| 80 | 1 | 0 | 3.867248 | -1.125074 | -2.688461 |
| 81 | 6 | 0 | 2.793195 | -4.742116 | -1.815201 |
| 82 | 1 | 0 | 1.389862 | -3.827644 | -0.451027 |
| 83 | 6 | 0 | 3.798316 | -4.524332 | -2.760168 |
| 84 | 1 | 0 | 4.957891 | -3.031593 | -3.803655 |
| 85 | 1 | 0 | 2.489749 | -5.755721 | -1.565010 |
| 86 | 1 | 0 | 4.281355 | -5.365116 | -3.251602 |
| 87 | 6 | 0 | 1.700216 | 1.543006  | -3.352551 |
| 88 | 1 | 0 | 0.895722 | 2.163332  | -2.952898 |
| 89 | 1 | 0 | 2.565771 | 2.149379  | -3.620054 |
| 90 | 1 | 0 | 1.342053 | 0.975244  | -4.214344 |
| 91 | 8 | 0 | 0.097016 | -0.238893 | -2.183842 |
| 92 | 8 | 0 | 2.174612 | 0.633904  | -2.327659 |

**Table S1** The calculated HOMO and LUMO energy, Electronic chemical potential  $\mu$ , Chemical hardness  $\eta$ , global electrophilicity  $\omega$ , and global nucleophilicity  $N$  for reactants, molecular complexes and intermediates at B3LYP/6-311++G(d,p)

|                        | HOMO<br>[a.u.] | LUMO<br>[a.u.] | $\mu^a$<br>[a.u.] | $\eta^b$<br>[a.u.] | $\omega^c$<br>[eV] | $N^d$<br>[eV] |
|------------------------|----------------|----------------|-------------------|--------------------|--------------------|---------------|
| TCE                    | -0.34767       | -0.19513       | -0.27140          | 0.15254            | 6.6                | -             |
| DMHP                   | -0.30294       | -0.01224       | -0.15759          | 0.29070            | 1.2                | 1.2           |
| phosphite              | -0.25951       | -0.01725       | -0.13838          | 0.24226            | 1.1                | 2.4           |
| $\alpha$ -ketoester    | -0.26728       | -0.09149       | -0.17939          | 0.17579            | 2.5                | 2.2           |
| <i>s</i> - <b>IM1</b>  | -0.19507       | -0.05498       | -0.12503          | 0.14009            | 1.5                | 4.2           |
| <i>s</i> - <b>IM2a</b> | -0.20525       | -0.06625       | -0.13575          | 0.13900            | 1.8                | 3.9           |
| <i>s</i> - <b>IM2b</b> | -0.20879       | -0.06884       | -0.13882          | 0.13995            | 1.9                | 3.8           |
| <i>ds</i> - <b>IM3</b> | -0.20355       | -0.10014       | -0.15185          | 0.10341            | 3.0                | 3.9           |
| <i>ms</i> - <b>IM3</b> | -0.19908       | -0.09718       | -0.14813          | 0.10190            | 2.9                | 4.0           |
| <i>dr</i> - <b>IM3</b> | -0.20086       | -0.10752       | -0.15419          | 0.09334            | 3.5                | 4.0           |
| <i>mr</i> - <b>IM3</b> | -0.19662       | -0.10316       | -0.14989          | 0.09346            | 3.3                | 4.1           |

*a*:  $\mu = (\epsilon_{\text{HOMO}} + \epsilon_{\text{LUMO}}) / 2$ ; *b*:  $\eta = \epsilon_{\text{HOMO}} - \epsilon_{\text{LUMO}}$ ; *c*:  $\omega$  [eV] =  $(\mu^2/2\eta)$ ; *d*:  $N = \epsilon_{\text{HOMO}}(N_{\text{U}}) - \epsilon_{\text{LUMO}}(\text{TCE})$

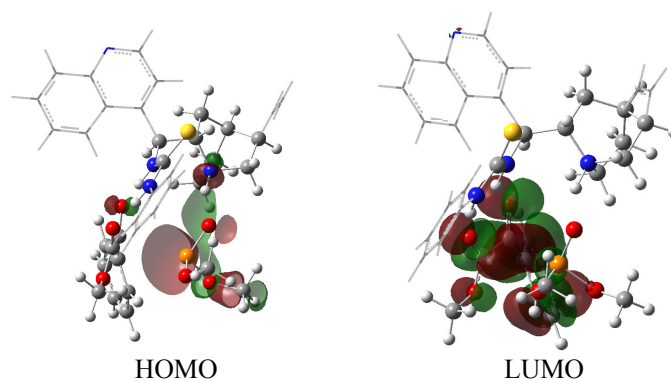

**Fig. S1** The visualization of HOMO and LUMO for the pre-transition complex *ds*-**IM3**

*S3 Energies of C-P bond formation TSs over (R)-CAT, (S)-Py-CAT, (S)-Ac-CAT.*

| Species                | $E_{ZPE}$<br>(Hartree) | $G_c^a$<br>(Hartree) | $SCF_{PCM}^b$<br>(Hartree) | $D_c^c$<br>(Hartree) | $SCF_{PCM}+G_c+D_c$<br>(Hartree) | $\Delta G$<br>(kcal/mol) |
|------------------------|------------------------|----------------------|----------------------------|----------------------|----------------------------------|--------------------------|
| (R)-CAT                | -1611.08843            | 0.47694              | -1625.13511                | -0.14785             | -1624.80603                      | -                        |
| (R)- <i>dr</i> -TS2    | -2831.81254            | 0.71003              | -2846.37413                | -0.24079             | -2845.90489                      | 0.1                      |
| (R)- <i>mr</i> -TS2    | -2831.81240            | 0.70889              | -2846.37099                | -0.24339             | -2845.90549                      | -0.3                     |
| (R)- <i>ds</i> -TS2    | -2831.79473            | 0.70860              | -2846.35593                | -0.24210             | -2845.88943                      | 9.8                      |
| (R)- <i>ms</i> -TS2    | -2831.80489            | 0.70953              | -2846.36526                | -0.23953             | -2845.89526                      | 6.1                      |
| (S)-Py-CAT             | -1460.34701            | 0.42608              | -1471.46140                | -0.12854             | -1471.16387                      | -                        |
| (S)-Py- <i>ds</i> -TS2 | -2681.07237            | 0.65742              | -2692.69823                | -0.22041             | -2692.26121                      | 1.0                      |
| (S)-Py- <i>ms</i> -TS2 | -2681.07216            | 0.65753              | -2692.69635                | -0.22258             | -2692.26141                      | 0.9                      |
| (S)-Py- <i>dr</i> -TS2 | -2681.06681            | 0.65566              | -2692.69351                | -0.21929             | -2692.25715                      | 3.6                      |
| (S)-Py- <i>mr</i> -TS2 | -2681.06736            | 0.65620              | -2692.69026                | -0.21826             | -2692.25231                      | 6.6                      |
| (S)-Ac-CAT             | -1761.80295            | 0.52740              | -1778.79242                | -0.17118             | -1778.43620                      | -                        |
| (S)-Ac- <i>ds</i> -TS2 | -2982.52815            | 0.76064              | -3000.02885                | -0.26526             | -2999.53347                      | 1.1                      |
| (S)-Ac- <i>ms</i> -TS2 | -2982.52384            | 0.76063              | -3000.02392                | -0.26448             | -2999.52777                      | 4.7                      |
| (S)-Ac- <i>dr</i> -TS2 | -2982.51325            | 0.76254              | -3000.01893                | -0.26883             | -2999.52521                      | 6.3                      |
| (S)-Ac- <i>mr</i> -TS2 | -2982.52246            | 0.76016              | -3000.02239                | -0.26472             | -2999.52695                      | 5.2                      |

a: Thermal correction to Gibbs Free Energy.

b: Total electronic energies in solvent.

c: Dispersion effect correction energy.

*S4: Cartesian coordinates of C-P bond formation TSs over (R)-CAT, (S)-Py-CAT, (S)-Ac-CAT.*

(R)-CAT

Standard orientation:

| Center Number | Atomic Number | Atomic Type | Coordinates (Angstroms) |           |           |
|---------------|---------------|-------------|-------------------------|-----------|-----------|
|               |               |             | X                       | Y         | Z         |
| 1             | 7             | 0           | 2.750490                | -0.559635 | -0.751499 |
| 2             | 6             | 0           | 1.694512                | -0.236996 | 0.081466  |
| 3             | 7             | 0           | 0.527834                | -0.146957 | -0.646136 |
| 4             | 16            | 0           | 1.815705                | 0.052719  | 1.727350  |
| 5             | 6             | 0           | 4.093541                | -0.962669 | -0.497752 |
| 6             | 6             | 0           | -0.822045               | 0.161333  | -0.134496 |
| 7             | 6             | 0           | -1.434953               | -1.045364 | 0.619542  |
| 8             | 6             | 0           | -2.921439               | -0.856205 | 1.042199  |
| 9             | 6             | 0           | -3.654364               | -2.200868 | 0.836852  |
| 10            | 7             | 0           | -1.305841               | -2.273837 | -0.214295 |
| 11            | 6             | 0           | -2.336484               | -2.329878 | -1.271928 |
| 12            | 6             | 0           | -3.778971               | -2.481843 | -0.685602 |
| 13            | 6             | 0           | -1.477840               | -3.439504 | 0.674998  |
| 14            | 6             | 0           | -2.817538               | -3.334257 | 1.468965  |
| 15            | 1             | 0           | -1.414280               | 0.281481  | -1.051158 |
| 16            | 6             | 0           | -0.876472               | 1.541421  | 0.573103  |
| 17            | 1             | 0           | -0.815680               | -1.224299 | 1.501988  |
| 18            | 1             | 0           | -3.410791               | -0.072879 | 0.444481  |
| 19            | 1             | 0           | -2.993572               | -0.545245 | 2.090161  |
| 20            | 1             | 0           | -2.089214               | -3.166763 | -1.935035 |
| 21            | 1             | 0           | -2.258724               | -1.419942 | -1.873525 |
| 22            | 6             | 0           | -4.875824               | -1.629633 | -1.359132 |
| 23            | 1             | 0           | -4.097285               | -3.534129 | -0.794020 |
| 24            | 1             | 0           | -1.456392               | -4.339609 | 0.048906  |
| 25            | 1             | 0           | -0.615042               | -3.491434 | 1.347611  |
| 26            | 1             | 0           | -2.630171               | -3.113216 | 2.527964  |
| 27            | 1             | 0           | -4.648611               | -2.161414 | 1.295975  |
| 28            | 1             | 0           | -3.370988               | -4.281472 | 1.433902  |
| 29            | 1             | 0           | 2.543769                | -0.446662 | -1.741568 |
| 30            | 1             | 0           | 0.478440                | -0.819105 | -1.405065 |
| 31            | 6             | 0           | -0.698646               | 2.743578  | -0.211161 |
| 32            | 6             | 0           | -0.795764               | 3.983272  | 0.444085  |
| 33            | 6             | 0           | -1.111503               | 1.687450  | 1.897902  |
| 34            | 6             | 0           | -1.189446               | 2.991288  | 2.478355  |
| 35            | 7             | 0           | -1.049589               | 4.117885  | 1.816957  |
| 36            | 6             | 0           | -0.427566               | 2.748574  | -1.615955 |
| 37            | 6             | 0           | -0.632393               | 5.194957  | -0.299419 |
| 38            | 6             | 0           | -4.845610               | -1.120104 | -2.563708 |
| 39            | 1             | 0           | -5.762914               | -1.497284 | -0.748187 |
| 40            | 1             | 0           | -4.001516               | -1.227671 | -3.229290 |
| 41            | 1             | 0           | -5.681738               | -0.561540 | -2.960469 |
| 42            | 6             | 0           | 4.923065                | -1.137968 | -1.610571 |
| 43            | 6             | 0           | 4.602987                | -1.209614 | 0.775605  |
| 44            | 6             | 0           | 6.231650                | -1.548005 | -1.448756 |
| 45            | 6             | 0           | 6.738427                | -1.793118 | -0.180384 |
| 46            | 6             | 0           | 5.917705                | -1.621771 | 0.921804  |
| 47            | 1             | 0           | 6.861252                | -1.677906 | -2.320194 |
| 48            | 1             | 0           | 4.529779                | -0.950080 | -2.600463 |
| 49            | 1             | 0           | 7.763825                | -2.113308 | -0.055119 |
| 50            | 1             | 0           | 6.303089                | -1.809307 | 1.916525  |
| 51            | 1             | 0           | 3.961063                | -1.060760 | 1.630982  |

|    |   |   |           |          |           |
|----|---|---|-----------|----------|-----------|
| 52 | 1 | 0 | -1.231551 | 0.836153 | 2.550189  |
| 53 | 1 | 0 | -1.381106 | 3.071192 | 3.546243  |
| 54 | 6 | 0 | -0.274882 | 3.909995 | -2.296515 |
| 55 | 6 | 0 | -0.380753 | 5.161296 | -1.628778 |
| 56 | 1 | 0 | -0.331821 | 1.807160 | -2.136127 |
| 57 | 1 | 0 | -0.067962 | 3.895034 | -3.359181 |
| 58 | 1 | 0 | -0.255862 | 6.076644 | -2.192941 |
| 59 | 1 | 0 | -0.716258 | 6.129595 | 0.240446  |

(R)-*dr*-TS2

Standard orientation:

| Center<br>Number | Atomic<br>Number | Atomic<br>Type | Coordinates (Angstroms) |           |           |
|------------------|------------------|----------------|-------------------------|-----------|-----------|
|                  |                  |                | X                       | Y         | Z         |
| 1                | 7                | 0              | 0.230475                | 3.374282  | 0.533247  |
| 2                | 6                | 0              | -1.033533               | 2.930448  | 0.248499  |
| 3                | 7                | 0              | -1.023298               | 1.935339  | -0.684854 |
| 4                | 16               | 0              | -2.465943               | 3.501326  | 0.963496  |
| 5                | 6                | 0              | 0.724949                | 4.364134  | 1.433555  |
| 6                | 6                | 0              | -2.155476               | 1.345066  | -1.399660 |
| 7                | 6                | 0              | -3.022715               | 0.457308  | -0.482405 |
| 8                | 6                | 0              | -4.225030               | -0.236766 | -1.162839 |
| 9                | 6                | 0              | -4.413058               | -1.642494 | -0.554675 |
| 10               | 7                | 0              | -2.173304               | -0.655057 | 0.130580  |
| 11               | 6                | 0              | -1.941726               | -1.802829 | -0.825479 |
| 12               | 6                | 0              | -3.269023               | -2.565976 | -1.058652 |
| 13               | 6                | 0              | -2.872402               | -1.156406 | 1.365832  |
| 14               | 6                | 0              | -4.320418               | -1.543318 | 0.982915  |
| 15               | 1                | 0              | -1.671232               | 0.666663  | -2.105867 |
| 16               | 6                | 0              | -2.931658               | 2.387332  | -2.252536 |
| 17               | 1                | 0              | -3.348451               | 1.058657  | 0.367266  |
| 18               | 1                | 0              | -4.067947               | -0.317964 | -2.246977 |
| 19               | 1                | 0              | -5.125402               | 0.366332  | -1.015660 |
| 20               | 1                | 0              | -1.159308               | -2.417302 | -0.378531 |
| 21               | 1                | 0              | -1.527867               | -1.367938 | -1.733640 |
| 22               | 6                | 0              | -3.492231               | -3.054216 | -2.503962 |
| 23               | 1                | 0              | -3.275186               | -3.465731 | -0.419799 |
| 24               | 1                | 0              | -2.284380               | -2.000318 | 1.732907  |
| 25               | 1                | 0              | -2.822096               | -0.358443 | 2.109736  |
| 26               | 1                | 0              | -5.030266               | -0.795531 | 1.354945  |
| 27               | 1                | 0              | -5.384999               | -2.053033 | -0.846105 |
| 28               | 1                | 0              | -4.586570               | -2.499121 | 1.447848  |
| 29               | 1                | 0              | 0.974093                | 2.910622  | 0.001420  |
| 30               | 1                | 0              | -0.125100               | 1.564841  | -1.019356 |
| 31               | 1                | 0              | -1.208078               | -0.342426 | 0.421087  |
| 32               | 6                | 0              | -2.351658               | 2.839257  | -3.497947 |
| 33               | 6                | 0              | -3.072868               | 3.779209  | -4.255162 |
| 34               | 6                | 0              | -4.119194               | 2.916106  | -1.877785 |
| 35               | 6                | 0              | -4.776330               | 3.872615  | -2.713157 |
| 36               | 7                | 0              | -4.312686               | 4.306391  | -3.862797 |
| 37               | 6                | 0              | -1.088316               | 2.395810  | -4.004543 |
| 38               | 6                | 0              | -2.542722               | 4.249465  | -5.497697 |
| 39               | 6                | 0              | -2.588569               | -3.170198 | -3.442404 |
| 40               | 1                | 0              | -4.514714               | -3.357422 | -2.699833 |
| 41               | 1                | 0              | -1.549819               | -2.903381 | -3.306107 |
| 42               | 1                | 0              | -2.845341               | -3.554991 | -4.419933 |
| 43               | 6                | 0              | 2.108959                | 4.574452  | 1.431116  |
| 44               | 6                | 0              | -0.076208               | 5.114713  | 2.290788  |
| 45               | 6                | 0              | 2.672108                | 5.514395  | 2.270536  |
| 46               | 6                | 0              | 1.873075                | 6.261620  | 3.125432  |

|    |    |   |           |           |           |
|----|----|---|-----------|-----------|-----------|
| 47 | 6  | 0 | 0.504562  | 6.054866  | 3.127468  |
| 48 | 1  | 0 | 3.744083  | 5.666617  | 2.258272  |
| 49 | 1  | 0 | 2.729331  | 3.991661  | 0.763631  |
| 50 | 1  | 0 | 2.316729  | 6.997818  | 3.781935  |
| 51 | 1  | 0 | -0.127891 | 6.633112  | 3.789716  |
| 52 | 1  | 0 | -1.142899 | 4.944009  | 2.277884  |
| 53 | 1  | 0 | -4.592947 | 2.646795  | -0.946000 |
| 54 | 1  | 0 | -5.732059 | 4.275836  | -2.385564 |
| 55 | 6  | 0 | -0.608257 | 2.861455  | -5.183216 |
| 56 | 6  | 0 | -1.347255 | 3.804099  | -5.949909 |
| 57 | 1  | 0 | -0.500772 | 1.687728  | -3.436381 |
| 58 | 1  | 0 | 0.350553  | 2.518363  | -5.551334 |
| 59 | 1  | 0 | -0.942259 | 4.159645  | -6.888792 |
| 60 | 1  | 0 | -3.129605 | 4.970269  | -6.052641 |
| 61 | 8  | 0 | 0.313808  | -0.718202 | 1.086276  |
| 62 | 15 | 0 | 1.723627  | -1.037294 | 0.572474  |
| 63 | 8  | 0 | 2.818510  | -0.573275 | 1.747070  |
| 64 | 6  | 0 | 2.522359  | 0.502568  | 2.649513  |
| 65 | 1  | 0 | 1.505467  | 0.414963  | 3.042072  |
| 66 | 1  | 0 | 2.634161  | 1.470357  | 2.148482  |
| 67 | 1  | 0 | 3.246763  | 0.428466  | 3.465544  |
| 68 | 8  | 0 | 2.002848  | -2.664819 | 0.598749  |
| 69 | 6  | 0 | 1.860593  | -3.417140 | 1.813498  |
| 70 | 1  | 0 | 2.612240  | -3.106454 | 2.546487  |
| 71 | 1  | 0 | 0.858343  | -3.286903 | 2.238545  |
| 72 | 1  | 0 | 2.014123  | -4.466251 | 1.547735  |
| 73 | 6  | 0 | 2.849967  | 0.882032  | -1.278275 |
| 74 | 6  | 0 | 1.869946  | -0.210725 | -1.742118 |
| 75 | 8  | 0 | 2.475011  | 1.938425  | -0.788745 |
| 76 | 8  | 0 | 4.139548  | 0.598757  | -1.490091 |
| 77 | 6  | 0 | 5.097399  | 1.577160  | -1.038618 |
| 78 | 1  | 0 | 4.915870  | 2.537972  | -1.526598 |
| 79 | 1  | 0 | 5.028971  | 1.694758  | 0.046053  |
| 80 | 1  | 0 | 6.070201  | 1.175462  | -1.322773 |
| 81 | 6  | 0 | 2.402336  | -1.399000 | -2.517037 |
| 82 | 8  | 0 | 0.698222  | 0.192664  | -1.979178 |
| 83 | 6  | 0 | 3.525333  | -2.156940 | -2.151413 |
| 84 | 6  | 0 | 3.956097  | -3.215617 | -2.950173 |
| 85 | 6  | 0 | 1.719669  | -1.734475 | -3.697022 |
| 86 | 6  | 0 | 2.152059  | -2.793226 | -4.498978 |
| 87 | 6  | 0 | 3.273581  | -3.538504 | -4.128240 |
| 88 | 1  | 0 | 4.050648  | -1.935874 | -1.229648 |
| 89 | 1  | 0 | 4.823362  | -3.796980 | -2.646495 |
| 90 | 1  | 0 | 3.613089  | -4.364900 | -4.748177 |
| 91 | 1  | 0 | 1.615415  | -3.031029 | -5.414611 |
| 92 | 1  | 0 | 0.854883  | -1.143936 | -3.982125 |

-----  
**(R)-mr-TS2**

Standard orientation:

| Center Number | Atomic Number | Atomic Type | Coordinates (Angstroms) |           |           |
|---------------|---------------|-------------|-------------------------|-----------|-----------|
|               |               |             | X                       | Y         | Z         |
| 1             | 1             | 0           | 1.056174                | -0.446699 | -0.339122 |
| 2             | 7             | 0           | 0.353307                | 3.348750  | -0.627953 |
| 3             | 6             | 0           | 1.543087                | 2.703021  | -0.420108 |
| 4             | 7             | 0           | 1.455570                | 1.837805  | 0.636459  |
| 5             | 16            | 0           | 2.960254                | 2.894053  | -1.331779 |
| 6             | 6             | 0           | -0.054614               | 4.321381  | -1.582824 |
| 7             | 6             | 0           | 2.530463                | 1.100293  | 1.287621  |
| 8             | 6             | 0           | 3.039465                | -0.087885 | 0.435271  |

|    |   |   |           |           |           |
|----|---|---|-----------|-----------|-----------|
| 9  | 6 | 0 | 4.072870  | -0.995569 | 1.148172  |
| 10 | 6 | 0 | 3.786376  | -2.473363 | 0.813511  |
| 11 | 7 | 0 | 1.879247  | -0.988346 | 0.025632  |
| 12 | 6 | 0 | 1.392213  | -1.850379 | 1.168907  |
| 13 | 6 | 0 | 2.469492  | -2.910887 | 1.512898  |
| 14 | 6 | 0 | 2.314982  | -1.867281 | -1.121954 |
| 15 | 6 | 0 | 3.603298  | -2.613477 | -0.710962 |
| 16 | 1 | 0 | -0.403748 | 3.028022  | -0.008030 |
| 17 | 1 | 0 | 2.045210  | 0.655585  | 2.164109  |
| 18 | 6 | 0 | 3.651876  | 2.023176  | 1.849158  |
| 19 | 1 | 0 | 3.428927  | 0.308205  | -0.503494 |
| 20 | 1 | 0 | 4.030884  | -0.846841 | 2.235814  |
| 21 | 1 | 0 | 5.083304  | -0.723538 | 0.829866  |
| 22 | 1 | 0 | 0.445089  | -2.279611 | 0.845515  |
| 23 | 1 | 0 | 1.189046  | -1.178946 | 2.001516  |
| 24 | 6 | 0 | 2.657871  | -3.175109 | 3.020706  |
| 25 | 1 | 0 | 2.166883  | -3.870136 | 1.059999  |
| 26 | 1 | 0 | 1.472895  | -2.531780 | -1.324789 |
| 27 | 1 | 0 | 2.450216  | -1.213749 | -1.986331 |
| 28 | 1 | 0 | 4.474205  | -2.200329 | -1.233118 |
| 29 | 1 | 0 | 4.617473  | -3.100948 | 1.150886  |
| 30 | 1 | 0 | 3.528984  | -3.669103 | -0.995006 |
| 31 | 1 | 0 | 0.517701  | 1.740356  | 1.052633  |
| 32 | 6 | 0 | -1.385430 | 4.751307  | -1.513036 |
| 33 | 6 | 0 | -1.858934 | 5.701438  | -2.395135 |
| 34 | 6 | 0 | -1.021832 | 6.242663  | -3.361582 |
| 35 | 6 | 0 | 0.294303  | 5.819977  | -3.430911 |
| 36 | 6 | 0 | 0.784798  | 4.867316  | -2.552212 |
| 37 | 6 | 0 | 4.881881  | 2.121846  | 1.294492  |
| 38 | 6 | 0 | 5.867216  | 2.979477  | 1.875427  |
| 39 | 7 | 0 | 5.681674  | 3.714650  | 2.947618  |
| 40 | 6 | 0 | 4.404021  | 3.637153  | 3.522274  |
| 41 | 6 | 0 | 3.370969  | 2.827538  | 3.017575  |
| 42 | 6 | 0 | 4.174785  | 4.442530  | 4.681923  |
| 43 | 6 | 0 | 2.968145  | 4.441262  | 5.295282  |
| 44 | 6 | 0 | 1.915272  | 3.634574  | 4.782193  |
| 45 | 6 | 0 | 2.107399  | 2.857935  | 3.688409  |
| 46 | 1 | 0 | -1.395093 | 6.987407  | -4.051250 |
| 47 | 1 | 0 | -2.890512 | 6.023680  | -2.328313 |
| 48 | 1 | 0 | -2.037353 | 4.330776  | -0.759264 |
| 49 | 1 | 0 | 0.956311  | 6.236783  | -4.179907 |
| 50 | 1 | 0 | 1.809560  | 4.527446  | -2.593012 |
| 51 | 1 | 0 | 5.152255  | 1.575513  | 0.403916  |
| 52 | 1 | 0 | 6.847663  | 3.032187  | 1.407275  |
| 53 | 1 | 0 | 4.996340  | 5.048950  | 5.041393  |
| 54 | 1 | 0 | 2.790802  | 5.052268  | 6.171175  |
| 55 | 1 | 0 | 0.950199  | 3.649532  | 5.273135  |
| 56 | 1 | 0 | 1.285771  | 2.268150  | 3.308949  |
| 57 | 6 | 0 | 1.816844  | -2.881117 | 3.978341  |
| 58 | 1 | 0 | 2.029880  | -3.139146 | 5.006821  |
| 59 | 1 | 0 | 0.873228  | -2.380436 | 3.810448  |
| 60 | 1 | 0 | 3.579732  | -3.696504 | 3.252658  |
| 61 | 6 | 0 | -1.570279 | -0.267059 | -1.263467 |
| 62 | 6 | 0 | -1.985506 | -1.700356 | -0.870190 |
| 63 | 8 | 0 | -3.301518 | -1.946670 | -0.936600 |
| 64 | 8 | 0 | -0.335325 | -0.049898 | -1.291685 |
| 65 | 6 | 0 | -2.467807 | 0.568471  | -2.149920 |
| 66 | 8 | 0 | -1.165136 | -2.550718 | -0.568524 |
| 67 | 6 | 0 | -3.724622 | -3.261348 | -0.528140 |
| 68 | 1 | 0 | -3.257154 | -4.024342 | -1.155973 |
| 69 | 1 | 0 | -3.457617 | -3.430737 | 0.518284  |
| 70 | 1 | 0 | -4.807407 | -3.265901 | -0.656083 |

|    |    |   |           |           |           |
|----|----|---|-----------|-----------|-----------|
| 71 | 6  | 0 | -1.827200 | 1.298424  | -3.165567 |
| 72 | 6  | 0 | -2.565018 | 2.074575  | -4.062029 |
| 73 | 6  | 0 | -3.955605 | 2.143282  | -3.949823 |
| 74 | 6  | 0 | -4.600531 | 1.430189  | -2.933067 |
| 75 | 6  | 0 | -3.867097 | 0.648536  | -2.040322 |
| 76 | 1  | 0 | -0.746092 | 1.248511  | -3.238866 |
| 77 | 1  | 0 | -2.050020 | 2.628403  | -4.843307 |
| 78 | 1  | 0 | -4.532816 | 2.749695  | -4.643671 |
| 79 | 1  | 0 | -5.681638 | 1.486429  | -2.830308 |
| 80 | 1  | 0 | -4.380213 | 0.119800  | -1.246990 |
| 81 | 15 | 0 | -2.215130 | 0.645062  | 1.031723  |
| 82 | 8  | 0 | -3.757023 | 1.149404  | 1.443404  |
| 83 | 6  | 0 | -4.141122 | 2.523653  | 1.317749  |
| 84 | 1  | 0 | -3.381955 | 3.183568  | 1.748967  |
| 85 | 1  | 0 | -5.081932 | 2.633531  | 1.864787  |
| 86 | 1  | 0 | -4.304233 | 2.789543  | 0.265992  |
| 87 | 8  | 0 | -2.038184 | -0.542221 | 2.184918  |
| 88 | 6  | 0 | -2.184136 | -0.226633 | 3.579774  |
| 89 | 1  | 0 | -3.217330 | 0.060183  | 3.800570  |
| 90 | 1  | 0 | -1.927756 | -1.133112 | 4.135314  |
| 91 | 1  | 0 | -1.509963 | 0.588155  | 3.868261  |
| 92 | 8  | 0 | -1.247452 | 1.805826  | 1.330198  |

**(R)-ds-TS2**

Standard orientation:

| Center Number | Atomic Number | Atomic Type | Coordinates (Angstroms) |           |           |
|---------------|---------------|-------------|-------------------------|-----------|-----------|
|               |               |             | X                       | Y         | Z         |
| 1             | 7             | 0           | 18.933385               | -0.748293 | 0.258994  |
| 2             | 6             | 0           | 17.620474               | -0.493225 | 0.602865  |
| 3             | 7             | 0           | 16.826775               | -0.464384 | -0.498904 |
| 4             | 16            | 0           | 17.041359               | -0.233442 | 2.168132  |
| 5             | 6             | 0           | 20.103278               | -0.996919 | 1.033577  |
| 6             | 6             | 0           | 15.402394               | -0.142575 | -0.609113 |
| 7             | 6             | 0           | 14.581512               | -1.458153 | -0.350439 |
| 8             | 6             | 0           | 14.113722               | -1.946708 | 1.044463  |
| 9             | 6             | 0           | 12.771324               | -2.690693 | 0.884550  |
| 10            | 7             | 0           | 13.378228               | -1.536169 | -1.293490 |
| 11            | 6             | 0           | 12.163910               | -0.862835 | -0.724521 |
| 12            | 6             | 0           | 11.646803               | -1.687738 | 0.488238  |
| 13            | 6             | 0           | 13.076190               | -2.985591 | -1.583565 |
| 14            | 6             | 0           | 12.903651               | -3.733795 | -0.242947 |
| 15            | 1             | 0           | 15.283817               | -0.016457 | -1.690586 |
| 16            | 6             | 0           | 15.067414               | 1.258979  | -0.013679 |
| 17            | 1             | 0           | 15.248155               | -2.207807 | -0.774715 |
| 18            | 1             | 0           | 14.023238               | -1.142813 | 1.771791  |
| 19            | 1             | 0           | 14.878996               | -2.617069 | 1.447243  |
| 20            | 1             | 0           | 11.430566               | -0.785326 | -1.530879 |
| 21            | 1             | 0           | 12.465551               | 0.146968  | -0.447078 |
| 22            | 6             | 0           | 11.140695               | -0.843747 | 1.675384  |
| 23            | 1             | 0           | 10.790016               | -2.295252 | 0.149014  |
| 24            | 1             | 0           | 12.166199               | -2.993854 | -2.190839 |
| 25            | 1             | 0           | 13.906865               | -3.349864 | -2.190454 |
| 26            | 1             | 0           | 13.765667               | -4.383095 | -0.051491 |
| 27            | 1             | 0           | 12.507121               | -3.185839 | 1.824575  |
| 28            | 1             | 0           | 12.017215               | -4.377370 | -0.283337 |
| 29            | 1             | 0           | 19.098582               | -0.791140 | -0.746367 |
| 30            | 1             | 0           | 17.219800               | -0.791551 | -1.385445 |
| 31            | 6             | 0           | 15.699445               | 2.414297  | -0.625428 |
| 32            | 6             | 0           | 15.396621               | 3.686308  | -0.107097 |



|    |    |   |           |           |           |
|----|----|---|-----------|-----------|-----------|
| 33 | 6  | 0 | 14.210803 | 1.490832  | 1.007116  |
| 34 | 6  | 0 | 13.962177 | 2.823364  | 1.462820  |
| 35 | 7  | 0 | 14.511070 | 3.903286  | 0.960480  |
| 36 | 6  | 0 | 16.606149 | 2.347692  | -1.730486 |
| 37 | 6  | 0 | 15.997774 | 4.852476  | -0.675038 |
| 38 | 6  | 0 | 10.689196 | 0.382684  | 1.617337  |
| 39 | 1  | 0 | 11.134094 | -1.377382 | 2.619255  |
| 40 | 1  | 0 | 10.655832 | 0.959024  | 0.703195  |
| 41 | 1  | 0 | 10.318297 | 0.886568  | 2.499325  |
| 42 | 6  | 0 | 21.280433 | -1.273316 | 0.329863  |
| 43 | 6  | 0 | 20.129758 | -0.980314 | 2.426432  |
| 44 | 6  | 0 | 22.455353 | -1.527382 | 1.009235  |
| 45 | 6  | 0 | 22.481100 | -1.512720 | 2.396810  |
| 46 | 6  | 0 | 21.316212 | -1.239078 | 3.093663  |
| 47 | 1  | 0 | 23.358836 | -1.739277 | 0.451201  |
| 48 | 1  | 0 | 21.261711 | -1.285939 | -0.751578 |
| 49 | 1  | 0 | 23.402444 | -1.711934 | 2.927044  |
| 50 | 1  | 0 | 21.325984 | -1.223638 | 4.176616  |
| 51 | 1  | 0 | 19.213183 | -0.759626 | 2.954650  |
| 52 | 1  | 0 | 13.696084 | 0.698612  | 1.521098  |
| 53 | 1  | 0 | 13.269727 | 2.962374  | 2.290103  |
| 54 | 1  | 0 | 13.623022 | -1.091224 | -2.225295 |
| 55 | 6  | 0 | 16.856987 | 4.749420  | -1.715835 |
| 56 | 6  | 0 | 17.161188 | 3.469249  | -2.251935 |
| 57 | 1  | 0 | 16.858415 | 1.390488  | -2.160483 |
| 58 | 1  | 0 | 17.844011 | 3.394624  | -3.088763 |
| 59 | 1  | 0 | 17.313692 | 5.630679  | -2.148028 |
| 60 | 1  | 0 | 15.738139 | 5.809990  | -0.242110 |
| 61 | 6  | 0 | 17.635411 | -1.268801 | -4.119787 |
| 62 | 6  | 0 | 16.371470 | -2.168595 | -4.064766 |
| 63 | 8  | 0 | 18.109762 | -0.750677 | -3.118710 |
| 64 | 8  | 0 | 18.172357 | -1.118062 | -5.333830 |
| 65 | 6  | 0 | 19.305367 | -0.233117 | -5.434131 |
| 66 | 1  | 0 | 19.022253 | 0.771878  | -5.111839 |
| 67 | 1  | 0 | 20.129668 | -0.600652 | -4.817522 |
| 68 | 1  | 0 | 19.580582 | -0.239084 | -6.489075 |
| 69 | 8  | 0 | 15.978039 | -2.430950 | -2.890200 |
| 70 | 6  | 0 | 16.252725 | -3.260272 | -5.129670 |
| 71 | 6  | 0 | 16.369537 | -3.058585 | -6.514483 |
| 72 | 6  | 0 | 16.022767 | -4.562517 | -4.659360 |
| 73 | 6  | 0 | 16.260104 | -4.132969 | -7.399131 |
| 74 | 1  | 0 | 16.531940 | -2.061993 | -6.907380 |
| 75 | 6  | 0 | 15.916722 | -5.638485 | -5.544491 |
| 76 | 1  | 0 | 15.940562 | -4.715502 | -3.588043 |
| 77 | 6  | 0 | 16.033940 | -5.427865 | -6.920279 |
| 78 | 1  | 0 | 16.347495 | -3.955623 | -8.468555 |
| 79 | 1  | 0 | 15.746708 | -6.640610 | -5.157400 |
| 80 | 1  | 0 | 15.950289 | -6.261509 | -7.613415 |
| 81 | 8  | 0 | 13.782122 | -0.424157 | -3.708842 |
| 82 | 15 | 0 | 14.870070 | -0.534712 | -4.785928 |
| 83 | 8  | 0 | 14.125953 | -0.661509 | -6.266849 |
| 84 | 6  | 0 | 12.994133 | -1.524963 | -6.431757 |
| 85 | 1  | 0 | 13.287447 | -2.577462 | -6.340959 |
| 86 | 1  | 0 | 12.613891 | -1.344020 | -7.440454 |
| 87 | 1  | 0 | 12.218063 | -1.290544 | -5.695930 |
| 88 | 8  | 0 | 15.627863 | 0.904065  | -5.018801 |
| 89 | 6  | 0 | 14.870436 | 2.104371  | -5.268566 |
| 90 | 1  | 0 | 14.133043 | 2.265643  | -4.475539 |
| 91 | 1  | 0 | 15.590084 | 2.926006  | -5.277008 |
| 92 | 1  | 0 | 14.367209 | 2.038730  | -6.238154 |

**(R)-ms-TS2**

Standard orientation:

| Center<br>Number | Atomic<br>Number | Atomic<br>Type | Coordinates (Angstroms) |           |           |
|------------------|------------------|----------------|-------------------------|-----------|-----------|
|                  |                  |                | X                       | Y         | Z         |
| 1                | 1                | 0              | -1.264474               | -0.557474 | 0.209105  |
| 2                | 7                | 0              | 0.635214                | 3.209086  | -0.071826 |
| 3                | 6                | 0              | -0.685584               | 2.873029  | -0.227552 |
| 4                | 7                | 0              | -0.824726               | 1.762326  | -1.015087 |
| 5                | 16               | 0              | -2.005229               | 3.687404  | 0.460349  |
| 6                | 6                | 0              | 1.276419                | 4.243097  | 0.665083  |
| 7                | 6                | 0              | -2.051971               | 1.230299  | -1.604017 |
| 8                | 6                | 0              | -2.961808               | 0.563303  | -0.538304 |
| 9                | 6                | 0              | -4.361496               | 0.106340  | -1.014750 |
| 10               | 6                | 0              | -4.751948               | -1.203884 | -0.300326 |
| 11               | 7                | 0              | -2.283494               | -0.686820 | 0.031978  |
| 12               | 6                | 0              | -2.431326               | -1.882195 | -0.887634 |
| 13               | 6                | 0              | -3.901274               | -2.364855 | -0.883171 |
| 14               | 6                | 0              | -2.899189               | -0.996188 | 1.374917  |
| 15               | 6                | 0              | -4.432642               | -1.071779 | 1.203084  |
| 16               | 1                | 0              | 1.285694                | 2.559519  | -0.542809 |
| 17               | 1                | 0              | -1.698342               | 0.416350  | -2.245133 |
| 18               | 6                | 0              | -2.745721               | 2.252479  | -2.552089 |
| 19               | 1                | 0              | -3.045074               | 1.250298  | 0.304650  |
| 20               | 1                | 0              | -4.377028               | -0.043854 | -2.102532 |
| 21               | 1                | 0              | -5.090873               | 0.889000  | -0.791892 |
| 22               | 1                | 0              | -1.716211               | -2.625630 | -0.542878 |
| 23               | 1                | 0              | -2.109434               | -1.552019 | -1.874561 |
| 24               | 6                | 0              | -4.421258               | -2.859557 | -2.247758 |
| 25               | 1                | 0              | -3.989267               | -3.215530 | -0.186007 |
| 26               | 1                | 0              | -2.454992               | -1.938847 | 1.701991  |
| 27               | 1                | 0              | -2.572320               | -0.211702 | 2.059077  |
| 28               | 1                | 0              | -4.911741               | -0.175203 | 1.612793  |
| 29               | 1                | 0              | -5.818279               | -1.405806 | -0.442375 |
| 30               | 1                | 0              | -4.826958               | -1.930459 | 1.757762  |
| 31               | 1                | 0              | 0.058072                | 1.333109  | -1.327762 |
| 32               | 6                | 0              | 0.606456                | 5.196228  | 1.430943  |
| 33               | 6                | 0              | 1.326545                | 6.162654  | 2.114567  |
| 34               | 6                | 0              | 2.708732                | 6.200339  | 2.050429  |
| 35               | 6                | 0              | 3.378291                | 5.254047  | 1.286579  |
| 36               | 6                | 0              | 2.674916                | 4.284796  | 0.600187  |
| 37               | 1                | 0              | 3.261853                | 6.958733  | 2.587553  |
| 38               | 1                | 0              | 4.459219                | 5.272201  | 1.225072  |
| 39               | 1                | 0              | 3.196762                | 3.549421  | 0.003295  |
| 40               | 1                | 0              | 0.793570                | 6.896795  | 2.706179  |
| 41               | 1                | 0              | -0.472350               | 5.154718  | 1.469833  |
| 42               | 6                | 0              | -3.817439               | 2.993273  | -2.186573 |
| 43               | 6                | 0              | -4.405222               | 3.915087  | -3.107702 |
| 44               | 7                | 0              | -3.980631               | 4.121521  | -4.333002 |
| 45               | 6                | 0              | -2.852602               | 3.380810  | -4.716862 |
| 46               | 6                | 0              | -2.203814               | 2.456827  | -3.877814 |
| 47               | 6                | 0              | -2.359508               | 3.610936  | -6.039592 |
| 48               | 6                | 0              | -1.263764               | 2.957278  | -6.491409 |
| 49               | 6                | 0              | -0.592603               | 2.034641  | -5.642714 |
| 50               | 6                | 0              | -1.043476               | 1.792494  | -4.387862 |
| 51               | 6                | 0              | -3.702744               | -3.191038 | -3.289264 |
| 52               | 1                | 0              | -4.168062               | -3.557113 | -4.194376 |
| 53               | 1                | 0              | -2.623509               | -3.130394 | -3.314047 |
| 54               | 1                | 0              | -5.500124               | -2.961518 | -2.281276 |
| 55               | 1                | 0              | -0.885573               | 3.132818  | -7.490445 |
| 56               | 1                | 0              | -2.890635               | 4.326332  | -6.654477 |

|    |    |   |           |           |           |
|----|----|---|-----------|-----------|-----------|
| 57 | 1  | 0 | 0.291850  | 1.527219  | -6.007365 |
| 58 | 1  | 0 | -0.501173 | 1.101037  | -3.759811 |
| 59 | 1  | 0 | -4.245531 | 2.922794  | -1.198705 |
| 60 | 1  | 0 | -5.270660 | 4.489000  | -2.783962 |
| 61 | 15 | 0 | 2.418595  | -0.393602 | -1.014809 |
| 62 | 8  | 0 | 4.080283  | -0.316374 | -1.219743 |
| 63 | 6  | 0 | 4.795616  | 0.859516  | -0.843633 |
| 64 | 1  | 0 | 4.735365  | 1.037869  | 0.239111  |
| 65 | 1  | 0 | 4.414731  | 1.737101  | -1.377079 |
| 66 | 1  | 0 | 5.841025  | 0.689364  | -1.115812 |
| 67 | 8  | 0 | 2.100351  | -1.521084 | -2.172079 |
| 68 | 6  | 0 | 2.492715  | -1.300782 | -3.535740 |
| 69 | 1  | 0 | 3.582752  | -1.339871 | -3.629556 |
| 70 | 1  | 0 | 2.042667  | -2.106499 | -4.121994 |
| 71 | 1  | 0 | 2.128319  | -0.332197 | -3.896827 |
| 72 | 8  | 0 | 1.833210  | 0.972222  | -1.433893 |
| 73 | 6  | 0 | 1.270963  | -1.641890 | 0.864547  |
| 74 | 6  | 0 | 1.161894  | -0.350336 | 1.700742  |
| 75 | 8  | 0 | 2.260065  | 0.009411  | 2.379607  |
| 76 | 8  | 0 | 0.181246  | -1.989125 | 0.347707  |
| 77 | 8  | 0 | 0.112171  | 0.267742  | 1.752879  |
| 78 | 6  | 0 | 2.150766  | 1.205560  | 3.180174  |
| 79 | 1  | 0 | 1.892457  | 2.060151  | 2.550890  |
| 80 | 1  | 0 | 1.385275  | 1.075524  | 3.949205  |
| 81 | 1  | 0 | 3.134019  | 1.335880  | 3.633123  |
| 82 | 6  | 0 | 2.294390  | -2.699003 | 1.210528  |
| 83 | 6  | 0 | 3.623148  | -2.446093 | 1.588301  |
| 84 | 6  | 0 | 4.471207  | -3.496823 | 1.938886  |
| 85 | 6  | 0 | 4.011338  | -4.817619 | 1.919516  |
| 86 | 6  | 0 | 1.846913  | -4.030284 | 1.179151  |
| 87 | 6  | 0 | 2.694534  | -5.080489 | 1.534668  |
| 88 | 1  | 0 | 4.002059  | -1.431954 | 1.592890  |
| 89 | 1  | 0 | 5.498991  | -3.282935 | 2.221915  |
| 90 | 1  | 0 | 4.675589  | -5.632813 | 2.196258  |
| 91 | 1  | 0 | 0.824068  | -4.224174 | 0.874184  |
| 92 | 1  | 0 | 2.325385  | -6.103170 | 1.511143  |

-----  
*(S)*-Py-CAT

Standard orientation:

| Center<br>Number | Atomic<br>Number | Atomic<br>Type | Coordinates (Angstroms) |           |           |
|------------------|------------------|----------------|-------------------------|-----------|-----------|
|                  |                  |                | X                       | Y         | Z         |
| 1                | 7                | 0              | -2.652509               | -0.417443 | -0.857441 |
| 2                | 6                | 0              | -1.560931               | -0.188227 | -0.028140 |
| 3                | 7                | 0              | -0.548545               | 0.418604  | -0.710203 |
| 4                | 16               | 0              | -1.514424               | -0.619696 | 1.592527  |
| 5                | 6                | 0              | -3.991079               | -0.772719 | -0.517219 |
| 6                | 6                | 0              | 0.892933                | 0.497574  | -0.404023 |
| 7                | 6                | 0              | 1.524015                | -0.870514 | -0.057516 |
| 8                | 6                | 0              | 3.059644                | -0.775908 | 0.190231  |
| 9                | 6                | 0              | 3.719979                | -2.014836 | -0.452363 |
| 10               | 7                | 0              | 1.227348                | -1.884636 | -1.096259 |
| 11               | 6                | 0              | 1.511936                | -3.211822 | -0.516707 |
| 12               | 6                | 0              | 2.987607                | -3.314680 | 0.006941  |
| 13               | 6                | 0              | 2.062857                | -1.704095 | -2.298950 |
| 14               | 6                | 0              | 3.577969                | -1.891895 | -1.981868 |
| 15               | 1                | 0              | -2.415078               | -0.584110 | -1.832862 |
| 16               | 6                | 0              | 1.233200                | 1.630766  | 0.606445  |
| 17               | 1                | 0              | 1.327220                | 0.820037  | -1.357537 |
| 18               | 1                | 0              | 3.272587                | -0.727715 | 1.264547  |

|    |   |   |           |           |           |
|----|---|---|-----------|-----------|-----------|
| 19 | 1 | 0 | 3.486393  | 0.133355  | -0.259429 |
| 20 | 1 | 0 | 1.332757  | -3.959061 | -1.298247 |
| 21 | 1 | 0 | 0.779388  | -3.395390 | 0.271997  |
| 22 | 6 | 0 | 3.200222  | -3.569780 | 1.514733  |
| 23 | 1 | 0 | 3.485565  | -4.152890 | -0.509435 |
| 24 | 1 | 0 | 1.720262  | -2.427059 | -3.048526 |
| 25 | 1 | 0 | 1.869099  | -0.710239 | -2.717838 |
| 26 | 1 | 0 | 4.166964  | -1.040445 | -2.348320 |
| 27 | 1 | 0 | 4.778451  | -2.066423 | -0.172264 |
| 28 | 1 | 0 | 3.975688  | -2.790209 | -2.472177 |
| 29 | 1 | 0 | -0.793136 | 0.751978  | -1.634123 |
| 30 | 6 | 0 | -4.603895 | -0.353378 | 0.663757  |
| 31 | 6 | 0 | -5.923423 | -0.690525 | 0.911587  |
| 32 | 6 | 0 | -6.652654 | -1.430329 | -0.006752 |
| 33 | 6 | 0 | -6.049415 | -1.834202 | -1.187596 |
| 34 | 6 | 0 | -4.729392 | -1.511054 | -1.443972 |
| 35 | 1 | 0 | -6.388276 | -0.363819 | 1.833574  |
| 36 | 1 | 0 | -7.683878 | -1.686962 | 0.194707  |
| 37 | 1 | 0 | -6.609108 | -2.408255 | -1.915512 |
| 38 | 1 | 0 | -4.260090 | -1.826205 | -2.366194 |
| 39 | 1 | 0 | -4.040656 | 0.223461  | 1.382014  |
| 40 | 6 | 0 | 1.702638  | 2.850402  | 0.134883  |
| 41 | 6 | 0 | 2.004802  | 3.865039  | 1.031393  |
| 42 | 7 | 0 | 1.874904  | 3.757034  | 2.372840  |
| 43 | 6 | 0 | 1.414574  | 2.560579  | 2.809040  |
| 44 | 6 | 0 | 1.090895  | 1.495084  | 1.982518  |
| 45 | 1 | 0 | 1.838985  | 3.018129  | -0.924946 |
| 46 | 1 | 0 | 0.705514  | 0.577950  | 2.406054  |
| 47 | 6 | 0 | 2.301692  | -3.657956 | 2.461068  |
| 48 | 1 | 0 | 2.587345  | -3.847737 | 3.486344  |
| 49 | 1 | 0 | 1.240574  | -3.551474 | 2.290269  |
| 50 | 1 | 0 | 4.248020  | -3.688483 | 1.771822  |
| 51 | 1 | 0 | 1.039063  | -1.233108 | 0.849301  |
| 52 | 1 | 0 | 2.373157  | 4.819156  | 0.663901  |
| 53 | 1 | 0 | 1.302203  | 2.460410  | 3.885364  |

-----  
**(S)-Py-ds-TS2**

Standard orientation:

| Center<br>Number | Atomic<br>Number | Atomic<br>Type | Coordinates (Angstroms) |           |           |
|------------------|------------------|----------------|-------------------------|-----------|-----------|
|                  |                  |                | X                       | Y         | Z         |
| 1                | 7                | 0              | -0.319046               | 2.647150  | -0.175128 |
| 2                | 6                | 0              | -1.274058               | 1.682299  | -0.355520 |
| 3                | 7                | 0              | -0.950322               | 0.522363  | 0.284069  |
| 4                | 16               | 0              | -2.694131               | 1.858465  | -1.274526 |
| 5                | 6                | 0              | -0.203749               | 3.989341  | -0.644910 |
| 6                | 6                | 0              | -1.762275               | -0.681714 | 0.456181  |
| 7                | 6                | 0              | -1.966963               | -1.456842 | -0.861989 |
| 8                | 6                | 0              | -2.805216               | -2.750428 | -0.738020 |
| 9                | 6                | 0              | -2.201478               | -3.844378 | -1.641406 |
| 10               | 7                | 0              | -0.628283               | -1.852594 | -1.473997 |
| 11               | 6                | 0              | -0.848476               | -2.169848 | -2.931001 |
| 12               | 6                | 0              | -1.935805               | -3.271473 | -3.067820 |
| 13               | 6                | 0              | 0.010754                | -3.037591 | -0.791006 |
| 14               | 6                | 0              | -0.860717               | -4.289729 | -1.029211 |
| 15               | 1                | 0              | 0.469698                | 2.361806  | 0.415497  |
| 16               | 6                | 0              | -3.061851               | -0.418231 | 1.268521  |
| 17               | 1                | 0              | -1.132160               | -1.302719 | 1.102808  |
| 18               | 1                | 0              | -3.840602               | -2.541236 | -1.021514 |
| 19               | 1                | 0              | -2.823973               | -3.103539 | 0.302229  |

|    |    |   |           |           |           |
|----|----|---|-----------|-----------|-----------|
| 20 | 1  | 0 | 0.118748  | -2.488323 | -3.323842 |
| 21 | 1  | 0 | -1.108118 | -1.230586 | -3.417487 |
| 22 | 6  | 0 | -3.251464 | -2.881186 | -3.772450 |
| 23 | 1  | 0 | -1.503942 | -4.092787 | -3.661324 |
| 24 | 1  | 0 | 1.013291  | -3.121402 | -1.214459 |
| 25 | 1  | 0 | 0.133781  | -2.773108 | 0.259070  |
| 26 | 1  | 0 | -1.032473 | -4.812175 | -0.081368 |
| 27 | 1  | 0 | -2.885935 | -4.696263 | -1.710435 |
| 28 | 1  | 0 | -0.353131 | -4.996533 | -1.696653 |
| 29 | 1  | 0 | -0.014049 | 0.413588  | 0.701379  |
| 30 | 6  | 0 | -1.145971 | 4.621467  | -1.452735 |
| 31 | 6  | 0 | -0.939922 | 5.932504  | -1.852828 |
| 32 | 6  | 0 | 0.190816  | 6.627475  | -1.460738 |
| 33 | 6  | 0 | 1.130039  | 5.998181  | -0.654663 |
| 34 | 6  | 0 | 0.939658  | 4.692985  | -0.248143 |
| 35 | 1  | 0 | -1.679187 | 6.414241  | -2.480782 |
| 36 | 1  | 0 | 0.342362  | 7.650391  | -1.777752 |
| 37 | 1  | 0 | 2.018969  | 6.530603  | -0.340411 |
| 38 | 1  | 0 | 1.669758  | 4.199887  | 0.379477  |
| 39 | 1  | 0 | -2.023991 | 4.065820  | -1.748549 |
| 40 | 1  | 0 | 0.094610  | -1.083676 | -1.439540 |
| 41 | 6  | 0 | -2.962997 | -0.338543 | 2.653322  |
| 42 | 6  | 0 | -4.096964 | -0.085694 | 3.409026  |
| 43 | 7  | 0 | -5.333344 | 0.092850  | 2.887581  |
| 44 | 6  | 0 | -5.403657 | 0.014239  | 1.539495  |
| 45 | 6  | 0 | -4.318893 | -0.232993 | 0.708535  |
| 46 | 1  | 0 | -4.467584 | -0.260771 | -0.360777 |
| 47 | 6  | 0 | -3.606968 | -1.714086 | -4.243124 |
| 48 | 1  | 0 | -4.564202 | -1.579455 | -4.727995 |
| 49 | 1  | 0 | -2.991790 | -0.827255 | -4.186366 |
| 50 | 1  | 0 | -3.927196 | -3.723666 | -3.871425 |
| 51 | 1  | 0 | -2.411323 | -0.774343 | -1.586933 |
| 52 | 1  | 0 | -6.389302 | 0.160253  | 1.105644  |
| 53 | 1  | 0 | -4.023130 | -0.024175 | 4.491546  |
| 54 | 1  | 0 | -2.008538 | -0.472047 | 3.145009  |
| 55 | 6  | 0 | 2.916009  | 0.973893  | 1.450177  |
| 56 | 6  | 0 | 2.544332  | -0.502300 | 1.188684  |
| 57 | 8  | 0 | 2.109049  | 1.883123  | 1.328837  |
| 58 | 8  | 0 | 1.300684  | -0.747731 | 1.246844  |
| 59 | 8  | 0 | 4.180588  | 1.172527  | 1.835827  |
| 60 | 6  | 0 | 4.587424  | 2.542833  | 2.024364  |
| 61 | 1  | 0 | 4.512334  | 3.085714  | 1.078613  |
| 62 | 1  | 0 | 3.959964  | 3.024374  | 2.778419  |
| 63 | 1  | 0 | 5.623641  | 2.489341  | 2.359028  |
| 64 | 6  | 0 | 3.510056  | -1.579223 | 1.660264  |
| 65 | 6  | 0 | 4.884178  | -1.603460 | 1.377902  |
| 66 | 6  | 0 | 5.693942  | -2.621005 | 1.882035  |
| 67 | 6  | 0 | 5.147333  | -3.633758 | 2.677721  |
| 68 | 6  | 0 | 2.969458  | -2.602268 | 2.454037  |
| 69 | 6  | 0 | 3.780089  | -3.620595 | 2.962118  |
| 70 | 1  | 0 | 5.321264  | -0.838199 | 0.747156  |
| 71 | 1  | 0 | 6.755427  | -2.627156 | 1.646037  |
| 72 | 1  | 0 | 5.782149  | -4.425206 | 3.069050  |
| 73 | 1  | 0 | 3.343186  | -4.399396 | 3.583110  |
| 74 | 1  | 0 | 1.907295  | -2.577883 | 2.675326  |
| 75 | 8  | 0 | 1.613251  | -0.465289 | -1.857602 |
| 76 | 15 | 0 | 2.948329  | -0.284264 | -1.130992 |
| 77 | 8  | 0 | 4.050224  | -1.391948 | -1.666725 |
| 78 | 6  | 0 | 4.380495  | -1.476827 | -3.060884 |
| 79 | 1  | 0 | 5.051838  | -2.332194 | -3.171484 |
| 80 | 1  | 0 | 4.893407  | -0.565314 | -3.388322 |
| 81 | 1  | 0 | 3.480971  | -1.632969 | -3.667724 |

|    |   |   |          |          |           |
|----|---|---|----------|----------|-----------|
| 82 | 8 | 0 | 3.631973 | 1.144719 | -1.634690 |
| 83 | 6 | 0 | 2.997268 | 1.991335 | -2.608574 |
| 84 | 1 | 0 | 3.162091 | 1.602822 | -3.620381 |
| 85 | 1 | 0 | 1.922463 | 2.070075 | -2.426338 |
| 86 | 1 | 0 | 3.467278 | 2.973811 | -2.514496 |

(S)-Py-ms-TS2

Standard orientation:

| Center Number | Atomic Number | Atomic Type | Coordinates (Angstroms) |           |           |
|---------------|---------------|-------------|-------------------------|-----------|-----------|
|               |               |             | X                       | Y         | Z         |
| 1             | 6             | 0           | 1.806639                | 0.334932  | -2.943618 |
| 2             | 6             | 0           | 1.167453                | -2.070304 | -2.011194 |
| 3             | 6             | 0           | 1.019638                | -0.535872 | -1.994339 |
| 4             | 8             | 0           | -0.066803               | -0.105053 | -1.547413 |
| 5             | 8             | 0           | 2.292024                | -2.529040 | -2.578028 |
| 6             | 6             | 0           | 2.477246                | -3.957381 | -2.558895 |
| 7             | 1             | 0           | 2.512761                | -4.314063 | -1.526238 |
| 8             | 1             | 0           | 1.663647                | -4.454276 | -3.093685 |
| 9             | 1             | 0           | 3.430396                | -4.128704 | -3.059824 |
| 10            | 8             | 0           | 0.290630                | -2.803700 | -1.586362 |
| 11            | 6             | 0           | 1.124011                | 1.444772  | -3.471035 |
| 12            | 6             | 0           | 1.744243                | 2.296516  | -4.386964 |
| 13            | 6             | 0           | 3.063068                | 2.059501  | -4.781886 |
| 14            | 6             | 0           | 3.136745                | 0.108841  | -3.340240 |
| 15            | 6             | 0           | 3.755422                | 0.965685  | -4.250603 |
| 16            | 1             | 0           | 0.104526                | 1.627868  | -3.149388 |
| 17            | 1             | 0           | 1.196607                | 3.146791  | -4.786149 |
| 18            | 1             | 0           | 3.550438                | 2.722429  | -5.492727 |
| 19            | 1             | 0           | 4.786420                | 0.780392  | -4.542311 |
| 20            | 1             | 0           | 3.693952                | -0.720052 | -2.923114 |
| 21            | 8             | 0           | 2.036646                | 0.813916  | 0.936177  |
| 22            | 15            | 0           | 2.547422                | -0.390124 | 0.117905  |
| 23            | 8             | 0           | 2.405554                | -1.778895 | 1.025759  |
| 24            | 6             | 0           | 3.010075                | -1.860490 | 2.327307  |
| 25            | 1             | 0           | 2.686260                | -2.809156 | 2.764815  |
| 26            | 1             | 0           | 4.101569                | -1.847237 | 2.242689  |
| 27            | 1             | 0           | 2.683554                | -1.028814 | 2.962395  |
| 28            | 8             | 0           | 4.221280                | -0.301542 | 0.085254  |
| 29            | 6             | 0           | 4.885822                | 0.966223  | 0.074062  |
| 30            | 1             | 0           | 5.946263                | 0.761890  | 0.247918  |
| 31            | 1             | 0           | 4.499775                | 1.617876  | 0.864296  |
| 32            | 1             | 0           | 4.771238                | 1.461787  | -0.898222 |
| 33            | 7             | 0           | 0.408121                | 3.049542  | 0.016253  |
| 34            | 6             | 0           | -0.802110               | 2.596308  | 0.467013  |
| 35            | 7             | 0           | -0.654194               | 1.471865  | 1.232697  |
| 36            | 16            | 0           | -2.317080               | 3.286552  | 0.136013  |
| 37            | 6             | 0           | 0.773665                | 4.162022  | -0.791375 |
| 38            | 6             | 0           | -1.665086               | 0.774076  | 2.017677  |
| 39            | 6             | 0           | -2.687296               | 0.011376  | 1.144295  |
| 40            | 6             | 0           | -3.741141               | -0.793813 | 1.941960  |
| 41            | 6             | 0           | -3.985158               | -2.154085 | 1.257886  |
| 42            | 7             | 0           | -1.983967               | -0.974606 | 0.219218  |
| 43            | 6             | 0           | -2.935938               | -1.382413 | -0.881311 |
| 44            | 6             | 0           | -4.244356               | -1.945050 | -0.264836 |
| 45            | 6             | 0           | -1.497381               | -2.207040 | 0.947539  |
| 46            | 6             | 0           | -2.721473               | -3.017272 | 1.428325  |
| 47            | 1             | 0           | 1.197701                | 2.434156  | 0.265805  |
| 48            | 6             | 0           | -2.296481               | 1.670654  | 3.122386  |
| 49            | 1             | 0           | -1.083668               | 0.018424  | 2.562006  |

|    |   |   |           |           |           |
|----|---|---|-----------|-----------|-----------|
| 50 | 1 | 0 | -4.669957 | -0.219617 | 2.002107  |
| 51 | 1 | 0 | -3.402044 | -0.958591 | 2.974120  |
| 52 | 1 | 0 | -2.400021 | -2.122216 | -1.477901 |
| 53 | 1 | 0 | -3.083274 | -0.498878 | -1.500749 |
| 54 | 6 | 0 | -5.542010 | -1.148938 | -0.513058 |
| 55 | 1 | 0 | -4.410415 | -2.944456 | -0.696637 |
| 56 | 1 | 0 | -0.862352 | -2.743501 | 0.243566  |
| 57 | 1 | 0 | -0.866053 | -1.869906 | 1.770382  |
| 58 | 1 | 0 | -2.594112 | -3.299352 | 2.479675  |
| 59 | 1 | 0 | -4.847220 | -2.652936 | 1.712835  |
| 60 | 1 | 0 | -2.815237 | -3.947860 | 0.856068  |
| 61 | 1 | 0 | 0.307200  | 1.103997  | 1.298401  |
| 62 | 1 | 0 | -1.166606 | -0.541368 | -0.279568 |
| 63 | 6 | 0 | -0.128161 | 5.101274  | -1.288389 |
| 64 | 6 | 0 | 0.331285  | 6.157642  | -2.058726 |
| 65 | 6 | 0 | 1.678215  | 6.298375  | -2.344085 |
| 66 | 6 | 0 | 2.578565  | 5.364991  | -1.848042 |
| 67 | 6 | 0 | 2.136448  | 4.307199  | -1.079653 |
| 68 | 1 | 0 | 2.838002  | 3.580952  | -0.691855 |
| 69 | 1 | 0 | 3.635460  | 5.463309  | -2.061994 |
| 70 | 1 | 0 | 2.027219  | 7.126642  | -2.945567 |
| 71 | 1 | 0 | -0.379421 | 6.880901  | -2.439199 |
| 72 | 1 | 0 | -1.176205 | 4.977947  | -1.056866 |
| 73 | 6 | 0 | -3.541626 | 2.278156  | 3.033243  |
| 74 | 6 | 0 | -3.986586 | 3.072877  | 4.081459  |
| 75 | 7 | 0 | -3.285364 | 3.311492  | 5.212587  |
| 76 | 6 | 0 | -2.071837 | 2.714227  | 5.272262  |
| 77 | 6 | 0 | -1.553167 | 1.904585  | 4.274036  |
| 78 | 1 | 0 | -1.494005 | 2.898240  | 6.174072  |
| 79 | 1 | 0 | -0.573256 | 1.462459  | 4.396133  |
| 80 | 1 | 0 | -4.165472 | 2.159843  | 2.159785  |
| 81 | 1 | 0 | -4.960556 | 3.550514  | 4.016158  |
| 82 | 1 | 0 | -3.161671 | 0.731065  | 0.476574  |
| 83 | 6 | 0 | -5.689777 | -0.008493 | -1.135584 |
| 84 | 1 | 0 | -6.412175 | -1.650380 | -0.103988 |
| 85 | 1 | 0 | -6.667449 | 0.440133  | -1.247303 |
| 86 | 1 | 0 | -4.874744 | 0.551865  | -1.571494 |

-----  
**(S)-Py-dr-TS2**

Standard orientation:

| Center Number | Atomic Number | Atomic Type | Coordinates (Angstroms) |           |           |
|---------------|---------------|-------------|-------------------------|-----------|-----------|
|               |               |             | X                       | Y         | Z         |
| 1             | 1             | 0           | 3.624956                | -1.984065 | -5.230189 |
| 2             | 6             | 0           | 2.561612                | 0.773667  | -3.562097 |
| 3             | 6             | 0           | 4.045498                | 0.947896  | -3.168865 |
| 4             | 6             | 0           | 4.504972                | -0.311559 | -2.380230 |
| 5             | 6             | 0           | 4.043857                | -1.541974 | -3.199177 |
| 6             | 6             | 0           | 2.467170                | -0.256496 | -4.706624 |
| 7             | 6             | 0           | 4.883998                | -0.316130 | -5.161449 |
| 8             | 6             | 0           | 4.912013                | 1.054007  | -4.441886 |
| 9             | 7             | 0           | 3.732313                | -1.117163 | -4.616229 |
| 10            | 1             | 0           | 5.786984                | -0.905872 | -4.981701 |
| 11            | 1             | 0           | 4.744231                | -0.238199 | -6.242218 |
| 12            | 1             | 0           | 5.944722                | 1.319331  | -4.188837 |
| 13            | 1             | 0           | 4.529114                | 1.845181  | -5.097496 |
| 14            | 1             | 0           | 5.608574                | -0.292335 | -2.354562 |
| 15            | 1             | 0           | 3.138065                | -1.991463 | -2.808269 |
| 16            | 1             | 0           | 2.578075                | 0.244798  | -5.673856 |
| 17            | 1             | 0           | 2.129235                | 1.724179  | -3.888441 |

|    |    |   |           |           |           |
|----|----|---|-----------|-----------|-----------|
| 18 | 1  | 0 | 4.169103  | 1.844831  | -2.554033 |
| 19 | 1  | 0 | 1.968838  | 0.446767  | -2.703401 |
| 20 | 7  | 0 | -0.468884 | -2.895041 | -2.129348 |
| 21 | 6  | 0 | -0.088892 | -1.721858 | -2.735655 |
| 22 | 7  | 0 | 0.864366  | -1.955436 | -3.690689 |
| 23 | 16 | 0 | -0.700151 | -0.184039 | -2.397128 |
| 24 | 6  | 0 | -1.200079 | -3.158034 | -0.936281 |
| 25 | 6  | 0 | 1.203391  | -1.144711 | -4.859106 |
| 26 | 1  | 0 | -0.189017 | -3.737643 | -2.641586 |
| 27 | 6  | 0 | -1.446418 | -4.500551 | -0.627922 |
| 28 | 6  | 0 | -2.131344 | -4.837953 | 0.522474  |
| 29 | 6  | 0 | -2.581171 | -3.849942 | 1.387312  |
| 30 | 6  | 0 | -2.337269 | -2.521215 | 1.083656  |
| 31 | 6  | 0 | -1.652863 | -2.166771 | -0.067719 |
| 32 | 1  | 0 | -2.315431 | -5.881173 | 0.747013  |
| 33 | 1  | 0 | -3.118052 | -4.116227 | 2.287590  |
| 34 | 1  | 0 | -2.685649 | -1.742164 | 1.750577  |
| 35 | 1  | 0 | -1.470496 | -1.132720 | -0.320883 |
| 36 | 1  | 0 | -1.094902 | -5.270904 | -1.300895 |
| 37 | 6  | 0 | -0.083125 | 0.902726  | -5.842311 |
| 38 | 6  | 0 | -0.026856 | -0.438180 | -5.497271 |
| 39 | 6  | 0 | -1.220526 | 1.397970  | -6.470891 |
| 40 | 7  | 0 | -2.303693 | 0.659128  | -6.788153 |
| 41 | 6  | 0 | -2.220974 | -0.651869 | -6.448023 |
| 42 | 1  | 0 | 0.729375  | 1.580882  | -5.632956 |
| 43 | 1  | 0 | 4.799327  | -2.327015 | -3.267573 |
| 44 | 1  | 0 | 1.266601  | -2.900759 | -3.709960 |
| 45 | 1  | 0 | 1.503591  | -1.893390 | -5.606723 |
| 46 | 6  | 0 | 4.033182  | -0.296494 | -0.913285 |
| 47 | 6  | 0 | 3.503838  | -1.286752 | -0.242614 |
| 48 | 1  | 0 | 3.229232  | -1.172258 | 0.797108  |
| 49 | 1  | 0 | 3.311276  | -2.261144 | -0.669089 |
| 50 | 1  | 0 | 4.211141  | 0.652693  | -0.420148 |
| 51 | 6  | 0 | -1.129438 | -1.226790 | -5.823374 |
| 52 | 1  | 0 | -1.134382 | -2.283715 | -5.592485 |
| 53 | 1  | 0 | -3.082812 | -1.263530 | -6.701496 |
| 54 | 1  | 0 | -1.266972 | 2.450474  | -6.738384 |
| 55 | 8  | 0 | 3.814700  | -5.306957 | -7.697101 |
| 56 | 8  | 0 | 3.570370  | -3.085731 | -6.391309 |
| 57 | 15 | 0 | 2.926752  | -4.481378 | -6.547124 |
| 58 | 6  | 0 | 5.244795  | -5.245846 | -7.684402 |
| 59 | 1  | 0 | 5.589758  | -4.207301 | -7.647411 |
| 60 | 1  | 0 | 5.582895  | -5.714246 | -8.612937 |
| 61 | 1  | 0 | 5.655014  | -5.801348 | -6.832143 |
| 62 | 8  | 0 | 1.512744  | -4.358777 | -7.395320 |
| 63 | 6  | 0 | 1.471722  | -3.736092 | -8.691180 |
| 64 | 1  | 0 | 1.953819  | -2.752402 | -8.666248 |
| 65 | 1  | 0 | 1.969229  | -4.369718 | -9.432012 |
| 66 | 1  | 0 | 0.415480  | -3.621625 | -8.947786 |
| 67 | 6  | 0 | 1.049026  | -5.751042 | -4.562611 |
| 68 | 6  | 0 | 2.495201  | -5.322874 | -4.223130 |
| 69 | 8  | 0 | 0.091290  | -5.094572 | -4.188529 |
| 70 | 8  | 0 | 2.578243  | -4.266892 | -3.550979 |
| 71 | 8  | 0 | 0.931976  | -6.888976 | -5.254379 |
| 72 | 6  | 0 | -0.405383 | -7.264404 | -5.643030 |
| 73 | 1  | 0 | -1.037051 | -7.388706 | -4.759973 |
| 74 | 1  | 0 | -0.827995 | -6.497069 | -6.296155 |
| 75 | 1  | 0 | -0.293258 | -8.208832 | -6.176003 |
| 76 | 6  | 0 | 3.581570  | -6.370777 | -4.083814 |
| 77 | 6  | 0 | 3.759367  | -7.470466 | -4.940830 |
| 78 | 6  | 0 | 4.779870  | -8.392179 | -4.704132 |
| 79 | 6  | 0 | 5.639975  | -8.236475 | -3.611664 |



|    |   |   |          |           |           |
|----|---|---|----------|-----------|-----------|
| 80 | 6 | 0 | 4.453088 | -6.220052 | -2.992519 |
| 81 | 6 | 0 | 5.471759 | -7.145577 | -2.755528 |
| 82 | 1 | 0 | 3.115134 | -7.598057 | -5.801812 |
| 83 | 1 | 0 | 4.906398 | -9.234139 | -5.380544 |
| 84 | 1 | 0 | 6.432159 | -8.959091 | -3.431248 |
| 85 | 1 | 0 | 6.130041 | -7.015476 | -1.899750 |
| 86 | 1 | 0 | 4.310260 | -5.371918 | -2.331020 |

(*S*)-*Py*-*mr*-**TS2**

Standard orientation:

| Center<br>Number | Atomic<br>Number | Atomic<br>Type | Coordinates (Angstroms) |           |           |
|------------------|------------------|----------------|-------------------------|-----------|-----------|
|                  |                  |                | X                       | Y         | Z         |
| 1                | 6                | 0              | 1.003805                | -0.558358 | -1.940684 |
| 2                | 6                | 0              | 1.374441                | -1.768346 | -1.064136 |
| 3                | 8                | 0              | 0.470607                | -2.113157 | -0.274174 |
| 4                | 6                | 0              | 2.489442                | -2.721724 | -1.369937 |
| 5                | 6                | 0              | 3.216883                | -2.742109 | -2.571985 |
| 6                | 6                | 0              | 2.750523                | -3.711714 | -0.404286 |
| 7                | 6                | 0              | 4.179103                | -3.729895 | -2.797563 |
| 8                | 1                | 0              | 3.036975                | -1.992698 | -3.331587 |
| 9                | 6                | 0              | 3.719560                | -4.685780 | -0.627435 |
| 10               | 1                | 0              | 2.192402                | -3.689506 | 0.525157  |
| 11               | 6                | 0              | 4.438023                | -4.701131 | -1.828598 |
| 12               | 1                | 0              | 4.728836                | -3.735078 | -3.735601 |
| 13               | 1                | 0              | 3.918672                | -5.433084 | 0.136715  |
| 14               | 1                | 0              | 5.193616                | -5.462746 | -2.005263 |
| 15               | 6                | 0              | 1.561547                | 1.016975  | -3.608536 |
| 16               | 1                | 0              | 1.356205                | 1.861411  | -2.946416 |
| 17               | 1                | 0              | 2.430039                | 1.215551  | -4.237008 |
| 18               | 1                | 0              | 0.679858                | 0.809807  | -4.220390 |
| 19               | 8                | 0              | -0.094989               | -0.037929 | -1.830699 |
| 20               | 8                | 0              | 1.916840                | -0.148115 | -2.832015 |
| 21               | 8                | 0              | 2.248302                | 1.392347  | 0.769563  |
| 22               | 15               | 0              | 2.816023                | -0.002613 | 0.411534  |
| 23               | 8                | 0              | 2.822687                | -0.947748 | 1.770566  |
| 24               | 6                | 0              | 3.454620                | -0.485648 | 2.975678  |
| 25               | 1                | 0              | 3.167012                | -1.183954 | 3.766685  |
| 26               | 1                | 0              | 4.543062                | -0.487548 | 2.858210  |
| 27               | 1                | 0              | 3.115053                | 0.524380  | 3.231064  |
| 28               | 8                | 0              | 4.478908                | 0.163989  | 0.256423  |
| 29               | 6                | 0              | 5.001562                | 1.220209  | -0.547034 |
| 30               | 1                | 0              | 6.091346                | 1.149425  | -0.488882 |
| 31               | 1                | 0              | 4.677209                | 2.197083  | -0.170731 |
| 32               | 1                | 0              | 4.694880                | 1.114075  | -1.596969 |
| 33               | 7                | 0              | 0.397854                | 3.340350  | -0.105685 |
| 34               | 6                | 0              | -0.757112               | 2.810764  | 0.403747  |
| 35               | 7                | 0              | -0.504835               | 1.680760  | 1.120014  |
| 36               | 16               | 0              | -2.326647               | 3.452200  | 0.167113  |
| 37               | 6                | 0              | 0.666597                | 4.514932  | -0.862062 |
| 38               | 6                | 0              | -1.418397               | 0.763659  | 1.802473  |
| 39               | 6                | 0              | -2.525553               | 0.211293  | 0.847652  |
| 40               | 6                | 0              | -3.912195               | -0.082652 | 1.461867  |
| 41               | 6                | 0              | -4.520080               | -1.331292 | 0.793345  |
| 42               | 7                | 0              | -2.067792               | -1.077954 | 0.163890  |
| 43               | 6                | 0              | -2.878590               | -1.271309 | -1.095648 |
| 44               | 6                | 0              | -4.392863               | -1.233489 | -0.756687 |
| 45               | 6                | 0              | -2.220194               | -2.282787 | 1.058905  |
| 46               | 6                | 0              | -3.724089               | -2.561560 | 1.271888  |
| 47               | 1                | 0              | 1.239785                | 2.776099  | 0.108853  |

|    |   |   |           |           |           |
|----|---|---|-----------|-----------|-----------|
| 48 | 6 | 0 | -1.922261 | 1.296946  | 3.174502  |
| 49 | 1 | 0 | -0.765980 | -0.082367 | 2.050435  |
| 50 | 1 | 0 | -4.542639 | 0.800382  | 1.320423  |
| 51 | 1 | 0 | -3.841534 | -0.252282 | 2.543231  |
| 52 | 1 | 0 | -2.572879 | -2.235696 | -1.508305 |
| 53 | 1 | 0 | -2.554888 | -0.497405 | -1.787412 |
| 54 | 6 | 0 | -5.212878 | -0.055190 | -1.319837 |
| 55 | 1 | 0 | -4.845703 | -2.149493 | -1.168143 |
| 56 | 1 | 0 | -1.681215 | -3.099214 | 0.576664  |
| 57 | 1 | 0 | -1.697707 | -2.056126 | 1.990015  |
| 58 | 1 | 0 | -3.919400 | -2.753847 | 2.332740  |
| 59 | 1 | 0 | -5.574207 | -1.432950 | 1.070987  |
| 60 | 1 | 0 | -4.034767 | -3.457439 | 0.720900  |
| 61 | 1 | 0 | 0.491914  | 1.416273  | 1.163210  |
| 62 | 1 | 0 | -1.063184 | -1.039025 | -0.127633 |
| 63 | 6 | 0 | -0.302801 | 5.423171  | -1.283693 |
| 64 | 6 | 0 | 0.069472  | 6.537150  | -2.019286 |
| 65 | 6 | 0 | 1.394911  | 6.764728  | -2.346260 |
| 66 | 6 | 0 | 2.362559  | 5.861524  | -1.926881 |
| 67 | 6 | 0 | 2.007639  | 4.747874  | -1.192951 |
| 68 | 1 | 0 | 2.761174  | 4.045952  | -0.861357 |
| 69 | 1 | 0 | 3.403695  | 6.028195  | -2.173404 |
| 70 | 1 | 0 | 1.675491  | 7.636931  | -2.920895 |
| 71 | 1 | 0 | -0.693098 | 7.236089  | -2.340122 |
| 72 | 1 | 0 | -1.332981 | 5.231410  | -1.020672 |
| 73 | 6 | 0 | -2.660602 | 2.468560  | 3.297441  |
| 74 | 6 | 0 | -3.054058 | 2.889136  | 4.557882  |
| 75 | 7 | 0 | -2.772427 | 2.230075  | 5.708234  |
| 76 | 6 | 0 | -2.048356 | 1.098578  | 5.560320  |
| 77 | 6 | 0 | -1.611342 | 0.606446  | 4.337903  |
| 78 | 1 | 0 | -1.808651 | 0.562566  | 6.474818  |
| 79 | 1 | 0 | -1.028177 | -0.304219 | 4.307414  |
| 80 | 1 | 0 | -2.895812 | 3.040512  | 2.404522  |
| 81 | 1 | 0 | -3.629659 | 3.804633  | 4.666423  |
| 82 | 1 | 0 | -2.642750 | 0.928962  | 0.037589  |
| 83 | 6 | 0 | -4.793830 | 0.960598  | -2.028655 |
| 84 | 1 | 0 | -6.265443 | -0.137686 | -1.073330 |
| 85 | 1 | 0 | -5.483316 | 1.721205  | -2.369138 |
| 86 | 1 | 0 | -3.762752 | 1.114757  | -2.314410 |

-----  
*(S)*-Ac-CAT

Standard orientation:

| Center<br>Number | Atomic<br>Number | Atomic<br>Type | Coordinates (Angstroms) |           |           |
|------------------|------------------|----------------|-------------------------|-----------|-----------|
|                  |                  |                | X                       | Y         | Z         |
| 1                | 7                | 0              | -0.311857               | 2.840481  | -0.562573 |
| 2                | 6                | 0              | -1.293980               | 1.885589  | -0.803690 |
| 3                | 7                | 0              | -1.488444               | 1.109204  | 0.300529  |
| 4                | 16               | 0              | -2.112394               | 1.773874  | -2.267959 |
| 5                | 6                | 0              | -0.009087               | 4.026707  | -1.296103 |
| 6                | 6                | 0              | -1.957974               | -0.283152 | 0.517461  |
| 7                | 6                | 0              | -1.987761               | -1.191147 | -0.735109 |
| 8                | 6                | 0              | -2.580700               | -2.602452 | -0.446954 |
| 9                | 6                | 0              | -1.770252               | -3.627834 | -1.271255 |
| 10               | 7                | 0              | -0.630884               | -1.317173 | -1.323841 |
| 11               | 6                | 0              | -0.796129               | -1.809672 | -2.705435 |
| 12               | 6                | 0              | -1.619628               | -3.144230 | -2.748212 |
| 13               | 6                | 0              | 0.213481                | -2.275425 | -0.584658 |
| 14               | 6                | 0              | -0.364001               | -3.722474 | -0.648718 |
| 15               | 1                | 0              | 0.429160                | 2.538022  | 0.065965  |

|    |   |   |           |           |           |
|----|---|---|-----------|-----------|-----------|
| 16 | 6 | 0 | -3.240791 | -0.335418 | 1.414371  |
| 17 | 1 | 0 | -1.154579 | -0.701545 | 1.119603  |
| 18 | 1 | 0 | -3.644483 | -2.627818 | -0.712237 |
| 19 | 1 | 0 | -2.510794 | -2.868134 | 0.617730  |
| 20 | 1 | 0 | 0.205819  | -1.967562 | -3.120434 |
| 21 | 1 | 0 | -1.259361 | -1.013626 | -3.290569 |
| 22 | 6 | 0 | -2.984247 | -3.125101 | -3.470543 |
| 23 | 1 | 0 | -1.019277 | -3.910757 | -3.267327 |
| 24 | 1 | 0 | 1.218896  | -2.226873 | -1.018614 |
| 25 | 1 | 0 | 0.312471  | -1.937413 | 0.452813  |
| 26 | 1 | 0 | -0.421711 | -4.169545 | 0.352846  |
| 27 | 1 | 0 | -2.264648 | -4.605826 | -1.247920 |
| 28 | 1 | 0 | 0.275877  | -4.377141 | -1.255082 |
| 29 | 1 | 0 | -1.081481 | 1.499223  | 1.143400  |
| 30 | 6 | 0 | -0.993763 | 4.790859  | -1.923082 |
| 31 | 6 | 0 | -0.645683 | 5.960430  | -2.576161 |
| 32 | 6 | 0 | 0.671465  | 6.393581  | -2.603464 |
| 33 | 6 | 0 | 1.647892  | 5.644285  | -1.966386 |
| 34 | 6 | 0 | 1.314448  | 4.468670  | -1.317874 |
| 35 | 1 | 0 | -1.416856 | 6.543901  | -3.063690 |
| 36 | 1 | 0 | 0.933734  | 7.310410  | -3.113963 |
| 37 | 1 | 0 | 2.679173  | 5.974449  | -1.975722 |
| 38 | 1 | 0 | 2.077339  | 3.884968  | -0.820476 |
| 39 | 1 | 0 | -2.021672 | 4.460485  | -1.901952 |
| 40 | 6 | 0 | -3.173564 | -0.906422 | 2.700943  |
| 41 | 6 | 0 | -4.368366 | -0.965904 | 3.483189  |
| 42 | 7 | 0 | -5.573752 | -0.507572 | 3.069487  |
| 43 | 6 | 0 | -5.611783 | 0.052467  | 1.835246  |
| 44 | 6 | 0 | -4.477540 | 0.169766  | 0.975828  |
| 45 | 6 | 0 | -1.973870 | -1.452936 | 3.318754  |
| 46 | 6 | 0 | -4.687285 | 0.814762  | -0.307412 |
| 47 | 6 | 0 | -3.593384 | -2.113294 | -4.032614 |
| 48 | 1 | 0 | -4.552218 | -2.237910 | -4.516331 |
| 49 | 1 | 0 | -3.192824 | -1.110341 | -4.052650 |
| 50 | 1 | 0 | -3.456086 | -4.102306 | -3.493337 |
| 51 | 1 | 0 | -2.591332 | -0.715473 | -1.503759 |
| 52 | 6 | 0 | -4.333510 | -1.554601 | 4.812730  |
| 53 | 6 | 0 | -3.197814 | -2.042590 | 5.326278  |
| 54 | 6 | 0 | -1.984898 | -1.984456 | 4.550037  |
| 55 | 6 | 0 | -6.902775 | 0.548489  | 1.390794  |
| 56 | 1 | 0 | -5.267791 | -1.575485 | 5.359317  |
| 57 | 1 | 0 | -3.169420 | -2.480328 | 6.315772  |
| 58 | 1 | 0 | -1.072647 | -2.379120 | 4.979601  |
| 59 | 1 | 0 | -1.039827 | -1.430939 | 2.780047  |
| 60 | 6 | 0 | -7.042205 | 1.123708  | 0.189266  |
| 61 | 6 | 0 | -5.897275 | 1.263376  | -0.675091 |
| 62 | 1 | 0 | -3.846329 | 0.963335  | -0.974823 |
| 63 | 1 | 0 | -6.027106 | 1.747025  | -1.635027 |
| 64 | 1 | 0 | -8.002961 | 1.494844  | -0.144989 |
| 65 | 1 | 0 | -7.733741 | 0.430431  | 2.073941  |

-----  
**(S)-Ac-ds-TS2**

Standard orientation:

| Center<br>Number | Atomic<br>Number | Atomic<br>Type | Coordinates (Angstroms) |          |           |
|------------------|------------------|----------------|-------------------------|----------|-----------|
|                  |                  |                | X                       | Y        | Z         |
| 1                | 7                | 0              | -0.246204               | 2.674267 | -0.228450 |
| 2                | 6                | 0              | -1.179935               | 1.700589 | -0.455374 |
| 3                | 7                | 0              | -0.937098               | 0.586427 | 0.292289  |
| 4                | 16               | 0              | -2.460734               | 1.831044 | -1.570622 |

|    |   |   |           |           |           |
|----|---|---|-----------|-----------|-----------|
| 5  | 6 | 0 | -0.063136 | 3.987610  | -0.759127 |
| 6  | 6 | 0 | -1.714438 | -0.641052 | 0.499289  |
| 7  | 6 | 0 | -1.968208 | -1.434899 | -0.804418 |
| 8  | 6 | 0 | -2.811214 | -2.718903 | -0.643264 |
| 9  | 6 | 0 | -2.247187 | -3.822268 | -1.561858 |
| 10 | 7 | 0 | -0.634038 | -1.861685 | -1.421774 |
| 11 | 6 | 0 | -0.876934 | -2.181668 | -2.874835 |
| 12 | 6 | 0 | -1.995816 | -3.253593 | -2.992546 |
| 13 | 6 | 0 | -0.009805 | -3.056271 | -0.744344 |
| 14 | 6 | 0 | -0.903240 | -4.294138 | -0.976627 |
| 15 | 1 | 0 | 0.484795  | 2.416365  | 0.442383  |
| 16 | 6 | 0 | -2.885451 | -0.520165 | 1.544567  |
| 17 | 1 | 0 | -0.991922 | -1.263416 | 1.023740  |
| 18 | 1 | 0 | -3.853395 | -2.496235 | -0.889241 |
| 19 | 1 | 0 | -2.796489 | -3.068251 | 0.398164  |
| 20 | 1 | 0 | 0.076924  | -2.530327 | -3.274731 |
| 21 | 1 | 0 | -1.114108 | -1.238244 | -3.364536 |
| 22 | 6 | 0 | -3.314170 | -2.827786 | -3.671048 |
| 23 | 1 | 0 | -1.596977 | -4.084809 | -3.595446 |
| 24 | 1 | 0 | 0.988994  | -3.155125 | -1.173527 |
| 25 | 1 | 0 | 0.123027  | -2.800944 | 0.307003  |
| 26 | 1 | 0 | -1.066100 | -4.820921 | -0.029603 |
| 27 | 1 | 0 | -2.948997 | -4.660796 | -1.618523 |
| 28 | 1 | 0 | -0.417827 | -5.003139 | -1.658094 |
| 29 | 1 | 0 | -0.030488 | 0.528934  | 0.767319  |
| 30 | 6 | 0 | -0.926567 | 4.599054  | -1.664513 |
| 31 | 6 | 0 | -0.659951 | 5.885388  | -2.107562 |
| 32 | 6 | 0 | 0.453274  | 6.575877  | -1.661720 |
| 33 | 6 | 0 | 1.313565  | 5.967482  | -0.757351 |
| 34 | 6 | 0 | 1.062266  | 4.687123  | -0.307517 |
| 35 | 1 | 0 | -1.337865 | 6.350789  | -2.812330 |
| 36 | 1 | 0 | 0.652377  | 7.579294  | -2.013042 |
| 37 | 1 | 0 | 2.188132  | 6.496557  | -0.400155 |
| 38 | 1 | 0 | 1.731102  | 4.210362  | 0.396346  |
| 39 | 1 | 0 | -1.790436 | 4.047628  | -2.005291 |
| 40 | 1 | 0 | 0.103878  | -1.103837 | -1.402166 |
| 41 | 6 | 0 | -2.535237 | -0.651988 | 2.906437  |
| 42 | 6 | 0 | -3.578030 | -0.698421 | 3.879101  |
| 43 | 7 | 0 | -4.899928 | -0.634775 | 3.578773  |
| 44 | 6 | 0 | -5.209047 | -0.446939 | 2.275345  |
| 45 | 6 | 0 | -4.242413 | -0.349011 | 1.225199  |
| 46 | 6 | 0 | -1.172933 | -0.737840 | 3.408723  |
| 47 | 6 | 0 | -4.754791 | -0.068245 | -0.105044 |
| 48 | 6 | 0 | -3.640302 | -1.655635 | -4.150385 |
| 49 | 1 | 0 | -4.603319 | -1.495142 | -4.615491 |
| 50 | 1 | 0 | -2.994491 | -0.789458 | -4.119565 |
| 51 | 1 | 0 | -4.019962 | -3.648033 | -3.743379 |
| 52 | 1 | 0 | -2.396852 | -0.783005 | -1.559159 |
| 53 | 6 | 0 | -3.248028 | -0.849486 | 5.285434  |
| 54 | 6 | 0 | -1.974067 | -0.928753 | 5.691241  |
| 55 | 6 | 0 | -0.912852 | -0.863976 | 4.719592  |
| 56 | 6 | 0 | -6.625799 | -0.356980 | 1.956843  |
| 57 | 1 | 0 | -4.077753 | -0.888350 | 5.979529  |
| 58 | 1 | 0 | -1.723817 | -1.035962 | 6.738994  |
| 59 | 1 | 0 | 0.111943  | -0.913759 | 5.065937  |
| 60 | 1 | 0 | -0.341169 | -0.676668 | 2.721672  |
| 61 | 6 | 0 | -7.040164 | -0.143767 | 0.702241  |
| 62 | 6 | 0 | -6.068922 | 0.030715  | -0.350188 |
| 63 | 1 | 0 | -4.043058 | 0.163654  | -0.883415 |
| 64 | 1 | 0 | -6.419764 | 0.268564  | -1.346532 |
| 65 | 1 | 0 | -8.093882 | -0.072669 | 0.463943  |
| 66 | 1 | 0 | -7.317597 | -0.465195 | 2.782197  |

|    |    |   |          |           |           |
|----|----|---|----------|-----------|-----------|
| 67 | 6  | 0 | 2.901611 | 0.985457  | 1.527141  |
| 68 | 6  | 0 | 2.534546 | -0.498182 | 1.343551  |
| 69 | 8  | 0 | 2.075308 | 1.879614  | 1.421740  |
| 70 | 8  | 0 | 1.303424 | -0.751243 | 1.377957  |
| 71 | 8  | 0 | 4.179627 | 1.206151  | 1.850775  |
| 72 | 6  | 0 | 4.585629 | 2.585553  | 1.958812  |
| 73 | 1  | 0 | 4.474632 | 3.079726  | 0.990135  |
| 74 | 1  | 0 | 3.983143 | 3.100807  | 2.710928  |
| 75 | 1  | 0 | 5.633421 | 2.551536  | 2.258004  |
| 76 | 6  | 0 | 3.518539 | -1.570885 | 1.756207  |
| 77 | 6  | 0 | 4.884914 | -1.574988 | 1.434844  |
| 78 | 6  | 0 | 5.716025 | -2.596370 | 1.893569  |
| 79 | 6  | 0 | 5.200464 | -3.630842 | 2.682038  |
| 80 | 6  | 0 | 3.007867 | -2.617903 | 2.540658  |
| 81 | 6  | 0 | 3.841337 | -3.638282 | 3.004083  |
| 82 | 1  | 0 | 5.294539 | -0.795258 | 0.804310  |
| 83 | 1  | 0 | 6.769843 | -2.589157 | 1.626008  |
| 84 | 1  | 0 | 5.852984 | -4.424555 | 3.038022  |
| 85 | 1  | 0 | 3.428929 | -4.434739 | 3.619216  |
| 86 | 1  | 0 | 1.952067 | -2.611772 | 2.792146  |
| 87 | 8  | 0 | 1.598717 | -0.482966 | -1.818916 |
| 88 | 15 | 0 | 2.941860 | -0.235365 | -1.114646 |
| 89 | 8  | 0 | 4.074302 | -1.307145 | -1.684394 |
| 90 | 6  | 0 | 4.349249 | -1.403342 | -3.087917 |
| 91 | 1  | 0 | 5.034074 | -2.245754 | -3.217948 |
| 92 | 1  | 0 | 4.829813 | -0.486131 | -3.448441 |
| 93 | 1  | 0 | 3.429959 | -1.585569 | -3.657164 |
| 94 | 8  | 0 | 3.544172 | 1.221343  | -1.663576 |
| 95 | 6  | 0 | 2.906795 | 1.972535  | -2.708976 |
| 96 | 1  | 0 | 3.263916 | 1.636713  | -3.690565 |
| 97 | 1  | 0 | 1.819751 | 1.865949  | -2.666520 |
| 98 | 1  | 0 | 3.187903 | 3.018990  | -2.560848 |

-----  
**(S)-Ac-ms-TS2**

Standard orientation:

| Center<br>Number | Atomic<br>Number | Atomic<br>Type | Coordinates (Angstroms) |           |           |
|------------------|------------------|----------------|-------------------------|-----------|-----------|
|                  |                  |                | X                       | Y         | Z         |
| 1                | 7                | 0              | -0.008208               | 3.385757  | -0.533676 |
| 2                | 6                | 0              | -1.073155               | 2.739542  | 0.025662  |
| 3                | 7                | 0              | -0.678681               | 1.850407  | 0.978745  |
| 4                | 16               | 0              | -2.686884               | 3.021668  | -0.482224 |
| 5                | 6                | 0              | 0.035685                | 4.397502  | -1.539367 |
| 6                | 6                | 0              | -1.359994               | 0.815604  | 1.781397  |
| 7                | 6                | 0              | -2.518505               | 0.106771  | 1.036528  |
| 8                | 6                | 0              | -3.586033               | -0.629564 | 1.868192  |
| 9                | 6                | 0              | -4.078827               | -1.858296 | 1.070086  |
| 10               | 7                | 0              | -1.947806               | -0.913864 | 0.047285  |
| 11               | 6                | 0              | -2.961283               | -1.089069 | -1.054170 |
| 12               | 6                | 0              | -4.330164               | -1.496442 | -0.429034 |
| 13               | 6                | 0              | -1.649619               | -2.249631 | 0.687346  |
| 14               | 6                | 0              | -2.968615               | -2.921880 | 1.117396  |
| 15               | 1                | 0              | 0.913194                | 2.987961  | -0.279597 |
| 16               | 6                | 0              | -1.639571               | 1.231227  | 3.266909  |
| 17               | 1                | 0              | -0.588343               | 0.053089  | 1.850605  |
| 18               | 1                | 0              | -4.404948               | 0.065917  | 2.076429  |
| 19               | 1                | 0              | -3.192005               | -0.960229 | 2.838616  |
| 20               | 1                | 0              | -2.570363               | -1.859766 | -1.723029 |
| 21               | 1                | 0              | -2.995524               | -0.148104 | -1.602420 |
| 22               | 6                | 0              | -5.511198               | -0.520164 | -0.597424 |

|    |    |   |           |           |           |
|----|----|---|-----------|-----------|-----------|
| 23 | 1  | 0 | -4.642838 | -2.432417 | -0.917398 |
| 24 | 1  | 0 | -1.092121 | -2.826601 | -0.053435 |
| 25 | 1  | 0 | -0.971210 | -2.060756 | 1.517383  |
| 26 | 1  | 0 | -2.863862 | -3.326323 | 2.130459  |
| 27 | 1  | 0 | -5.001294 | -2.250523 | 1.510140  |
| 28 | 1  | 0 | -3.214325 | -3.763388 | 0.458343  |
| 29 | 1  | 0 | 0.343107  | 1.774118  | 1.054245  |
| 30 | 1  | 0 | -1.030209 | -0.586097 | -0.359048 |
| 31 | 6  | 0 | -0.929156 | 5.395458  | -1.673675 |
| 32 | 6  | 0 | -0.784231 | 6.369817  | -2.647824 |
| 33 | 6  | 0 | 0.318551  | 6.376152  | -3.485931 |
| 34 | 6  | 0 | 1.288604  | 5.394706  | -3.343540 |
| 35 | 6  | 0 | 1.151966  | 4.412194  | -2.381083 |
| 36 | 1  | 0 | 1.909317  | 3.647410  | -2.268348 |
| 37 | 1  | 0 | 2.157904  | 5.392307  | -3.988990 |
| 38 | 1  | 0 | 0.425133  | 7.142437  | -4.241993 |
| 39 | 1  | 0 | -1.541795 | 7.137302  | -2.745313 |
| 40 | 1  | 0 | -1.789728 | 5.393021  | -1.021954 |
| 41 | 6  | 0 | -2.698341 | 2.080362  | 3.631491  |
| 42 | 6  | 0 | -2.937509 | 2.317905  | 5.018902  |
| 43 | 7  | 0 | -2.182375 | 1.798893  | 6.017560  |
| 44 | 6  | 0 | -1.129324 | 1.034142  | 5.641103  |
| 45 | 6  | 0 | -0.809938 | 0.717645  | 4.283679  |
| 46 | 6  | 0 | -0.306807 | 0.508949  | 6.718770  |
| 47 | 6  | 0 | 0.760232  | -0.258088 | 6.464264  |
| 48 | 6  | 0 | 1.103107  | -0.568407 | 5.099239  |
| 49 | 6  | 0 | 0.366820  | -0.114131 | 4.074005  |
| 50 | 6  | 0 | -3.578694 | 2.741770  | 2.686562  |
| 51 | 6  | 0 | -4.057236 | 3.152216  | 5.419989  |
| 52 | 1  | 0 | 0.681557  | -0.365886 | 3.072281  |
| 53 | 1  | 0 | 1.978475  | -1.176267 | 4.907738  |
| 54 | 1  | 0 | 1.377375  | -0.646757 | 7.264172  |
| 55 | 1  | 0 | -0.599181 | 0.773966  | 7.726769  |
| 56 | 1  | 0 | -3.011931 | 0.835173  | 0.400378  |
| 57 | 6  | 0 | -5.500866 | 0.698661  | -1.070777 |
| 58 | 1  | 0 | -6.446961 | -0.959945 | -0.271378 |
| 59 | 1  | 0 | -6.416376 | 1.270807  | -1.138328 |
| 60 | 1  | 0 | -4.610244 | 1.214712  | -1.403571 |
| 61 | 6  | 0 | -4.854612 | 3.719442  | 4.505468  |
| 62 | 6  | 0 | -4.592655 | 3.515690  | 3.102508  |
| 63 | 1  | 0 | -3.375465 | 2.662394  | 1.621293  |
| 64 | 1  | 0 | -5.225251 | 4.014322  | 2.378809  |
| 65 | 1  | 0 | -5.688128 | 4.344394  | 4.800604  |
| 66 | 1  | 0 | -4.207252 | 3.291640  | 6.482691  |
| 67 | 8  | 0 | 2.134375  | 1.945351  | 0.566156  |
| 68 | 15 | 0 | 3.002052  | 0.878919  | -0.114408 |
| 69 | 8  | 0 | 4.151967  | 0.373853  | 0.983071  |
| 70 | 6  | 0 | 4.383572  | 1.049182  | 2.229931  |
| 71 | 1  | 0 | 5.257783  | 1.705013  | 2.137525  |
| 72 | 1  | 0 | 3.512667  | 1.642019  | 2.522780  |
| 73 | 1  | 0 | 4.587415  | 0.282219  | 2.983275  |
| 74 | 8  | 0 | 3.903695  | 1.567807  | -1.309676 |
| 75 | 6  | 0 | 4.763008  | 2.685424  | -1.036823 |
| 76 | 1  | 0 | 5.105414  | 3.059007  | -2.005032 |
| 77 | 1  | 0 | 5.628019  | 2.364094  | -0.444813 |
| 78 | 1  | 0 | 4.222530  | 3.477193  | -0.506070 |
| 79 | 6  | 0 | 2.373034  | -1.174997 | -2.392178 |
| 80 | 6  | 0 | 1.981708  | -1.747058 | 0.166026  |
| 81 | 6  | 0 | 1.656512  | -0.905514 | -1.082866 |
| 82 | 8  | 0 | 0.468727  | -0.467107 | -1.134725 |
| 83 | 8  | 0 | 3.002496  | -2.601430 | 0.015161  |
| 84 | 6  | 0 | 3.416344  | -3.318871 | 1.193285  |

|    |   |   |          |           |           |
|----|---|---|----------|-----------|-----------|
| 85 | 1 | 0 | 3.754899 | -2.612909 | 1.955700  |
| 86 | 1 | 0 | 2.591412 | -3.919527 | 1.585293  |
| 87 | 1 | 0 | 4.237232 | -3.957558 | 0.865903  |
| 88 | 8 | 0 | 1.337905 | -1.655076 | 1.200243  |
| 89 | 6 | 0 | 1.591359 | -1.130495 | -3.556866 |
| 90 | 6 | 0 | 2.154212 | -1.386868 | -4.809183 |
| 91 | 6 | 0 | 3.513537 | -1.687207 | -4.917322 |
| 92 | 6 | 0 | 3.742218 | -1.462403 | -2.513646 |
| 93 | 6 | 0 | 4.304142 | -1.719342 | -3.763390 |
| 94 | 1 | 0 | 0.539713 | -0.880918 | -3.464804 |
| 95 | 1 | 0 | 1.530170 | -1.346448 | -5.698908 |
| 96 | 1 | 0 | 3.957122 | -1.883923 | -5.890489 |
| 97 | 1 | 0 | 5.367598 | -1.933632 | -3.837681 |
| 98 | 1 | 0 | 4.377389 | -1.464192 | -1.635711 |

-----  
**(S)-Ac-dr-TS2**

Standard orientation:

| Center Number | Atomic Number | Atomic Type | Coordinates (Angstroms) |           |           |
|---------------|---------------|-------------|-------------------------|-----------|-----------|
|               |               |             | X                       | Y         | Z         |
| 1             | 1             | 0           | 3.520129                | -1.533260 | -5.778857 |
| 2             | 6             | 0           | 3.023002                | 0.517197  | -3.161210 |
| 3             | 6             | 0           | 4.564738                | 0.556031  | -3.070779 |
| 4             | 6             | 0           | 5.081733                | -0.894192 | -2.865796 |
| 5             | 6             | 0           | 4.407823                | -1.749272 | -3.960501 |
| 6             | 6             | 0           | 2.600524                | -0.017441 | -4.547374 |
| 7             | 6             | 0           | 4.865800                | 0.093794  | -5.522303 |
| 8             | 6             | 0           | 5.154456                | 1.108530  | -4.387474 |
| 9             | 7             | 0           | 3.810383                | -0.855120 | -5.032287 |
| 10            | 1             | 0           | 5.740762                | -0.509634 | -5.779623 |
| 11            | 1             | 0           | 4.497309                | 0.566907  | -6.436474 |
| 12            | 1             | 0           | 6.235127                | 1.262881  | -4.293861 |
| 13            | 1             | 0           | 4.709157                | 2.083010  | -4.619711 |
| 14            | 1             | 0           | 6.170331                | -0.883589 | -3.041427 |
| 15            | 1             | 0           | 3.606797                | -2.388670 | -3.605453 |
| 16            | 1             | 0           | 2.564002                | 0.795939  | -5.276515 |
| 17            | 1             | 0           | 2.617286                | 1.514230  | -2.994930 |
| 18            | 1             | 0           | 4.871173                | 1.189733  | -2.232557 |
| 19            | 1             | 0           | 2.608794                | -0.118295 | -2.373357 |
| 20            | 7             | 0           | -0.427878               | -2.618623 | -2.039355 |
| 21            | 6             | 0           | 0.006410                | -1.442234 | -2.600922 |
| 22            | 7             | 0           | 0.928591                | -1.681595 | -3.582748 |
| 23            | 16            | 0           | -0.494611               | 0.114025  | -2.181713 |
| 24            | 6             | 0           | -1.161638               | -2.892766 | -0.850693 |
| 25            | 6             | 0           | 1.274795                | -0.842226 | -4.727033 |
| 26            | 1             | 0           | -0.187368               | -3.456716 | -2.578936 |
| 27            | 6             | 0           | -1.456905               | -4.234575 | -0.584446 |
| 28            | 6             | 0           | -2.151228               | -4.582666 | 0.556965  |
| 29            | 6             | 0           | -2.562191               | -3.606683 | 1.454328  |
| 30            | 6             | 0           | -2.270263               | -2.278919 | 1.192017  |
| 31            | 6             | 0           | -1.576089               | -1.913441 | 0.049951  |
| 32            | 1             | 0           | -2.373565               | -5.624909 | 0.749004  |
| 33            | 1             | 0           | -3.106438               | -3.881537 | 2.347558  |
| 34            | 1             | 0           | -2.588313               | -1.509245 | 1.884470  |
| 35            | 1             | 0           | -1.354917               | -0.879656 | -0.171984 |
| 36            | 1             | 0           | -1.136101               | -4.994827 | -1.283790 |
| 37            | 6             | 0           | -0.230179               | 1.215081  | -5.509511 |
| 38            | 6             | 0           | 0.048028                | -0.161938 | -5.451357 |
| 39            | 6             | 0           | -1.264439               | 1.669407  | -6.388129 |
| 40            | 7             | 0           | -2.040518               | 0.856153  | -7.139095 |

|    |    |   |           |           |           |
|----|----|---|-----------|-----------|-----------|
| 41 | 6  | 0 | -1.816440 | -0.474929 | -7.004022 |
| 42 | 6  | 0 | 0.430440  | 2.241296  | -4.723171 |
| 43 | 1  | 0 | 5.115282  | -2.397431 | -4.482396 |
| 44 | 1  | 0 | 1.311786  | -2.635351 | -3.623052 |
| 45 | 1  | 0 | 1.578354  | -1.584484 | -5.471527 |
| 46 | 6  | 0 | 4.876479  | -1.379198 | -1.417661 |
| 47 | 6  | 0 | 4.094514  | -2.339532 | -0.996632 |
| 48 | 1  | 0 | 4.037870  | -2.582590 | 0.055953  |
| 49 | 1  | 0 | 3.474015  | -2.940338 | -1.648210 |
| 50 | 1  | 0 | 5.472472  | -0.818732 | -0.706112 |
| 51 | 6  | 0 | -0.788625 | -1.031162 | -6.185957 |
| 52 | 6  | 0 | -0.683522 | -2.479057 | -6.174925 |
| 53 | 6  | 0 | -2.679265 | -1.350511 | -7.776699 |
| 54 | 6  | 0 | -2.535335 | -2.681281 | -7.726643 |
| 55 | 6  | 0 | -1.508213 | -3.254622 | -6.895966 |
| 56 | 6  | 0 | -1.527948 | 3.095006  | -6.516850 |
| 57 | 1  | 0 | 0.058597  | -2.952023 | -5.553386 |
| 58 | 1  | 0 | -1.403924 | -4.331239 | -6.859466 |
| 59 | 1  | 0 | -3.179085 | -3.337648 | -8.298276 |
| 60 | 1  | 0 | -3.437893 | -0.874461 | -8.384432 |
| 61 | 6  | 0 | -0.850482 | 3.995279  | -5.795352 |
| 62 | 6  | 0 | 0.142710  | 3.543797  | -4.852793 |
| 63 | 1  | 0 | 0.642013  | 4.276051  | -4.230857 |
| 64 | 1  | 0 | -2.301663 | 3.382435  | -7.217333 |
| 65 | 1  | 0 | -1.049227 | 5.055370  | -5.886066 |
| 66 | 1  | 0 | 1.123853  | 1.930631  | -3.966731 |
| 67 | 8  | 0 | 3.925065  | -5.336060 | -7.320949 |
| 68 | 8  | 0 | 3.105474  | -3.003392 | -6.534585 |
| 69 | 15 | 0 | 2.761667  | -4.500759 | -6.462799 |
| 70 | 6  | 0 | 5.309155  | -5.023037 | -7.150066 |
| 71 | 1  | 0 | 5.495582  | -3.962112 | -7.351793 |
| 72 | 1  | 0 | 5.857074  | -5.633736 | -7.872659 |
| 73 | 1  | 0 | 5.650945  | -5.275050 | -6.138433 |
| 74 | 8  | 0 | 1.476939  | -4.860854 | -7.423825 |
| 75 | 6  | 0 | 1.457121  | -4.456893 | -8.806208 |
| 76 | 1  | 0 | 1.630323  | -3.379404 | -8.895259 |
| 77 | 1  | 0 | 2.217878  | -5.004814 | -9.370954 |
| 78 | 1  | 0 | 0.462696  | -4.703215 | -9.185317 |
| 79 | 6  | 0 | 0.939822  | -5.670244 | -4.382879 |
| 80 | 6  | 0 | 2.392551  | -5.182886 | -4.159911 |
| 81 | 8  | 0 | -0.018385 | -5.000283 | -4.036523 |
| 82 | 8  | 0 | 2.468114  | -4.111670 | -3.490851 |
| 83 | 8  | 0 | 0.827378  | -6.882124 | -4.937630 |
| 84 | 6  | 0 | -0.511473 | -7.356932 | -5.178843 |
| 85 | 1  | 0 | -1.074137 | -7.398504 | -4.242766 |
| 86 | 1  | 0 | -1.020136 | -6.696114 | -5.884490 |
| 87 | 1  | 0 | -0.389352 | -8.354121 | -5.602578 |
| 88 | 6  | 0 | 3.480494  | -6.232651 | -3.976806 |
| 89 | 6  | 0 | 3.672388  | -7.344287 | -4.814451 |
| 90 | 6  | 0 | 4.681954  | -8.268924 | -4.544774 |
| 91 | 6  | 0 | 5.518268  | -8.105160 | -3.435264 |
| 92 | 6  | 0 | 4.327068  | -6.075215 | -2.867588 |
| 93 | 6  | 0 | 5.335773  | -7.003274 | -2.596522 |
| 94 | 1  | 0 | 3.047353  | -7.480843 | -5.687843 |
| 95 | 1  | 0 | 4.817902  | -9.119513 | -5.208507 |
| 96 | 1  | 0 | 6.302056  | -8.829895 | -3.228141 |
| 97 | 1  | 0 | 5.973181  | -6.866674 | -1.725947 |
| 98 | 1  | 0 | 4.173406  | -5.222988 | -2.215216 |

---



(S)-Ac-mr-TS2

Standard orientation:

| Center<br>Number | Atomic<br>Number | Atomic<br>Type | Coordinates (Angstroms) |           |           |
|------------------|------------------|----------------|-------------------------|-----------|-----------|
|                  |                  |                | X                       | Y         | Z         |
| 1                | 6                | 0              | 1.146773                | -0.754787 | -1.631874 |
| 2                | 6                | 0              | 1.503473                | -1.597473 | -0.389976 |
| 3                | 8                | 0              | 0.565273                | -1.725311 | 0.415751  |
| 4                | 6                | 0              | 2.648024                | -2.577070 | -0.380549 |
| 5                | 6                | 0              | 3.817485                | -2.478741 | -1.154865 |
| 6                | 6                | 0              | 2.500719                | -3.681950 | 0.476426  |
| 7                | 6                | 0              | 4.798465                | -3.467964 | -1.080071 |
| 8                | 1                | 0              | 3.976137                | -1.622659 | -1.796793 |
| 9                | 6                | 0              | 3.481919                | -4.669952 | 0.548030  |
| 10               | 1                | 0              | 1.606858                | -3.744900 | 1.087579  |
| 11               | 6                | 0              | 4.636348                | -4.568299 | -0.232959 |
| 12               | 1                | 0              | 5.700500                | -3.370614 | -1.679201 |
| 13               | 1                | 0              | 3.347140                | -5.516439 | 1.217141  |
| 14               | 1                | 0              | 5.406181                | -5.334209 | -0.177190 |
| 15               | 6                | 0              | 1.742307                | 0.165593  | -3.725988 |
| 16               | 1                | 0              | 1.487097                | 1.182838  | -3.418526 |
| 17               | 1                | 0              | 2.634431                | 0.159075  | -4.352540 |
| 18               | 1                | 0              | 0.895479                | -0.280189 | -4.253653 |
| 19               | 8                | 0              | 0.024947                | -0.278632 | -1.771802 |
| 20               | 8                | 0              | 2.087764                | -0.630609 | -2.572366 |
| 21               | 8                | 0              | 2.068919                | 1.843292  | 0.836431  |
| 22               | 15               | 0              | 2.828998                | 0.516387  | 0.596079  |
| 23               | 8                | 0              | 3.114733                | -0.222973 | 2.042425  |
| 24               | 6                | 0              | 3.709316                | 0.505736  | 3.127823  |
| 25               | 1                | 0              | 3.692099                | -0.160172 | 3.994537  |
| 26               | 1                | 0              | 4.744129                | 0.771264  | 2.886920  |
| 27               | 1                | 0              | 3.136350                | 1.413700  | 3.346298  |
| 28               | 8                | 0              | 4.427977                | 0.901055  | 0.234343  |
| 29               | 6                | 0              | 4.720231                | 1.963215  | -0.667208 |
| 30               | 1                | 0              | 5.800056                | 1.941397  | -0.841575 |
| 31               | 1                | 0              | 4.440538                | 2.931069  | -0.236448 |
| 32               | 1                | 0              | 4.203853                | 1.837019  | -1.629897 |
| 33               | 7                | 0              | 0.221182                | 3.414826  | -0.554609 |
| 34               | 6                | 0              | -0.959089               | 2.829778  | -0.184442 |
| 35               | 7                | 0              | -0.758056               | 1.851745  | 0.739561  |
| 36               | 16               | 0              | -2.485142               | 3.275787  | -0.835979 |
| 37               | 6                | 0              | 0.535684                | 4.501444  | -1.421053 |
| 38               | 6                | 0              | -1.617616               | 0.899705  | 1.470274  |
| 39               | 6                | 0              | -2.836956               | 0.379819  | 0.668900  |
| 40               | 6                | 0              | -4.018763               | -0.220059 | 1.454043  |
| 41               | 6                | 0              | -4.663508               | -1.341762 | 0.607913  |
| 42               | 7                | 0              | -2.387779               | -0.696644 | -0.330208 |
| 43               | 6                | 0              | -3.384432               | -0.703947 | -1.463491 |
| 44               | 6                | 0              | -4.816241               | -0.909340 | -0.885069 |
| 45               | 6                | 0              | -2.303184               | -2.072548 | 0.294187  |
| 46               | 6                | 0              | -3.722317               | -2.557422 | 0.648254  |
| 47               | 1                | 0              | 1.055028                | 2.986447  | -0.108428 |
| 48               | 6                | 0              | -1.909135               | 1.316742  | 2.952025  |
| 49               | 1                | 0              | -0.965826               | 0.032436  | 1.546349  |
| 50               | 1                | 0              | -4.734149               | 0.579685  | 1.668930  |
| 51               | 1                | 0              | -3.697967               | -0.632318 | 2.419883  |
| 52               | 1                | 0              | -3.092907               | -1.517581 | -2.132187 |
| 53               | 1                | 0              | -3.258021               | 0.237959  | -1.996021 |
| 54               | 6                | 0              | -5.828594               | 0.240415  | -1.055365 |
| 55               | 1                | 0              | -5.253496               | -1.774846 | -1.406753 |
| 56               | 1                | 0              | -1.787732               | -2.711621 | -0.424310 |

|    |   |   |           |           |           |
|----|---|---|-----------|-----------|-----------|
| 57 | 1 | 0 | -1.650564 | -1.988798 | 1.160122  |
| 58 | 1 | 0 | -3.716216 | -3.009594 | 1.646352  |
| 59 | 1 | 0 | -5.645521 | -1.604646 | 1.013834  |
| 60 | 1 | 0 | -4.062571 | -3.329331 | -0.052623 |
| 61 | 1 | 0 | 0.238712  | 1.713765  | 0.968423  |
| 62 | 1 | 0 | -1.442450 | -0.471127 | -0.713561 |
| 63 | 6 | 0 | -0.384833 | 5.189626  | -2.209096 |
| 64 | 6 | 0 | 0.041058  | 6.229781  | -3.020548 |
| 65 | 6 | 0 | 1.373577  | 6.599027  | -3.065414 |
| 66 | 6 | 0 | 2.293485  | 5.915762  | -2.280918 |
| 67 | 6 | 0 | 1.883856  | 4.879738  | -1.466805 |
| 68 | 1 | 0 | 2.598396  | 4.350342  | -0.851572 |
| 69 | 1 | 0 | 3.339438  | 6.194953  | -2.302967 |
| 70 | 1 | 0 | 1.696253  | 7.411474  | -3.702262 |
| 71 | 1 | 0 | -0.685767 | 6.756628  | -3.626360 |
| 72 | 1 | 0 | -1.422488 | 4.895223  | -2.162246 |
| 73 | 6 | 0 | -2.842043 | 2.313231  | 3.285987  |
| 74 | 6 | 0 | -3.119615 | 2.552603  | 4.665348  |
| 75 | 7 | 0 | -2.518657 | 1.890999  | 5.684775  |
| 76 | 6 | 0 | -1.579390 | 0.977599  | 5.340483  |
| 77 | 6 | 0 | -1.229453 | 0.653833  | 3.991912  |
| 78 | 6 | 0 | -0.919999 | 0.293811  | 6.441179  |
| 79 | 6 | 0 | 0.027622  | -0.624622 | 6.216750  |
| 80 | 6 | 0 | 0.409075  | -0.938762 | 4.862292  |
| 81 | 6 | 0 | -0.181322 | -0.341707 | 3.816189  |
| 82 | 6 | 0 | -3.554471 | 3.125370  | 2.317382  |
| 83 | 6 | 0 | -4.111600 | 3.548023  | 5.033496  |
| 84 | 1 | 0 | 0.165770  | -0.594652 | 2.825585  |
| 85 | 1 | 0 | 1.196687  | -1.663091 | 4.695544  |
| 86 | 1 | 0 | 0.523993  | -1.131512 | 7.034428  |
| 87 | 1 | 0 | -1.230615 | 0.569599  | 7.440756  |
| 88 | 1 | 0 | -3.204296 | 1.180487  | 0.035441  |
| 89 | 6 | 0 | -5.622581 | 1.446928  | -1.515203 |
| 90 | 1 | 0 | -6.825675 | -0.052439 | -0.746521 |
| 91 | 1 | 0 | -6.436936 | 2.155177  | -1.587877 |
| 92 | 1 | 0 | -4.657857 | 1.820676  | -1.830835 |
| 93 | 6 | 0 | -4.754966 | 4.257605  | 4.097085  |
| 94 | 6 | 0 | -4.453545 | 4.043364  | 2.703780  |
| 95 | 1 | 0 | -3.315649 | 3.030750  | 1.261946  |
| 96 | 1 | 0 | -4.959924 | 4.650439  | 1.963748  |
| 97 | 1 | 0 | -5.492123 | 5.002939  | 4.367929  |
| 98 | 1 | 0 | -4.296897 | 3.686331  | 6.090832  |

---

*S5 Energies of optimized structures with different R substituents.*

| Species                          | $E_{ZPE}$<br>(Hartree) | $G_c^a$<br>(Hartree) | $SCF_{PCM}^b$<br>(Hartree) | $D_c^c$<br>(Hartree) | $SCF_{PCM}+G_c+D_c$<br>(Hartree) | $\Delta G$<br>(kcal/mol) |
|----------------------------------|------------------------|----------------------|----------------------------|----------------------|----------------------------------|--------------------------|
| R=Me                             | -                      | -                    | -                          | -                    | -                                | -                        |
| Me- $\alpha$ -ketoester          | -381.61897             | 0.06560              | -381.82595                 | -0.01579             | -381.77615                       | -                        |
| Me-product                       | -1029.03854            | 0.16063              | -1029.46390                | -0.04626             | -1029.34953                      | -14.1                    |
| Me- <i>k</i> -IM0                | -1992.70021            | 0.56181              | -2006.95255                | -0.17466             | -2006.56540                      | 10.7                     |
| Me- <i>k</i> -IM1                | -2640.11504            | 0.65342              | -2654.57789                | -0.21270             | -2654.13717                      | -2.4                     |
| Me- <i>k</i> -TS1                | -2640.09559            | 0.65320              | -2654.55789                | -0.22126             | -2654.12595                      | 4.7                      |
| Me- <i>k</i> -IM2                | -2640.09661            | 0.65734              | -2654.56705                | -0.21999             | -2654.12971                      | 2.3                      |
| Me- <i>ds</i> -IM3               | -2640.12752            | 0.65604              | -2654.59825                | -0.21690             | -2654.15911                      | -16.1                    |
| Me- <i>ds</i> -TS2               | -2640.12609            | 0.66058              | -2654.59720                | -0.21782             | -2654.15444                      | -13.2                    |
| Me- <i>ds</i> -IM4               | -2640.13092            | 0.66225              | -2654.60126                | -0.21708             | -2654.15609                      | -14.2                    |
| Me- <i>ds</i> -TS3               | -2640.13346            | 0.65885              | -2654.60046                | -0.21698             | -2654.15859                      | -15.8                    |
| Me- <i>ds</i> -IM5               | -2640.13644            | 0.66088              | -2654.60777                | -0.21347             | -2654.16036                      | -16.9                    |
| Me- <i>ms</i> -TS2               | -2640.12413            | 0.66010              | -2654.59333                | -0.21696             | -2654.15019                      | 0.3                      |
| Me- <i>dr</i> -TS2               | -2640.11760            | 0.65954              | -2654.58893                | -0.21869             | -2654.14808                      | 1.6                      |
| Me- <i>mr</i> -TS2               | -2640.11854            | 0.66151              | -2654.58831                | -0.21747             | -2654.14428                      | 4.0                      |
| R=Et                             | -                      | -                    | -                          | -                    | -                                | -                        |
| Et- $\alpha$ -ketoester          | -420.90548             | 0.09176              | -421.15079                 | -0.02064             | -421.07967                       | -                        |
| Et- <i>ds</i> -TS2               | -2679.41112            | 0.68816              | -2693.92023                | -0.22541             | -2693.45748                      | -2.1                     |
| Et- <i>ms</i> -TS2               | -2679.40789            | 0.68770              | -2693.91515                | -0.22430             | -2693.45175                      | 1.5                      |
| Et- <i>dr</i> -TS2               | -2679.40316            | 0.68682              | -2693.91221                | -0.22691             | -2693.45230                      | 1.1                      |
| Et- <i>mr</i> -TS2               | -2679.40401            | 0.68769              | -2693.91129                | -0.22430             | -2693.44791                      | 3.9                      |
| R= <i>i</i> Pr                   | -                      | -                    | -                          | -                    | -                                | -                        |
| <i>i</i> Pr- $\alpha$ -ketoester | -460.19117             | 0.11891              | -460.47388                 | -0.23349             | -2732.76203                      | -                        |
| <i>i</i> Pr- <i>ds</i> -TS2      | -2718.69642            | 0.71464              | -2733.24318                | -0.23204             | -2732.75289                      | -3.4                     |
| <i>i</i> Pr- <i>ms</i> -TS2      | -2718.68996            | 0.71387              | -2733.23472                | -0.23497             | -2732.75651                      | 2.3                      |
| <i>i</i> Pr- <i>dr</i> -TS2      | -2718.68893            | 0.71410              | -2733.23563                | -0.23062             | -2732.74859                      | 0.0                      |
| <i>i</i> Pr- <i>mr</i> -TS2      | -2718.69005            | 0.71457              | -2733.23254                | -0.23349             | -2732.76203                      | 5.0                      |

- a: Thermal correction to Gibbs Free Energy.  
 b: Total electronic energies in solvent.  
 c: Dispersion effect correction energy.

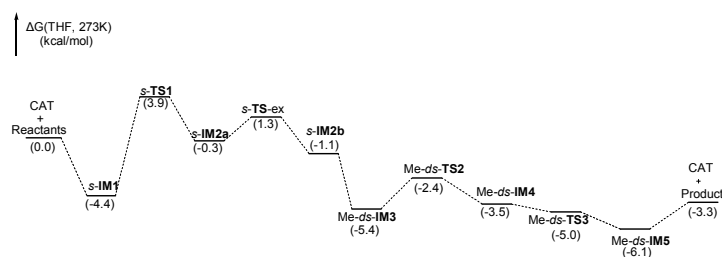

Fig S1. The energy profile of the catalytic cycle of hydrophosphonylation of methyl substituted  $\alpha$ -ketoester.

*S6: Cartesian coordinates of optimized structures with different R substituents.*

Me- $\alpha$ -ketoester

Standard orientation:

| Center Number | Atomic Number | Atomic Type | Coordinates (Angstroms) |           |           |
|---------------|---------------|-------------|-------------------------|-----------|-----------|
|               |               |             | X                       | Y         | Z         |
| 1             | 6             | 0           | -3.272123               | 0.018295  | -1.554649 |
| 2             | 6             | 0           | -2.056033               | -0.697107 | -2.211837 |
| 3             | 8             | 0           | -4.333393               | -0.807933 | -1.459871 |
| 4             | 6             | 0           | -5.519971               | -0.243031 | -0.861353 |
| 5             | 1             | 0           | -5.305314               | 0.083466  | 0.159305  |
| 6             | 1             | 0           | -5.866547               | 0.609707  | -1.450642 |
| 7             | 1             | 0           | -6.256868               | -1.045858 | -0.867007 |
| 8             | 6             | 0           | -2.220882               | -2.129228 | -2.659733 |
| 9             | 1             | 0           | -3.034071               | -2.211221 | -3.390569 |
| 10            | 1             | 0           | -1.284129               | -2.477274 | -3.100183 |
| 11            | 1             | 0           | -2.498029               | -2.766680 | -1.811904 |
| 12            | 8             | 0           | -3.256044               | 1.166108  | -1.181098 |
| 13            | 8             | 0           | -1.029584               | -0.067140 | -2.334071 |

Me-*k*-IM0

Standard orientation:

| Center Number | Atomic Number | Atomic Type | Coordinates (Angstroms) |           |           |
|---------------|---------------|-------------|-------------------------|-----------|-----------|
|               |               |             | X                       | Y         | Z         |
| 1             | 6             | 0           | -3.190501               | -0.166318 | -1.642769 |
| 2             | 6             | 0           | -2.195516               | -0.776878 | -2.670454 |
| 3             | 8             | 0           | -4.404683               | -0.713942 | -1.735026 |
| 4             | 6             | 0           | -5.411579               | -0.210385 | -0.821972 |
| 5             | 1             | 0           | -5.093255               | -0.379203 | 0.209253  |
| 6             | 1             | 0           | -5.563517               | 0.857868  | -0.992541 |
| 7             | 1             | 0           | -6.313231               | -0.776359 | -1.051894 |
| 8             | 8             | 0           | -2.874372               | 0.704292  | -0.861290 |
| 9             | 8             | 0           | -1.066728               | -0.332053 | -2.675013 |
| 10            | 7             | 0           | -0.790421               | 2.798173  | 0.227583  |
| 11            | 6             | 0           | 0.480075                | 2.848073  | -0.310818 |
| 12            | 7             | 0           | 0.625201                | 1.952218  | -1.333880 |
| 13            | 16            | 0           | 1.699190                | 3.906088  | 0.170999  |
| 14            | 6             | 0           | 1.864481                | 1.463546  | -1.957006 |
| 15            | 6             | 0           | 2.378056                | 0.201047  | -1.165926 |
| 16            | 6             | 0           | 3.665968                | -0.496122 | -1.699845 |
| 17            | 6             | 0           | 4.315671                | -1.229998 | -0.504115 |
| 18            | 7             | 0           | 2.397647                | 0.281805  | 0.310511  |
| 19            | 6             | 0           | 3.672565                | 0.784860  | 0.848378  |
| 20            | 6             | 0           | 4.859494                | -0.190400 | 0.517098  |
| 21            | 6             | 0           | 2.193839                | -1.086832 | 0.823111  |
| 22            | 6             | 0           | 3.238119                | -2.074635 | 0.210458  |
| 23            | 1             | 0           | -1.393203               | 2.069337  | -0.154041 |
| 24            | 1             | 0           | 1.502878                | 0.997650  | -2.885934 |
| 25            | 1             | 0           | 1.553639                | -0.497801 | -1.358243 |
| 26            | 1             | 0           | 4.380611                | 0.207169  | -2.138382 |
| 27            | 1             | 0           | 3.405319                | -1.211086 | -2.492213 |
| 28            | 1             | 0           | 3.551315                | 0.898027  | 1.931384  |
| 29            | 1             | 0           | 3.829818                | 1.787714  | 0.455478  |
| 30            | 6             | 0           | 6.172564                | 0.481555  | 0.059564  |

|    |   |   |           |           |           |
|----|---|---|-----------|-----------|-----------|
| 31 | 1 | 0 | 5.110462  | -0.757468 | 1.431997  |
| 32 | 1 | 0 | 2.282232  | -1.044490 | 1.915028  |
| 33 | 1 | 0 | 1.167631  | -1.401022 | 0.595502  |
| 34 | 1 | 0 | 2.762854  | -2.758576 | -0.506497 |
| 35 | 1 | 0 | 5.131400  | -1.872726 | -0.855530 |
| 36 | 1 | 0 | 3.696887  | -2.697452 | 0.989647  |
| 37 | 1 | 0 | -0.158723 | 1.329418  | -1.507907 |
| 38 | 6 | 0 | -1.457222 | 3.607832  | 1.191816  |
| 39 | 6 | 0 | -0.867155 | 4.684199  | 1.851882  |
| 40 | 6 | 0 | -2.788434 | 3.281016  | 1.475495  |
| 41 | 6 | 0 | -1.601860 | 5.412994  | 2.773103  |
| 42 | 1 | 0 | 0.162127  | 4.921170  | 1.622902  |
| 43 | 6 | 0 | -3.506758 | 4.016346  | 2.396984  |
| 44 | 1 | 0 | -3.246614 | 2.446253  | 0.963078  |
| 45 | 6 | 0 | -2.918562 | 5.088667  | 3.052742  |
| 46 | 1 | 0 | -1.132571 | 6.247764  | 3.279115  |
| 47 | 1 | 0 | -4.535682 | 3.751363  | 2.605737  |
| 48 | 1 | 0 | -3.483292 | 5.663507  | 3.773998  |
| 49 | 6 | 0 | 2.774762  | 2.613014  | -2.485871 |
| 50 | 6 | 0 | 4.064566  | 2.811347  | -2.127564 |
| 51 | 6 | 0 | 2.236098  | 3.483624  | -3.515731 |
| 52 | 6 | 0 | 4.836439  | 3.853677  | -2.727999 |
| 53 | 1 | 0 | 4.550804  | 2.211689  | -1.378362 |
| 54 | 6 | 0 | 3.071116  | 4.480301  | -4.049991 |
| 55 | 6 | 0 | 0.906148  | 3.385921  | -4.034243 |
| 56 | 7 | 0 | 4.402023  | 4.678840  | -3.651713 |
| 57 | 1 | 0 | 5.866670  | 3.981490  | -2.402357 |
| 58 | 6 | 0 | 2.577009  | 5.355742  | -5.067631 |
| 59 | 6 | 0 | 1.311156  | 5.234647  | -5.530853 |
| 60 | 6 | 0 | 0.462472  | 4.225772  | -5.000868 |
| 61 | 1 | 0 | 0.936030  | 5.895952  | -6.301305 |
| 62 | 1 | 0 | 3.252776  | 6.110591  | -5.448923 |
| 63 | 1 | 0 | -0.548292 | 4.134561  | -5.377689 |
| 64 | 1 | 0 | 0.241941  | 2.633060  | -3.638986 |
| 65 | 6 | 0 | 6.599909  | 1.662073  | 0.429132  |
| 66 | 1 | 0 | 6.790059  | -0.132146 | -0.588119 |
| 67 | 1 | 0 | 7.552415  | 2.049310  | 0.095055  |
| 68 | 1 | 0 | 6.034786  | 2.311736  | 1.082559  |
| 69 | 6 | 0 | -2.675289 | -1.866953 | -3.588917 |
| 70 | 1 | 0 | -3.519831 | -1.511963 | -4.191526 |
| 71 | 1 | 0 | -1.855825 | -2.180596 | -4.238532 |
| 72 | 1 | 0 | -3.044824 | -2.720187 | -3.007621 |

### Me-*k*-IM1

Standard orientation:

| Center Number | Atomic Number | Atomic Type | Coordinates (Angstroms) |           |           |
|---------------|---------------|-------------|-------------------------|-----------|-----------|
|               |               |             | X                       | Y         | Z         |
| 1             | 6             | 0           | -3.335221               | -0.114130 | -1.739748 |
| 2             | 6             | 0           | -2.203791               | -1.089438 | -2.152438 |
| 3             | 8             | 0           | -4.478044               | -0.753279 | -1.493644 |
| 4             | 6             | 0           | -5.583055               | 0.056440  | -1.034957 |
| 5             | 1             | 0           | -5.328481               | 0.502869  | -0.070859 |
| 6             | 1             | 0           | -5.803873               | 0.839733  | -1.763964 |
| 7             | 1             | 0           | -6.421243               | -0.632488 | -0.934904 |
| 8             | 8             | 0           | -3.184344               | 1.089607  | -1.697094 |
| 9             | 8             | 0           | -1.158688               | -0.602326 | -2.537513 |
| 10            | 7             | 0           | -1.116255               | 2.745079  | -0.218541 |
| 11            | 6             | 0           | 0.239508                | 2.547296  | -0.387033 |
| 12            | 7             | 0           | 0.505856                | 1.722716  | -1.439564 |

|    |    |   |           |           |           |
|----|----|---|-----------|-----------|-----------|
| 13 | 16 | 0 | 1.439219  | 3.209945  | 0.600643  |
| 14 | 6  | 0 | 1.794985  | 1.397849  | -2.071698 |
| 15 | 6  | 0 | 2.327270  | -0.015434 | -1.619545 |
| 16 | 6  | 0 | 3.688246  | -0.442234 | -2.251779 |
| 17 | 6  | 0 | 4.363815  | -1.436023 | -1.282197 |
| 18 | 7  | 0 | 2.278752  | -0.384564 | -0.184460 |
| 19 | 6  | 0 | 3.481342  | 0.022964  | 0.564967  |
| 20 | 6  | 0 | 4.765879  | -0.710234 | 0.033496  |
| 21 | 6  | 0 | 2.185890  | -1.861728 | -0.126222 |
| 22 | 6  | 0 | 3.346876  | -2.536617 | -0.919766 |
| 23 | 1  | 0 | -1.718785 | 2.214698  | -0.852041 |
| 24 | 1  | 0 | 1.501773  | 1.165441  | -3.105903 |
| 25 | 1  | 0 | 1.560782  | -0.666920 | -2.054568 |
| 26 | 1  | 0 | 4.351467  | 0.408507  | -2.435153 |
| 27 | 1  | 0 | 3.516077  | -0.919738 | -3.225813 |
| 28 | 1  | 0 | 3.308167  | -0.217006 | 1.620304  |
| 29 | 1  | 0 | 3.559435  | 1.107256  | 0.509013  |
| 30 | 6  | 0 | 6.025787  | 0.170759  | -0.114000 |
| 31 | 1  | 0 | 5.033456  | -1.504747 | 0.753441  |
| 32 | 1  | 0 | 2.210443  | -2.150074 | 0.930244  |
| 33 | 1  | 0 | 1.209667  | -2.168963 | -0.518744 |
| 34 | 1  | 0 | 2.973322  | -3.017439 | -1.834186 |
| 35 | 1  | 0 | 5.250915  | -1.876030 | -1.752646 |
| 36 | 1  | 0 | 3.827543  | -3.320544 | -0.320054 |
| 37 | 1  | 0 | -0.284770 | 1.250529  | -1.872101 |
| 38 | 6  | 0 | -1.855953 | 3.649717  | 0.599912  |
| 39 | 6  | 0 | -1.278053 | 4.566115  | 1.476258  |
| 40 | 6  | 0 | -3.250670 | 3.599778  | 0.488824  |
| 41 | 6  | 0 | -2.085540 | 5.408278  | 2.224111  |
| 42 | 1  | 0 | -0.200465 | 4.592895  | 1.551801  |
| 43 | 6  | 0 | -4.041358 | 4.445126  | 1.240847  |
| 44 | 1  | 0 | -3.697860 | 2.893444  | -0.196985 |
| 45 | 6  | 0 | -3.464413 | 5.355483  | 2.115698  |
| 46 | 1  | 0 | -1.623728 | 6.116278  | 2.901278  |
| 47 | 1  | 0 | -5.118623 | 4.395130  | 1.143215  |
| 48 | 1  | 0 | -4.086249 | 6.016510  | 2.703940  |
| 49 | 6  | 0 | 2.693457  | 2.660160  | -2.256758 |
| 50 | 6  | 0 | 3.916983  | 2.833244  | -1.706088 |
| 51 | 6  | 0 | 2.213874  | 3.707907  | -3.139960 |
| 52 | 6  | 0 | 4.683474  | 4.007348  | -1.983326 |
| 53 | 1  | 0 | 4.351423  | 2.110289  | -1.038017 |
| 54 | 6  | 0 | 3.037233  | 4.827610  | -3.353175 |
| 55 | 6  | 0 | 0.953891  | 3.676010  | -3.818112 |
| 56 | 7  | 0 | 4.301303  | 4.989185  | -2.766187 |
| 57 | 1  | 0 | 5.660493  | 4.105225  | -1.514916 |
| 58 | 6  | 0 | 2.601558  | 5.881687  | -4.216627 |
| 59 | 6  | 0 | 1.401456  | 5.816422  | -4.838565 |
| 60 | 6  | 0 | 0.564412  | 4.686680  | -4.632434 |
| 61 | 1  | 0 | 1.069971  | 6.613135  | -5.492004 |
| 62 | 1  | 0 | 3.266914  | 6.725139  | -4.350127 |
| 63 | 1  | 0 | -0.394046 | 4.640561  | -5.133852 |
| 64 | 1  | 0 | 0.295793  | 2.833243  | -3.673800 |
| 65 | 6  | 0 | 6.340904  | 1.187338  | 0.647761  |
| 66 | 1  | 0 | 6.707314  | -0.142427 | -0.898047 |
| 67 | 1  | 0 | 7.262703  | 1.734893  | 0.509002  |
| 68 | 1  | 0 | 5.706795  | 1.535659  | 1.450949  |
| 69 | 1  | 0 | 0.189785  | -0.388144 | 1.084521  |
| 70 | 15 | 0 | -0.986223 | -0.892571 | 1.658087  |
| 71 | 8  | 0 | -0.504240 | -2.378493 | 2.058522  |
| 72 | 6  | 0 | -1.386052 | -3.269217 | 2.770016  |
| 73 | 1  | 0 | -2.341052 | -3.368284 | 2.244342  |
| 74 | 1  | 0 | -1.552764 | -2.901635 | 3.786830  |

|    |   |   |           |           |           |
|----|---|---|-----------|-----------|-----------|
| 75 | 1 | 0 | -0.878247 | -4.234582 | 2.801985  |
| 76 | 8 | 0 | -1.134144 | -0.220293 | 3.119337  |
| 77 | 6 | 0 | -1.615073 | 1.132298  | 3.278091  |
| 78 | 1 | 0 | -2.587393 | 1.251037  | 2.791718  |
| 79 | 1 | 0 | -1.711772 | 1.289173  | 4.353534  |
| 80 | 1 | 0 | -0.893229 | 1.841630  | 2.862275  |
| 81 | 8 | 0 | -2.203978 | -0.805644 | 0.791425  |
| 82 | 6 | 0 | -2.465166 | -2.566888 | -2.077586 |
| 83 | 1 | 0 | -2.743959 | -2.831646 | -1.052410 |
| 84 | 1 | 0 | -3.309811 | -2.837130 | -2.722611 |
| 85 | 1 | 0 | -1.570353 | -3.112159 | -2.385064 |

### Me-*k*-TS1

Standard orientation:

| Center Number | Atomic Number | Atomic Type | Coordinates (Angstroms) |           |           |
|---------------|---------------|-------------|-------------------------|-----------|-----------|
|               |               |             | X                       | Y         | Z         |
| 1             | 6             | 0           | -3.044901               | 0.253301  | -1.969397 |
| 2             | 6             | 0           | -2.098648               | -0.904060 | -2.367019 |
| 3             | 8             | 0           | -4.277723               | -0.175432 | -1.711145 |
| 4             | 6             | 0           | -5.227103               | 0.810831  | -1.256886 |
| 5             | 1             | 0           | -4.904644               | 1.202605  | -0.289271 |
| 6             | 1             | 0           | -5.308422               | 1.622533  | -1.984013 |
| 7             | 1             | 0           | -6.172476               | 0.277332  | -1.160979 |
| 8             | 8             | 0           | -2.700070               | 1.421371  | -1.977553 |
| 9             | 8             | 0           | -1.004857               | -0.602526 | -2.809294 |
| 10            | 7             | 0           | -1.096492               | 3.098411  | -0.081242 |
| 11            | 6             | 0           | 0.216008                | 2.725785  | -0.244896 |
| 12            | 7             | 0           | 0.360762                | 1.837976  | -1.282127 |
| 13            | 16            | 0           | 1.499924                | 3.255521  | 0.711971  |
| 14            | 6             | 0           | 1.567862                | 1.496615  | -2.048324 |
| 15            | 6             | 0           | 2.108274                | 0.039916  | -1.737730 |
| 16            | 6             | 0           | 3.523469                | -0.289754 | -2.300399 |
| 17            | 6             | 0           | 4.208088                | -1.313711 | -1.373474 |
| 18            | 7             | 0           | 2.008605                | -0.499950 | -0.335581 |
| 19            | 6             | 0           | 3.133731                | -0.072240 | 0.540195  |
| 20            | 6             | 0           | 4.472013                | -0.699441 | 0.033533  |
| 21            | 6             | 0           | 2.009043                | -2.000915 | -0.428952 |
| 22            | 6             | 0           | 3.254027                | -2.506289 | -1.194496 |
| 23            | 1             | 0           | -1.743961               | 2.677789  | -0.749852 |
| 24            | 1             | 0           | 1.169693                | 1.312511  | -3.052234 |
| 25            | 1             | 0           | 1.384647                | -0.585170 | -2.266177 |
| 26            | 1             | 0           | 4.143770                | 0.603371  | -2.393498 |
| 27            | 1             | 0           | 3.425063                | -0.707289 | -3.310144 |
| 28            | 1             | 0           | 2.890686                | -0.393788 | 1.557770  |
| 29            | 1             | 0           | 3.139060                | 1.016375  | 0.543967  |
| 30            | 6             | 0           | 5.690953                | 0.246362  | 0.072717  |
| 31            | 1             | 0           | 4.724042                | -1.549303 | 0.691948  |
| 32            | 1             | 0           | 1.969195                | -2.373703 | 0.597191  |
| 33            | 1             | 0           | 1.073444                | -2.297353 | -0.910850 |
| 34            | 1             | 0           | 2.973083                | -2.914829 | -2.173219 |
| 35            | 1             | 0           | 5.153637                | -1.644234 | -1.817325 |
| 36            | 1             | 0           | 3.741177                | -3.314654 | -0.636264 |
| 37            | 1             | 0           | -0.498287               | 1.510532  | -1.720571 |
| 38            | 6             | 0           | -1.749591               | 3.954672  | 0.853472  |
| 39            | 6             | 0           | -1.108665               | 4.606457  | 1.904921  |
| 40            | 6             | 0           | -3.125761               | 4.137912  | 0.674935  |
| 41            | 6             | 0           | -1.838776               | 5.420650  | 2.756398  |
| 42            | 1             | 0           | -0.045810               | 4.460109  | 2.029531  |
| 43            | 6             | 0           | -3.839292               | 4.952129  | 1.531188  |

|    |    |   |           |           |           |
|----|----|---|-----------|-----------|-----------|
| 44 | 1  | 0 | -3.623475 | 3.635237  | -0.143017 |
| 45 | 6  | 0 | -3.199961 | 5.599689  | 2.579376  |
| 46 | 1  | 0 | -1.329740 | 5.921612  | 3.570606  |
| 47 | 1  | 0 | -4.903298 | 5.083903  | 1.379589  |
| 48 | 1  | 0 | -3.760373 | 6.237615  | 3.249249  |
| 49 | 6  | 0 | 2.505499  | 2.722886  | -2.266745 |
| 50 | 6  | 0 | 3.705296  | 2.903885  | -1.667590 |
| 51 | 6  | 0 | 2.067570  | 3.745351  | -3.197239 |
| 52 | 6  | 0 | 4.506832  | 4.047422  | -1.971439 |
| 53 | 1  | 0 | 4.093501  | 2.209634  | -0.941369 |
| 54 | 6  | 0 | 2.924206  | 4.835363  | -3.435356 |
| 55 | 6  | 0 | 0.812719  | 3.727760  | -3.886220 |
| 56 | 7  | 0 | 4.174300  | 4.992974  | -2.819219 |
| 57 | 1  | 0 | 5.467552  | 4.150243  | -1.471819 |
| 58 | 6  | 0 | 2.535336  | 5.864755  | -4.349595 |
| 59 | 6  | 0 | 1.343025  | 5.809735  | -4.987179 |
| 60 | 6  | 0 | 0.466069  | 4.717688  | -4.744080 |
| 61 | 1  | 0 | 1.045222  | 6.588591  | -5.677411 |
| 62 | 1  | 0 | 3.227541  | 6.682588  | -4.504692 |
| 63 | 1  | 0 | -0.490027 | 4.684642  | -5.251298 |
| 64 | 1  | 0 | 0.119403  | 2.918640  | -3.713525 |
| 65 | 6  | 0 | 5.869101  | 1.232998  | 0.913745  |
| 66 | 1  | 0 | 6.467099  | 0.001726  | -0.644136 |
| 67 | 1  | 0 | 6.773572  | 1.825602  | 0.903055  |
| 68 | 1  | 0 | 5.136448  | 1.512292  | 1.658430  |
| 69 | 1  | 0 | 0.845307  | -0.338220 | 0.252844  |
| 70 | 15 | 0 | -0.693218 | -0.612521 | 1.059513  |
| 71 | 8  | 0 | -0.454199 | -2.143543 | 1.694443  |
| 72 | 6  | 0 | -1.470563 | -2.768966 | 2.485167  |
| 73 | 1  | 0 | -2.447872 | -2.703045 | 1.993146  |
| 74 | 1  | 0 | -1.526675 | -2.303220 | 3.476985  |
| 75 | 1  | 0 | -1.189245 | -3.819827 | 2.599828  |
| 76 | 8  | 0 | -0.779912 | 0.326107  | 2.421821  |
| 77 | 6  | 0 | -2.011235 | 0.810065  | 2.965701  |
| 78 | 1  | 0 | -2.772878 | 0.907033  | 2.185680  |
| 79 | 1  | 0 | -2.376067 | 0.128658  | 3.745113  |
| 80 | 1  | 0 | -1.803060 | 1.787287  | 3.410335  |
| 81 | 8  | 0 | -2.034629 | -0.571982 | 0.325246  |
| 82 | 6  | 0 | -2.602559 | -2.314898 | -2.250423 |
| 83 | 1  | 0 | -2.914655 | -2.500972 | -1.218861 |
| 84 | 1  | 0 | -3.479173 | -2.456578 | -2.894510 |
| 85 | 1  | 0 | -1.812189 | -3.009044 | -2.544822 |

## Me-*k*-IM2

Standard orientation:

| Center Number | Atomic Number | Atomic Type | Coordinates (Angstroms) |           |           |
|---------------|---------------|-------------|-------------------------|-----------|-----------|
|               |               |             | X                       | Y         | Z         |
| 1             | 6             | 0           | -2.914046               | 0.346458  | -1.980213 |
| 2             | 6             | 0           | -2.042421               | -0.902318 | -2.205673 |
| 3             | 8             | 0           | -4.211329               | 0.051930  | -1.919236 |
| 4             | 6             | 0           | -5.115257               | 1.139987  | -1.649607 |
| 5             | 1             | 0           | -4.938900               | 1.515429  | -0.638476 |
| 6             | 1             | 0           | -4.976051               | 1.942597  | -2.378164 |
| 7             | 1             | 0           | -6.114293               | 0.711282  | -1.728711 |
| 8             | 8             | 0           | -2.465897               | 1.484491  | -1.985239 |
| 9             | 8             | 0           | -0.875419               | -0.722417 | -2.526474 |
| 10            | 7             | 0           | -0.962997               | 3.216711  | -0.054784 |
| 11            | 6             | 0           | 0.338112                | 2.883272  | -0.313587 |
| 12            | 7             | 0           | 0.437327                | 2.018363  | -1.375904 |



|    |    |   |           |           |           |
|----|----|---|-----------|-----------|-----------|
| 13 | 16 | 0 | 1.678415  | 3.434662  | 0.556473  |
| 14 | 6  | 0 | 1.619968  | 1.637947  | -2.152894 |
| 15 | 6  | 0 | 2.118091  | 0.186320  | -1.775971 |
| 16 | 6  | 0 | 3.501008  | -0.274843 | -2.301038 |
| 17 | 6  | 0 | 4.100386  | -1.296999 | -1.312919 |
| 18 | 7  | 0 | 2.013185  | -0.235423 | -0.315973 |
| 19 | 6  | 0 | 3.192983  | 0.168563  | 0.524819  |
| 20 | 6  | 0 | 4.450468  | -0.609786 | 0.039794  |
| 21 | 6  | 0 | 1.864465  | -1.745999 | -0.279671 |
| 22 | 6  | 0 | 3.048947  | -2.386208 | -1.034368 |
| 23 | 1  | 0 | -1.643494 | 2.779078  | -0.679479 |
| 24 | 1  | 0 | 1.201971  | 1.419056  | -3.143006 |
| 25 | 1  | 0 | 1.352388  | -0.443775 | -2.228705 |
| 26 | 1  | 0 | 4.188866  | 0.561096  | -2.438278 |
| 27 | 1  | 0 | 3.367786  | -0.737092 | -3.286063 |
| 28 | 1  | 0 | 2.928405  | -0.056973 | 1.560561  |
| 29 | 1  | 0 | 3.277066  | 1.249412  | 0.438321  |
| 30 | 6  | 0 | 5.742185  | 0.231844  | -0.019053 |
| 31 | 1  | 0 | 4.644067  | -1.426780 | 0.755487  |
| 32 | 1  | 0 | 1.811842  | -2.022620 | 0.774417  |
| 33 | 1  | 0 | 0.895490  | -1.977675 | -0.721138 |
| 34 | 1  | 0 | 2.708764  | -2.831706 | -1.976651 |
| 35 | 1  | 0 | 5.002648  | -1.743861 | -1.743132 |
| 36 | 1  | 0 | 3.480266  | -3.194582 | -0.433535 |
| 37 | 1  | 0 | -0.439957 | 1.650058  | -1.747970 |
| 38 | 6  | 0 | -1.577483 | 3.986682  | 0.980459  |
| 39 | 6  | 0 | -0.881941 | 4.633588  | 1.998588  |
| 40 | 6  | 0 | -2.972120 | 4.089287  | 0.932559  |
| 41 | 6  | 0 | -1.577939 | 5.363292  | 2.949868  |
| 42 | 1  | 0 | 0.194238  | 4.549915  | 2.024137  |
| 43 | 6  | 0 | -3.651278 | 4.820374  | 1.886194  |
| 44 | 1  | 0 | -3.512137 | 3.587710  | 0.141262  |
| 45 | 6  | 0 | -2.957491 | 5.462991  | 2.902594  |
| 46 | 1  | 0 | -1.027042 | 5.860575  | 3.738588  |
| 47 | 1  | 0 | -4.730700 | 4.889461  | 1.837020  |
| 48 | 1  | 0 | -3.491063 | 6.035236  | 3.649447  |
| 49 | 6  | 0 | 2.588717  | 2.825414  | -2.431039 |
| 50 | 6  | 0 | 3.826533  | 2.966241  | -1.903009 |
| 51 | 6  | 0 | 2.137726  | 3.847517  | -3.354712 |
| 52 | 6  | 0 | 4.651995  | 4.073798  | -2.269821 |
| 53 | 1  | 0 | 4.229320  | 2.270883  | -1.186052 |
| 54 | 6  | 0 | 3.019736  | 4.900556  | -3.657348 |
| 55 | 6  | 0 | 0.847888  | 3.862983  | -3.974906 |
| 56 | 7  | 0 | 4.307142  | 5.018724  | -3.113043 |
| 57 | 1  | 0 | 5.642422  | 4.147032  | -1.826255 |
| 58 | 6  | 0 | 2.619087  | 5.929594  | -4.566611 |
| 59 | 6  | 0 | 1.392333  | 5.907790  | -5.137839 |
| 60 | 6  | 0 | 0.491311  | 4.852056  | -4.829912 |
| 61 | 1  | 0 | 1.085190  | 6.686591  | -5.824184 |
| 62 | 1  | 0 | 3.330481  | 6.719194  | -4.772787 |
| 63 | 1  | 0 | -0.491418 | 4.846384  | -5.284754 |
| 64 | 1  | 0 | 0.136908  | 3.082625  | -3.749487 |
| 65 | 6  | 0 | 6.007425  | 1.287698  | 0.706813  |
| 66 | 1  | 0 | 6.488671  | -0.158265 | -0.701586 |
| 67 | 1  | 0 | 6.959172  | 1.795769  | 0.630291  |
| 68 | 1  | 0 | 5.308717  | 1.710559  | 1.415980  |
| 69 | 1  | 0 | 1.116719  | 0.126452  | 0.103283  |
| 70 | 15 | 0 | -1.045638 | -0.444087 | 1.066077  |
| 71 | 8  | 0 | -0.683693 | -1.995504 | 1.679803  |
| 72 | 6  | 0 | -1.700740 | -2.838252 | 2.221549  |
| 73 | 1  | 0 | -2.623972 | -2.769866 | 1.633736  |
| 74 | 1  | 0 | -1.912237 | -2.568148 | 3.264850  |

|    |   |   |           |           |           |
|----|---|---|-----------|-----------|-----------|
| 75 | 1 | 0 | -1.328961 | -3.868771 | 2.194173  |
| 76 | 8 | 0 | -1.500893 | 0.377153  | 2.463098  |
| 77 | 6 | 0 | -2.847434 | 0.424348  | 2.934184  |
| 78 | 1 | 0 | -3.558495 | 0.357848  | 2.103340  |
| 79 | 1 | 0 | -3.041777 | -0.396640 | 3.637975  |
| 80 | 1 | 0 | -2.975492 | 1.376747  | 3.459806  |
| 81 | 8 | 0 | -2.346311 | -0.615356 | 0.229437  |
| 82 | 6 | 0 | -2.700989 | -2.254769 | -2.187584 |
| 83 | 1 | 0 | -3.333438 | -2.359009 | -1.305041 |
| 84 | 1 | 0 | -3.332221 | -2.361157 | -3.080623 |
| 85 | 1 | 0 | -1.930233 | -3.029161 | -2.202471 |

### Me-*ds*-IM3

Standard orientation:

| Center Number | Atomic Number | Atomic Type | Coordinates (Angstroms) |           |           |
|---------------|---------------|-------------|-------------------------|-----------|-----------|
|               |               |             | X                       | Y         | Z         |
| 1             | 7             | 0           | -0.389077               | 2.883309  | -0.207318 |
| 2             | 6             | 0           | -1.265279               | 1.850952  | -0.401303 |
| 3             | 7             | 0           | -0.891998               | 0.726128  | 0.283349  |
| 4             | 16            | 0           | -2.649793               | 1.907952  | -1.381883 |
| 5             | 6             | 0           | -0.326174               | 4.209394  | -0.731348 |
| 6             | 6             | 0           | -1.653370               | -0.509579 | 0.488932  |
| 7             | 6             | 0           | -1.830438               | -1.328520 | -0.809239 |
| 8             | 6             | 0           | -2.582487               | -2.669473 | -0.623582 |
| 9             | 6             | 0           | -1.932537               | -3.754295 | -1.505200 |
| 10            | 7             | 0           | -0.487071               | -1.658362 | -1.444835 |
| 11            | 6             | 0           | -0.725406               | -2.042141 | -2.882459 |
| 12            | 6             | 0           | -1.740973               | -3.215717 | -2.955587 |
| 13            | 6             | 0           | 0.239428                | -2.776316 | -0.740810 |
| 14            | 6             | 0           | -0.550389               | -4.091721 | -0.917140 |
| 15            | 1             | 0           | 0.393115                | 2.665722  | 0.415233  |
| 16            | 6             | 0           | -2.969320               | -0.263519 | 1.284324  |
| 17            | 1             | 0           | -1.000577               | -1.099169 | 1.136241  |
| 18            | 1             | 0           | -3.634843               | -2.538786 | -0.890272 |
| 19            | 1             | 0           | -2.557944               | -2.987562 | 0.427907  |
| 20            | 1             | 0           | 0.250377                | -2.309936 | -3.291589 |
| 21            | 1             | 0           | -1.056217               | -1.138270 | -3.392246 |
| 22            | 6             | 0           | -3.097079               | -2.935770 | -3.635940 |
| 23            | 1             | 0           | -1.272425               | -4.027669 | -3.534141 |
| 24            | 1             | 0           | 1.237541                | -2.809731 | -1.181934 |
| 25            | 1             | 0           | 0.358107                | -2.480599 | 0.302513  |
| 26            | 1             | 0           | -0.662881               | -4.594477 | 0.050175  |
| 27            | 1             | 0           | -2.562894               | -4.649535 | -1.525620 |
| 28            | 1             | 0           | -0.013323               | -4.783162 | -1.577606 |
| 29            | 1             | 0           | -0.030043               | 0.765405  | 0.826864  |
| 30            | 6             | 0           | -1.270266               | 4.757510  | -1.595974 |
| 31            | 6             | 0           | -1.117979               | 6.060961  | -2.042511 |
| 32            | 6             | 0           | -0.040067               | 6.830385  | -1.640591 |
| 33            | 6             | 0           | 0.900859                | 6.284719  | -0.777622 |
| 34            | 6             | 0           | 0.763439                | 4.988127  | -0.324794 |
| 35            | 1             | 0           | -1.857630               | 6.477106  | -2.715305 |
| 36            | 1             | 0           | 0.069644                | 7.846547  | -1.994500 |
| 37            | 1             | 0           | 1.749330                | 6.875356  | -0.455694 |
| 38            | 1             | 0           | 1.496383                | 4.561166  | 0.346378  |
| 39            | 1             | 0           | -2.105788               | 4.144615  | -1.901058 |
| 40            | 1             | 0           | 0.211579                | -0.842783 | -1.475264 |
| 41            | 6             | 0           | -2.901854               | -0.059550 | 2.714820  |
| 42            | 6             | 0           | -4.106400               | 0.167952  | 3.403998  |
| 43            | 7             | 0           | -5.362184               | 0.214840  | 2.780030  |

|    |    |   |           |           |           |
|----|----|---|-----------|-----------|-----------|
| 44 | 6  | 0 | -5.356210 | 0.038671  | 1.478637  |
| 45 | 6  | 0 | -4.185229 | -0.201557 | 0.693896  |
| 46 | 6  | 0 | -1.688618 | -0.068793 | 3.473869  |
| 47 | 1  | 0 | -4.306125 | -0.316293 | -0.372594 |
| 48 | 6  | 0 | -3.538081 | -1.811822 | -4.138247 |
| 49 | 1  | 0 | -4.513974 | -1.755561 | -4.600784 |
| 50 | 1  | 0 | -2.978543 | -0.887205 | -4.130877 |
| 51 | 1  | 0 | -3.720563 | -3.821852 | -3.685657 |
| 52 | 1  | 0 | -2.332456 | -0.700322 | -1.543856 |
| 53 | 6  | 0 | -4.089847 | 0.370497  | 4.819940  |
| 54 | 6  | 0 | -2.923416 | 0.351655  | 5.506290  |
| 55 | 6  | 0 | -1.701267 | 0.129092  | 4.814416  |
| 56 | 1  | 0 | -6.318599 | 0.078716  | 0.973127  |
| 57 | 1  | 0 | -5.038630 | 0.540413  | 5.312901  |
| 58 | 1  | 0 | -2.907359 | 0.506725  | 6.577530  |
| 59 | 1  | 0 | -0.773371 | 0.121040  | 5.372493  |
| 60 | 1  | 0 | -0.744834 | -0.229017 | 2.972868  |
| 61 | 6  | 0 | 2.747551  | 1.185834  | 1.675301  |
| 62 | 6  | 0 | 2.484067  | -0.325893 | 1.755135  |
| 63 | 8  | 0 | 1.857156  | 2.009124  | 1.522656  |
| 64 | 8  | 0 | 1.312149  | -0.694353 | 1.808582  |
| 65 | 8  | 0 | 4.028347  | 1.496290  | 1.893394  |
| 66 | 6  | 0 | 4.395440  | 2.880520  | 1.711615  |
| 67 | 1  | 0 | 4.241136  | 3.155578  | 0.665071  |
| 68 | 1  | 0 | 3.799258  | 3.520637  | 2.366430  |
| 69 | 1  | 0 | 5.452217  | 2.932516  | 1.973298  |
| 70 | 8  | 0 | 1.588894  | -0.138729 | -1.894812 |
| 71 | 15 | 0 | 2.903240  | 0.075633  | -1.096768 |
| 72 | 8  | 0 | 4.012177  | -1.066243 | -1.640459 |
| 73 | 6  | 0 | 4.322143  | -1.194628 | -3.030757 |
| 74 | 1  | 0 | 4.905843  | -2.112842 | -3.148887 |
| 75 | 1  | 0 | 4.923173  | -0.342443 | -3.371376 |
| 76 | 1  | 0 | 3.409763  | -1.261701 | -3.636610 |
| 77 | 8  | 0 | 3.570834  | 1.505107  | -1.688125 |
| 78 | 6  | 0 | 3.067836  | 2.166881  | -2.855088 |
| 79 | 1  | 0 | 3.567216  | 1.790611  | -3.757753 |
| 80 | 1  | 0 | 1.988405  | 2.020449  | -2.955611 |
| 81 | 1  | 0 | 3.292562  | 3.232279  | -2.742294 |
| 82 | 6  | 0 | 3.643136  | -1.259635 | 2.008345  |
| 83 | 1  | 0 | 4.537603  | -0.974348 | 1.454316  |
| 84 | 1  | 0 | 3.879027  | -1.228985 | 3.082358  |
| 85 | 1  | 0 | 3.347601  | -2.278889 | 1.748768  |

## Me- *ds*-TS2

Standard orientation:

| Center Number | Atomic Number | Atomic Type | Coordinates (Angstroms) |           |           |
|---------------|---------------|-------------|-------------------------|-----------|-----------|
|               |               |             | X                       | Y         | Z         |
| 1             | 7             | 0           | -0.307164               | 2.646885  | -0.138879 |
| 2             | 6             | 0           | -1.246914               | 1.674744  | -0.351407 |
| 3             | 7             | 0           | -0.917376               | 0.503136  | 0.267731  |
| 4             | 16            | 0           | -2.655720               | 1.850526  | -1.286095 |
| 5             | 6             | 0           | -0.186366               | 3.990292  | -0.605293 |
| 6             | 6             | 0           | -1.740229               | -0.693320 | 0.450614  |
| 7             | 6             | 0           | -1.972959               | -1.457548 | -0.870808 |
| 8             | 6             | 0           | -2.792437               | -2.763461 | -0.738494 |
| 9             | 6             | 0           | -2.188601               | -3.849225 | -1.651641 |
| 10            | 7             | 0           | -0.641950               | -1.835167 | -1.511913 |
| 11            | 6             | 0           | -0.886727               | -2.152161 | -2.964716 |
| 12            | 6             | 0           | -1.955770               | -3.274018 | -3.082599 |

|    |    |   |           |           |           |
|----|----|---|-----------|-----------|-----------|
| 13 | 6  | 0 | 0.027209  | -3.012309 | -0.844860 |
| 14 | 6  | 0 | -0.832073 | -4.276287 | -1.062715 |
| 15 | 1  | 0 | 0.469188  | 2.366573  | 0.469894  |
| 16 | 6  | 0 | -3.021828 | -0.408476 | 1.283735  |
| 17 | 1  | 0 | -1.105610 | -1.336402 | 1.065552  |
| 18 | 1  | 0 | -3.834014 | -2.570163 | -1.009234 |
| 19 | 1  | 0 | -2.793659 | -3.118089 | 0.301346  |
| 20 | 1  | 0 | 0.078230  | -2.449604 | -3.379034 |
| 21 | 1  | 0 | -1.174642 | -1.216285 | -3.441714 |
| 22 | 6  | 0 | -3.289501 | -2.908551 | -3.766337 |
| 23 | 1  | 0 | -1.519152 | -4.088527 | -3.681981 |
| 24 | 1  | 0 | 1.019519  | -3.081200 | -1.293998 |
| 25 | 1  | 0 | 0.169941  | -2.749450 | 0.203790  |
| 26 | 1  | 0 | -0.980738 | -4.797572 | -0.110278 |
| 27 | 1  | 0 | -2.862734 | -4.710244 | -1.708171 |
| 28 | 1  | 0 | -0.327927 | -4.978843 | -1.737261 |
| 29 | 1  | 0 | -0.007808 | 0.421105  | 0.735450  |
| 30 | 6  | 0 | -1.111263 | 4.618719  | -1.435471 |
| 31 | 6  | 0 | -0.900476 | 5.930652  | -1.830365 |
| 32 | 6  | 0 | 0.217669  | 6.629787  | -1.410663 |
| 33 | 6  | 0 | 1.139568  | 6.003977  | -0.582121 |
| 34 | 6  | 0 | 0.944379  | 4.697920  | -0.180694 |
| 35 | 1  | 0 | -1.626012 | 6.409615  | -2.476186 |
| 36 | 1  | 0 | 0.373002  | 7.653332  | -1.723846 |
| 37 | 1  | 0 | 2.018754  | 6.539567  | -0.246590 |
| 38 | 1  | 0 | 1.661516  | 4.207380  | 0.463688  |
| 39 | 1  | 0 | -1.979853 | 4.060322  | -1.752862 |
| 40 | 1  | 0 | 0.077058  | -1.059016 | -1.491012 |
| 41 | 6  | 0 | -2.900789 | -0.234864 | 2.714442  |
| 42 | 6  | 0 | -4.073389 | 0.022373  | 3.446457  |
| 43 | 7  | 0 | -5.345575 | 0.127952  | 2.863901  |
| 44 | 6  | 0 | -5.387216 | -0.020610 | 1.559689  |
| 45 | 6  | 0 | -4.251646 | -0.288404 | 0.732889  |
| 46 | 6  | 0 | -1.663726 | -0.301925 | 3.431338  |
| 47 | 1  | 0 | -4.409617 | -0.376889 | -0.331314 |
| 48 | 6  | 0 | -3.675501 | -1.747593 | -4.228094 |
| 49 | 1  | 0 | -4.642519 | -1.630930 | -4.697964 |
| 50 | 1  | 0 | -3.077188 | -0.848895 | -4.178319 |
| 51 | 1  | 0 | -3.949848 | -3.764057 | -3.857271 |
| 52 | 1  | 0 | -2.436895 | -0.775556 | -1.583106 |
| 53 | 6  | 0 | -4.003610 | 0.194987  | 4.864710  |
| 54 | 6  | 0 | -2.816720 | 0.120260  | 5.511076  |
| 55 | 6  | 0 | -1.626028 | -0.130699 | 4.775119  |
| 56 | 1  | 0 | -6.362869 | 0.066218  | 1.086517  |
| 57 | 1  | 0 | -4.928828 | 0.388793  | 5.392355  |
| 58 | 1  | 0 | -2.760299 | 0.252769  | 6.584000  |
| 59 | 1  | 0 | -0.681263 | -0.181560 | 5.301745  |
| 60 | 1  | 0 | -0.742504 | -0.481806 | 2.895187  |
| 61 | 6  | 0 | 2.877028  | 0.949372  | 1.512306  |
| 62 | 6  | 0 | 2.506767  | -0.525062 | 1.315473  |
| 63 | 8  | 0 | 2.069004  | 1.864228  | 1.442518  |
| 64 | 8  | 0 | 1.289260  | -0.816238 | 1.401343  |
| 65 | 8  | 0 | 4.171912  | 1.132847  | 1.804719  |
| 66 | 6  | 0 | 4.622404  | 2.499235  | 1.893737  |
| 67 | 1  | 0 | 4.497658  | 2.990636  | 0.925330  |
| 68 | 1  | 0 | 4.058237  | 3.037006  | 2.659803  |
| 69 | 1  | 0 | 5.677460  | 2.436094  | 2.160947  |
| 70 | 8  | 0 | 1.600641  | -0.466593 | -1.900375 |
| 71 | 15 | 0 | 2.907820  | -0.221747 | -1.127316 |
| 72 | 8  | 0 | 4.057810  | -1.322891 | -1.609392 |
| 73 | 6  | 0 | 4.433576  | -1.432180 | -2.988796 |
| 74 | 1  | 0 | 5.113564  | -2.285043 | -3.065116 |

|    |   |   |          |           |           |
|----|---|---|----------|-----------|-----------|
| 75 | 1 | 0 | 4.952169 | -0.523943 | -3.317025 |
| 76 | 1 | 0 | 3.555756 | -1.604645 | -3.623020 |
| 77 | 8 | 0 | 3.566022 | 1.207798  | -1.685401 |
| 78 | 6 | 0 | 2.948709 | 1.973351  | -2.731514 |
| 79 | 1 | 0 | 3.171868 | 1.538576  | -3.713407 |
| 80 | 1 | 0 | 1.863936 | 2.021861  | -2.602381 |
| 81 | 1 | 0 | 3.377924 | 2.977544  | -2.674354 |
| 82 | 6 | 0 | 3.565337 | -1.569603 | 1.632111  |
| 83 | 1 | 0 | 4.555646 | -1.305498 | 1.260435  |
| 84 | 1 | 0 | 3.614951 | -1.678863 | 2.725068  |
| 85 | 1 | 0 | 3.260096 | -2.529491 | 1.208079  |

### Me-*ds*-IM4

Standard orientation:

| Center Number | Atomic Number | Atomic Type | Coordinates (Angstroms) |           |           |
|---------------|---------------|-------------|-------------------------|-----------|-----------|
|               |               |             | X                       | Y         | Z         |
| 1             | 7             | 0           | -0.434676               | 2.927107  | -0.179869 |
| 2             | 6             | 0           | -1.354579               | 1.930704  | 0.061779  |
| 3             | 7             | 0           | -0.773861               | 0.694513  | 0.093108  |
| 4             | 16            | 0           | -3.014334               | 2.194119  | 0.241141  |
| 5             | 6             | 0           | -0.579020               | 4.341250  | -0.078477 |
| 6             | 6             | 0           | -1.465082               | -0.595423 | -0.048906 |
| 7             | 6             | 0           | -2.042472               | -0.706248 | -1.491550 |
| 8             | 6             | 0           | -3.123683               | -1.756621 | -1.833153 |
| 9             | 6             | 0           | -2.890808               | -2.278505 | -3.268605 |
| 10            | 7             | 0           | -0.873253               | -0.961903 | -2.450592 |
| 11            | 6             | 0           | -1.249297               | -0.456014 | -3.815500 |
| 12            | 6             | 0           | -2.603708               | -1.092925 | -4.242276 |
| 13            | 6             | 0           | -0.518793               | -2.426835 | -2.538814 |
| 14            | 6             | 0           | -1.656142               | -3.193108 | -3.242822 |
| 15            | 1             | 0           | 0.422517                | 2.630068  | -0.658429 |
| 16            | 6             | 0           | -2.367933               | -0.936429 | 1.167723  |
| 17            | 1             | 0           | -0.642312               | -1.315805 | -0.007745 |
| 18            | 1             | 0           | -4.108426               | -1.289397 | -1.754247 |
| 19            | 1             | 0           | -3.108678               | -2.598074 | -1.128104 |
| 20            | 1             | 0           | -0.425884               | -0.724485 | -4.480271 |
| 21            | 1             | 0           | -1.283658               | 0.631481  | -3.749898 |
| 22            | 6             | 0           | -3.824162               | -0.156599 | -4.363672 |
| 23            | 1             | 0           | -2.459514               | -1.537226 | -5.240292 |
| 24            | 1             | 0           | 0.427534                | -2.472859 | -3.075613 |
| 25            | 1             | 0           | -0.341727               | -2.774799 | -1.519702 |
| 26            | 1             | 0           | -1.876867               | -4.120293 | -2.701115 |
| 27            | 1             | 0           | -3.770938               | -2.831226 | -3.613749 |
| 28            | 1             | 0           | -1.363793               | -3.475136 | -4.261596 |
| 29            | 1             | 0           | 0.215336                | 0.624932  | -0.195347 |
| 30            | 6             | 0           | -1.483019               | 4.957504  | 0.787091  |
| 31            | 6             | 0           | -1.533362               | 6.339328  | 0.862850  |
| 32            | 6             | 0           | -0.686765               | 7.124563  | 0.097190  |
| 33            | 6             | 0           | 0.223045                | 6.513533  | -0.752675 |
| 34            | 6             | 0           | 0.279832                | 5.135689  | -0.843626 |
| 35            | 1             | 0           | -2.242143               | 6.805949  | 1.535602  |
| 36            | 1             | 0           | -0.732046               | 8.203081  | 0.164319  |
| 37            | 1             | 0           | 0.894085                | 7.115929  | -1.352115 |
| 38            | 1             | 0           | 0.990801                | 4.654922  | -1.501723 |
| 39            | 1             | 0           | -2.146676               | 4.349362  | 1.382943  |
| 40            | 1             | 0           | 0.044896                | -0.484864 | -2.112154 |
| 41            | 6             | 0           | -1.728603               | -1.336660 | 2.402784  |
| 42            | 6             | 0           | -2.551017               | -1.672964 | 3.492679  |
| 43            | 7             | 0           | -3.952485               | -1.631536 | 3.450703  |

|    |    |   |           |           |           |
|----|----|---|-----------|-----------|-----------|
| 44 | 6  | 0 | -4.472745 | -1.236425 | 2.311298  |
| 45 | 6  | 0 | -3.719663 | -0.879702 | 1.150051  |
| 46 | 6  | 0 | -0.311048 | -1.400493 | 2.590476  |
| 47 | 1  | 0 | -4.262817 | -0.550034 | 0.278731  |
| 48 | 6  | 0 | -3.872930 | 1.140802  | -4.207546 |
| 49 | 1  | 0 | -4.799811 | 1.682293  | -4.338091 |
| 50 | 1  | 0 | -3.018825 | 1.748729  | -3.945604 |
| 51 | 1  | 0 | -4.727088 | -0.693626 | -4.633176 |
| 52 | 1  | 0 | -2.421902 | 0.280752  | -1.760538 |
| 53 | 6  | 0 | -1.961370 | -2.080470 | 4.730801  |
| 54 | 6  | 0 | -0.616361 | -2.136699 | 4.869588  |
| 55 | 6  | 0 | 0.221476  | -1.784564 | 3.775794  |
| 56 | 1  | 0 | -5.558043 | -1.184963 | 2.259055  |
| 57 | 1  | 0 | -2.629242 | -2.335042 | 5.543847  |
| 58 | 1  | 0 | -0.167614 | -2.441920 | 5.806233  |
| 59 | 1  | 0 | 1.296402  | -1.822568 | 3.900266  |
| 60 | 1  | 0 | 0.346827  | -1.122818 | 1.779894  |
| 61 | 6  | 0 | 2.659074  | 1.600056  | -2.325945 |
| 62 | 6  | 0 | 2.616568  | 0.146510  | -1.783741 |
| 63 | 8  | 0 | 1.863416  | 2.461887  | -2.001859 |
| 64 | 8  | 0 | 1.375848  | -0.176354 | -1.331979 |
| 65 | 8  | 0 | 3.696744  | 1.850459  | -3.146821 |
| 66 | 6  | 0 | 3.828549  | 3.208989  | -3.616000 |
| 67 | 1  | 0 | 2.939652  | 3.502184  | -4.179946 |
| 68 | 1  | 0 | 3.966321  | 3.888041  | -2.770777 |
| 69 | 1  | 0 | 4.710738  | 3.209048  | -4.256874 |
| 70 | 8  | 0 | 2.034884  | -1.069944 | -4.300748 |
| 71 | 15 | 0 | 3.025893  | -1.067056 | -3.172485 |
| 72 | 8  | 0 | 3.096818  | -2.446516 | -2.318133 |
| 73 | 6  | 0 | 3.519630  | -3.663747 | -2.953070 |
| 74 | 1  | 0 | 3.394142  | -4.454438 | -2.210360 |
| 75 | 1  | 0 | 4.571801  | -3.595288 | -3.246893 |
| 76 | 1  | 0 | 2.902567  | -3.880549 | -3.832282 |
| 77 | 8  | 0 | 4.572369  | -0.966340 | -3.679208 |
| 78 | 6  | 0 | 4.927409  | -0.436000 | -4.967362 |
| 79 | 1  | 0 | 4.100492  | -0.546964 | -5.674058 |
| 80 | 1  | 0 | 5.192805  | 0.619169  | -4.863142 |
| 81 | 1  | 0 | 5.795320  | -1.004665 | -5.311443 |
| 82 | 6  | 0 | 3.693391  | 0.060322  | -0.668163 |
| 83 | 1  | 0 | 3.432993  | 0.777572  | 0.118960  |
| 84 | 1  | 0 | 3.670572  | -0.944739 | -0.240191 |
| 85 | 1  | 0 | 4.702677  | 0.276068  | -1.035156 |

### Me-*ds*-TS3

Standard orientation:

| Center Number | Atomic Number | Atomic Type | Coordinates (Angstroms) |           |           |
|---------------|---------------|-------------|-------------------------|-----------|-----------|
|               |               |             | X                       | Y         | Z         |
| 1             | 7             | 0           | -0.301689               | 2.823439  | -0.076351 |
| 2             | 6             | 0           | -1.262615               | 1.878696  | 0.243006  |
| 3             | 7             | 0           | -0.740668               | 0.615132  | 0.247256  |
| 4             | 16            | 0           | -2.876217               | 2.247903  | 0.542353  |
| 5             | 6             | 0           | -0.368434               | 4.237318  | 0.079615  |
| 6             | 6             | 0           | -1.477646               | -0.639559 | 0.015155  |
| 7             | 6             | 0           | -1.975372               | -0.669047 | -1.463617 |
| 8             | 6             | 0           | -3.112774               | -1.636614 | -1.875868 |
| 9             | 6             | 0           | -2.846983               | -2.149793 | -3.307313 |
| 10            | 7             | 0           | -0.782072               | -0.961185 | -2.366686 |
| 11            | 6             | 0           | -1.080304               | -0.419019 | -3.729705 |
| 12            | 6             | 0           | -2.445450               | -0.968727 | -4.242942 |

|    |    |   |           |           |           |
|----|----|---|-----------|-----------|-----------|
| 13 | 6  | 0 | -0.522939 | -2.437960 | -2.474804 |
| 14 | 6  | 0 | -1.669514 | -3.134626 | -3.240703 |
| 15 | 1  | 0 | 0.409160  | 2.505187  | -0.741188 |
| 16 | 6  | 0 | -2.457002 | -0.984026 | 1.170337  |
| 17 | 1  | 0 | -0.691617 | -1.398700 | 0.069580  |
| 18 | 1  | 0 | -4.069011 | -1.108298 | -1.834292 |
| 19 | 1  | 0 | -3.187047 | -2.490617 | -1.189660 |
| 20 | 1  | 0 | -0.252170 | -0.723457 | -4.373937 |
| 21 | 1  | 0 | -1.058150 | 0.668906  | -3.653543 |
| 22 | 6  | 0 | -3.605182 | 0.036152  | -4.409117 |
| 23 | 1  | 0 | -2.277249 | -1.404283 | -5.241635 |
| 24 | 1  | 0 | 0.437886  | -2.546154 | -2.978520 |
| 25 | 1  | 0 | -0.411181 | -2.824968 | -1.459005 |
| 26 | 1  | 0 | -1.968202 | -4.055157 | -2.724450 |
| 27 | 1  | 0 | -3.741808 | -2.644327 | -3.700865 |
| 28 | 1  | 0 | -1.347297 | -3.419717 | -4.249988 |
| 29 | 1  | 0 | 0.242300  | 0.534251  | -0.030858 |
| 30 | 6  | 0 | -1.041238 | 4.844543  | 1.141303  |
| 31 | 6  | 0 | -1.026573 | 6.222406  | 1.269608  |
| 32 | 6  | 0 | -0.337792 | 7.012872  | 0.362198  |
| 33 | 6  | 0 | 0.344066  | 6.410823  | -0.683557 |
| 34 | 6  | 0 | 0.330609  | 5.035414  | -0.828378 |
| 35 | 1  | 0 | -1.555506 | 6.682811  | 2.094841  |
| 36 | 1  | 0 | -0.329613 | 8.088820  | 0.471743  |
| 37 | 1  | 0 | 0.889434  | 7.017250  | -1.395874 |
| 38 | 1  | 0 | 0.861043  | 4.562422  | -1.643698 |
| 39 | 1  | 0 | -1.576811 | 4.233859  | 1.852921  |
| 40 | 1  | 0 | 0.315371  | -0.507660 | -1.948040 |
| 41 | 6  | 0 | -1.908061 | -1.479803 | 2.414288  |
| 42 | 6  | 0 | -2.804113 | -1.822864 | 3.442321  |
| 43 | 7  | 0 | -4.196850 | -1.699758 | 3.332711  |
| 44 | 6  | 0 | -4.633052 | -1.218251 | 2.191046  |
| 45 | 6  | 0 | -3.801092 | -0.848401 | 1.089582  |
| 46 | 6  | 0 | -0.508155 | -1.631680 | 2.671420  |
| 47 | 1  | 0 | -4.278897 | -0.446371 | 0.210388  |
| 48 | 6  | 0 | -3.591384 | 1.331578  | -4.230610 |
| 49 | 1  | 0 | -4.478381 | 1.926771  | -4.398040 |
| 50 | 1  | 0 | -2.719380 | 1.884815  | -3.913331 |
| 51 | 1  | 0 | -4.522320 | -0.443393 | -4.734508 |
| 52 | 1  | 0 | -2.284890 | 0.348245  | -1.712079 |
| 53 | 6  | 0 | -2.303979 | -2.324437 | 4.685493  |
| 54 | 6  | 0 | -0.973437 | -2.463033 | 4.889559  |
| 55 | 6  | 0 | -0.060660 | -2.103474 | 3.860068  |
| 56 | 1  | 0 | -5.709622 | -1.102055 | 2.087136  |
| 57 | 1  | 0 | -3.027162 | -2.581592 | 5.448918  |
| 58 | 1  | 0 | -0.592531 | -2.839637 | 5.830209  |
| 59 | 1  | 0 | 1.002469  | -2.207159 | 4.037076  |
| 60 | 1  | 0 | 0.205697  | -1.350405 | 1.911291  |
| 61 | 6  | 0 | 2.371662  | 1.478505  | -2.680579 |
| 62 | 6  | 0 | 2.562659  | 0.147970  | -1.914230 |
| 63 | 8  | 0 | 1.442789  | 2.239546  | -2.485683 |
| 64 | 8  | 0 | 1.386438  | -0.252523 | -1.322552 |
| 65 | 8  | 0 | 3.362979  | 1.743556  | -3.548693 |
| 66 | 6  | 0 | 3.280678  | 3.003418  | -4.250448 |
| 67 | 1  | 0 | 2.360103  | 3.048823  | -4.837056 |
| 68 | 1  | 0 | 3.304115  | 3.832396  | -3.538854 |
| 69 | 1  | 0 | 4.155646  | 3.029087  | -4.900196 |
| 70 | 8  | 0 | 2.163512  | -1.429495 | -4.248932 |
| 71 | 15 | 0 | 3.109204  | -1.202655 | -3.109001 |
| 72 | 8  | 0 | 3.273315  | -2.426501 | -2.065834 |
| 73 | 6  | 0 | 3.759270  | -3.704042 | -2.513740 |
| 74 | 1  | 0 | 3.735336  | -4.359054 | -1.640870 |

|    |   |   |          |           |           |
|----|---|---|----------|-----------|-----------|
| 75 | 1 | 0 | 4.786352 | -3.614033 | -2.881684 |
| 76 | 1 | 0 | 3.113934 | -4.110152 | -3.299756 |
| 77 | 8 | 0 | 4.652733 | -0.995937 | -3.577880 |
| 78 | 6 | 0 | 5.006033 | -0.601344 | -4.916264 |
| 79 | 1 | 0 | 4.195164 | -0.827849 | -5.613331 |
| 80 | 1 | 0 | 5.224625 | 0.469427  | -4.926637 |
| 81 | 1 | 0 | 5.902274 | -1.166582 | -5.184329 |
| 82 | 6 | 0 | 3.650075 | 0.387034  | -0.838294 |
| 83 | 1 | 0 | 3.307203 | 1.179096  | -0.162773 |
| 84 | 1 | 0 | 3.775626 | -0.530408 | -0.258319 |
| 85 | 1 | 0 | 4.611694 | 0.674478  | -1.274217 |

### Me-*ds*-IM5

Standard orientation:

| Center Number | Atomic Number | Atomic Type | Coordinates (Angstroms) |           |           |
|---------------|---------------|-------------|-------------------------|-----------|-----------|
|               |               |             | X                       | Y         | Z         |
| 1             | 7             | 0           | -0.299412               | 2.819415  | -0.051714 |
| 2             | 6             | 0           | -1.305129               | 1.895326  | 0.199518  |
| 3             | 7             | 0           | -0.817197               | 0.620115  | 0.213601  |
| 4             | 16            | 0           | -2.918708               | 2.307440  | 0.418083  |
| 5             | 6             | 0           | -0.340027               | 4.230002  | 0.138267  |
| 6             | 6             | 0           | -1.563021               | -0.633429 | -0.009270 |
| 7             | 6             | 0           | -2.059828               | -0.694263 | -1.485031 |
| 8             | 6             | 0           | -3.167299               | -1.722747 | -1.845226 |
| 9             | 6             | 0           | -2.882728               | -2.284336 | -3.254688 |
| 10            | 7             | 0           | -0.872182               | -0.925272 | -2.383543 |
| 11            | 6             | 0           | -1.235245               | -0.453394 | -3.743747 |
| 12            | 6             | 0           | -2.556813               | -1.125499 | -4.245957 |
| 13            | 6             | 0           | -0.526400               | -2.373353 | -2.466822 |
| 14            | 6             | 0           | -1.649852               | -3.194606 | -3.153943 |
| 15            | 1             | 0           | 0.420733                | 2.502665  | -0.705324 |
| 16            | 6             | 0           | -2.555941               | -0.932807 | 1.148871  |
| 17            | 1             | 0           | -0.787311               | -1.400911 | 0.064644  |
| 18            | 1             | 0           | -4.148501               | -1.239289 | -1.821936 |
| 19            | 1             | 0           | -3.202477               | -2.552419 | -1.125324 |
| 20            | 1             | 0           | -0.398860               | -0.699397 | -4.404782 |
| 21            | 1             | 0           | -1.311931               | 0.635371  | -3.708267 |
| 22            | 6             | 0           | -3.787302               | -0.219608 | -4.467854 |
| 23            | 1             | 0           | -2.353751               | -1.596993 | -5.222524 |
| 24            | 1             | 0           | 0.412864                | -2.446192 | -3.020056 |
| 25            | 1             | 0           | -0.331842               | -2.736338 | -1.452725 |
| 26            | 1             | 0           | -1.887269               | -4.094404 | -2.571349 |
| 27            | 1             | 0           | -3.750422               | -2.848061 | -3.616373 |
| 28            | 1             | 0           | -1.336802               | -3.529541 | -4.151547 |
| 29            | 1             | 0           | 0.185530                | 0.532741  | 0.070592  |
| 30            | 6             | 0           | -1.032954               | 4.822734  | 1.195576  |
| 31            | 6             | 0           | -0.992997               | 6.195569  | 1.363566  |
| 32            | 6             | 0           | -0.258597               | 6.995601  | 0.501020  |
| 33            | 6             | 0           | 0.442868                | 6.407841  | -0.539506 |
| 34            | 6             | 0           | 0.404195                | 5.037416  | -0.723956 |
| 35            | 1             | 0           | -1.538087               | 6.644564  | 2.184584  |
| 36            | 1             | 0           | -0.230958               | 8.067620  | 0.641401  |
| 37            | 1             | 0           | 1.023241                | 7.021496  | -1.217141 |
| 38            | 1             | 0           | 0.949156                | 4.576507  | -1.536423 |
| 39            | 1             | 0           | -1.603815               | 4.204774  | 1.872745  |
| 40            | 1             | 0           | 0.777626                | -0.336962 | -1.838287 |
| 41            | 6             | 0           | -2.036431               | -1.424148 | 2.407181  |
| 42            | 6             | 0           | -2.952393               | -1.714533 | 3.433950  |
| 43            | 7             | 0           | -4.338813               | -1.544322 | 3.310000  |



|    |    |   |           |           |           |
|----|----|---|-----------|-----------|-----------|
| 44 | 6  | 0 | -4.747955 | -1.072171 | 2.154240  |
| 45 | 6  | 0 | -3.894119 | -0.753514 | 1.053597  |
| 46 | 6  | 0 | -0.645491 | -1.623501 | 2.680427  |
| 47 | 1  | 0 | -4.348742 | -0.355017 | 0.160261  |
| 48 | 6  | 0 | -3.884891 | 1.075715  | -4.315942 |
| 49 | 1  | 0 | -4.811795 | 1.593707  | -4.519113 |
| 50 | 1  | 0 | -3.069953 | 1.702857  | -3.985949 |
| 51 | 1  | 0 | -4.655395 | -0.776281 | -4.806079 |
| 52 | 1  | 0 | -2.427813 | 0.304773  | -1.731154 |
| 53 | 6  | 0 | -2.480686 | -2.208587 | 4.691347  |
| 54 | 6  | 0 | -1.157994 | -2.391643 | 4.910368  |
| 55 | 6  | 0 | -0.224576 | -2.087506 | 3.881640  |
| 56 | 1  | 0 | -5.819020 | -0.921211 | 2.038264  |
| 57 | 1  | 0 | -3.218986 | -2.423927 | 5.453286  |
| 58 | 1  | 0 | -0.798859 | -2.762878 | 5.861589  |
| 59 | 1  | 0 | 0.832422  | -2.228090 | 4.069367  |
| 60 | 1  | 0 | 0.084308  | -1.387923 | 1.920146  |
| 61 | 6  | 0 | 2.495526  | 1.526646  | -2.657218 |
| 62 | 6  | 0 | 2.753135  | 0.193256  | -1.927659 |
| 63 | 8  | 0 | 1.553220  | 2.253191  | -2.415473 |
| 64 | 8  | 0 | 1.592261  | -0.220055 | -1.253564 |
| 65 | 8  | 0 | 3.451274  | 1.821454  | -3.549806 |
| 66 | 6  | 0 | 3.307657  | 3.081095  | -4.246753 |
| 67 | 1  | 0 | 2.367469  | 3.095697  | -4.802413 |
| 68 | 1  | 0 | 3.328555  | 3.908112  | -3.533224 |
| 69 | 1  | 0 | 4.160276  | 3.132972  | -4.923504 |
| 70 | 8  | 0 | 2.280182  | -1.328460 | -4.270287 |
| 71 | 15 | 0 | 3.248727  | -1.147428 | -3.148596 |
| 72 | 8  | 0 | 3.419495  | -2.373317 | -2.118273 |
| 73 | 6  | 0 | 3.791092  | -3.681701 | -2.594739 |
| 74 | 1  | 0 | 3.782170  | -4.333031 | -1.719452 |
| 75 | 1  | 0 | 4.795663  | -3.656769 | -3.028949 |
| 76 | 1  | 0 | 3.068089  | -4.040103 | -3.333784 |
| 77 | 8  | 0 | 4.780747  | -0.910732 | -3.620942 |
| 78 | 6  | 0 | 5.121961  | -0.489844 | -4.957489 |
| 79 | 1  | 0 | 4.299747  | -0.692663 | -5.648046 |
| 80 | 1  | 0 | 5.350859  | 0.578364  | -4.943946 |
| 81 | 1  | 0 | 6.008651  | -1.058415 | -5.247511 |
| 82 | 6  | 0 | 3.847217  | 0.418492  | -0.867497 |
| 83 | 1  | 0 | 3.516833  | 1.199777  | -0.174298 |
| 84 | 1  | 0 | 3.994316  | -0.506861 | -0.305560 |
| 85 | 1  | 0 | 4.793578  | 0.716132  | -1.325874 |

### Me-*ms*-TS2

Standard orientation:

| Center Number | Atomic Number | Atomic Type | Coordinates (Angstroms) |           |           |
|---------------|---------------|-------------|-------------------------|-----------|-----------|
|               |               |             | X                       | Y         | Z         |
| 1             | 6             | 0           | 1.160046                | -1.983725 | -2.078357 |
| 2             | 6             | 0           | 1.021738                | -0.458323 | -1.959032 |
| 3             | 8             | 0           | -0.067925               | -0.008967 | -1.546097 |
| 4             | 8             | 0           | 2.300903                | -2.362949 | -2.678189 |
| 5             | 6             | 0           | 2.533047                | -3.781038 | -2.765644 |
| 6             | 1             | 0           | 2.571304                | -4.214273 | -1.762625 |
| 7             | 1             | 0           | 1.740266                | -4.262797 | -3.344229 |
| 8             | 1             | 0           | 3.495591                | -3.884422 | -3.267060 |
| 9             | 8             | 0           | 0.296322                | -2.766901 | -1.720703 |
| 10            | 8             | 0           | 2.017975                | 0.778479  | 0.994865  |
| 11            | 15            | 0           | 2.488628                | -0.426847 | 0.154534  |
| 12            | 8             | 0           | 2.244968                | -1.831582 | 1.011532  |

|    |    |   |           |           |           |
|----|----|---|-----------|-----------|-----------|
| 13 | 6  | 0 | 2.820575  | -1.997839 | 2.318400  |
| 14 | 1  | 0 | 2.412531  | -2.927757 | 2.724606  |
| 15 | 1  | 0 | 3.910322  | -2.072763 | 2.248443  |
| 16 | 1  | 0 | 2.554653  | -1.159431 | 2.972652  |
| 17 | 8  | 0 | 4.165877  | -0.437880 | 0.187917  |
| 18 | 6  | 0 | 4.892478  | 0.789608  | 0.100843  |
| 19 | 1  | 0 | 5.942149  | 0.545071  | 0.286147  |
| 20 | 1  | 0 | 4.542158  | 1.507486  | 0.849903  |
| 21 | 1  | 0 | 4.804325  | 1.233916  | -0.900071 |
| 22 | 7  | 0 | 0.419549  | 3.059043  | 0.065791  |
| 23 | 6  | 0 | -0.800745 | 2.617549  | 0.507054  |
| 24 | 7  | 0 | -0.665698 | 1.491135  | 1.273154  |
| 25 | 16 | 0 | -2.304241 | 3.324230  | 0.172247  |
| 26 | 6  | 0 | 0.795181  | 4.122703  | -0.800138 |
| 27 | 6  | 0 | -1.684069 | 0.815723  | 2.067651  |
| 28 | 6  | 0 | -2.701402 | 0.042742  | 1.193507  |
| 29 | 6  | 0 | -3.705114 | -0.829050 | 1.987438  |
| 30 | 6  | 0 | -3.886871 | -2.190750 | 1.286980  |
| 31 | 7  | 0 | -1.979048 | -0.887804 | 0.226335  |
| 32 | 6  | 0 | -2.937812 | -1.315241 | -0.859979 |
| 33 | 6  | 0 | -4.192283 | -1.973406 | -0.226110 |
| 34 | 6  | 0 | -1.409611 | -2.112885 | 0.904811  |
| 35 | 6  | 0 | -2.575482 | -2.986773 | 1.417823  |
| 36 | 1  | 0 | 1.200903  | 2.444121  | 0.337376  |
| 37 | 6  | 0 | -2.326818 | 1.736865  | 3.146022  |
| 38 | 1  | 0 | -1.120806 | 0.054971  | 2.621130  |
| 39 | 1  | 0 | -4.663837 | -0.308946 | 2.064052  |
| 40 | 1  | 0 | -3.348136 | -0.989733 | 3.014072  |
| 41 | 1  | 0 | -2.377953 | -2.003020 | -1.495566 |
| 42 | 1  | 0 | -3.154495 | -0.422403 | -1.444990 |
| 43 | 6  | 0 | -5.544061 | -1.259537 | -0.432131 |
| 44 | 1  | 0 | -4.302939 | -2.974033 | -0.672393 |
| 45 | 1  | 0 | -0.784769 | -2.606644 | 0.160767  |
| 46 | 1  | 0 | -0.753684 | -1.768298 | 1.704607  |
| 47 | 1  | 0 | -2.404925 | -3.264013 | 2.464397  |
| 48 | 1  | 0 | -4.710352 | -2.742288 | 1.752557  |
| 49 | 1  | 0 | -2.636110 | -3.919912 | 0.845316  |
| 50 | 1  | 0 | 0.288912  | 1.105558  | 1.328190  |
| 51 | 1  | 0 | -1.193598 | -0.407913 | -0.278032 |
| 52 | 6  | 0 | -0.098559 | 5.042210  | -1.346741 |
| 53 | 6  | 0 | 0.369494  | 6.048239  | -2.176660 |
| 54 | 6  | 0 | 1.717237  | 6.158875  | -2.472724 |
| 55 | 6  | 0 | 2.609423  | 5.246314  | -1.926434 |
| 56 | 6  | 0 | 2.158518  | 4.237812  | -1.098790 |
| 57 | 1  | 0 | 2.854366  | 3.529288  | -0.669973 |
| 58 | 1  | 0 | 3.666778  | 5.322078  | -2.147371 |
| 59 | 1  | 0 | 2.072799  | 6.948120  | -3.120990 |
| 60 | 1  | 0 | -0.334863 | 6.756043  | -2.596100 |
| 61 | 1  | 0 | -1.147196 | 4.942423  | -1.106440 |
| 62 | 6  | 0 | -3.591346 | 2.210366  | 3.062437  |
| 63 | 6  | 0 | -4.118961 | 3.041497  | 4.099214  |
| 64 | 7  | 0 | -3.460410 | 3.405248  | 5.175512  |
| 65 | 6  | 0 | -2.141071 | 2.936412  | 5.266516  |
| 66 | 6  | 0 | -1.536072 | 2.119991  | 4.294530  |
| 67 | 6  | 0 | -1.399797 | 3.333687  | 6.423481  |
| 68 | 6  | 0 | -0.115844 | 2.938502  | 6.589473  |
| 69 | 6  | 0 | 0.505559  | 2.122403  | 5.604401  |
| 70 | 6  | 0 | -0.175755 | 1.727441  | 4.501533  |
| 71 | 1  | 0 | -4.229457 | 1.990806  | 2.220202  |
| 72 | 1  | 0 | -5.140756 | 3.401964  | 4.003213  |
| 73 | 1  | 0 | 0.325125  | 1.121887  | 3.760400  |
| 74 | 1  | 0 | 1.536537  | 1.820679  | 5.741079  |

|    |   |   |           |           |           |
|----|---|---|-----------|-----------|-----------|
| 75 | 1 | 0 | 0.448674  | 3.240385  | 7.462493  |
| 76 | 1 | 0 | -1.902018 | 3.959691  | 7.149985  |
| 77 | 1 | 0 | -3.213719 | 0.760873  | 0.553045  |
| 78 | 6 | 0 | -5.778163 | -0.116190 | -1.022003 |
| 79 | 1 | 0 | -6.371591 | -1.827226 | -0.021105 |
| 80 | 1 | 0 | -6.785086 | 0.269411  | -1.105405 |
| 81 | 1 | 0 | -5.009943 | 0.507131  | -1.457357 |
| 82 | 6 | 0 | 1.896853  | 0.400629  | -2.855361 |
| 83 | 1 | 0 | 2.921665  | 0.034911  | -2.929280 |
| 84 | 1 | 0 | 1.452388  | 0.393640  | -3.861580 |
| 85 | 1 | 0 | 1.880119  | 1.430804  | -2.492240 |

## Me-*dr*-TS2

Standard orientation:

| Center<br>Number | Atomic<br>Number | Atomic<br>Type | Coordinates (Angstroms) |           |           |
|------------------|------------------|----------------|-------------------------|-----------|-----------|
|                  |                  |                | X                       | Y         | Z         |
| 1                | 1                | 0              | 3.539353                | -1.927953 | -5.358439 |
| 2                | 6                | 0              | 2.600068                | 0.754957  | -3.511228 |
| 3                | 6                | 0              | 4.104232                | 0.893118  | -3.182967 |
| 4                | 6                | 0              | 4.585041                | -0.410195 | -2.486170 |
| 5                | 6                | 0              | 4.058969                | -1.585218 | -3.343112 |
| 6                | 6                | 0              | 2.436068                | -0.196964 | -4.714355 |
| 7                | 6                | 0              | 4.829073                | -0.274307 | -5.277600 |
| 8                | 6                | 0              | 4.908431                | 1.056720  | -4.490739 |
| 9                | 7                | 0              | 3.689299                | -1.084476 | -4.722729 |
| 10               | 1                | 0              | 5.730031                | -0.883561 | -5.165610 |
| 11               | 1                | 0              | 4.646050                | -0.137165 | -6.346110 |
| 12               | 1                | 0              | 5.955370                | 1.298833  | -4.276032 |
| 13               | 1                | 0              | 4.503244                | 1.884044  | -5.085344 |
| 14               | 1                | 0              | 5.688733                | -0.407661 | -2.517930 |
| 15               | 1                | 0              | 3.166024                | -2.039351 | -2.930736 |
| 16               | 1                | 0              | 2.522876                | 0.362059  | -5.651859 |
| 17               | 1                | 0              | 2.167194                | 1.730056  | -3.749482 |
| 18               | 1                | 0              | 4.268982                | 1.755864  | -2.530087 |
| 19               | 1                | 0              | 2.045930                | 0.377108  | -2.647212 |
| 20               | 7                | 0              | -0.515252               | -2.871620 | -2.184801 |
| 21               | 6                | 0              | -0.126435               | -1.678973 | -2.745584 |
| 22               | 7                | 0              | 0.826151                | -1.883915 | -3.710409 |
| 23               | 16               | 0              | -0.717413               | -0.150933 | -2.340193 |
| 24               | 6                | 0              | -1.243548               | -3.175100 | -0.999580 |
| 25               | 6                | 0              | 1.147158                | -1.054509 | -4.873042 |
| 26               | 1                | 0              | -0.245036               | -3.698190 | -2.727634 |
| 27               | 6                | 0              | -1.504851               | -4.526396 | -0.746472 |
| 28               | 6                | 0              | -2.188180               | -4.903692 | 0.392349  |
| 29               | 6                | 0              | -2.621598               | -3.947654 | 1.300449  |
| 30               | 6                | 0              | -2.363008               | -2.610386 | 1.051534  |
| 31               | 6                | 0              | -1.680080               | -2.215964 | -0.087689 |
| 32               | 1                | 0              | -2.384186               | -5.953113 | 0.573728  |
| 33               | 1                | 0              | -3.157349               | -4.245127 | 2.191582  |
| 34               | 1                | 0              | -2.698605               | -1.855966 | 1.752453  |
| 35               | 1                | 0              | -1.486775               | -1.174377 | -0.297966 |
| 36               | 1                | 0              | -1.166623               | -5.271547 | -1.453750 |
| 37               | 6                | 0              | -0.099965               | 1.062709  | -5.605193 |
| 38               | 6                | 0              | -0.066792               | -0.283382 | -5.471999 |
| 39               | 6                | 0              | -1.226920               | 1.703276  | -6.207439 |
| 40               | 7                | 0              | -2.283027               | 1.079642  | -6.674313 |
| 41               | 6                | 0              | -2.256367               | -0.319203 | -6.562319 |
| 42               | 1                | 0              | 0.699950                | 1.694880  | -5.256222 |
| 43               | 1                | 0              | 4.791943                | -2.381217 | -3.486802 |

|    |    |   |           |           |           |
|----|----|---|-----------|-----------|-----------|
| 44 | 1  | 0 | 1.237312  | -2.824406 | -3.739153 |
| 45 | 1  | 0 | 1.422507  | -1.786968 | -5.644614 |
| 46 | 6  | 0 | 4.190094  | -0.469778 | -0.997850 |
| 47 | 6  | 0 | 3.679100  | -1.488870 | -0.356743 |
| 48 | 1  | 0 | 3.460635  | -1.429256 | 0.700774  |
| 49 | 1  | 0 | 3.448313  | -2.434847 | -0.826415 |
| 50 | 1  | 0 | 4.409758  | 0.447638  | -0.463177 |
| 51 | 6  | 0 | -1.191502 | -1.036116 | -5.987659 |
| 52 | 6  | 0 | -1.282150 | -2.463068 | -5.963869 |
| 53 | 6  | 0 | -3.388273 | -1.020647 | -7.082821 |
| 54 | 6  | 0 | -3.443621 | -2.372508 | -7.036074 |
| 55 | 6  | 0 | -2.365252 | -3.103560 | -6.467871 |
| 56 | 1  | 0 | -1.221190 | 2.788065  | -6.287870 |
| 57 | 1  | 0 | -0.478137 | -3.044764 | -5.538579 |
| 58 | 1  | 0 | -2.413809 | -4.184718 | -6.440380 |
| 59 | 1  | 0 | -4.299167 | -2.906032 | -7.430339 |
| 60 | 1  | 0 | -4.188178 | -0.431599 | -7.512752 |
| 61 | 8  | 0 | 3.849673  | -5.372037 | -7.583630 |
| 62 | 8  | 0 | 3.399197  | -3.078883 | -6.466387 |
| 63 | 15 | 0 | 2.858744  | -4.526124 | -6.528385 |
| 64 | 6  | 0 | 5.265898  | -5.196222 | -7.537070 |
| 65 | 1  | 0 | 5.532063  | -4.135188 | -7.593724 |
| 66 | 1  | 0 | 5.675749  | -5.725482 | -8.401846 |
| 67 | 1  | 0 | 5.691623  | -5.630699 | -6.622177 |
| 68 | 8  | 0 | 1.476428  | -4.578346 | -7.428949 |
| 69 | 6  | 0 | 1.427761  | -4.027972 | -8.756696 |
| 70 | 1  | 0 | 1.788013  | -2.993356 | -8.761528 |
| 71 | 1  | 0 | 2.032715  | -4.632142 | -9.440192 |
| 72 | 1  | 0 | 0.379568  | -4.053650 | -9.064705 |
| 73 | 6  | 0 | 1.034345  | -5.775498 | -4.514954 |
| 74 | 6  | 0 | 2.455087  | -5.291208 | -4.181257 |
| 75 | 8  | 0 | 0.036054  | -5.133766 | -4.228979 |
| 76 | 8  | 0 | 2.532823  | -4.234554 | -3.514744 |
| 77 | 8  | 0 | 1.001341  | -6.979078 | -5.101542 |
| 78 | 6  | 0 | -0.293387 | -7.447060 | -5.528793 |
| 79 | 1  | 0 | -0.975654 | -7.511703 | -4.677351 |
| 80 | 1  | 0 | -0.699848 | -6.763987 | -6.278753 |
| 81 | 1  | 0 | -0.114491 | -8.432341 | -5.959748 |
| 82 | 6  | 0 | 3.543843  | -6.349006 | -4.069513 |
| 83 | 1  | 0 | 3.402410  | -6.878914 | -3.116164 |
| 84 | 1  | 0 | 3.517406  | -7.080052 | -4.879164 |
| 85 | 1  | 0 | 4.519785  | -5.857429 | -4.035868 |

### Me-*mr*-TS2

Standard orientation:

| Center Number | Atomic Number | Atomic Type | Coordinates (Angstroms) |           |           |
|---------------|---------------|-------------|-------------------------|-----------|-----------|
|               |               |             | X                       | Y         | Z         |
| 1             | 6             | 0           | 0.997953                | -0.360661 | -1.945135 |
| 2             | 6             | 0           | 1.439339                | -1.604051 | -1.161490 |
| 3             | 8             | 0           | 0.533352                | -2.137394 | -0.482261 |
| 4             | 8             | 0           | 2.180365                | 1.063249  | 1.074615  |
| 5             | 15            | 0           | 2.770335                | -0.223631 | 0.458469  |
| 6             | 8             | 0           | 2.865916                | -1.403355 | 1.605674  |
| 7             | 6             | 0           | 3.527659                | -1.156257 | 2.856019  |
| 8             | 1             | 0           | 3.325559                | -2.023430 | 3.490511  |
| 9             | 1             | 0           | 4.606817                | -1.053111 | 2.702419  |
| 10            | 1             | 0           | 3.136841                | -0.249668 | 3.331569  |
| 11            | 8             | 0           | 4.418919                | 0.008715  | 0.252635  |
| 12            | 6             | 0           | 4.907594                | 1.231200  | -0.296906 |

|    |    |   |           |           |           |
|----|----|---|-----------|-----------|-----------|
| 13 | 1  | 0 | 5.997133  | 1.144549  | -0.332836 |
| 14 | 1  | 0 | 4.629048  | 2.081874  | 0.334617  |
| 15 | 1  | 0 | 4.530919  | 1.393653  | -1.316196 |
| 16 | 7  | 0 | 0.523940  | 3.163308  | 0.067575  |
| 17 | 6  | 0 | -0.705097 | 2.679525  | 0.435967  |
| 18 | 7  | 0 | -0.587291 | 1.520145  | 1.153710  |
| 19 | 16 | 0 | -2.201815 | 3.384766  | 0.052563  |
| 20 | 6  | 0 | 0.915321  | 4.300812  | -0.691600 |
| 21 | 6  | 0 | -1.622250 | 0.816508  | 1.911545  |
| 22 | 6  | 0 | -2.677896 | 0.165142  | 0.980646  |
| 23 | 6  | 0 | -3.939287 | -0.417163 | 1.658193  |
| 24 | 6  | 0 | -4.378887 | -1.699989 | 0.922719  |
| 25 | 7  | 0 | -2.050226 | -0.984550 | 0.184949  |
| 26 | 6  | 0 | -2.895940 | -1.232782 | -1.041519 |
| 27 | 6  | 0 | -4.371923 | -1.464980 | -0.618840 |
| 28 | 6  | 0 | -1.945342 | -2.259063 | 0.995222  |
| 29 | 6  | 0 | -3.363693 | -2.808431 | 1.250265  |
| 30 | 1  | 0 | 1.312334  | 2.569627  | 0.376295  |
| 31 | 6  | 0 | -2.183110 | 1.674343  | 3.083624  |
| 32 | 1  | 0 | -1.080494 | -0.014432 | 2.372899  |
| 33 | 1  | 0 | -4.735787 | 0.330294  | 1.633073  |
| 34 | 1  | 0 | -3.749950 | -0.646446 | 2.715628  |
| 35 | 1  | 0 | -2.463405 | -2.106344 | -1.533518 |
| 36 | 1  | 0 | -2.747648 | -0.376090 | -1.695826 |
| 37 | 6  | 0 | -5.403945 | -0.397795 | -1.037162 |
| 38 | 1  | 0 | -4.701696 | -2.408692 | -1.081136 |
| 39 | 1  | 0 | -1.298956 | -2.928364 | 0.431356  |
| 40 | 1  | 0 | -1.419257 | -2.008985 | 1.917611  |
| 41 | 1  | 0 | -3.459109 | -3.118200 | 2.297073  |
| 42 | 1  | 0 | -5.382791 | -1.993811 | 1.245972  |
| 43 | 1  | 0 | -3.552302 | -3.695992 | 0.634406  |
| 44 | 1  | 0 | 0.378706  | 1.189122  | 1.290754  |
| 45 | 1  | 0 | -1.098301 | -0.747760 | -0.167466 |
| 46 | 6  | 0 | 0.028942  | 5.222003  | -1.247711 |
| 47 | 6  | 0 | 0.516153  | 6.298225  | -1.972023 |
| 48 | 6  | 0 | 1.876306  | 6.477394  | -2.155025 |
| 49 | 6  | 0 | 2.761441  | 5.562632  | -1.600730 |
| 50 | 6  | 0 | 2.291276  | 4.485657  | -0.876923 |
| 51 | 1  | 0 | 2.980963  | 3.775488  | -0.442114 |
| 52 | 1  | 0 | 3.828466  | 5.690760  | -1.733305 |
| 53 | 1  | 0 | 2.246828  | 7.320852  | -2.721505 |
| 54 | 1  | 0 | -0.183503 | 7.006626  | -2.398210 |
| 55 | 1  | 0 | -1.029568 | 5.070264  | -1.094735 |
| 56 | 6  | 0 | -3.328926 | 2.388245  | 2.989946  |
| 57 | 6  | 0 | -3.790006 | 3.160540  | 4.101041  |
| 58 | 7  | 0 | -3.176238 | 3.245745  | 5.258851  |
| 59 | 6  | 0 | -1.972395 | 2.532532  | 5.361499  |
| 60 | 6  | 0 | -1.435636 | 1.754093  | 4.319890  |
| 61 | 6  | 0 | -1.277260 | 2.633094  | 6.607510  |
| 62 | 6  | 0 | -0.097254 | 1.996644  | 6.793385  |
| 63 | 6  | 0 | 0.460909  | 1.223547  | 5.738585  |
| 64 | 6  | 0 | -0.180921 | 1.105643  | 4.550871  |
| 65 | 1  | 0 | -3.910555 | 2.406672  | 2.081046  |
| 66 | 1  | 0 | -4.718546 | 3.717072  | 3.994859  |
| 67 | 1  | 0 | 0.278732  | 0.527789  | 3.762570  |
| 68 | 1  | 0 | 1.413016  | 0.730422  | 5.890397  |
| 69 | 1  | 0 | 0.433103  | 2.074185  | 7.733929  |
| 70 | 1  | 0 | -1.727524 | 3.237589  | 7.384566  |
| 71 | 1  | 0 | -2.959283 | 0.904655  | 0.231824  |
| 72 | 6  | 0 | -5.199413 | 0.723399  | -1.678373 |
| 73 | 1  | 0 | -6.412063 | -0.670759 | -0.745800 |
| 74 | 1  | 0 | -6.022664 | 1.382200  | -1.919317 |

|    |   |   |           |           |           |
|----|---|---|-----------|-----------|-----------|
| 75 | 1 | 0 | -4.226940 | 1.066317  | -2.003088 |
| 76 | 6 | 0 | 1.497644  | 1.243787  | -3.609030 |
| 77 | 1 | 0 | 1.309485  | 2.084042  | -2.936024 |
| 78 | 1 | 0 | 2.341818  | 1.451264  | -4.267096 |
| 79 | 1 | 0 | 0.595888  | 1.036342  | -4.191025 |
| 80 | 8 | 0 | -0.099928 | 0.149259  | -1.779376 |
| 81 | 8 | 0 | 1.883310  | 0.075813  | -2.854135 |
| 82 | 6 | 0 | 2.586404  | -2.436558 | -1.707938 |
| 83 | 1 | 0 | 2.193498  | -3.056448 | -2.527696 |
| 84 | 1 | 0 | 3.410313  | -1.832236 | -2.091111 |
| 85 | 1 | 0 | 2.948576  | -3.101501 | -0.920427 |

### Et- $\alpha$ -ketoester

Standard orientation:

| Center Number | Atomic Number | Atomic Type | Coordinates (Angstroms) |           |          |
|---------------|---------------|-------------|-------------------------|-----------|----------|
|               |               |             | X                       | Y         | Z        |
| 1             | 6             | 0           | 2.880469                | 0.996479  | 1.399327 |
| 2             | 6             | 0           | 2.520288                | -0.517330 | 1.334329 |
| 3             | 8             | 0           | 2.120166                | 1.880759  | 1.086801 |
| 4             | 8             | 0           | 1.380585                | -0.810484 | 1.048715 |
| 5             | 8             | 0           | 4.138365                | 1.186940  | 1.846829 |
| 6             | 6             | 0           | 4.569081                | 2.561234  | 1.949033 |
| 7             | 1             | 0           | 4.538146                | 3.037567  | 0.965794 |
| 8             | 1             | 0           | 3.919765                | 3.107336  | 2.637980 |
| 9             | 1             | 0           | 5.589812                | 2.516809  | 2.328317 |
| 10            | 6             | 0           | 3.608978                | -1.529969 | 1.624922 |
| 11            | 1             | 0           | 4.447094                | -1.326432 | 0.942659 |
| 12            | 1             | 0           | 4.009854                | -1.314354 | 2.625418 |
| 13            | 6             | 0           | 3.134926                | -2.978384 | 1.511505 |
| 14            | 1             | 0           | 3.961248                | -3.663673 | 1.729104 |
| 15            | 1             | 0           | 2.321250                | -3.184876 | 2.214048 |
| 16            | 1             | 0           | 2.761973                | -3.195821 | 0.505519 |

### Et-*ds*-TS2

Standard orientation:

| Center Number | Atomic Number | Atomic Type | Coordinates (Angstroms) |           |           |
|---------------|---------------|-------------|-------------------------|-----------|-----------|
|               |               |             | X                       | Y         | Z         |
| 1             | 7             | 0           | -0.330246               | 2.646561  | -0.181365 |
| 2             | 6             | 0           | -1.266990               | 1.669580  | -0.387123 |
| 3             | 7             | 0           | -0.920206               | 0.495771  | 0.216724  |
| 4             | 16            | 0           | -2.690543               | 1.845359  | -1.300794 |
| 5             | 6             | 0           | -0.223364               | 3.993135  | -0.641452 |
| 6             | 6             | 0           | -1.738174               | -0.702355 | 0.412643  |
| 7             | 6             | 0           | -1.995914               | -1.455011 | -0.910216 |
| 8             | 6             | 0           | -2.839993               | -2.745481 | -0.791701 |
| 9             | 6             | 0           | -2.269103               | -3.824321 | -1.734694 |
| 10            | 7             | 0           | -0.672012               | -1.854190 | -1.555792 |
| 11            | 6             | 0           | -0.921151               | -2.137317 | -3.014661 |
| 12            | 6             | 0           | -2.026110               | -3.221303 | -3.153089 |
| 13            | 6             | 0           | -0.035915               | -3.060893 | -0.908792 |
| 14            | 6             | 0           | -0.921707               | -4.299154 | -1.162167 |
| 15            | 1             | 0           | 0.452462                | 2.368303  | 0.420622  |
| 16            | 6             | 0           | -2.996159               | -0.423053 | 1.281373  |
| 17            | 1             | 0           | -1.087360               | -1.347891 | 1.007285  |
| 18            | 1             | 0           | -3.880243               | -2.524655 | -1.045547 |

|    |    |   |           |           |           |
|----|----|---|-----------|-----------|-----------|
| 19 | 1  | 0 | -2.835879 | -3.121021 | 0.240750  |
| 20 | 1  | 0 | 0.034722  | -2.459853 | -3.431478 |
| 21 | 1  | 0 | -1.177784 | -1.184945 | -3.476712 |
| 22 | 6  | 0 | -3.351179 | -2.798150 | -3.820090 |
| 23 | 1  | 0 | -1.617791 | -4.034061 | -3.774314 |
| 24 | 1  | 0 | 0.959376  | -3.141484 | -1.348085 |
| 25 | 1  | 0 | 0.101545  | -2.823992 | 0.146399  |
| 26 | 1  | 0 | -1.079308 | -4.845069 | -0.225159 |
| 27 | 1  | 0 | -2.965474 | -4.666002 | -1.809123 |
| 28 | 1  | 0 | -0.433738 | -4.991997 | -1.858383 |
| 29 | 1  | 0 | -0.003067 | 0.410933  | 0.674048  |
| 30 | 6  | 0 | -1.159286 | 4.619231  | -1.461062 |
| 31 | 6  | 0 | -0.960768 | 5.934383  | -1.851554 |
| 32 | 6  | 0 | 0.156055  | 6.639220  | -1.437973 |
| 33 | 6  | 0 | 1.088986  | 6.015862  | -0.619979 |
| 34 | 6  | 0 | 0.906084  | 4.706681  | -0.223038 |
| 35 | 1  | 0 | -1.694998 | 6.411400  | -2.488937 |
| 36 | 1  | 0 | 0.301762  | 7.665265  | -1.747561 |
| 37 | 1  | 0 | 1.967180  | 6.555978  | -0.289126 |
| 38 | 1  | 0 | 1.631606  | 4.217963  | 0.413289  |
| 39 | 1  | 0 | -2.027028 | 4.056497  | -1.773103 |
| 40 | 1  | 0 | 0.063423  | -1.099149 | -1.512650 |
| 41 | 6  | 0 | -2.835305 | -0.268287 | 2.710400  |
| 42 | 6  | 0 | -3.986780 | -0.016216 | 3.476908  |
| 43 | 7  | 0 | -5.273634 | 0.102614  | 2.929976  |
| 44 | 6  | 0 | -5.350901 | -0.027242 | 1.625398  |
| 45 | 6  | 0 | -4.239286 | -0.289077 | 0.764822  |
| 46 | 6  | 0 | -1.578936 | -0.348247 | 3.392026  |
| 47 | 1  | 0 | -4.425098 | -0.361888 | -0.296085 |
| 48 | 6  | 0 | -3.702669 | -1.615342 | -4.253077 |
| 49 | 1  | 0 | -4.668109 | -1.457625 | -4.714152 |
| 50 | 1  | 0 | -3.076359 | -0.737018 | -4.186244 |
| 51 | 1  | 0 | -4.038600 | -3.630199 | -3.926453 |
| 52 | 1  | 0 | -2.448581 | -0.758951 | -1.616159 |
| 53 | 6  | 0 | -3.878261 | 0.137102  | 4.894905  |
| 54 | 6  | 0 | -2.674565 | 0.049708  | 5.507708  |
| 55 | 6  | 0 | -1.505006 | -0.194779 | 4.736501  |
| 56 | 1  | 0 | -6.338465 | 0.070755  | 1.179931  |
| 57 | 1  | 0 | -4.788090 | 0.327063  | 5.449942  |
| 58 | 1  | 0 | -2.588708 | 0.167668  | 6.580394  |
| 59 | 1  | 0 | -0.546535 | -0.254871 | 5.236709  |
| 60 | 1  | 0 | -0.672132 | -0.522322 | 2.829125  |
| 61 | 6  | 0 | 2.869052  | 0.979063  | 1.456587  |
| 62 | 6  | 0 | 2.506464  | -0.502846 | 1.266088  |
| 63 | 8  | 0 | 2.058789  | 1.889944  | 1.366796  |
| 64 | 8  | 0 | 1.280030  | -0.789584 | 1.345737  |
| 65 | 8  | 0 | 4.161599  | 1.176903  | 1.750291  |
| 66 | 6  | 0 | 4.601359  | 2.547331  | 1.825110  |
| 67 | 1  | 0 | 4.471344  | 3.028686  | 0.852393  |
| 68 | 1  | 0 | 4.034423  | 3.088350  | 2.586914  |
| 69 | 1  | 0 | 5.657341  | 2.495186  | 2.091360  |
| 70 | 8  | 0 | 1.643407  | -0.571964 | -1.894864 |
| 71 | 15 | 0 | 2.929254  | -0.298194 | -1.103067 |
| 72 | 8  | 0 | 4.123513  | -1.355774 | -1.561099 |
| 73 | 6  | 0 | 4.547434  | -1.432620 | -2.929992 |
| 74 | 1  | 0 | 5.261586  | -2.257924 | -2.992447 |
| 75 | 1  | 0 | 5.040329  | -0.500917 | -3.229872 |
| 76 | 1  | 0 | 3.697064  | -1.631384 | -3.592888 |
| 77 | 8  | 0 | 3.559362  | 1.152891  | -1.630276 |
| 78 | 6  | 0 | 2.927532  | 1.924727  | -2.663842 |
| 79 | 1  | 0 | 3.138209  | 1.496420  | -3.650994 |
| 80 | 1  | 0 | 1.844716  | 1.972631  | -2.519972 |

|    |   |   |          |           |           |
|----|---|---|----------|-----------|-----------|
| 81 | 1 | 0 | 3.357097 | 2.928483  | -2.604536 |
| 82 | 6 | 0 | 3.563336 | -1.517147 | 1.717005  |
| 83 | 1 | 0 | 4.539370 | -1.266204 | 1.295401  |
| 84 | 1 | 0 | 3.649932 | -1.388120 | 2.807835  |
| 85 | 6 | 0 | 3.192467 | -2.967355 | 1.405777  |
| 86 | 1 | 0 | 3.941172 | -3.647665 | 1.828360  |
| 87 | 1 | 0 | 2.216561 | -3.222501 | 1.831053  |
| 88 | 1 | 0 | 3.159516 | -3.138283 | 0.323970  |

## Et-*ms*-TS2

Standard orientation:

| Center<br>Number | Atomic<br>Number | Atomic<br>Type | Coordinates (Angstroms) |           |           |
|------------------|------------------|----------------|-------------------------|-----------|-----------|
|                  |                  |                | X                       | Y         | Z         |
| 1                | 6                | 0              | 1.327836                | -2.352907 | -1.719499 |
| 2                | 6                | 0              | 1.070203                | -0.848864 | -1.928050 |
| 3                | 8                | 0              | -0.049329               | -0.402994 | -1.591374 |
| 4                | 8                | 0              | 2.523141                | -2.751096 | -2.185275 |
| 5                | 6                | 0              | 2.872840                | -4.126416 | -1.945322 |
| 6                | 1                | 0              | 2.896959                | -4.318369 | -0.869438 |
| 7                | 1                | 0              | 2.151177                | -4.794100 | -2.423769 |
| 8                | 1                | 0              | 3.864152                | -4.251239 | -2.381786 |
| 9                | 8                | 0              | 0.509260                | -3.116772 | -1.237739 |
| 10               | 8                | 0              | 1.990493                | 0.906395  | 0.871058  |
| 11               | 15               | 0              | 2.565119                | -0.290541 | 0.084527  |
| 12               | 8                | 0              | 2.585058                | -1.636123 | 1.058753  |
| 13               | 6                | 0              | 3.228345                | -1.597247 | 2.343242  |
| 14               | 1                | 0              | 2.977883                | -2.534898 | 2.847253  |
| 15               | 1                | 0              | 4.313872                | -1.519900 | 2.223902  |
| 16               | 1                | 0              | 2.864895                | -0.750091 | 2.935928  |
| 17               | 8                | 0              | 4.226415                | -0.072455 | -0.021014 |
| 18               | 6                | 0              | 4.771125                | 1.230855  | -0.229203 |
| 19               | 1                | 0              | 5.858070                | 1.129031  | -0.164347 |
| 20               | 1                | 0              | 4.419675                | 1.929915  | 0.537119  |
| 21               | 1                | 0              | 4.510701                | 1.619271  | -1.223342 |
| 22               | 7                | 0              | 0.325914                | 3.159679  | 0.062466  |
| 23               | 6                | 0              | -0.881309               | 2.658801  | 0.472834  |
| 24               | 7                | 0              | -0.721707               | 1.478968  | 1.150206  |
| 25               | 16               | 0              | -2.401469               | 3.355577  | 0.187961  |
| 26               | 6                | 0              | 0.678138                | 4.325810  | -0.672986 |
| 27               | 6                | 0              | -1.704672               | 0.779891  | 1.972921  |
| 28               | 6                | 0              | -2.770650               | 0.061708  | 1.111381  |
| 29               | 6                | 0              | -3.841066               | -0.736879 | 1.892484  |
| 30               | 6                | 0              | -4.154038               | -2.052736 | 1.149304  |
| 31               | 7                | 0              | -2.098389               | -0.927155 | 0.164032  |
| 32               | 6                | 0              | -3.054227               | -1.258933 | -0.956461 |
| 33               | 6                | 0              | -4.396987               | -1.765476 | -0.363956 |
| 34               | 6                | 0              | -1.674394               | -2.202763 | 0.859133  |
| 35               | 6                | 0              | -2.936105               | -2.984455 | 1.281257  |
| 36               | 1                | 0              | 1.125705                | 2.554186  | 0.301974  |
| 37               | 6                | 0              | -2.268067               | 1.660775  | 3.125721  |
| 38               | 1                | 0              | -1.122519               | -0.012409 | 2.456610  |
| 39               | 1                | 0              | -4.745508               | -0.131693 | 1.993871  |
| 40               | 1                | 0              | -3.493132               | -0.962813 | 2.910026  |
| 41               | 1                | 0              | -2.554029               | -2.014933 | -1.564031 |
| 42               | 1                | 0              | -3.148417               | -0.356918 | -1.559392 |
| 43               | 6                | 0              | -5.643608               | -0.883302 | -0.581051 |
| 44               | 1                | 0              | -4.621395               | -2.734607 | -0.836399 |
| 45               | 1                | 0              | -1.033757               | -2.734547 | 0.155311  |
| 46               | 1                | 0              | -1.056431               | -1.915347 | 1.711156  |



|    |   |   |           |           |           |
|----|---|---|-----------|-----------|-----------|
| 47 | 1 | 0 | -2.831760 | -3.331187 | 2.315576  |
| 48 | 1 | 0 | -5.042588 | -2.524843 | 1.581069  |
| 49 | 1 | 0 | -3.065390 | -3.875373 | 0.655402  |
| 50 | 1 | 0 | 0.245340  | 1.122384  | 1.190257  |
| 51 | 1 | 0 | -1.247809 | -0.530690 | -0.302323 |
| 52 | 6 | 0 | -0.242202 | 5.231929  | -1.196874 |
| 53 | 6 | 0 | 0.204386  | 6.340362  | -1.898580 |
| 54 | 6 | 0 | 1.556523  | 6.565521  | -2.090001 |
| 55 | 6 | 0 | 2.475205  | 5.665506  | -1.566968 |
| 56 | 6 | 0 | 2.045910  | 4.557388  | -0.865040 |
| 57 | 1 | 0 | 2.762091  | 3.859162  | -0.453679 |
| 58 | 1 | 0 | 3.536332  | 5.830187  | -1.706290 |
| 59 | 1 | 0 | 1.895217  | 7.433594  | -2.638963 |
| 60 | 1 | 0 | -0.520861 | 7.037221  | -2.300303 |
| 61 | 1 | 0 | -1.293944 | 5.046061  | -1.034719 |
| 62 | 6 | 0 | -3.504420 | 2.209773  | 3.103590  |
| 63 | 6 | 0 | -3.960656 | 3.001168  | 4.203480  |
| 64 | 7 | 0 | -3.258975 | 3.256830  | 5.283623  |
| 65 | 6 | 0 | -1.965878 | 2.712796  | 5.310020  |
| 66 | 6 | 0 | -1.429124 | 1.929489  | 4.272700  |
| 67 | 6 | 0 | -1.177379 | 2.995815  | 6.469317  |
| 68 | 6 | 0 | 0.087770  | 2.526213  | 6.574830  |
| 69 | 6 | 0 | 0.642154  | 1.746836  | 5.522418  |
| 70 | 6 | 0 | -0.085539 | 1.458505  | 4.416125  |
| 71 | 1 | 0 | -4.170601 | 2.079966  | 2.264496  |
| 72 | 1 | 0 | -4.962049 | 3.423326  | 4.156707  |
| 73 | 1 | 0 | 0.367510  | 0.880653  | 3.623796  |
| 74 | 1 | 0 | 1.659857  | 1.387269  | 5.609954  |
| 75 | 1 | 0 | 0.688183  | 2.741816  | 7.449461  |
| 76 | 1 | 0 | -1.628519 | 3.598375  | 7.247343  |
| 77 | 1 | 0 | -3.232518 | 0.805078  | 0.461120  |
| 78 | 6 | 0 | -5.723826 | 0.279271  | -1.174360 |
| 79 | 1 | 0 | -6.540955 | -1.340433 | -0.178907 |
| 80 | 1 | 0 | -6.672470 | 0.790151  | -1.267747 |
| 81 | 1 | 0 | -4.878224 | 0.799380  | -1.601965 |
| 82 | 6 | 0 | 1.853845  | -0.187527 | -3.059945 |
| 83 | 1 | 0 | 2.910293  | -0.458879 | -2.997689 |
| 84 | 1 | 0 | 1.472271  | -0.652966 | -3.984926 |
| 85 | 6 | 0 | 1.663759  | 1.326285  | -3.137907 |
| 86 | 1 | 0 | 2.177431  | 1.728386  | -4.018784 |
| 87 | 1 | 0 | 0.604533  | 1.591112  | -3.199194 |
| 88 | 1 | 0 | 2.074428  | 1.819518  | -2.250323 |

### Et-*dr*-TS2

Standard orientation:

| Center Number | Atomic Number | Atomic Type | Coordinates (Angstroms) |           |           |
|---------------|---------------|-------------|-------------------------|-----------|-----------|
|               |               |             | X                       | Y         | Z         |
| 1             | 1             | 0           | 3.574741                | -1.931790 | -5.337546 |
| 2             | 6             | 0           | 2.589581                | 0.761153  | -3.525691 |
| 3             | 6             | 0           | 4.088474                | 0.912277  | -3.179625 |
| 4             | 6             | 0           | 4.569086                | -0.381606 | -2.465329 |
| 5             | 6             | 0           | 4.060101                | -1.567767 | -3.317236 |
| 6             | 6             | 0           | 2.446764                | -0.202370 | -4.722684 |
| 7             | 6             | 0           | 4.846939                | -0.269395 | -5.253654 |
| 8             | 6             | 0           | 4.907901                | 1.069400  | -4.478581 |
| 9             | 7             | 0           | 3.704946                | -1.082063 | -4.706093 |
| 10            | 1             | 0           | 5.749841                | -0.872289 | -5.124800 |
| 11            | 1             | 0           | 4.676693                | -0.143746 | -6.325668 |
| 12            | 1             | 0           | 5.950498                | 1.320314  | -4.253095 |

|    |    |   |           |           |           |
|----|----|---|-----------|-----------|-----------|
| 13 | 1  | 0 | 4.504844  | 1.888557  | -5.085867 |
| 14 | 1  | 0 | 5.673032  | -0.372664 | -2.484281 |
| 15 | 1  | 0 | 3.164091  | -2.022283 | -2.911993 |
| 16 | 1  | 0 | 2.542854  | 0.348913  | -5.663887 |
| 17 | 1  | 0 | 2.153299  | 1.731290  | -3.777419 |
| 18 | 1  | 0 | 4.239077  | 1.781940  | -2.532511 |
| 19 | 1  | 0 | 2.027040  | 0.386850  | -2.665580 |
| 20 | 7  | 0 | -0.500441 | -2.879071 | -2.197021 |
| 21 | 6  | 0 | -0.120744 | -1.687314 | -2.766633 |
| 22 | 7  | 0 | 0.836825  | -1.892094 | -3.725639 |
| 23 | 16 | 0 | -0.728665 | -0.161586 | -2.376538 |
| 24 | 6  | 0 | -1.226767 | -3.179063 | -1.009938 |
| 25 | 6  | 0 | 1.162758  | -1.066242 | -4.888741 |
| 26 | 1  | 0 | -0.222830 | -3.707581 | -2.733411 |
| 27 | 6  | 0 | -1.475966 | -4.530495 | -0.745392 |
| 28 | 6  | 0 | -2.156011 | -4.904262 | 0.396550  |
| 29 | 6  | 0 | -2.598144 | -3.944573 | 1.296555  |
| 30 | 6  | 0 | -2.351642 | -2.607180 | 1.036310  |
| 31 | 6  | 0 | -1.672165 | -2.216272 | -0.106154 |
| 32 | 1  | 0 | -2.342496 | -5.953842 | 0.586831  |
| 33 | 1  | 0 | -3.131217 | -4.239334 | 2.190181  |
| 34 | 1  | 0 | -2.694113 | -1.849930 | 1.730824  |
| 35 | 1  | 0 | -1.488227 | -1.174805 | -0.325296 |
| 36 | 1  | 0 | -1.130804 | -5.278454 | -1.446333 |
| 37 | 6  | 0 | -0.081612 | 1.042714  | -5.649825 |
| 38 | 6  | 0 | -0.050372 | -0.301561 | -5.498810 |
| 39 | 6  | 0 | -1.208587 | 1.677392  | -6.258262 |
| 40 | 7  | 0 | -2.267108 | 1.049858  | -6.714096 |
| 41 | 6  | 0 | -2.242218 | -0.347564 | -6.584649 |
| 42 | 1  | 0 | 0.719556  | 1.678441  | -5.310586 |
| 43 | 1  | 0 | 4.798571  | -2.361152 | -3.445114 |
| 44 | 1  | 0 | 1.259045  | -2.829318 | -3.746319 |
| 45 | 1  | 0 | 1.445630  | -1.801185 | -5.655593 |
| 46 | 6  | 0 | 4.157488  | -0.428934 | -0.981084 |
| 47 | 6  | 0 | 3.639122  | -1.442216 | -0.336716 |
| 48 | 1  | 0 | 3.408651  | -1.373126 | 0.717665  |
| 49 | 1  | 0 | 3.413366  | -2.392307 | -0.800413 |
| 50 | 1  | 0 | 4.370999  | 0.493190  | -0.452028 |
| 51 | 6  | 0 | -1.176689 | -1.059096 | -6.004445 |
| 52 | 6  | 0 | -1.268555 | -2.485638 | -5.965231 |
| 53 | 6  | 0 | -3.376931 | -1.053306 | -7.092967 |
| 54 | 6  | 0 | -3.434214 | -2.404424 | -7.029973 |
| 55 | 6  | 0 | -2.354432 | -3.130262 | -6.458003 |
| 56 | 1  | 0 | -1.200983 | 2.761035  | -6.352801 |
| 57 | 1  | 0 | -0.462389 | -3.063856 | -5.539217 |
| 58 | 1  | 0 | -2.403978 | -4.210974 | -6.418569 |
| 59 | 1  | 0 | -4.292056 | -2.941234 | -7.414684 |
| 60 | 1  | 0 | -4.177411 | -0.468100 | -7.527025 |
| 61 | 8  | 0 | 3.796582  | -5.359313 | -7.663308 |
| 62 | 8  | 0 | 3.508244  | -3.086320 | -6.452692 |
| 63 | 15 | 0 | 2.922196  | -4.514359 | -6.512511 |
| 64 | 6  | 0 | 5.200550  | -5.150327 | -7.823593 |
| 65 | 1  | 0 | 5.431560  | -4.083571 | -7.910243 |
| 66 | 1  | 0 | 5.489128  | -5.668030 | -8.742658 |
| 67 | 1  | 0 | 5.764366  | -5.578321 | -6.983992 |
| 68 | 8  | 0 | 1.468494  | -4.493984 | -7.298517 |
| 69 | 6  | 0 | 1.342315  | -3.931532 | -8.615380 |
| 70 | 1  | 0 | 1.766540  | -2.921786 | -8.649412 |
| 71 | 1  | 0 | 1.847556  | -4.567656 | -9.349052 |
| 72 | 1  | 0 | 0.272444  | -3.887592 | -8.833626 |
| 73 | 6  | 0 | 1.054586  | -5.769448 | -4.546870 |
| 74 | 6  | 0 | 2.476905  | -5.277155 | -4.211879 |

|    |   |   |           |           |           |
|----|---|---|-----------|-----------|-----------|
| 75 | 8 | 0 | 0.052351  | -5.153675 | -4.222405 |
| 76 | 8 | 0 | 2.541474  | -4.212505 | -3.550040 |
| 77 | 8 | 0 | 1.028721  | -6.950371 | -5.177565 |
| 78 | 6 | 0 | -0.266876 | -7.427917 | -5.590302 |
| 79 | 1 | 0 | -0.926078 | -7.538288 | -4.725389 |
| 80 | 1 | 0 | -0.706138 | -6.725865 | -6.303289 |
| 81 | 1 | 0 | -0.080182 | -8.392638 | -6.062603 |
| 82 | 6 | 0 | 3.533820  | -6.368921 | -4.027707 |
| 83 | 1 | 0 | 3.202397  | -6.959626 | -3.157709 |
| 84 | 1 | 0 | 3.531388  | -7.051441 | -4.881534 |
| 85 | 6 | 0 | 4.933063  | -5.817007 | -3.755556 |
| 86 | 1 | 0 | 4.934024  | -5.173854 | -2.870099 |
| 87 | 1 | 0 | 5.642007  | -6.636420 | -3.589634 |
| 88 | 1 | 0 | 5.295927  | -5.221770 | -4.602551 |

## Et-*mr*-TS2

Standard orientation:

| Center Number | Atomic Number | Atomic Type | Coordinates (Angstroms) |           |           |
|---------------|---------------|-------------|-------------------------|-----------|-----------|
|               |               |             | X                       | Y         | Z         |
| 1             | 6             | 0           | 1.037148                | -0.363247 | -1.879694 |
| 2             | 6             | 0           | 1.465112                | -1.596023 | -1.064712 |
| 3             | 8             | 0           | 0.548991                | -2.096693 | -0.369634 |
| 4             | 8             | 0           | 2.206492                | 1.138139  | 1.006933  |
| 5             | 15            | 0           | 2.801653                | -0.195672 | 0.511059  |
| 6             | 8             | 0           | 2.899228                | -1.258223 | 1.769380  |
| 7             | 6             | 0           | 3.540488                | -0.871266 | 2.996090  |
| 8             | 1             | 0           | 3.322172                | -1.659349 | 3.721777  |
| 9             | 1             | 0           | 4.622750                | -0.791561 | 2.850586  |
| 10            | 1             | 0           | 3.147795                | 0.085719  | 3.356892  |
| 11            | 8             | 0           | 4.447535                | 0.021124  | 0.278545  |
| 12            | 6             | 0           | 4.930402                | 1.188519  | -0.386448 |
| 13            | 1             | 0           | 6.020048                | 1.102092  | -0.417128 |
| 14            | 1             | 0           | 4.650613                | 2.094019  | 0.162873  |
| 15            | 1             | 0           | 4.548837                | 1.251646  | -1.414405 |
| 16            | 7             | 0           | 0.502233                | 3.193297  | 0.030473  |
| 17            | 6             | 0           | -0.717278               | 2.700840  | 0.417757  |
| 18            | 7             | 0           | -0.579822               | 1.549024  | 1.143927  |
| 19            | 16            | 0           | -2.224702               | 3.388517  | 0.042466  |
| 20            | 6             | 0           | 0.875762                | 4.337447  | -0.727427 |
| 21            | 6             | 0           | -1.600857               | 0.824981  | 1.903037  |
| 22            | 6             | 0           | -2.656353               | 0.169085  | 0.973427  |
| 23            | 6             | 0           | -3.933168               | -0.387413 | 1.643743  |
| 24            | 6             | 0           | -4.384941               | -1.669806 | 0.914320  |
| 25            | 7             | 0           | -2.034864               | -1.000812 | 0.202677  |
| 26            | 6             | 0           | -2.865719               | -1.249563 | -1.033307 |
| 27            | 6             | 0           | -4.351669               | -1.451384 | -0.629455 |
| 28            | 6             | 0           | -1.963606               | -2.266066 | 1.029770  |
| 29            | 6             | 0           | -3.393490               | -2.791797 | 1.267611  |
| 30            | 1             | 0           | 1.300057                | 2.605188  | 0.325268  |
| 31            | 6             | 0           | -2.161490               | 1.663119  | 3.089637  |
| 32            | 1             | 0           | -1.044734               | -0.004584 | 2.348329  |
| 33            | 1             | 0           | -4.716647               | 0.373090  | 1.604052  |
| 34            | 1             | 0           | -3.758229               | -0.611111 | 2.704762  |
| 35            | 1             | 0           | -2.441825               | -2.136580 | -1.508676 |
| 36            | 1             | 0           | -2.692818               | -0.403795 | -1.695551 |
| 37            | 6             | 0           | -5.358734               | -0.371095 | -1.074079 |
| 38            | 1             | 0           | -4.691349               | -2.394283 | -1.086356 |
| 39            | 1             | 0           | -1.317706               | -2.951741 | 0.484745  |
| 40            | 1             | 0           | -1.448938               | -2.012581 | 1.957761  |

|    |   |   |           |           |           |
|----|---|---|-----------|-----------|-----------|
| 41 | 1 | 0 | -3.509867 | -3.090410 | 2.315547  |
| 42 | 1 | 0 | -5.398284 | -1.943057 | 1.225876  |
| 43 | 1 | 0 | -3.586807 | -3.681918 | 0.656850  |
| 44 | 1 | 0 | 0.390391  | 1.230300  | 1.272870  |
| 45 | 1 | 0 | -1.069285 | -0.791576 | -0.132808 |
| 46 | 6 | 0 | -0.022592 | 5.261580  | -1.258747 |
| 47 | 6 | 0 | 0.449094  | 6.345254  | -1.982337 |
| 48 | 6 | 0 | 1.805244  | 6.528836  | -2.188883 |
| 49 | 6 | 0 | 2.702366  | 5.610943  | -1.659428 |
| 50 | 6 | 0 | 2.247843  | 4.526619  | -0.936699 |
| 51 | 1 | 0 | 2.946583  | 3.813737  | -0.520769 |
| 52 | 1 | 0 | 3.766468  | 5.742619  | -1.810689 |
| 53 | 1 | 0 | 2.163563  | 7.378085  | -2.754562 |
| 54 | 1 | 0 | -0.259669 | 7.055982  | -2.389168 |
| 55 | 1 | 0 | -1.077869 | 5.105881  | -1.088513 |
| 56 | 6 | 0 | -3.295002 | 2.396761  | 2.996468  |
| 57 | 6 | 0 | -3.759510 | 3.152220  | 4.117420  |
| 58 | 7 | 0 | -3.160607 | 3.202649  | 5.285092  |
| 59 | 6 | 0 | -1.969896 | 2.468065  | 5.388521  |
| 60 | 6 | 0 | -1.430511 | 1.703636  | 4.337691  |
| 61 | 6 | 0 | -1.291561 | 2.530601  | 6.646288  |
| 62 | 6 | 0 | -0.124869 | 1.871148  | 6.835548  |
| 63 | 6 | 0 | 0.436017  | 1.111595  | 5.772410  |
| 64 | 6 | 0 | -0.189998 | 1.029927  | 4.573316  |
| 65 | 1 | 0 | -3.861310 | 2.444272  | 2.078886  |
| 66 | 1 | 0 | -4.677646 | 3.725677  | 4.010771  |
| 67 | 1 | 0 | 0.271657  | 0.460475  | 3.780176  |
| 68 | 1 | 0 | 1.377394  | 0.599193  | 5.927267  |
| 69 | 1 | 0 | 0.392684  | 1.919777  | 7.785105  |
| 70 | 1 | 0 | -1.743660 | 3.125632  | 7.429574  |
| 71 | 1 | 0 | -2.923249 | 0.899122  | 0.210363  |
| 72 | 6 | 0 | -5.126268 | 0.736124  | -1.729888 |
| 73 | 1 | 0 | -6.374856 | -0.620649 | -0.789652 |
| 74 | 1 | 0 | -5.934280 | 1.406673  | -1.989327 |
| 75 | 1 | 0 | -4.144125 | 1.055809  | -2.049157 |
| 76 | 6 | 0 | 1.572477  | 1.224183  | -3.549692 |
| 77 | 1 | 0 | 1.331484  | 2.070003  | -2.901199 |
| 78 | 1 | 0 | 2.441245  | 1.442543  | -4.171291 |
| 79 | 1 | 0 | 0.705167  | 0.983292  | -4.170056 |
| 80 | 8 | 0 | -0.072479 | 0.132439  | -1.761550 |
| 81 | 8 | 0 | 1.951176  | 0.078382  | -2.757653 |
| 82 | 6 | 0 | 2.567674  | -2.469538 | -1.662914 |
| 83 | 1 | 0 | 2.146805  | -2.871250 | -2.600773 |
| 84 | 1 | 0 | 3.425367  | -1.855362 | -1.950123 |
| 85 | 6 | 0 | 2.992885  | -3.626536 | -0.757215 |
| 86 | 1 | 0 | 2.134762  | -4.253434 | -0.495160 |
| 87 | 1 | 0 | 3.736555  | -4.249966 | -1.267443 |
| 88 | 1 | 0 | 3.430928  | -3.254186 | 0.173811  |

*i*Pr- $\alpha$ -ketoester

Standard orientation:

| Center Number | Atomic Number | Atomic Type | Coordinates (Angstroms) |           |          |
|---------------|---------------|-------------|-------------------------|-----------|----------|
|               |               |             | X                       | Y         | Z        |
| 1             | 6             | 0           | 2.954445                | 1.004655  | 1.623215 |
| 2             | 6             | 0           | 2.611767                | -0.475320 | 1.320931 |
| 3             | 8             | 0           | 2.149189                | 1.820744  | 2.006078 |
| 4             | 8             | 0           | 1.617050                | -0.700548 | 0.664633 |
| 5             | 8             | 0           | 4.255734                | 1.258972  | 1.380346 |
| 6             | 6             | 0           | 4.678177                | 2.628738  | 1.565401 |

|    |   |   |          |           |          |
|----|---|---|----------|-----------|----------|
| 7  | 1 | 0 | 4.105308 | 3.289130  | 0.909770 |
| 8  | 1 | 0 | 4.530353 | 2.929519  | 2.605610 |
| 9  | 1 | 0 | 5.735720 | 2.641459  | 1.302749 |
| 10 | 6 | 0 | 3.528146 | -1.544381 | 1.897877 |
| 11 | 1 | 0 | 4.545157 | -1.288978 | 1.566981 |
| 12 | 6 | 0 | 3.153774 | -2.939401 | 1.390437 |
| 13 | 1 | 0 | 3.853692 | -3.682752 | 1.788837 |
| 14 | 1 | 0 | 2.141633 | -3.214952 | 1.705456 |
| 15 | 1 | 0 | 3.183106 | -2.988034 | 0.297209 |
| 16 | 6 | 0 | 3.508550 | -1.460159 | 3.442078 |
| 17 | 1 | 0 | 4.211039 | -2.189532 | 3.859790 |
| 18 | 1 | 0 | 3.801269 | -0.469400 | 3.808088 |
| 19 | 1 | 0 | 2.509760 | -1.687700 | 3.832802 |

-----  
*iPr-ds-TS2*

Standard orientation:

| Center<br>Number | Atomic<br>Number | Atomic<br>Type | Coordinates (Angstroms) |           |           |
|------------------|------------------|----------------|-------------------------|-----------|-----------|
|                  |                  |                | X                       | Y         | Z         |
| 1                | 7                | 0              | -0.324882               | 2.638125  | -0.163738 |
| 2                | 6                | 0              | -1.261691               | 1.663048  | -0.381527 |
| 3                | 7                | 0              | -0.915576               | 0.483737  | 0.210504  |
| 4                | 16               | 0              | -2.683259               | 1.848483  | -1.296646 |
| 5                | 6                | 0              | -0.214395               | 3.987655  | -0.613779 |
| 6                | 6                | 0              | -1.740124               | -0.709613 | 0.407405  |
| 7                | 6                | 0              | -2.001487               | -1.459744 | -0.916033 |
| 8                | 6                | 0              | -2.865647               | -2.737462 | -0.805866 |
| 9                | 6                | 0              | -2.305244               | -3.822910 | -1.747809 |
| 10               | 7                | 0              | -0.677687               | -1.880273 | -1.549655 |
| 11               | 6                | 0              | -0.916898               | -2.156759 | -3.011495 |
| 12               | 6                | 0              | -2.040200               | -3.219768 | -3.162366 |
| 13               | 6                | 0              | -0.068366               | -3.098826 | -0.898263 |
| 14               | 6                | 0              | -0.970775               | -4.321854 | -1.165600 |
| 15               | 1                | 0              | 0.452275                | 2.355452  | 0.443519  |
| 16               | 6                | 0              | -2.992956               | -0.423094 | 1.280508  |
| 17               | 1                | 0              | -1.091499               | -1.358761 | 1.000386  |
| 18               | 1                | 0              | -3.900576               | -2.499972 | -1.066088 |
| 19               | 1                | 0              | -2.874038               | -3.115280 | 0.225690  |
| 20               | 1                | 0              | 0.037113                | -2.496286 | -3.418851 |
| 21               | 1                | 0              | -1.151607               | -1.199352 | -3.474821 |
| 22               | 6                | 0              | -3.352071               | -2.770873 | -3.838493 |
| 23               | 1                | 0              | -1.641431               | -4.037707 | -3.782972 |
| 24               | 1                | 0              | 0.931071                | -3.192758 | -1.324873 |
| 25               | 1                | 0              | 0.059797                | -2.865990 | 0.158886  |
| 26               | 1                | 0              | -1.145294               | -4.869434 | -0.232572 |
| 27               | 1                | 0              | -3.015043               | -4.652487 | -1.830723 |
| 28               | 1                | 0              | -0.487358               | -5.019023 | -1.860675 |
| 29               | 1                | 0              | 0.005035                | 0.387857  | 0.662562  |
| 30               | 6                | 0              | -1.142552               | 4.618298  | -1.438784 |
| 31               | 6                | 0              | -0.940788               | 5.935768  | -1.819595 |
| 32               | 6                | 0              | 0.171708                | 6.638546  | -1.391080 |
| 33               | 6                | 0              | 1.096862                | 6.010696  | -0.567714 |
| 34               | 6                | 0              | 0.910672                | 4.699128  | -0.180275 |
| 35               | 1                | 0              | -1.669037               | 6.416316  | -2.461179 |
| 36               | 1                | 0              | 0.319961                | 7.666464  | -1.693139 |
| 37               | 1                | 0              | 1.971523                | 6.549216  | -0.225099 |
| 38               | 1                | 0              | 1.630075                | 4.206762  | 0.460188  |
| 39               | 1                | 0              | -2.007360               | 4.057254  | -1.761882 |
| 40               | 1                | 0              | 0.068271                | -1.139074 | -1.497112 |
| 41               | 6                | 0              | -2.824117               | -0.269217 | 2.708738  |

|    |    |   |           |           |           |
|----|----|---|-----------|-----------|-----------|
| 42 | 6  | 0 | -3.970419 | -0.010957 | 3.480857  |
| 43 | 7  | 0 | -5.259229 | 0.115211  | 2.940094  |
| 44 | 6  | 0 | -5.343465 | -0.013305 | 1.635818  |
| 45 | 6  | 0 | -4.237562 | -0.281223 | 0.769751  |
| 46 | 6  | 0 | -1.564536 | -0.355398 | 3.383812  |
| 47 | 1  | 0 | -4.428586 | -0.352315 | -0.290344 |
| 48 | 6  | 0 | -3.678538 | -1.580881 | -4.271374 |
| 49 | 1  | 0 | -4.637360 | -1.404515 | -4.739454 |
| 50 | 1  | 0 | -3.036933 | -0.714234 | -4.197531 |
| 51 | 1  | 0 | -4.053644 | -3.590031 | -3.952159 |
| 52 | 1  | 0 | -2.437819 | -0.757152 | -1.625941 |
| 53 | 6  | 0 | -3.854049 | 0.141592  | 4.898304  |
| 54 | 6  | 0 | -2.647713 | 0.047993  | 5.504973  |
| 55 | 6  | 0 | -1.483226 | -0.202176 | 4.727908  |
| 56 | 1  | 0 | -6.332584 | 0.090685  | 1.195185  |
| 57 | 1  | 0 | -4.760041 | 0.336261  | 5.457946  |
| 58 | 1  | 0 | -2.555856 | 0.165517  | 6.577216  |
| 59 | 1  | 0 | -0.522525 | -0.266548 | 5.223289  |
| 60 | 1  | 0 | -0.661191 | -0.533234 | 2.816245  |
| 61 | 6  | 0 | 2.882076  | 0.954543  | 1.423516  |
| 62 | 6  | 0 | 2.507345  | -0.529791 | 1.240603  |
| 63 | 8  | 0 | 2.067577  | 1.864454  | 1.370628  |
| 64 | 8  | 0 | 1.271797  | -0.798823 | 1.309408  |
| 65 | 8  | 0 | 4.189271  | 1.158786  | 1.639894  |
| 66 | 6  | 0 | 4.630002  | 2.529931  | 1.672401  |
| 67 | 1  | 0 | 4.446550  | 2.997560  | 0.701686  |
| 68 | 1  | 0 | 4.105335  | 3.081165  | 2.456958  |
| 69 | 1  | 0 | 5.699196  | 2.482346  | 1.880753  |
| 70 | 8  | 0 | 1.683286  | -0.669889 | -1.882074 |
| 71 | 15 | 0 | 2.954672  | -0.357358 | -1.085395 |
| 72 | 8  | 0 | 4.190863  | -1.361074 | -1.541402 |
| 73 | 6  | 0 | 4.629135  | -1.409693 | -2.907705 |
| 74 | 1  | 0 | 5.377177  | -2.204361 | -2.968469 |
| 75 | 1  | 0 | 5.085394  | -0.456117 | -3.196156 |
| 76 | 1  | 0 | 3.793198  | -1.639262 | -3.578704 |
| 77 | 8  | 0 | 3.532518  | 1.121405  | -1.591221 |
| 78 | 6  | 0 | 2.869247  | 1.883252  | -2.613187 |
| 79 | 1  | 0 | 3.046546  | 1.444761  | -3.602036 |
| 80 | 1  | 0 | 1.792007  | 1.936739  | -2.434452 |
| 81 | 1  | 0 | 3.303014  | 2.886196  | -2.576736 |
| 82 | 6  | 0 | 3.533810  | -1.559276 | 1.759905  |
| 83 | 1  | 0 | 4.527619  | -1.279623 | 1.397689  |
| 84 | 6  | 0 | 3.208790  | -2.979653 | 1.282875  |
| 85 | 1  | 0 | 3.938217  | -3.688092 | 1.694307  |
| 86 | 1  | 0 | 2.211585  | -3.282873 | 1.620798  |
| 87 | 1  | 0 | 3.250927  | -3.055091 | 0.191650  |
| 88 | 6  | 0 | 3.539930  | -1.506727 | 3.304024  |
| 89 | 1  | 0 | 4.272187  | -2.221646 | 3.699031  |
| 90 | 1  | 0 | 3.809936  | -0.514048 | 3.680158  |
| 91 | 1  | 0 | 2.554245  | -1.771560 | 3.703985  |

*iPr-ms-TS2*

Standard orientation:

| Center Number | Atomic Number | Atomic Type | Coordinates (Angstroms) |           |           |
|---------------|---------------|-------------|-------------------------|-----------|-----------|
|               |               |             | X                       | Y         | Z         |
| 1             | 6             | 0           | 1.186080                | -2.037008 | -2.039249 |
| 2             | 6             | 0           | 1.083592                | -0.499685 | -1.945528 |
| 3             | 8             | 0           | 0.012658                | -0.054747 | -1.472533 |
| 4             | 8             | 0           | 2.330287                | -2.482244 | -2.577422 |

|    |    |   |           |           |           |
|----|----|---|-----------|-----------|-----------|
| 5  | 6  | 0 | 2.497982  | -3.911512 | -2.626906 |
| 6  | 1  | 0 | 2.474303  | -4.323869 | -1.614811 |
| 7  | 1  | 0 | 1.708274  | -4.368875 | -3.229056 |
| 8  | 1  | 0 | 3.474925  | -4.069807 | -3.084458 |
| 9  | 8  | 0 | 0.280672  | -2.776808 | -1.692238 |
| 10 | 8  | 0 | 2.044807  | 0.791514  | 0.975947  |
| 11 | 15 | 0 | 2.566124  | -0.398827 | 0.144843  |
| 12 | 8  | 0 | 2.259729  | -1.819051 | 0.960731  |
| 13 | 6  | 0 | 2.746132  | -2.010008 | 2.298624  |
| 14 | 1  | 0 | 2.335735  | -2.961258 | 2.649656  |
| 15 | 1  | 0 | 3.839846  | -2.056288 | 2.305279  |
| 16 | 1  | 0 | 2.413140  | -1.198199 | 2.956203  |
| 17 | 8  | 0 | 4.238335  | -0.409140 | 0.296954  |
| 18 | 6  | 0 | 4.964730  | 0.815588  | 0.425613  |
| 19 | 1  | 0 | 5.981280  | 0.545244  | 0.725477  |
| 20 | 1  | 0 | 4.512443  | 1.464027  | 1.182558  |
| 21 | 1  | 0 | 5.009547  | 1.351459  | -0.532481 |
| 22 | 7  | 0 | 0.434557  | 3.048769  | 0.037608  |
| 23 | 6  | 0 | -0.782482 | 2.603481  | 0.484234  |
| 24 | 7  | 0 | -0.639745 | 1.484914  | 1.259097  |
| 25 | 16 | 0 | -2.290544 | 3.299304  | 0.143671  |
| 26 | 6  | 0 | 0.804192  | 4.114724  | -0.827555 |
| 27 | 6  | 0 | -1.653749 | 0.803177  | 2.053650  |
| 28 | 6  | 0 | -2.664726 | 0.021661  | 1.179768  |
| 29 | 6  | 0 | -3.687216 | -0.830540 | 1.970667  |
| 30 | 6  | 0 | -3.888583 | -2.190221 | 1.270985  |
| 31 | 7  | 0 | -1.935626 | -0.930722 | 0.238733  |
| 32 | 6  | 0 | -2.878973 | -1.353537 | -0.862730 |
| 33 | 6  | 0 | -4.163097 | -1.971176 | -0.247717 |
| 34 | 6  | 0 | -1.404373 | -2.157023 | 0.945189  |
| 35 | 6  | 0 | -2.596769 | -3.013528 | 1.424361  |
| 36 | 1  | 0 | 1.218976  | 2.436707  | 0.307546  |
| 37 | 6  | 0 | -2.299387 | 1.723062  | 3.131173  |
| 38 | 1  | 0 | -1.085247 | 0.046853  | 2.607561  |
| 39 | 1  | 0 | -4.636858 | -0.293427 | 2.040893  |
| 40 | 1  | 0 | -3.338876 | -0.995550 | 2.999727  |
| 41 | 1  | 0 | -2.320807 | -2.064279 | -1.474038 |
| 42 | 1  | 0 | -3.061335 | -0.465396 | -1.466348 |
| 43 | 6  | 0 | -5.490132 | -1.219522 | -0.478953 |
| 44 | 1  | 0 | -4.295566 | -2.970284 | -0.691694 |
| 45 | 1  | 0 | -0.759045 | -2.663053 | 0.227725  |
| 46 | 1  | 0 | -0.775979 | -1.811862 | 1.766698  |
| 47 | 1  | 0 | -2.453829 | -3.302574 | 2.471888  |
| 48 | 1  | 0 | -4.731492 | -2.722210 | 1.724355  |
| 49 | 1  | 0 | -2.662959 | -3.940394 | 0.842251  |
| 50 | 1  | 0 | 0.315413  | 1.100031  | 1.307235  |
| 51 | 1  | 0 | -1.128647 | -0.471733 | -0.255846 |
| 52 | 6  | 0 | -0.093019 | 5.036137  | -1.365311 |
| 53 | 6  | 0 | 0.369679  | 6.045434  | -2.194260 |
| 54 | 6  | 0 | 1.715529  | 6.157562  | -2.498158 |
| 55 | 6  | 0 | 2.611241  | 5.243090  | -1.960845 |
| 56 | 6  | 0 | 2.165724  | 4.231367  | -1.134285 |
| 57 | 1  | 0 | 2.864315  | 3.521199  | -0.712613 |
| 58 | 1  | 0 | 3.667197  | 5.320024  | -2.187965 |
| 59 | 1  | 0 | 2.066936  | 6.949387  | -3.145531 |
| 60 | 1  | 0 | -0.337392 | 6.754681  | -2.606637 |
| 61 | 1  | 0 | -1.140196 | 4.934727  | -1.119320 |
| 62 | 6  | 0 | -3.560858 | 2.203379  | 3.040606  |
| 63 | 6  | 0 | -4.091316 | 3.033442  | 4.076818  |
| 64 | 7  | 0 | -3.438308 | 3.389993  | 5.158915  |
| 65 | 6  | 0 | -2.121493 | 2.915417  | 5.256455  |
| 66 | 6  | 0 | -1.513802 | 2.100024  | 4.285301  |

|    |   |   |           |           |           |
|----|---|---|-----------|-----------|-----------|
| 67 | 6 | 0 | -1.385624 | 3.305983  | 6.419170  |
| 68 | 6 | 0 | -0.103898 | 2.906162  | 6.591097  |
| 69 | 6 | 0 | 0.520734  | 2.092195  | 5.606320  |
| 70 | 6 | 0 | -0.155620 | 1.703230  | 4.498294  |
| 71 | 1 | 0 | -4.193750 | 1.989879  | 2.192878  |
| 72 | 1 | 0 | -5.110759 | 3.399071  | 3.975464  |
| 73 | 1 | 0 | 0.347947  | 1.099891  | 3.757187  |
| 74 | 1 | 0 | 1.550230  | 1.787449  | 5.747363  |
| 75 | 1 | 0 | 0.456562  | 3.203058  | 7.468427  |
| 76 | 1 | 0 | -1.889962 | 3.931018  | 7.145042  |
| 77 | 1 | 0 | -3.163671 | 0.732907  | 0.521278  |
| 78 | 6 | 0 | -5.682649 | -0.077138 | -1.085496 |
| 79 | 1 | 0 | -6.339402 | -1.757430 | -0.072229 |
| 80 | 1 | 0 | -6.676505 | 0.337127  | -1.186419 |
| 81 | 1 | 0 | -4.890799 | 0.517913  | -1.518081 |
| 82 | 6 | 0 | 1.832539  | 0.409779  | -2.940408 |
| 83 | 1 | 0 | 1.746867  | 1.402525  | -2.483109 |
| 84 | 6 | 0 | 1.002641  | 0.435174  | -4.245533 |
| 85 | 1 | 0 | 1.437993  | 1.155788  | -4.948150 |
| 86 | 1 | 0 | 1.005230  | -0.547581 | -4.735848 |
| 87 | 1 | 0 | -0.033628 | 0.726232  | -4.049406 |
| 88 | 6 | 0 | 3.311350  | 0.141209  | -3.253550 |
| 89 | 1 | 0 | 3.905142  | -0.024489 | -2.350488 |
| 90 | 1 | 0 | 3.440981  | -0.732320 | -3.898421 |
| 91 | 1 | 0 | 3.721891  | 1.011859  | -3.780614 |

*iPr-dr-TS2*

Standard orientation:

| Center Number | Atomic Number | Atomic Type | Coordinates (Angstroms) |           |           |
|---------------|---------------|-------------|-------------------------|-----------|-----------|
|               |               |             | X                       | Y         | Z         |
| 1             | 1             | 0           | 3.584429                | -1.947873 | -5.319771 |
| 2             | 6             | 0           | 2.581661                | 0.753136  | -3.527768 |
| 3             | 6             | 0           | 4.077862                | 0.907025  | -3.171604 |
| 4             | 6             | 0           | 4.554346                | -0.383175 | -2.448058 |
| 5             | 6             | 0           | 4.052643                | -1.573647 | -3.298254 |
| 6             | 6             | 0           | 2.447947                | -0.216011 | -4.721440 |
| 7             | 6             | 0           | 4.851765                | -0.283257 | -5.234902 |
| 8             | 6             | 0           | 4.906470                | 1.058958  | -4.465314 |
| 9             | 7             | 0           | 3.706453                | -1.094548 | -4.691797 |
| 10            | 1             | 0           | 5.753980                | -0.885215 | -5.097395 |
| 11            | 1             | 0           | 4.688880                | -0.162387 | -6.308614 |
| 12            | 1             | 0           | 5.947302                | 1.311396  | -4.233464 |
| 13            | 1             | 0           | 4.507377                | 1.875244  | -5.079066 |
| 14            | 1             | 0           | 5.658385                | -0.373379 | -2.458972 |
| 15            | 1             | 0           | 3.154524                | -2.027786 | -2.897354 |
| 16            | 1             | 0           | 2.550462                | 0.330997  | -5.664459 |
| 17            | 1             | 0           | 2.146312                | 1.721749  | -3.786777 |
| 18            | 1             | 0           | 4.223065                | 1.779743  | -2.527370 |
| 19            | 1             | 0           | 2.013326                | 0.382093  | -2.670043 |
| 20            | 7             | 0           | -0.507733               | -2.882590 | -2.197789 |
| 21            | 6             | 0           | -0.129304               | -1.693221 | -2.773175 |
| 22            | 7             | 0           | 0.832360                | -1.901318 | -3.727173 |
| 23            | 16            | 0           | -0.742723               | -0.166559 | -2.394789 |
| 24            | 6             | 0           | -1.239133               | -3.177305 | -1.012496 |
| 25            | 6             | 0           | 1.164271                | -1.079800 | -4.891374 |
| 26            | 1             | 0           | -0.224751               | -3.713872 | -2.727292 |
| 27            | 6             | 0           | -1.483730               | -4.527942 | -0.739642 |
| 28            | 6             | 0           | -2.168438               | -4.896556 | 0.401179  |
| 29            | 6             | 0           | -2.619877               | -3.932445 | 1.291811  |



|    |    |   |           |           |           |
|----|----|---|-----------|-----------|-----------|
| 30 | 6  | 0 | -2.377936 | -2.595862 | 1.023332  |
| 31 | 6  | 0 | -1.693874 | -2.210090 | -0.118145 |
| 32 | 1  | 0 | -2.351265 | -5.945574 | 0.597984  |
| 33 | 1  | 0 | -3.156585 | -4.223208 | 2.184571  |
| 34 | 1  | 0 | -2.727670 | -1.835212 | 1.710469  |
| 35 | 1  | 0 | -1.513292 | -1.169428 | -0.343848 |
| 36 | 1  | 0 | -1.131265 | -5.279303 | -1.433287 |
| 37 | 6  | 0 | -0.070897 | 1.027745  | -5.671467 |
| 38 | 6  | 0 | -0.045350 | -0.315387 | -5.509391 |
| 39 | 6  | 0 | -1.194707 | 1.662231  | -6.285912 |
| 40 | 7  | 0 | -2.255680 | 1.035601  | -6.737166 |
| 41 | 6  | 0 | -2.236593 | -0.360859 | -6.596656 |
| 42 | 1  | 0 | 0.732444  | 1.663084  | -5.336796 |
| 43 | 1  | 0 | 4.793068  | -2.366398 | -3.418129 |
| 44 | 1  | 0 | 1.257568  | -2.837824 | -3.740416 |
| 45 | 1  | 0 | 1.449267  | -1.817682 | -5.654767 |
| 46 | 6  | 0 | 4.132009  | -0.423986 | -0.966628 |
| 47 | 6  | 0 | 3.608482  | -1.434174 | -0.321579 |
| 48 | 1  | 0 | 3.370385  | -1.360315 | 0.730783  |
| 49 | 1  | 0 | 3.385583  | -2.386175 | -0.782716 |
| 50 | 1  | 0 | 4.342099  | 0.500359  | -0.440084 |
| 51 | 6  | 0 | -1.174194 | -1.072294 | -6.010575 |
| 52 | 6  | 0 | -1.271692 | -2.498149 | -5.961186 |
| 53 | 6  | 0 | -3.374145 | -1.065705 | -7.099795 |
| 54 | 6  | 0 | -3.437118 | -2.416043 | -7.026428 |
| 55 | 6  | 0 | -2.360239 | -3.141949 | -6.449178 |
| 56 | 1  | 0 | -1.182374 | 2.745033  | -6.389208 |
| 57 | 1  | 0 | -0.467253 | -3.076437 | -5.532014 |
| 58 | 1  | 0 | -2.414196 | -4.222119 | -6.401832 |
| 59 | 1  | 0 | -4.297195 | -2.952192 | -7.407051 |
| 60 | 1  | 0 | -4.172090 | -0.480468 | -7.538442 |
| 61 | 8  | 0 | 3.769124  | -5.387546 | -7.654603 |
| 62 | 8  | 0 | 3.555067  | -3.117384 | -6.423685 |
| 63 | 15 | 0 | 2.932358  | -4.529363 | -6.487209 |
| 64 | 6  | 0 | 5.168059  | -5.187880 | -7.866957 |
| 65 | 1  | 0 | 5.407242  | -4.121644 | -7.933813 |
| 66 | 1  | 0 | 5.413005  | -5.682943 | -8.810912 |
| 67 | 1  | 0 | 5.759501  | -5.645096 | -7.062915 |
| 68 | 8  | 0 | 1.467959  | -4.461457 | -7.252961 |
| 69 | 6  | 0 | 1.342866  | -3.888275 | -8.565090 |
| 70 | 1  | 0 | 1.806022  | -2.895808 | -8.602182 |
| 71 | 1  | 0 | 1.811043  | -4.540243 | -9.309420 |
| 72 | 1  | 0 | 0.272272  | -3.801277 | -8.766287 |
| 73 | 6  | 0 | 1.052902  | -5.773444 | -4.549195 |
| 74 | 6  | 0 | 2.473797  | -5.282832 | -4.195674 |
| 75 | 8  | 0 | 0.047610  | -5.171381 | -4.209151 |
| 76 | 8  | 0 | 2.527372  | -4.215356 | -3.535534 |
| 77 | 8  | 0 | 1.031983  | -6.929234 | -5.225825 |
| 78 | 6  | 0 | -0.259284 | -7.388337 | -5.670891 |
| 79 | 1  | 0 | -0.932443 | -7.520765 | -4.819899 |
| 80 | 1  | 0 | -0.683953 | -6.663319 | -6.369640 |
| 81 | 1  | 0 | -0.070009 | -8.339562 | -6.168916 |
| 82 | 6  | 0 | 3.536979  | -6.376371 | -3.984609 |
| 83 | 1  | 0 | 3.512145  | -7.057515 | -4.841306 |
| 84 | 6  | 0 | 4.939846  | -5.775286 | -3.845761 |
| 85 | 1  | 0 | 4.993715  | -5.117558 | -2.971475 |
| 86 | 1  | 0 | 5.683098  | -6.572202 | -3.722399 |
| 87 | 1  | 0 | 5.217376  | -5.184814 | -4.726467 |
| 88 | 6  | 0 | 3.170950  | -7.179647 | -2.715975 |
| 89 | 1  | 0 | 2.190587  | -7.661157 | -2.804630 |
| 90 | 1  | 0 | 3.912579  | -7.969760 | -2.546798 |
| 91 | 1  | 0 | 3.157830  | -6.529438 | -1.833554 |

-----  
***iPr-mr-TS2***

Standard orientation:

| Center<br>Number | Atomic<br>Number | Atomic<br>Type | Coordinates (Angstroms) |           |           |
|------------------|------------------|----------------|-------------------------|-----------|-----------|
|                  |                  |                | X                       | Y         | Z         |
| 1                | 6                | 0              | 1.164315                | -0.459096 | -1.788644 |
| 2                | 6                | 0              | 1.504653                | -1.633849 | -0.858873 |
| 3                | 8                | 0              | 0.577289                | -1.993080 | -0.108212 |
| 4                | 8                | 0              | 2.381069                | 1.571787  | 0.762418  |
| 5                | 15               | 0              | 2.927830                | 0.142347  | 0.545088  |
| 6                | 8                | 0              | 2.990957                | -0.638377 | 2.004819  |
| 7                | 6                | 0              | 3.621068                | -0.011871 | 3.135357  |
| 8                | 1                | 0              | 3.421052                | -0.653899 | 3.997389  |
| 9                | 1                | 0              | 4.701264                | 0.065897  | 2.973985  |
| 10               | 1                | 0              | 3.203439                | 0.985694  | 3.309972  |
| 11               | 8                | 0              | 4.585764                | 0.275435  | 0.294722  |
| 12               | 6                | 0              | 5.090587                | 1.297499  | -0.563604 |
| 13               | 1                | 0              | 6.181222                | 1.219921  | -0.536723 |
| 14               | 1                | 0              | 4.784682                | 2.289617  | -0.213901 |
| 15               | 1                | 0              | 4.749367                | 1.155544  | -1.598476 |
| 16               | 7                | 0              | 0.562280                | 3.494168  | -0.239815 |
| 17               | 6                | 0              | -0.605882               | 3.013413  | 0.287124  |
| 18               | 7                | 0              | -0.377613               | 1.934688  | 1.084928  |
| 19               | 16               | 0              | -2.162864               | 3.657476  | -0.026534 |
| 20               | 6                | 0              | 0.858281                | 4.611176  | -1.070292 |
| 21               | 6                | 0              | -1.300157               | 1.062403  | 1.821349  |
| 22               | 6                | 0              | -2.413918               | 0.473365  | 0.896986  |
| 23               | 6                | 0              | -3.792548               | 0.186917  | 1.531434  |
| 24               | 6                | 0              | -4.410274               | -1.065640 | 0.877872  |
| 25               | 7                | 0              | -1.958293               | -0.832742 | 0.241025  |
| 26               | 6                | 0              | -2.770281               | -1.045800 | -1.014305 |
| 27               | 6                | 0              | -4.284020               | -0.988624 | -0.673882 |
| 28               | 6                | 0              | -2.116107               | -2.020365 | 1.159411  |
| 29               | 6                | 0              | -3.620537               | -2.294006 | 1.369835  |
| 30               | 1                | 0              | 1.392747                | 2.932253  | 0.017486  |
| 31               | 6                | 0              | -1.817491               | 1.693627  | 3.149271  |
| 32               | 1                | 0              | -0.654173               | 0.225643  | 2.091367  |
| 33               | 1                | 0              | -4.424147               | 1.069076  | 1.390015  |
| 34               | 1                | 0              | -3.710243               | 0.025204  | 2.613541  |
| 35               | 1                | 0              | -2.473071               | -2.021222 | -1.406619 |
| 36               | 1                | 0              | -2.441598               | -0.288540 | -1.722363 |
| 37               | 6                | 0              | -5.094694               | 0.188568  | -1.252488 |
| 38               | 1                | 0              | -4.745388               | -1.906305 | -1.072025 |
| 39               | 1                | 0              | -1.573378               | -2.845350 | 0.697565  |
| 40               | 1                | 0              | -1.599887               | -1.775142 | 2.088634  |
| 41               | 1                | 0              | -3.818876               | -2.476502 | 2.431850  |
| 42               | 1                | 0              | -5.464767               | -1.156914 | 1.157513  |
| 43               | 1                | 0              | -3.932098               | -3.193786 | 0.825629  |
| 44               | 1                | 0              | 0.614987                | 1.664027  | 1.154470  |
| 45               | 1                | 0              | -0.955549               | -0.802031 | -0.051246 |
| 46               | 6                | 0              | -0.090125               | 5.507131  | -1.560228 |
| 47               | 6                | 0              | 0.309548                | 6.563846  | -2.362937 |
| 48               | 6                | 0              | 1.641921                | 6.745950  | -2.690126 |
| 49               | 6                | 0              | 2.588756                | 5.855001  | -2.202611 |
| 50               | 6                | 0              | 2.206411                | 4.798233  | -1.401436 |
| 51               | 1                | 0              | 2.943748                | 4.106359  | -1.016663 |
| 52               | 1                | 0              | 3.635070                | 5.986608  | -2.448408 |
| 53               | 1                | 0              | 1.943889                | 7.573594  | -3.317425 |
| 54               | 1                | 0              | -0.437004               | 7.253767  | -2.736600 |

|    |   |   |           |           |           |
|----|---|---|-----------|-----------|-----------|
| 55 | 1 | 0 | -1.126172 | 5.351183  | -1.296836 |
| 56 | 6 | 0 | -2.559886 | 2.825742  | 3.117868  |
| 57 | 6 | 0 | -3.038101 | 3.404869  | 4.331336  |
| 58 | 7 | 0 | -2.820478 | 2.912035  | 5.530869  |
| 59 | 6 | 0 | -2.040543 | 1.748390  | 5.577244  |
| 60 | 6 | 0 | -1.514597 | 1.110214  | 4.437310  |
| 61 | 6 | 0 | -1.783497 | 1.211792  | 6.879125  |
| 62 | 6 | 0 | -1.030407 | 0.098579  | 7.033596  |
| 63 | 6 | 0 | -0.483026 | -0.543668 | 5.888979  |
| 64 | 6 | 0 | -0.715801 | -0.060165 | 4.645263  |
| 65 | 1 | 0 | -2.771798 | 3.298313  | 2.162091  |
| 66 | 1 | 0 | -3.633559 | 4.313728  | 4.276372  |
| 67 | 1 | 0 | -0.267785 | -0.563594 | 3.801767  |
| 68 | 1 | 0 | 0.131206  | -1.425822 | 6.020454  |
| 69 | 1 | 0 | -0.831895 | -0.306959 | 8.017320  |
| 70 | 1 | 0 | -2.210352 | 1.732934  | 7.726750  |
| 71 | 1 | 0 | -2.547109 | 1.166620  | 0.068334  |
| 72 | 6 | 0 | -4.670916 | 1.183025  | -1.988236 |
| 73 | 1 | 0 | -6.145491 | 0.124559  | -0.993346 |
| 74 | 1 | 0 | -5.354755 | 1.944650  | -2.337761 |
| 75 | 1 | 0 | -3.641230 | 1.318509  | -2.288196 |
| 76 | 6 | 0 | 1.820071  | 0.951204  | -3.567983 |
| 77 | 1 | 0 | 1.640361  | 1.856566  | -2.983114 |
| 78 | 1 | 0 | 2.705583  | 1.059736  | -4.194643 |
| 79 | 1 | 0 | 0.939906  | 0.731590  | -4.178134 |
| 80 | 8 | 0 | 0.084668  | 0.108679  | -1.729750 |
| 81 | 8 | 0 | 2.109497  | -0.158350 | -2.691552 |
| 82 | 6 | 0 | 2.632544  | -2.589026 | -1.249722 |
| 83 | 1 | 0 | 3.485622  | -1.996791 | -1.593666 |
| 84 | 6 | 0 | 3.061887  | -3.470695 | -0.071502 |
| 85 | 1 | 0 | 2.226241  | -4.087388 | 0.276852  |
| 86 | 1 | 0 | 3.875877  | -4.136477 | -0.382718 |
| 87 | 1 | 0 | 3.408570  | -2.866560 | 0.771507  |
| 88 | 6 | 0 | 2.139630  | -3.455986 | -2.433574 |
| 89 | 1 | 0 | 1.849800  | -2.848259 | -3.298562 |
| 90 | 1 | 0 | 2.942446  | -4.129741 | -2.755455 |
| 91 | 1 | 0 | 1.281685  | -4.070605 | -2.135439 |

---

*S7: Reference 24 details.*

24 M. J. Frisch, G. W. Trucks, H. B. Schlegel, G. E. Scuseria, M. A. Robb, J. R. Cheeseman, J. A. Jr. Montgomery, T. Vreven, K. N. Kudin, J. C. Burant, J. M. Millam, S. S. Iyengar, J. Tomasi, V. Barone, B. Mennucci, M. Cossi, G. Scalmani, N. Rega, G. A. Petersson, H. Nakatsuji, M. Hada, M. Ehara, K. Toyota, R. Fukuda, J. Hasegawa, M. Ishida, T. Nakajima, Y. Honda, O. Kitao, H. Nakai, M. Klene, X. Li, J. E. Knox, H. P. Hratchian, J. B. Cross, V. Bakken, C. Adamo, J. Jaramillo, R. Gomperts, R. E. Stratmann, O. Yazyev, A. J. Austin, R. Cammi, C. Pomelli, J. W. Ochterski, P. Y. Ayala, K. Morokuma, G. A. Voth, P. Salvador, J. J. Dannenberg, V. G. Zakrzewski, S. Dapprich, A. D. Daniels, M. C. Strain, O. Farkas, D. K. Malick, A. D. Rabuck, K. Raghavachari, J. B. Foresman, J. V. Ortiz, Q. Cui, A. G. Baboul, S. Clifford, J. Cioslowski, B. B. Stefanov, G. Liu, A. Liashenko, P. Piskorz, I. Komaromi, R. L. Martin, D. J. Fox, T. Keith, M. A. Al-Laham, C. Y. Peng, A. Nanayakkara, M. Challacombe, P. M. W. Gill, B. Johnson, W. Chen, M. W. Wong, C. Gonzalez and J. A. Pople, Gaussian 03, B05; 105 Gaussian, Inc.: Wallingford, CT, 2003.
